# Supplementary material for: Stimulation strength controls the rate of initiation but not the molecular organisation of TCR-induced signalling
Source: eLife journal article supplement (doi:10.7554/elife.53948), 2020-05-15
Supplement: supp [file elife-53948-supp-v1.zip]

Archive with 17 entries (17 files):
- elife_poa_e53948_Transparent_Reporting_File.docx
- elife_poa_e53948_Supplementary_file_1.xlsx
- elife_poa_e53948_Supplementary_file_2.xlsx
- elife_poa_e53948_Supplementary_file_3.xlsx
- elife_poa_e53948_Supplementary_file_4.xlsx
- elife_poa_e53948_Supplementary_file_5.xlsx
- elife_poa_e53948_Figure_2_figure_supplement_1.pdf
- elife_poa_e53948_Figure_2_figure_supplement_2.pdf
- elife_poa_e53948_Figure_3_figure_supplement_1.pdf
- elife_poa_e53948_Figure_3_figure_supplement_2.pdf
- elife_poa_e53948_Figure_3_figure_supplement_3.pdf
- elife_poa_e53948_Figure_4_figure_supplement_1.pdf
- elife_poa_e53948_Figure_4_figure_supplement_2.pdf
- elife_poa_e53948_Figure_5_figure_supplement_1.pdf
- elife_poa_e53948_Figure_6_figure_supplement_1.pdf
- elife_poa_e53948_Figure_7_figure_supplement_1.pdf
- elife_poa_e53948_Figure_7_source_data_1.xlsx
