# Supplementary material for: Stimulation strength controls the rate of initiation but not the molecular organisation of TCR-induced signalling
Source: eLife journal article supplement (doi:10.7554/elife.53948), 2020-05-15
Supplement: supp [file elife-53948-supp-v1.zip › elife_poa_e53948_Figure_7_source_data_1.xlsx]

## Sheet: Fig7_Source data file 1
Figure 7 - Source Data File 1: Data underlying plots in Figure 7a
% Positive	pERK AF350	pERK AF350	pERK AF350			pERK AF350	pERK AF350	pERK AF350			pERK AF350	pERK AF350	pERK AF350			pERK AF350	pERK AF350	pERK AF350
1h_N4	12.8	8.71	7.87		1h_T4	8.52	4.52	3.4		1h_G4	1.07	0.46	0.88		1h_NP68	0.51	0.64	0.78
2h_N4	10	20.1	8.92		2h_T4	6.04	8.13	4		2h_G4	0.86	0.79	1.14		2h_NP68	0.54	0.5	0.85
4h_N4	12.6	12.6	14.4		4h_T4	4.18	8.61	5.88		4h_G4	0.98	0.87	1.92		4h_NP68	0.61	0.49	1.13
6h_N4	6.29	8.13	11.7		6h_T4	5.65	5.99	8.44		6h_G4	0.9	1.16	2.94		6h_NP68	0.62	0.89	1.3
% Positive	pS6 V450	pS6 V450	pS6 V450			pS6 V450	pS6 V450	pS6 V450			pS6 V450	pS6 V450	pS6 V450			pS6 V450	pS6 V450	pS6 V450
1h_N4	17.7	27.4	11.7		1h_T4	15	23.4	5.35		1h_G4	3.92	4.47	1.46		1h_NP68	0.68	0.5	0.53
2h_N4	29.3	29.6	14.4		2h_T4	32.6	33.6	9.1		2h_G4	24.7	14.8	9.02		2h_NP68	2.03	1.26	2.24
4h_N4	41	38.4	27.1		4h_T4	62.8	66	25.1		4h_G4	48.1	34.7	22.4		4h_NP68	4.9	3.4	7.75
6h_N4	60.6	54.5	39.1		6h_T4	65	60.4	35.5		6h_G4	65.6	51.9	32		6h_NP68	13	8.87	13.8
% Positive	pSTAT5 AF488	pSTAT5 AF488	pSTAT5 AF488			pSTAT5 AF488	pSTAT5 AF488	pSTAT5 AF488			pSTAT5 AF488	pSTAT5 AF488	pSTAT5 AF488			pSTAT5 AF488	pSTAT5 AF488	pSTAT5 AF488
1h_N4	12.8	25.7	20.7		1h_T4	12.3	22.3	12.7		1h_G4	20.1	32.5	31.6		1h_NP68	18.5	23.4	30.6
2h_N4	14.2	19.2	14.4		2h_T4	17.3	25.2	11.4		2h_G4	40.6	50.2	31.5		2h_NP68	28.9	33.9	25.3
4h_N4	17.8	19.8	22.2		4h_T4	22.6	33	23.6		4h_G4	59.3	64.7	44.7		4h_NP68	39.9	39.6	49.8
6h_N4	20.2	22.9	41		6h_T4	31.3	29.1	37.7		6h_G4	63.4	58.4	56.8		6h_NP68	37.2	27.5	67.9
% Positive	pSLP76 PE	pSLP76 PE	pSLP76 PE			pSLP76 PE	pSLP76 PE	pSLP76 PE			pSLP76 PE	pSLP76 PE	pSLP76 PE			pSLP76 PE	pSLP76 PE	pSLP76 PE
1h_N4	9.03	13.3	4.87		1h_T4	2.2	2.04	1.62		1h_G4	0.51	0.7	0.85		1h_NP68	0.41	0.54	0.81
2h_N4	6.02	10.2	4.67		2h_T4	2.57	2.8	1.87		2h_G4	0.5	0.51	0.93		2h_NP68	0.32	0.45	0.79
4h_N4	5.9	3.66	5.11		4h_T4	2.11	1.99	2.69		4h_G4	0.51	0.44	1.04		4h_NP68	0.4	0.52	0.87
6h_N4	5.22	4.86	6.74		6h_T4	2.41	0.41	3.85		6h_G4	0.45	0.28	1.67		6h_NP68	0.32	0.31	1.07
% Positive	pZAP70 PECy7	pZAP70 PECy7	pZAP70 PECy7			pZAP70 PECy7	pZAP70 PECy7	pZAP70 PECy7			pZAP70 PECy7	pZAP70 PECy7	pZAP70 PECy7			pZAP70 PECy7	pZAP70 PECy7	pZAP70 PECy7
1h_N4	0.4	0.4	1.45		1h_T4	0.31	0.41	0.64		1h_G4	0.3	0.46	0.71		1h_NP68	0.25	0.42	0.56
2h_N4	0.28	0.53	1.43		2h_T4	0.32	0.3	1.08		2h_G4	0.29	0.38	1.1		2h_NP68	0.32	0.35	0.73
4h_N4	0.29	0.37	1.55		4h_T4	0.31	0.5	1.46		4h_G4	0.23	0.39	1.54		4h_NP68	0.26	0.45	0.95
6h_N4	0.35	0.57	5.74		6h_T4	0.33	0.29	5.69		6h_G4	0.34	0.35	8.7		6h_NP68	0.3	0.36	3.9
% Positive	CD44 BV711	CD44 BV711	CD44 BV711			CD44 BV711	CD44 BV711	CD44 BV711			CD44 BV711	CD44 BV711	CD44 BV711			CD44 BV711	CD44 BV711	CD44 BV711
1h_N4	31.2	31.7	25.3		1h_T4	29	30.1	19.4		1h_G4	13	11.4	8.64		1h_NP68	10.5	4.95	7.13
2h_N4	40.6	41	27.3		2h_T4	33.3	36.6	19.8		2h_G4	15.6	13.8	11.7		2h_NP68	10.3	9.28	8.38
4h_N4	49.6	41.2	30.3		4h_T4	49.8	44.1	29		4h_G4	29.6	16.2	17.8		4h_NP68	13.5	6.75	9.5
6h_N4	59	53.9	43.1		6h_T4	62	53.6	40		6h_G4	54.2	33.8	31.1		6h_NP68	15.1	7.92	15.1
