# Supplementary material for: Stimulation strength controls the rate of initiation but not the molecular organisation of TCR-induced signalling
Source: eLife journal article supplement (doi:10.7554/elife.53948), 2020-05-15
Supplement: supp [file elife-53948-supp-v1.zip › elife_poa_e53948_Supplementary_file_1.xlsx]

## Sheet: Replicate structure
Supplementary File 1
Biological replicate structure
Experiment	Biological Replicate	Timepoints per biological replicate	Stimulus	No. Conditions	No. conditions pooled for staining	Notes
Cytof 1	1	0h, 1h	N4, T4, G4, NP68	5	5
	2	0h, 1h	N4, T4, G4, NP68	5	5
	3	0h, 1h, 2h	N4, T4, G4, NP68	9	9
	4	0h, 1h, 2h	N4, T4, G4, NP68	9	9
Cytof 2	1	0h, 1h, 2h, 4h, 6h	N4, T4, G4, NP68	17	19*	*including 2 samples from replicate 2
	2	0h, 1h, 2h, 4h, 6h	N4, T4, G4, NP68	17	19*	*including 2 samples from replicate 1
pS6, pERK and CD44 expression after Inhibitor treatment	1	0h, 4h	N4, NP68	21	N/A
	2	0h, 4h	N4, NP68	21	N/A
	3	0h, 4h	N4, NP68	21	N/A
Proliferation after Inhibitor treatment	1	2 days	N4, NP68	13	N/A
	2	2 days	N4, NP68	13	N/A
	3	2 days	N4, NP68	13	N/A
Combined RNA flow cytometry with pS6	1	0h, 1h, 2h, 4h, 6h	N4, T4, G4, NP68	17	N/A
	2	0h, 1h, 2h, 4h, 6h	N4, T4, G4, NP68	17	N/A
	3	0h, 1h, 2h, 4h, 6h	N4, T4, G4, NP68	17	N/A
Peptide Titration	1	0h, 2h, 4h	N4, T4, G4, NP68	25	N/A
	2	0h, 2h, 4h	N4, T4, G4, NP68	25	N/A
	3	0h, 2h, 4h	N4, T4, G4, NP68	25	N/A
No IL2 - pS6, pSTAT5	1	0h, 4h	N4, T4, G4, NP68	10	N/A
	2	0h, 4h	N4, T4, G4, NP68	10	N/A
	3	0h, 4h	N4, T4, G4, NP68	10	N/A
No IL2 - pERK, pAKT, I𝜅B⍺	1	0h, 4h	N4, T4, G4, NP68	10	N/A
	2	0h, 4h	N4, T4, G4, NP68	10	N/A
	3	0h, 4h	N4, T4, G4, NP68	10	N/A
BMDC phenotyping	1	0h, 1 day maturation	LPS + IL4	2	N/A
	2	0h, 1 day maturation	LPS + IL4	2	N/A
	3	0h, 1 day maturation	LPS + IL4	2	N/A
	4	0h, 1 day maturation	LPS + IL4	2	N/A
	5	0h, 1 day maturation	LPS + IL4	2	N/A
T cell stimulation using BMDCs	1	1h, 2h, 4h, 6h	N4, T4, G4, NP68	16	N/A
	2	1h, 2h, 4h, 6h	N4, T4, G4, NP68	16	N/A
	3	1h, 2h, 4h, 6h	N4, T4, G4, NP68	16	N/A
CD80-ICAM expression in T cells	1	0h, 6h	N4, T4, G4, NP68	5	N/A
	2	0h, 6h	N4, T4, G4, NP68	5	N/A
	3	0h, 6h	N4, T4, G4, NP68	5	N/A
