# Supplementary material for: Stimulation strength controls the rate of initiation but not the molecular organisation of TCR-induced signalling
Source: eLife journal article supplement (doi:10.7554/elife.53948), 2020-05-15
Supplement: supp [file elife-53948-supp-v1.zip › elife_poa_e53948_Supplementary_file_2.xlsx]

## Sheet: Sheet1
Supplementary File 2: Key Resources Table
Reagent type (species) or resource	Designation	Source or reference	Identifiers	Additional information
strain, strain background (Mus musculus)	OT-I Rag1tm1Bal on a C57BL/6 background	PMID: 22345701 (OT-1); PMID: 7926785 (Rag1 deficient); PMID:10762410	RRID:MGI:3783835	OT-I allele: Tg(TcraTcrb)1100Mjb, MGI:3054907; Rag1 deficient allele Rag1<tm1Bal>, MGI:2448994
strain, strain background (Mus musculus)	C57BL/6 (C57BL/6NTac)	Taconic	RRID:MGI:2159769	Bred at the Wellcome Trust Sanger Institute, University of Cambridge, MGI:2159769
Antibody	Anti-CD16/32 (Rat IgG2a, clone 93)	Biolegend	Cat#: 101302, RRID:AB_312801	Flow cytometry (1µg/ million cells), FC receptor blocking antibody
Antibody	Anti-CD3e (Armenian Hamster IgG1, clone 145-2C11)	BD Biosciences	Cat#: 553058, RRID:AB_394591	T cell activation (1 : 500)
Antibody	Anti-CD25- BV421 (Rat IgG2b, clone 3C7)	Biolegend	Cat#: 101923, RRID:AB_2810329	Flow cytometry cell suface stain (5 µl per test)
Antibody	Anti-CD44- APC (Rat IgG2b, clone IM7)	Biolegend	Cat#: 103012, RRID:AB_312963	Flow cytometry cell suface stain ( 1: 400)
Antibody	Anti-CD8- APC (Rat IgG2a, clone 53-6.7)	Biolegend	Cat#: 100712, RRID:AB_312751	Flow cytometry cell suface stain (1 : 200)
Antibody	Anti- CD69 - APC (Armenian Hamster IgG, clone H1.2F3)	Thermofisher/ eBioscience	Cat#: 17-0691-82 , RRID:AB_1210795	Flow cytometry cell suface stain (1 : 400)
Antibody	Anti- CD62L-PE (Rat IgG2a, clone MEL-14)	Thermofisher/ eBioscience	Cat#: 12-0621-82 , RRID:AB_465721	Flow cytometry cell suface stain (1 : 400)
Antibody	Anti- CD8 - BV785 (Rat IgG2a, clone 53-6.7)	Biolegend	Cat#: 100750, RRID:AB_2562610	Flow cytometry cell suface stain (1 : 50)
Antibody	Anti- CD44 - BV711 (Rat IgG2b, clone IM7)	Biolegend	Cat#: 103057, RRID:AB_2564214	Flow cytometry cell suface stain (1 : 50)
Antibody	Anti- ICAM-1 (CD54) - PE (Rat IgG2b, clone YN1/1.7.4)	Biolegend	Cat#: 116107, RRID:AB_313698	Flow cytometry cell suface stain (1 : 100)
Antibody	Anti- CD80 - APC (Armenian Hamster IgG, clone 16-10A1)	Biolegend	Cat#: 104713, RRID:AB_313134	Flow cytometry cell suface stain (1 : 100)
Antibody	Anti- CD11c - PE (Armenian Hamster IgG, clone N418)	Biolegend	Cat#: 117307, RRID:AB_313776	Flow cytometry cell suface stain (1 : 100)
Antibody	Anti- CD86 - BV785 (Rat IgG2a, clone GL-1)	Biolegend	Cat#: 105043, RRID:AB_2566722	Flow cytometry cell suface stain (1 : 100)
Antibody	Anti- CD40 - FITC (Rat IgG2a, clone 3/23)	Biolegend	Cat#: 124607, RRID:AB_1134090	Flow cytometry cell suface stain (1 : 100)
Antibody	Anti- MHC Class II - PE-Cyanine7 (Rat IgG2b, clone M5/114.15.2)	Thermofisher/ eBioscience	Cat#: 25-5321-80, RRID:AB_10870792	Flow cytometry cell suface stain (1 : 100)
Antibody	Anti- pERK 1/2 [T202/Y204] (Rabbit IgG, clone D13.14.4E)	CST	Cat#: 8544, RRID:AB_11127856	Flow cytometry Intracellular stain (1 : 400)
Antibody	Anti- pAKT [S473] (Rabbit IgG, clone D9E)	CST	Cat#: 4060, RRID:AB_2315049	Flow cytometry Intracellular stain (1 : 100)
Antibody	Anti- I𝜅B⍺ (Mouse IgG1, clone L35A5)	CST	Cat#: 4814, RRID:AB_390781	Flow cytometry Intracellular stain (1 : 100)
Antibody	Anti- pSTAT5 [Y694] - AF488 (Mouse IgG1, clone 47/Stat5(pY694))	BD Biosciences	Cat#: 612598, RRID:AB_399881	Flow cytometry Intracellular stain (20 µl per test)
Antibody	Anti- pS6 [S235/S236] - PE (Mouse IgG1, clone N7-548)	BD Biosciences	Cat#: 560433, RRID:AB_2827879	Flow cytometry Intracellular stain (20 µl per test)
Antibody	Anti- pS6 [S235/S236] -V450 (Mouse IgG1, clone N7-548)	BD Biosciences	Cat#: 561457, RRID:AB_10643763	Flow cytometry Intracellular stain (5 µl per test)
Antibody	Anti- pSLP76 [Y128] - PE (Mouse IgG1, clone J141-668.36.58)	BD Biosciences	Cat#: 558437, RRID:AB_647246	Flow cytometry Intracellular stain (20 µl per test)
Antibody	Anti- pZAP70 [Y319]/Syk [Y352] - PECy7 (Mouse IgG1, clone 17A/P-ZAP70)	BD Biosciences	Cat#: 561458, RRID:AB_10696417	Flow cytometry Intracellular stain (5 µl per test)
Antibody	Anti- pPLCγ1 (Rabbit IgG, clone D6M9S)	CST Custom	Cat#: 14008, RRID:AB_2728690	Flow cytometry Intracellular stain (1 : 200)
Antibody	Rabbit IgG Isotype Control (Rabbit IgG, clone DA1E)	CST	Cat#: 3900, RRID:AB_1550038	Flow cytometry Intracellular stain (1 : 400)
Antibody	Purified Mouse IgG1 Isotype Control (Mouse IgG1, clone MG1-45)	Biolegend	Cat#: 401401, RRID:AB_2801452	Flow cytometry Intracellular stain (1 : 100)
Antibody	Purified Mouse IgG2a Isotype Control (Moues IgG2a, clone MG2a-53)	Biolegend	Cat#: 401502, RRID:AB_2800437	Flow cytometry Intracellular stain (1 : 100)
Antibody	Purified Mouse IgG2b Isotype Control (Mouse IgG2b, clone MG2b-57)	Biolegend	Cat#: 401201, RRID:AB_2744505	Flow cytometry Intracellular stain (1 : 100)
Antibody	Donkey anti-Rabbit IgG Highly Cross-Adsorbed Secondary Ab- AF488	Thermofisher	Cat#: A-21206, RRID:AB_2535792	Flow cytometry (1 : 200)
Antibody	Goat anti-Rabbit IgG Highly Cross-Adsorbed Ab- AF546	Thermofisher	Cat#: A-11035, RRID:AB_143051	Flow cytometry (1 : 200)
Antibody	Goat anti-Rabbit IgG Cross-Adsorbed Ab- AF405	Thermofisher	Cat#: A-31556, RRID:AB_221605	Flow cytometry (1 : 200)
Antibody	Goat ant-Rabbit IgG Highly Cross-Adsorbed Secondary Ab - AF633	Thermofisher	Cat#: A-21071, RRID:AB_2535732	Flow cytometry (1 : 200)
Antibody	Goat anti-Rabbit Highly Cross-Adsorbed Secondary Ab - AF350	Thermofisher	Cat#: A-21068, RRID:AB_141378	Flow cytometry (1 : 200)
Antibody	Goat anti-Mouse IgG Highly Cross-Adsorbed Secondary Ab- AF568	Thermofisher	Cat#: A-11031, RRID:AB_144696	Flow cytometry (1 : 200)
Antibody	Donkey anti-Mouse IgG Highly Cross-Adsorbed Secondary Ab- AF594	Thermofisher	Cat#: A-21203, RRID:AB_141633	Flow cytometry (1 : 200)
Antibody	Goat anti-Mouse IgG Highly Cross-Adsorbed Secondary Ab - AF647	Thermofisher	Cat#: A-21236, RRID:AB_141725	Flow cytometry (1 : 200)
Antibody	Anti- PLCγ1 (Rabbit, clone D9H10)	CST	Cat#: 5690, RRID:AB_10691383	Western Blot (1 : 1000)
Antibody	Anti- CD25 - 151Eu (Rat IgG2b, clone 3C7)	Fluidigm	Cat#: 3151007B, RRID:AB_2827880	Mass cytometry cell suface stain (1 : 100)
Antibody	Anti- CD69 - 143Nd (Armenian Hamster IgG, clone H1.2F3)	Fluidigm	Cat#: 3143004B, RRID:AB_2827881	Mass cytometry cell suface stain (1 : 100)
Antibody	Anti- CD62L -160Gd (Rat IgG2a, clone MEL-14)	Fluidigm	Cat#: 3160008B, RRID:AB_2687840	Mass cytometry cell suface stain (1 : 100)
Antibody	Anti- CD45 - 89Y (Rat IgG2b, clone 30F11)	Fluidigm	Cat#: 3089005B, RRID:AB_2651152	Mass cytometry cell suface stain (1 : 100)
Antibody	Anti- CD8⍺ - 146Nd (Rat IgG2a, clone 53-6.7)	Fluidigm	Cat#: 3146003B, RRID:AB_2687833	Mass cytometry cell suface stain (1 : 50)
Antibody	Anti- CD44 - 150Nd (Rat IgG2b, clone IM7)	Fluidigm	Cat#: 3150018B, RRID:AB_2827882	Mass cytometry cell suface stain (1 : 100)
Antibody	Anti-TCRβ - 169Tm (Armenian Hamster IgG, clone H57-597)	Fluidigm	Cat#: 3169002B, RRID:AB_2827883	Mass cytometry cell suface stain (1 : 50)
Antibody	Anti- pZAP70 [Y319]/Syk [Y352] - 171Yb (Mouse IgG1, clone 17A/P-ZAP70)	Fluidigm	Cat#: 3171005A, RRID:AB_2827884	Mass cytometry Intracellular stain (1 : 100)
Antibody	Anti- pSLP76 [Y128] - 156Gd (Mouse IgG1, clone J141-668.36.58)	Fluidigm	Cat#: 3156003A, RRID:AB_2827885	Mass cytometry Intracellular stain (1 : 100)
Antibody	Anti- pLCK [Y505] - 162Dy (Mouse IgG1, clone 4/LCK-Y505)	Fluidigm	Cat#: 3162004A, RRID:AB_2827886	Mass cytometry Intracellular stain (1 : 100)
Antibody	Anti- pAKT [S473] - 152Sm (Rabbit IgG, clone D9E)	Fluidigm	Cat#: 3152005A, RRID:AB_2811246	Mass cytometry Intracellular stain (1 : 100)
Antibody	Anti- pERK 1/2 [T202/Y204] - 167Er (Rabbit IgG, clone D13.14.4E)	Fludigm	Cat#: 3167005A, RRID:AB_2661834	Mass cytometry Intracellular stain (1 : 100)
Antibody	Anti- pS6 [S235/S236] - 175Lu (Mouse IgG1, clone N7-548)	Fluidigm	Cat#: 3175009A, RRID:AB_2811251	Mass cytometry Intracellular stain (1 : 100)
Antibody	Anti- pSTAT5 [Y694] - 147Sm (Mouse IgG1, clone 47)	Fluidigm	Cat#: 3147012A, RRID:AB_2827887	Mass cytometry Intracellular stain (1 : 100)
Antibody	Anti- I𝜅B⍺- 164Dy (Mouse IgG1, clone L35A5)	Fluidigm	Cat#: 3164004A, RRID:AB_2811249	Mass cytometry Intracellular stain (1 : 100)
Antibody	Anti- ZAP70 ( Mouse IgG1, clone1E7.2)	Thermofisher	Cat#: 37-6500, RRID:AB_2533332	Mass cytometry Intracellular stain (1 : 100)
Antibody	Anti- SLP-76 (Mouse IgG2a, clone H76)	Biolegend	Cat#: 625002, RRID:AB_2136888	Mass cytometry Intracellular stain (1 : 50)
Antibody	Anti- Lck (Mouse IgG2b, clone 3A5)	Merck Millipore	Cat#: 05-435, RRID:AB_309733	Mass cytometry Intracellular stain (1 : 50)
Antibody	Anti- PLCγ1 (Mouse IgG1, clone 3H1C10)	Novus	Cat#: NBP2-52533, RRID:AB_2827888	Mass cytometry Intracellular stain (1 : 100)
Antibody	Anti- AKT (Rabbit IgG, clone C67E7)	CST Custom	Cat#: 4691, RRID:AB_915783	Mass cytometry Intracellular stain (1 : 100)
Antibody	Anti- ERK1/ERK2 (Rabbit IgG, clone 137F5)	CST Custom	Cat#: 4695, RRID:AB_390779	Mass cytometry Intracellular stain (1 : 100)
Antibody	Anti- S6 (Mouse IgG1, clone 54D2)	CST Custom	Cat#: 2317, RRID:AB_2238583	Mass cytometry Intracellular stain (1 : 200)
Antibody	Anti- STAT5 (Mouse IgG1, clone ST5-8F7)	Thermofisher	Cat#: 33-5900, RRID: AB_2533129	Mass cytometry Intracellular stain (1 : 50)
chemical compound, drug	MEK162 (Binimetinib, ARRY-162, ARRY-438162)	Selleckchem	Cas#: 606143-89-9, Cat#: S7007	Inhibitor (0.5µM, 1µM, 5µM)
chemical compound, drug	Rapamycin	Sigma-Aldrich / Merck	Cas#: 53123-88-9, Cat#: 553211	Inhibitor (20nM, 200nM, 2µM)
chemical compound, drug	PP2	Sigma-Aldrich / Merck	Cas#: 172889-27-9, Cat#: P0042	Inhibitor (1, 10µM)
chemical compound, drug	U73122	Tocris Biotechne	Cas#: 112648-68-7, Cat#: 1268	Inhibitor (1, 10µM)
chemical compound, drug	IC87114	Sigma-Aldrich / Merck	Cas#: 371242-69-2, Cat#: 528118	Inhibitor (1, 5, 10µM)
chemical compound, drug	LY294002	Sigma-Aldrich / Merck	Cas#: 154447-36-6, Cat#: 440204	Inhibitor (1, 5, 10µM)
chemical compound, drug	Tofacitinib	Generon (APExBIO)	Cas#: 477600-75-2, Cat#: A4138	Inhibitor (100nM, 1µM, 10µM)
chemical compound, drug	Parthenolide	Insight Biotechnology	Cas#: 20554-84-1, Cat#: HY-N0141	Inhibitor (5, 10µM)
chemical compound, drug	PMA	Sigma-Aldrich / Merck	Cas#: 16561-29-8, Cat#: P8139	T cell activation (50nM)
chemical compound, drug	Ionomycin	Sigma-Aldrich / Merck	Cas#: 56092-81-0, Cat#: I9657	T cell activation (1µg/ml)
chemical compound, drug	Pervanadate (sodium orthovanadate)	Sigma-Aldrich / Merck	Cas#: 13721-39-6, Cat#: S6508	T cell activation (1mM)
sequence-based reagent	ribosomal protein L39 (Rpl39)	Thermofisher	Cat#: VB4-3120826-204	PrimeFlow probes (5µl per test)
sequence-based reagent	Interferon regulatory factor 8 (Irf8)	Thermofisher	Cat#: VB6-3197312-210	PrimeFlow probes (5µl per test)
sequence-based reagent	Interferon regulatory factor 8 (Irf8)	Thermofisher	Cat#: VB1-13213-204	PrimeFlow probes (5µl per test)
sequence-based reagent	nuclear receptor subfamily 4, group A, member 1 (Nr4a1)	Thermofisher	Cat#: VB1-12484-204	PrimeFlow probes (5µl per test)
sequence-based reagent	SMARTpool: ON-TARGETplus Mouse Plcg1 siRNA	Dharmacon	Cat#: L-040978-01-0005	siRNA (3µg in 100µl)
sequence-based reagent	ON-TARGETplus Non-targeting Control Pool	Dharmacon	Cat#: D-001810-10-05	siRNA (3µg in 100µl)
commercial assay or kit	Thermofisher Primeflow RNA Assay Kit	Thermofisher	Cat#: 88-18005-204
other	Zombie NIR Fixable Viability Kit	Biolegend	Cat#: 423106	Live dead stain (1 : 200)
other	Zombie Aqua Fixable Viability Kit	Biolegend	Cat#: 423101	Live dead stain (1 : 500)
other	Cell Proliferation Dye eFluor 450	Thermofisher/ eBioscience	Cat#: 65-0863-14	Cell proliferation dye (10µM)
other	UltraComp eBeads	Thermofisher/ eBioscience	Cat#: 01-2222-42	Compensation Beads (1 drop)
other	Cell-ID Cisplatin	Fluidigm	Cat#: 201064	Mass cytometry Live dead stain (5µM)
other	Cell-ID Intercalator-Ir	Fluidigm	Cat#: 201192B	Mass cytometry DNA stain (125nM)
other	Maxpar Cell Staining Buffer	Fluidigm	Cat#: 201068	Mass cytometry reagent
other	Maxpar Fix and Perm Buffer	Fluidigm	Cat#: 201067	Mass cytometry reagent
other	Maxpar Fix I Buffer	Fluidigm	Cat#: 201065	Mass cytometry reagent
other	Cell-ID 20-Plex Pd Barcoding Kit	Fluidigm	Cat#: 201060	Mass cytometry reagent
other	Pierce 16% Formaldehyde, methanol-free (ampule)	Thermofisher	Cat#: 28906	Mass cytometry reagent
peptide, recombinant protein	Recombinant Murine GM-CSF	Peprotech	Cat#: 315-03	BMDC culture (20 ng/ml)
other	LPS (Lipopolysaccharide)	Thermofisher/ eBioscience	Cat#: 00-4976-03	BMDC culture (50 ng/ml)
peptide, recombinant protein	Recombinant mouse IL-4 protein	Abcam	Cat#: ab9729	BMDC culture (20 ng/ml)
software, algorithm	FlowJo (v10)	FlowJo	RRID: SCR_008520	Data Analysis
software, algorithm	Prism (v8)	GraphPad Prism	RRID:SCR_002798	Data Analysis
