# Supplementary material for: Stimulation strength controls the rate of initiation but not the molecular organisation of TCR-induced signalling
Source: eLife journal article supplement (doi:10.7554/elife.53948), 2020-05-15
Supplement: supp [file elife-53948-supp-v1.zip › elife_poa_e53948_Supplementary_file_3.xlsx]

## Sheet: Sheet 1
Supplementary File 3: Antibodies for Mass Cytometry
Antibody supplier	Custom conjugation	Label	Target	Antibody Clone	Antibody Concentration (µg/ul)	Working Concentration (ng/ul)
Surface staining primary
Fluidigm	0	89Y	CD45	30-F11	0.5	5
Fluidigm	0	146Nd	CD8⍺	53-6.7	0.05	1
Fluidigm	0	150Nd	CD44	IM7	0.075	0.75
Fluidigm	0	151Eu	CD25	3C7	0.5	5
Fluidigm	0	169Tm	TCRβ	H57-597	0.075	1.5
Fluidigm	0	143Nd	CD69	H1.2F3	0.2	2
Intracellular staining phosphosignalling nodes
Fluidigm	0	147Sm	pSTAT5 [Y694]	47	0.25	2.5
Fluidigm	0	152Sm	pAKT [S473]	D9E	0.25	2.5
Fluidigm	0	156 Gd	pSLP76 [Y128]	J141-668.36.58	0.25	2.5
Fluidigm	0	162Dy	pLCK [Y505]	4/LCK-Y505	0.2	2
Fluidigm	0	164Dy	I𝜅B⍺	L35A5	0.125	1.25
CST Custom	1	165 Ho	pPLC𝛾1 [Y783]	D6M9S	0.5	5
Fluidigm	0	167Er	pERK 1/2 [T202/Y204]	D13.14.4E	0.5	5
Fluidigm	0	171Yb	pZAP70 [Y319]/Syk [Y352]	17a	0.1	1
Fluidigm	0	175Lu	pS6 [S235/S236]	N7-548	0.2	2
Intracellular staining total protein
CST Custom	1	149 Sm	ERK1/2	137F5	0.5	5
CST Custom	1	153 Eu	S6	54D2	0.5	2.5
Merck Millipore	1	154 Sm	Lck	3A5	0.5	10
Novus	1	158 Gd	PLC𝛾1	3H1C10	0.5	5
Thermofisher	1	159 Tb	ZAP70	1E7.2	0.5	5
Biolegend	1	170 Er	SLP76	H76	0.5	10
Thermofisher	1	173 Yb	Stat 5	ST5-8F7	0.5	10
CST Custom	1	176 Yb	AKT	C67E7	0.5	5
