# Supplementary material for: Stimulation strength controls the rate of initiation but not the molecular organisation of TCR-induced signalling
Source: eLife journal article supplement (doi:10.7554/elife.53948), 2020-05-15
Supplement: supp [file elife-53948-supp-v1.zip › elife_poa_e53948_Supplementary_file_4.xlsx]

## Sheet: Sheet 1
Supplementary File 4: Antibody Testing and Specificity
Supplementary Table 4a
Protein Target	Clone	Method	Pre and post metal conjugation	Further Validation	Reference	Vendor Advanced Verification
ZAP70	1E7.2	Phosphoflow + Cytof	Yes	Transfect HEK293T with ZAP70 EGFP	6, 8	Yes	Verifed by IP Mass Spectrometry
SLP-76	H76	Phosphoflow + Cytof	Yes	Transfect HEK293T with SLP76 YFP
Lck	3A5	Phosphoflow + Cytof	Yes	Transfect HEK293T with LCK YFP	4
PLCγ1	3H1C10	Phosphoflow + Cytof	Yes	siRNA knockdown of PLCγ1		Yes	WB: PLCg1 mAB against HEK293s transfected with PLCG1.
AKT	C67E7	Phosphoflow + Cytof	Yes		3
ERK1/ERK2	137F5	Phosphoflow + Cytof	Yes		1	Yes	WB: HEK 293 cells transfected with ERK1/2 siRNA showing knockdown
S6	54D2	Phosphoflow + Cytof	Yes		11
STAT5	ST5-8F7	Phosphoflow + Cytof	Yes			Yes	WB: HeLa cell knockdown using STAT5 siRNA
Supplementary Table 4b
Protein Target	Clone	Method	Stimulus	Inhibitor
pLCK [Y505]	4/LCK-Y505	Phosphoflow	TcR	PP2
pPLCγ1 [Y783]	D6M9S	Phosphoflow	Pervanadate	U73122
pAKT [S473]	D9E	Phosphoflow + Cytof	TcR	IC87114
				LY294002
				Wortmannin
pERK 1/2 [T202/Y204]	D13.14.4E	Phosphoflow + Cytof	TcR	MEK162
pS6 [S235/S236]	N7-548	Phosphoflow + Cytof	TcR	Rapamycin
pSTAT5 [Y694]	47	Phosphoflow + Cytof	IL2, TcR	Tofacitinib
I𝜅B⍺	L35A5	Phosphoflow + Cytof	PMA/I	Parthenolide
Supplementary Table 4c
Protein Target	Clone	Method	Stimulus	References
pZAP70 [Y319]/Syk [Y352]	17a	Phosphoflow + Cytof	Pervanadate, TcR	5
pSLP76 [Y128]	J141-668.36.58	Phosphoflow + Cytof	Pervanadate, TcR	7, 15
pLCK [Y505]	4/LCK-Y505	Phosphoflow + Cytof	Pervanadate, TcR	16
pPLCγ1 [Y783]	D6M9S	Phosphoflow + Cytof	Pervanadate, TcR	9
pAKT [S473]	D9E	Phosphoflow + Cytof	Pervanadate, TcR	3, 13
pERK 1/2 [T202/Y204]	D13.14.4E	Phosphoflow + Cytof	Pervanadate, TcR, PMA/I	1
pS6 [S235/S236]	N7-548	Phosphoflow + Cytof	Pervanadate, TcR, PMA/I	2
pSTAT5 [Y694]	47	Phosphoflow + Cytof	Pervanadate, TcR, PMA/I	10, 15
I𝜅B⍺	L35A5	Phosphoflow + Cytof	Pervanadate, TcR, PMA/I	12, 13, 14
References
1	de Jong, P. R. et al. ERK5 signalling rescues intestinal epithelial turnover and tumour cell proliferation upon ERK1/2 abrogation. Nat Commun 7, 11551, doi:10.1038/ncomms11551 (2016).
2	Blatt, K. et al. The PI3-kinase/mTOR-targeting drug NVP-BEZ235 inhibits growth and IgE-dependent activation of human mast cells and basophils. PLoS One 7, e29925, doi:10.1371/journal.pone.0029925 (2012).
3	McNamara, C. R. et al. Akt Regulates TNFalpha synthesis downstream of RIP1 kinase activation during necroptosis. PLoS One 8, e56576, doi:10.1371/journal.pone.0056576 (2013).
4	Gust, T. C. et al. RNA interference-mediated gene silencing in murine T cells: in vitro and in vivo validation of proinflammatory target genes. Cell Commun Signal 6, 3, doi:10.1186/1478-811X-6-3 (2008).
5	Chan, S. M., Olson, J. A. & Utz, P. J. Single-cell analysis of siRNA-mediated gene silencing using multiparameter flow cytometry. Cytometry A 69, 59-65, doi:10.1002/cyto.a.20209 (2006).
6	Fallah-Arani, F., Schweighoffer, E., Vanes, L. & Tybulewicz, V. L. Redundant role for Zap70 in B cell development and activation. Eur J Immunol 38, 1721-1733, doi:10.1002/eji.200738026 (2008).
7	Fasbender, F., Claus, M., Wingert, S., Sandusky, M. & Watzl, C. Differential Requirements for Src-Family Kinases in SYK or ZAP70-Mediated SLP-76 Phosphorylation in Lymphocytes. Front Immunol 8, 789, doi:10.3389/fimmu.2017.00789 (2017).
8	DeFord-Watts, L. M. et al. The CD3 zeta subunit contains a phosphoinositide-binding motif that is required for the stable accumulation of TCR-CD3 complex at the immunological synapse. J Immunol 186, 6839-6847, doi:10.4049/jimmunol.1002721 (2011).
9	Kang, D. S. et al. Netrin-1/DCC-mediated PLCgamma1 activation is required for axon guidance and brain structure development. EMBO Rep 19, doi:10.15252/embr.201846250 (2018).
10	Bitar, M. et al. Evaluating STAT5 Phosphorylation as a Mean to Assess T Cell Proliferation. Front Immunol 10, 722, doi:10.3389/fimmu.2019.00722 (2019).
11	Chen, W. & Dittmer, D. P. Ribosomal protein S6 interacts with the latency-associated nuclear antigen of Kaposi's sarcoma-associated herpesvirus. J Virol 85, 9495-9505, doi:10.1128/JVI.02620-10 (2011).
12	Abe, T. & Barber, G. N. Cytosolic-DNA-mediated, STING-dependent proinflammatory gene induction necessitates canonical NF-kappaB activation through TBK1. J Virol 88, 5328-5341, doi:10.1128/JVI.00037-14 (2014).
13	Clift, D. et al. A Method for the Acute and Rapid Degradation of Endogenous Proteins. Cell 171, 1692-1706 e1618, doi:10.1016/j.cell.2017.10.033 (2017).
14	Schwamborn, R., Dussmann, H., Konig, H. G. & Prehn, J. H. M. Time-lapse imaging of p65 and IkappaBalpha translocation kinetics following Ca(2+)-induced neuronal injury reveals biphasic translocation kinetics in surviving neurons. Mol Cell Neurosci 80, 148-158, doi:10.1016/j.mcn.2017.02.007 (2017).
15	Bodenmiller, B. et al. Multiplexed mass cytometry profiling of cellular states perturbed by small-molecule regulators. Nat Biotechnol 30, 858-867, doi:10.1038/nbt.2317 (2012).
16	Zhou, J., Zhang, Q., Henriquez, J. E., Crawford, R. B. & Kaminski, N. E. Lymphocyte-Specific Protein Tyrosine Kinase (LCK) is Involved in the Aryl Hydrocarbon Receptor-Mediated Impairment of Immunoglobulin Secretion in Human Primary B Cells. Toxicol Sci 165, 322-334, doi:10.1093/toxsci/kfy133 (2018).
