# Supplementary material for: Stimulation strength controls the rate of initiation but not the molecular organisation of TCR-induced signalling
Source: eLife journal article supplement (doi:10.7554/elife.53948), 2020-05-15
Supplement: supp [file elife-53948-supp-v1.zip › elife_poa_e53948_Supplementary_file_5.xlsx]

## Sheet: A) Figure 3 underlying data
Supplementary File 5
Mean and SD of signalling protein measurements in Figure 3a and Figure 3 - figure supplement 2a
	N4			T4			G4			NP68
pERK	Mean	SD	N	Mean	SD	N	Mean	SD	N	Mean	SD	N
0h	1.51333	0.623046	6	1.51333	0.623046	6	1.51333	0.623046	6	1.51333	0.623046	6
1h	44.2333	10.5052	6	13.9783	4.49956	6	6.24167	1.57413	6	5.90167	7.33529	6
2h	50.15	5.41756	4	19.75	6.13868	4	8.0575	2.70836	4	4.3375	3.51439	4
4h	42.75	0.353553	2	22.35	2.19203	2	15	0.565685	2	4.975	2.48194	2
6h	10.66	1.32936	2	4.405	0.403051	2	5.4	0.494975	2	1.105	0.13435	2
pAKT	Mean	SD	N	Mean	SD	N	Mean	SD	N	Mean	SD	N
0h	4.14833	1.07997	6	4.14833	1.07997	6	4.14833	1.07997	6	4.14833	1.07997	6
1h	14.7333	2.44104	6	7.14333	1.98424	6	5.425	1.49306	6	5.26167	1.59648	6
2h	17.6	4.27161	4	9.0175	2.73957	4	6.265	2.02123	4	6.005	2.09565	4
4h	13.8	2.26274	2	12.45	1.3435	2	8.45	1.95161	2	6.305	1.22329	2
6h	10.475	2.86378	2	9.64	2.48902	2	10.555	2.18496	2	4.68	1.08894	2
pS6	Mean	SD	N	Mean	SD	N	Mean	SD	N	Mean	SD	N
0h	2.31333	1.14861	6	2.31333	1.14861	6	2.31333	1.14861	6	2.31333	1.14861	6
1h	58.0667	4.11226	6	19	4.67632	6	8.035	1.66042	6	6.64167	8.89664	6
2h	66.2	6.45342	4	38.85	21.4882	4	14.345	9.11857	4	10.175	10.7445	4
4h	80.25	0.353553	2	76.5	2.40416	2	40.15	3.88909	2	11.17	1.73948	2
6h	87.85	3.74767	2	85.1	4.80833	2	68.95	4.45477	2	1.725	0.0212132	2
pSTAT5	Mean	SD	N	Mean	SD	N	Mean	SD	N	Mean	SD	N
0h	21.1667	2.68676	6	21.1667	2.68676	6	21.1667	2.68676	6	21.1667	2.68676	6
1h	25.5	3.89513	6	20.5333	3.02038	6	19.5667	3.74629	6	17.9333	4.27629	6
2h	35.9	5.89237	4	30.15	9.92388	4	24.6	6.27163	4	23.7	7.541	4
4h	57.75	5.16188	2	64.15	2.89914	2	49.55	0.636396	2	36.5	6.08112	2
6h	51.65	1.48492	2	56.3	0.707107	2	52.75	2.05061	2	24.9	2.12132	2
IkBa	Mean	SD	N	Mean	SD	N	Mean	SD	N	Mean	SD	N
0h	86.8833	2.0074	6	86.8833	2.0074	6	86.8833	2.0074	6	86.8833	2.0074	6
1h	68.3333	5.87322	6	83.75	2.61744	6	87.7333	1.51482	6	87.7167	3.51535	6
2h	61.075	6.2088	4	79.75	3.94166	4	88.05	1.82665	4	86.575	5.24428	4
4h	71.55	0.636396	2	74.6	0.282843	2	84.35	1.76777	2	88.4	5.37401	2
6h	82.45	3.46482	2	82.75	3.60624	2	81.45	1.90919	2	94.5	1.83848	2
pLCK	Mean	SD	N	Mean	SD	N	Mean	SD	N	Mean	SD	N
0h	59.8333	6.47755	6	59.8333	6.47755	6	59.8333	6.47755	6	59.8333	6.47755	6
1h	60.6833	6.4369	6	62.8167	6.76562	6	60.4	7.04017	6	60.6333	6.03313	6
2h	57.875	1.68399	4	63.3	4.0653	4	63.85	4.82252	4	62.975	4.48061	4
4h	60.2	0	2	63.35	1.06066	2	63.2	3.67696	2	60.8	4.80833	2
6h	47.95	3.60624	2	53.85	2.47487	2	61.35	2.75772	2	64.1	4.38406	2
pSLP76	Mean	SD	N	Mean	SD	N	Mean	SD	N	Mean	SD	N
0h	4.37833	1.53067	6	4.37833	1.53067	6	4.37833	1.53067	6	4.37833	1.53067	6
1h	8.40333	2.57248	6	4.90833	1.54318	6	3.645	1.00614	6	3.81167	1.03463	6
2h	10.345	1.1112	4	4.875	1.00825	4	4.2375	0.851758	4	4.125	1.01995	4
4h	12	1.55563	2	5.45	0.947523	2	4.315	0.120208	2	3.34	0.452548	2
6h	4.62	0.0565685	2	2.635	0.190919	2	3.405	0.572756	2	3.7	0	2

## Sheet: B) Figure 4a underlying data
Supplementary File 5
Mass cytometry differential abundance analysis results plotted in Figure 4a and Figure 4 - figure supplement 1
	Differential abundance test results by hypersphere																				Marker intensities by hypersphere
Hypersphere	logFC. NP68_1	logFC. NP68_2	logFC. NP68_4	logFC. NP68_6	logFC. G4_1	logFC. G4_2	logFC. G4_4	logFC. G4_6	logFC. T4_1	logFC. T4_2	logFC. T4_4	logFC. T4_6	logFC. N4_1	logFC. N4_2	logFC. N4_4	logFC. N4_6	logCPM	F	PValue	FDR	log10 CD45	log10 CD8a	log10 pSTAT5	log10 CD44	log10 CD25	log10 pAKT	log10 pSLP76	log10 pLCK	log10 IkBa	log10 pPLCg1	log10 pERK1_2	log10 TCRb	log10 pZAP70_SYK	log10 pS6
1	-0.406267	-0.814419	-0.669377	-0.129517	-0.238989	-0.603335	-1.53803	-2.20933	-0.576365	-1.9497	-3.41748	-3.83279	-2.8057	-3.77887	-5.15798	-5.37973	15.6863	76.4032	9.08e-20	2.39e-18	2.98311	2.25248	0.101372	0.100986	0.10018	0.103293	0.101026	1.31914	1.53489	0.10017	0.176709	2.64172	0.106495	0.907681
2	-0.673895	-0.723094	-0.352816	0.0773986	-0.324006	-0.587717	-1.16277	-2.53539	-0.864224	-2.07088	-3.27538	-4.22714	-3.1701	-3.96438	-5.31998	-6.5391	15.5674	66.2806	6.98e-19	9.19e-18	3.00352	2.28341	0.817412	1.36208	0.10018	0.103293	0.494214	1.43149	1.62855	0.10017	0.103274	2.66456	0.106495	0.101254
3	-0.145489	-0.58395	-0.426742	0.064373	0.0661423	-0.485106	-1.39961	-2.12204	-0.285043	-1.79755	-3.10722	-3.69558	-2.33518	-3.64319	-4.35448	-5.02401	16.5618	105.398	8.65e-22	1.23e-19	2.99146	2.26683	0.101372	1.31101	0.436367	0.103293	0.101026	1.30317	1.49283	0.10017	0.103274	2.64557	0.106495	0.71711
4	-0.413063	-0.775634	-0.24681	0.179812	-0.218142	-0.627584	-1.22355	-1.82191	-0.698229	-1.89838	-2.57215	-2.63634	-2.67682	-3.0156	-2.81152	-3.01412	16.3907	91.3374	2.74e-21	2.72e-19	2.98274	2.24413	0.101372	1.49986	0.10018	0.103293	0.101026	1.10673	1.53479	0.10017	0.103274	2.64246	0.106495	0.101254
5	-0.396307	-0.822999	-0.550593	0.0341778	-0.131567	-0.613329	-1.56738	-2.27415	-0.575427	-2.10855	-3.42932	-3.9416	-2.96208	-4.06882	-5.22577	-6.10403	16.5574	118.694	1.54e-22	4.84e-20	2.99743	2.27763	0.101372	1.08572	0.404187	0.103293	0.101026	1.34865	1.58086	0.10017	0.103274	2.65841	0.106495	0.510073
6	-0.490411	-0.551664	-0.239366	0.169464	-0.110813	-0.471378	-1.24233	-2.41831	-0.634587	-2.02219	-3.15679	-4.02398	-2.60932	-3.85985	-4.3881	-6.84363	14.3161	53.2503	1.58e-17	1e-16	3.00868	2.30633	0.718836	1.60327	0.10018	0.65728	0.455396	1.36803	1.59185	0.10017	0.103274	2.66847	0.106495	0.101254
7	-0.858155	-0.54204	0.430876	0.510519	0.0685421	-0.208506	-0.292726	-2.2134	-0.832688	-1.59136	-3.06164	-2.9861	-3.33223	-3.15688	-3.78762	-4.19023	12.5062	34.0927	4.46e-15	9.56e-15	3.00925	2.30211	0.952968	1.77797	0.10018	0.785756	0.296754	0.671823	1.63987	0.10017	0.103274	2.66457	0.106495	0.101254
8	-0.301324	-0.533034	0.0776081	0.13024	-0.316426	-0.697832	-0.875995	-0.895943	-0.40689	-1.46075	-1.25217	-1.12374	-1.59395	-1.34062	-0.776492	-0.967846	13.4094	6.38903	6.24e-06	6.39e-06	2.92363	2.10682	0.101372	1.33449	0.10018	0.103293	0.465314	0.101889	1.29571	0.10017	0.375442	2.60358	0.106495	0.101254
9	-0.80418	-0.263974	-0.196422	0.216717	-0.13117	-0.199318	-0.408958	-2.03746	-0.798538	-1.35386	-2.65104	-3.91956	-2.80166	-3.48976	-4.36488	-6.34415	14.4328	37.5105	2.16e-15	5.23e-15	3.01169	2.30135	1.15875	1.65151	0.10018	0.103293	0.238802	1.35694	1.60427	0.10017	0.103274	2.66611	0.747262	0.812627
10	-0.0769118	-0.296329	-0.419371	-0.0475452	-0.0416386	-0.48998	-1.22727	-1.81624	-0.210765	-1.44674	-2.80392	-3.06755	-1.60773	-2.85725	-3.31498	-4.17748	15.6789	41.9195	4.59e-16	1.37e-15	2.98701	2.2535	0.101372	1.5298	0.10018	0.103293	0.101026	1.31363	1.27841	0.10017	0.503115	2.64675	0.106495	0.847209
11	-0.420416	-0.0755926	0.0289827	0.101487	-0.123825	-0.0933197	-0.252902	-1.66848	-0.525951	-0.958588	-2.11225	-3.32837	-1.92784	-2.68872	-3.84506	-5.00697	15.6825	40.5254	7.36e-16	2e-15	3.00425	2.26766	1.08949	1.49796	0.10018	0.103293	0.198786	1.26651	1.43705	0.10017	0.103274	2.65543	0.106495	1.13468
12	-0.585365	-0.0946255	-0.0248624	0.0634386	-0.167213	-0.12348	-0.340087	-1.84451	-0.688282	-1.09976	-2.41675	-3.66053	-2.33521	-3.01831	-4.25096	-5.56555	15.8501	42.7092	3.53e-16	1.12e-15	3.00681	2.28828	1.16899	1.40753	0.10018	0.103293	0.101026	1.33207	1.48777	0.10017	0.258272	2.66093	0.106495	1.00753
13	-0.494193	-0.519106	-0.0666966	0.0690238	-0.275311	-0.528808	-0.865023	-2.07354	-0.867082	-1.65433	-2.82127	-3.3971	-2.60302	-3.3009	-3.83715	-4.55909	16.542	121.066	4.15e-23	1.84e-20	2.99231	2.27032	0.775479	1.34429	0.10018	0.103293	0.101026	1.19738	1.47779	0.111421	0.103274	2.64724	0.106495	0.101254
14	0.242353	0.500739	0.120397	-0.412416	-0.0623701	-0.0734762	-0.172709	-0.277221	0.267661	0.47876	0.290198	0.0332403	1.02155	1.37319	1.1379	0.542315	15.8917	7.35522	1.7e-06	1.75e-06	2.82424	2.10431	0.101372	0.853658	0.10018	0.103293	0.101026	0.101889	0.100977	0.10017	0.103274	2.58522	0.106495	0.776897
15	0.0750716	0.323353	0.327618	-0.386907	-0.332874	-0.170064	-0.0978423	-0.260507	-0.0552798	0.400475	0.498462	0.0926358	0.837261	1.37654	1.39486	0.547547	16.2579	9.60342	9e-08	9.51e-08	2.81467	2.0823	0.101372	0.619217	0.10018	0.103293	0.101026	0.101889	0.100977	0.10017	0.103274	2.57842	0.106495	0.101254
16	-0.335799	-0.756936	-0.379257	0.0757697	-0.156982	-0.686309	-1.50671	-1.99803	-0.556002	-2.02831	-2.92315	-3.23233	-2.65361	-3.64033	-3.70501	-3.98581	15.5603	88.6607	4.26e-21	3.53e-19	2.98281	2.24837	0.101372	1.26445	0.10018	0.103293	0.101026	1.13533	1.51248	0.281421	0.534837	2.64375	0.106495	0.101254
17	-0.591141	-0.487383	-0.380101	-0.266487	-0.536742	-0.634208	-0.840939	-2.05053	-0.834652	-1.72742	-3.07921	-3.8372	-2.19383	-3.14807	-4.77009	-5.35667	14.945	58.3554	3.19e-18	3.01e-17	2.98739	2.25194	0.839629	0.45609	0.10018	0.103293	0.778052	1.31817	1.32692	0.10017	0.103274	2.64517	0.106495	0.101254
18	-0.22143	0.0157383	-0.250805	-0.023044	-0.0818359	-0.239815	-0.72954	-2.16662	-0.294679	-1.35404	-2.68254	-3.80219	-1.53825	-2.86767	-3.95366	-5.7693	14.087	37.8116	1.93e-15	4.74e-15	2.99939	2.28463	0.946137	1.48041	0.10018	0.103293	0.75679	1.24866	1.32559	0.10017	0.878054	2.65348	0.106495	0.794594
19	-0.599786	-0.327808	0.168493	0.20654	-0.18643	-0.275724	-0.446063	-2.01747	-0.833994	-1.35329	-2.51136	-3.52815	-2.63379	-3.15332	-4.26195	-5.32282	16.1343	69.907	3.25e-19	5.29e-18	2.99789	2.25499	1.10109	1.51778	0.10018	0.103293	0.101026	1.23969	1.54918	0.10017	0.103274	2.65249	0.106495	0.863357
20	0.164803	0.413458	0.329979	-0.137528	-0.124857	-0.096655	-0.0583458	-0.199197	0.0994459	0.33497	0.283085	0.0464903	0.737858	1.15526	1.17059	0.519447	16.5361	6.70197	4.49e-06	4.61e-06	2.83491	2.10518	0.101372	1.15422	0.10018	0.103293	0.101026	0.101889	0.100977	0.10017	0.103274	2.58662	0.106495	0.389796
21	-0.667786	-0.28451	-0.0360656	-0.110944	-0.48255	-0.301988	-0.308506	-1.71501	-0.802273	-1.26854	-2.728	-4.01033	-2.20516	-2.7726	-4.58952	-5.60201	14.376	46.1889	8.7e-17	3.7e-16	2.98293	2.22795	1.16866	0.100986	0.10018	0.103293	0.269641	1.30582	1.36817	0.10017	0.499359	2.64553	0.585504	0.670774
22	-0.61852	-0.68406	-0.147652	0.129281	-0.274233	-0.582233	-1.0324	-2.29703	-0.889603	-1.89015	-3.02018	-3.92822	-3.02593	-3.69493	-4.73389	-5.32427	16.6159	107.268	6.7e-22	1.07e-19	2.99806	2.27538	0.78603	1.39787	0.10018	0.103293	0.101026	1.29017	1.60407	0.10017	0.103274	2.65526	0.106495	0.101254
23	-0.526977	-0.261623	-0.23362	-0.194579	-0.481534	-0.541565	-0.810439	-2.01233	-0.828202	-1.47869	-3.09454	-3.95407	-2.17772	-3.12358	-4.56202	-5.63342	14.1716	55.7721	3.84e-18	3.44e-17	2.99147	2.291	0.880675	0.100986	0.10018	0.513345	0.101026	1.27872	1.28698	0.10017	0.103274	2.64952	0.337744	0.101254
24	-0.119803	-0.402806	-0.648603	0.326515	0.27752	-0.246625	-1.42203	-2.00267	-0.15975	-1.80258	-3.15818	-3.87848	-2.51052	-3.97143	-4.65253	-6.21503	14.0257	59.1856	1.62e-18	1.8e-17	2.99541	2.27923	0.101372	1.42689	0.10018	0.103293	0.622472	1.32707	1.56875	0.861604	0.103274	2.65266	0.106495	0.945225
25	-0.0944635	-0.338167	-0.118436	0.228551	-0.0427303	-0.339661	-0.872315	-1.25096	-0.259788	-1.12511	-1.84599	-1.94355	-1.57648	-1.73148	-1.48866	-1.53848	15.0726	23.6085	7.32e-13	9.84e-13	2.95816	2.19169	0.101372	1.31459	0.10018	0.103293	0.101026	0.502696	1.37553	0.10017	0.103274	2.61711	0.106495	1.08214
26	-0.907049	-0.671139	-0.508432	-0.0411504	-0.541499	-0.457421	-1.0998	-2.49881	-0.894511	-1.82665	-3.11217	-4.81827	-3.09554	-3.92779	-4.93178	-6.5494	14.4262	72.5483	8.2e-20	2.28e-18	3.00143	2.28808	1.00445	0.100986	0.318605	0.103293	0.761208	1.33331	1.63026	0.10017	0.103274	2.65541	0.523026	0.721136
27	-0.708759	-0.611988	-0.314223	0.179469	-0.299916	-0.468354	-1.09248	-2.45573	-0.842457	-1.90173	-3.14251	-4.19384	-3.16372	-3.81384	-5.00673	-6.31694	15.6477	61.7004	1.94e-18	2.08e-17	3.01447	2.29911	0.869671	1.32128	0.10018	0.103293	0.118916	1.4014	1.65828	0.10017	0.103274	2.6715	0.106495	1.00259
28	-0.337972	-0.461561	0.136477	0.150299	0.00747805	-0.143361	-0.663438	-2.14205	-0.437302	-1.35318	-2.47095	-3.65355	-2.58646	-3.17083	-4.4579	-5.4588	14.6633	45.2447	1.57e-16	6.01e-16	2.99113	2.24708	1.03375	0.100986	1.00785	0.103293	0.101026	1.27673	1.57904	0.10017	0.103274	2.64112	0.106495	1.00373
29	0.0260784	-0.586557	-0.718047	0.349499	0.267001	-0.147403	-1.38021	-2.47353	0.128904	-1.84056	-3.41441	-3.77004	-2.25076	-3.78337	-4.4598	-6.0012	13.0749	42.296	2.08e-16	7.41e-16	2.98364	2.22514	0.101372	1.26793	0.10018	0.680123	0.82802	1.31621	1.64185	0.10017	0.103274	2.62732	0.106495	1.10207
31	0.239186	0.286346	-0.296195	-0.782363	-0.332189	-0.191472	-0.356627	-1.17474	0.106587	-0.687577	-1.81983	-2.54898	-0.345132	-1.57573	-3.19125	-3.87051	12.7262	16.806	7.42e-11	8.47e-11	2.98928	2.2538	0.801217	0.100986	0.772474	0.103293	0.101026	1.3713	0.367554	0.10017	0.103274	2.63352	0.106495	1.15977
32	-0.208014	-0.37186	-0.51795	-0.0320266	0.014884	-0.328057	-1.10832	-1.59768	-0.268304	-1.3593	-2.67734	-3.3734	-2.1812	-3.35642	-4.09138	-5.02091	14.7997	42.7661	3.47e-16	1.11e-15	2.99157	2.2631	0.101372	1.24561	0.10018	0.103293	0.101026	1.22595	1.38243	0.10017	0.103274	2.64803	0.687948	1.08885
33	0.225268	1.98268	0.465999	-1.35434	-0.228302	1.92086	2.76015	3.64399	0.511791	3.07574	2.62853	3.22155	0.284958	1.38477	0.946798	2.49322	13.3351	21.4506	4.23e-12	5.19e-12	3.06114	2.21297	0.810542	0.974991	0.10018	0.103293	0.101026	0.434542	1.37477	0.10017	0.103274	2.6156	0.106495	2.98217
34	2.46509	3.34844	1.96933	-2.01759	1.69961	3.21349	3.89535	4.46825	2.83144	4.89297	4.79644	4.15907	4.42507	4.56325	4.65464	3.78183	13.7305	25.8915	3.45e-13	4.89e-13	3.0977	2.29381	1.4364	1.68051	0.722157	0.906499	0.101026	1.48758	1.44836	0.10017	1.4121	2.68443	0.140954	3.24899
35	-0.125465	-0.164338	-0.376876	-0.137413	-0.0772461	-0.4515	-1.08501	-2.03932	-0.243227	-1.48995	-2.88509	-3.74961	-1.69177	-3.06006	-4.75213	-5.68803	15.4172	64.2538	1.09e-18	1.34e-17	2.98979	2.28518	0.511907	0.9005	0.756721	0.103293	0.592824	1.33007	1.27204	0.10017	0.103274	2.64809	0.106495	0.950807
36	0.122426	-0.388166	-0.573605	0.106868	0.377541	-0.241869	-1.55183	-2.21115	0.180788	-1.74107	-2.91657	-4.02131	-2.12714	-3.53279	-4.40533	-5.66139	14.9193	50.9315	2.96e-17	1.63e-16	2.98966	2.2608	0.101372	1.3903	0.801975	0.103293	0.615114	1.29668	1.51047	0.10017	0.659917	2.63986	0.106495	0.933394
37	-0.00607018	-0.483585	-0.507291	0.288168	0.370969	-0.251819	-1.58167	-1.90359	0.0332955	-1.76919	-3.05096	-4.01239	-2.45086	-3.801	-5.1338	-5.97238	13.9791	50.3753	2.89e-17	1.6e-16	2.98598	2.24418	0.101372	1.51104	0.10018	0.0969104	0.101026	1.32878	1.60221	0.714462	0.871138	2.64426	0.129404	0.798154
38	-0.513328	-0.248232	-0.390124	0.234348	0.229952	-0.182715	-1.2206	-2.95208	-0.384102	-1.43943	-3.08609	-5.55999	-3.01527	-4.15171	-5.93853	-7.29895	12.2208	31.5116	2.39e-14	4.17e-14	2.9953	2.29348	1.08834	0.907748	0.675624	0.0969104	0.745011	1.50094	1.67076	0.354865	1.04215	2.65303	0.529278	0.101254
39	-0.890739	-0.736998	0.0355355	0.0580358	-0.456306	-0.54191	-0.668216	-2.21335	-1.21571	-1.77061	-2.8662	-3.7701	-3.43327	-3.47228	-4.89662	-5.50141	15.2264	72.24	2.03e-19	4.02e-18	2.99142	2.23206	1.09361	1.03714	0.10018	0.103293	0.101026	1.08679	1.62117	0.10017	0.103274	2.64619	0.400321	0.101254
40	-0.550889	-0.55321	-0.167445	-0.0718957	-0.4122	-0.519591	-0.863249	-2.12975	-0.836317	-1.61449	-2.90148	-3.81334	-2.61626	-3.2086	-4.59425	-4.92966	16.3714	91.4018	6.83e-21	4.85e-19	2.98647	2.26107	0.841219	0.100986	0.10018	0.103293	0.101026	1.24924	1.48825	0.10017	0.103274	2.64044	0.106495	0.92146
41	-0.310306	-0.747331	-0.482495	0.0245494	-0.126829	-0.645992	-1.47076	-2.25587	-0.514148	-2.07552	-3.25624	-3.70196	-2.62338	-3.8648	-4.55596	-5.17974	16.6511	115.713	2.23e-22	6e-20	2.99008	2.26757	0.101372	1.31509	0.374345	0.103293	0.101026	1.32644	1.53239	0.10017	0.103274	2.648	0.106495	0.131642
42	-0.609193	-0.688227	-0.832217	-0.126835	-0.268614	-0.597101	-1.56234	-2.65073	-0.550699	-2.19716	-3.66931	-4.65286	-3.04161	-4.13572	-5.22302	-6.79132	14.1017	58.1157	2.84e-18	2.73e-17	2.99739	2.29338	0.559764	1.33883	0.10018	0.103293	0.921393	1.4733	1.62874	0.10017	0.6422	2.65909	0.106495	0.543967
43	-0.0164505	0.322763	0.0826899	-0.532342	-0.12638	-0.120403	-0.0180458	-1.09567	0.101689	-0.458731	-1.58769	-2.47726	-0.423951	-1.53817	-2.70661	-3.34058	13.9662	18.2843	3.41e-11	3.92e-11	2.97345	2.18658	0.960944	1.3312	0.10018	0.103293	0.101026	1.30168	0.415246	0.10017	0.31934	2.6252	0.259618	0.959513
44	-0.526938	-0.892302	-0.211565	0.0850022	-0.51249	-0.76707	-1.08782	-1.4868	-0.952444	-1.74774	-2.0763	-2.00696	-2.44128	-2.21499	-1.86077	-1.8276	15.8234	27.0333	1.27e-13	1.93e-13	2.9561	2.21266	0.101372	0.100986	0.10018	0.103293	0.101026	0.623643	1.46634	0.10017	0.103274	2.62122	0.106495	0.169794
45	-0.377126	-0.0331878	0.127382	0.0813675	-0.189095	-0.237672	-0.283614	-1.69391	-0.621493	-1.02442	-2.21004	-3.08211	-1.85455	-2.55736	-3.46013	-4.39892	16.135	49.2187	4.81e-17	2.36e-16	2.99134	2.26605	1.02785	1.4972	0.10018	0.103293	0.101026	1.17211	1.30769	0.10017	0.167285	2.64714	0.106495	0.906554
46	-0.438249	-0.342207	-0.612466	0.183777	0.0523457	-0.191616	-1.11987	-1.98375	-0.449812	-1.67504	-3.09309	-3.96676	-2.68089	-3.91914	-4.86764	-6.51348	14.5369	66.3077	3.55e-19	5.63e-18	3.01328	2.31445	0.287262	1.41735	0.10018	0.103293	0.201606	1.28024	1.55952	0.10017	0.103274	2.67275	0.685378	1.10128
47	-0.620295	-0.746724	-0.158725	0.0292672	-0.417203	-0.655465	-1.06542	-2.21644	-0.973665	-1.91312	-2.94616	-3.47914	-2.93007	-3.43768	-4.10237	-4.27688	16.9403	158.213	7.57e-25	2.27e-21	2.98841	2.25419	0.696438	1.01577	0.10018	0.103293	0.101026	1.18078	1.55025	0.10017	0.103274	2.64168	0.106495	0.101254
48	-0.320224	-0.0487666	-0.0345023	-0.236558	-0.44933	-0.243276	-0.264198	-1.49429	-0.624499	-0.915694	-2.23534	-3.04676	-1.49218	-2.33943	-3.64994	-4.56299	14.2315	26.8466	2.12e-13	3.08e-13	2.98554	2.24336	1.04268	0.100986	0.10018	0.209107	0.101026	1.23414	1.10091	0.10017	0.103274	2.6354	0.127231	1.02009
49	-0.31601	-0.647106	-0.310339	0.134608	-0.159708	-0.542196	-1.16192	-1.80978	-0.579183	-1.70772	-2.63389	-2.81384	-2.37015	-2.95995	-2.97879	-3.20033	16.8926	116	7.85e-23	3.16e-20	2.97869	2.23917	0.101372	1.23498	0.10018	0.103293	0.101026	1.13335	1.49117	0.10017	0.103274	2.63948	0.106495	0.79222
51	-0.406829	-0.78137	-0.440192	-0.132272	-0.357315	-0.751616	-1.28418	-1.91859	-0.723841	-1.83372	-2.65744	-2.81911	-2.25757	-2.58117	-2.83056	-3.09484	16.5514	77.183	3.3e-20	1.2e-18	2.96754	2.22827	0.101372	0.100986	0.10018	0.103293	0.101026	1.16961	1.41113	0.10017	0.103274	2.63064	0.106495	0.236911
53	0.102114	0.372278	-0.324517	-0.292888	-0.174323	-0.24186	-0.252357	-1.40692	0.0712601	-0.776191	-2.25051	-3.7835	-0.583172	-1.86207	-3.34991	-3.77988	13.5089	25.4345	2.94e-13	4.24e-13	2.99615	2.27563	0.851686	1.18882	0.10018	0.103293	0.88365	1.3509	0.774942	0.10017	0.103274	2.64357	0.106495	1.07676
54	0.0617936	-0.00886661	-0.423691	-0.838402	-0.304175	-0.548856	-0.877028	-1.35872	-0.0873062	-0.712797	-1.51894	-1.80911	-0.221414	-0.586243	-1.19393	-1.71533	15.5888	9.4252	1.11e-07	1.18e-07	2.93127	2.19753	0.101372	0.617164	0.10018	0.103293	0.101026	1.11834	0.100977	0.10017	0.103274	2.61768	0.106495	0.750404
55	0.0716942	0.0864244	-0.30078	-0.75749	-0.224667	-0.576722	-0.924546	-1.32148	-0.00959872	-0.826031	-1.72642	-1.77582	-0.470593	-1.12328	-1.24573	-1.95114	14.6196	11.4267	1.18e-08	1.26e-08	2.94992	2.21513	0.101372	1.56804	0.10018	0.103293	0.101026	1.20889	0.215223	0.10017	0.154426	2.62421	0.106495	0.101254
56	3.30561	2.96255	2.34801	-1.19355	1.82183	3.42429	4.48416	3.35196	3.75048	5.51921	5.46947	2.91335	6.07478	6.97112	5.57505	2.01403	12.5806	33.3327	1.1e-14	2.12e-14	3.05809	2.19823	1.58751	1.59546	0.10018	0.196269	0.101026	1.37286	0.100977	0.10017	1.97262	2.67011	0.802688	3.15907
57	2.34143	1.84067	0.44358	-7.41866	1.21142	2.21962	2.64687	2.93762	2.47601	3.78219	2.97953	2.49879	4.60053	4.43121	2.92561	2.04035	13.7966	31.4359	5.5e-14	8.86e-14	3.03622	2.2097	0.540412	0.100986	0.10018	0.103293	0.101026	1.39064	1.09043	0.10017	1.608	2.62827	0.106495	3.10267
58	2.64258	2.73033	2.64959	-5.61877	1.9113	3.06502	4.39376	2.66742	3.11808	4.59296	5.14375	1.74095	5.19396	6.21858	5.99903	2.70935	13.3492	48.9493	1.41e-16	5.54e-16	3.08764	2.23728	1.76585	1.58994	0.10018	0.103293	0.920555	1.44392	1.16963	0.10017	2.00067	2.68597	0.106495	3.22912
59	0.0828852	0.219118	0.274347	-0.420901	-0.31874	-0.276598	-0.163672	-0.272248	-0.0484562	0.345129	0.47926	0.121078	0.89876	1.43201	1.38824	0.671537	15.9348	9.17989	1.5e-07	1.57e-07	2.80882	2.05177	0.101372	0.100986	0.10018	0.103293	0.101026	0.101889	0.100977	0.10017	0.103274	2.56486	0.106495	0.101254
60	2.26017	2.19073	0.197071	-2.81578	1.07489	2.43817	2.71001	2.73884	2.67957	4.08797	3.15529	1.59531	4.31952	4.42449	2.6275	0.421353	13.7706	44.711	1.14e-16	4.68e-16	3.05068	2.2678	0.901102	1.38952	0.10018	0.103293	0.186799	1.23203	0.955473	0.604703	1.70923	2.68818	0.64653	3.11883
61	-0.0259181	0.0675229	0.227739	-0.288823	-0.359143	-0.357713	-0.283187	-0.418909	-0.183758	0.130611	0.213548	-0.106171	0.549854	1.1089	1.07804	0.388811	16.1471	6.30818	8.31e-06	8.51e-06	2.82013	2.07679	0.101372	0.100986	0.10018	0.103293	0.101026	0.101889	0.100977	0.10017	0.103274	2.57005	0.106495	0.101254
62	3.16057	1.48777	0.343776	-2.84722	2.13982	2.20609	1.9642	0.918555	3.40499	3.27396	2.00199	-0.946595	4.91138	4.27232	1.86235	-1.05501	12.75	40.5519	7.29e-16	1.98e-15	3.04737	2.26612	0.101372	1.28596	0.10018	0.103293	0.101026	1.50438	1.07784	0.798866	2.03191	2.6924	0.106495	3.09151
63	0.219447	0.436149	0.301583	-0.344177	-0.109686	-0.125153	-0.0799987	-0.152938	0.210458	0.52946	0.551235	0.236698	1.03733	1.4791	1.44485	0.815646	16.3625	10.2439	4.28e-08	4.54e-08	2.80869	2.05983	0.101372	0.743272	0.10018	0.103293	0.101026	0.101889	0.100977	0.10017	0.103274	2.56639	0.106495	0.435085
65	0.234157	0.577852	0.557603	-0.135984	-0.0673973	0.0236569	0.182335	0.0387908	0.2525	0.588772	0.770539	0.414898	1.02532	1.536	1.67227	0.907594	16.1593	10.0151	5.56e-08	5.87e-08	2.81973	2.06759	0.101372	1.26164	0.10018	0.103293	0.101026	0.101889	0.100977	0.10017	0.103274	2.57312	0.106495	0.101254
67	3.70107	2.64134	1.7213	-5.82903	2.36139	2.87314	3.32753	2.92875	3.84804	4.51366	4.09495	2.10742	6.3594	6.10934	3.97749	1.26521	13.4119	45.3406	4e-16	1.23e-15	3.02352	2.17448	0.39148	1.45852	0.10018	0.768799	0.101026	1.28585	0.100977	0.10017	1.81099	2.64669	0.106495	3.03716
68	3.30229	1.87419	0.472638	-2.65027	2.11146	2.34798	3.02285	1.85309	3.67886	4.2202	3.61739	1.35993	6.10498	5.80563	3.64685	1.13866	13.0736	42.5441	3.73e-16	1.16e-15	3.03848	2.16406	0.101372	1.36921	0.10018	0.118055	0.101026	1.34609	0.100977	0.10017	1.95001	2.65979	0.472528	3.10811
69	0.16765	0.583663	0.387239	-0.220112	-0.132671	0.032292	0.0326552	-0.0103415	0.201698	0.522873	0.583299	0.3184	0.933885	1.41994	1.51352	0.815485	15.6741	9.01472	1.84e-07	1.93e-07	2.82536	2.09619	0.101372	1.29507	0.10018	0.103293	0.101026	0.101889	0.100977	0.10017	0.103274	2.58934	0.106495	0.101254
70	2.65354	1.2947	-0.435018	-3.09756	1.98469	2.3064	2.09486	0.787889	3.04777	2.81232	1.84633	0.391363	4.92519	4.16833	3.01941	1.54643	12.4486	44.7185	9.35e-17	3.91e-16	3.06221	2.25355	0.101372	0.591688	0.701999	0.103293	1.11785	1.28856	1.45201	0.10017	2.00695	2.68683	0.106495	3.16062
71	0.17205	0.315593	0.209817	-0.447394	-0.186951	-0.196868	-0.214762	-0.332249	0.0735088	0.408504	0.385517	0.0668961	0.942086	1.39387	1.24569	0.598566	15.9411	8.56259	3.28e-07	3.41e-07	2.81282	2.06956	0.101372	0.100986	0.10018	0.103293	0.101026	0.101889	0.100977	0.10017	0.103274	2.57429	0.106495	0.435095
72	0.935858	0.878836	0.123684	-0.299619	0.0679838	0.255022	-0.0159761	0.170698	0.870267	0.715776	0.249786	0.253479	1.33364	1.22088	0.935365	1.16596	12.3908	4.09106	0.000419366	0.000422443	2.85966	2.09283	0.101372	1.02844	0.10018	0.103293	0.101026	0.101889	0.100977	0.431165	0.793669	2.58171	0.106495	1.21924
73	3.01488	2.01087	0.763268	-3.29975	1.73719	2.3295	3.11126	3.14518	3.53881	4.13705	3.72903	2.29033	5.74828	5.40558	4.07659	2.769	12.7755	25.5129	4.2e-13	5.93e-13	3.05775	2.22786	0.101372	1.09988	0.896285	0.103293	0.76648	1.44168	0.100977	0.10017	1.75288	2.67579	0.106495	3.1638
74	3.71747	1.58091	0.816789	-3.70477	2.48194	2.54986	2.66261	1.86804	3.83138	3.7611	2.54387	0.331826	5.55049	4.75789	3.18112	1.30642	12.805	39.8775	9.21e-16	2.45e-15	3.04725	2.22408	0.101372	0.100986	0.878481	0.103293	0.101026	1.47387	1.14544	0.10017	2.03496	2.6842	0.106495	3.12908
75	2.79309	2.51931	1.97245	-2.32251	1.85734	2.91929	3.72484	3.25316	3.32494	4.43366	4.87754	3.91172	5.11587	5.51258	6.1654	4.65316	13.1864	37.7849	1.95e-15	4.75e-15	3.07868	2.17581	1.57619	1.57154	1.05404	0.242181	0.101026	1.38293	1.19505	0.650645	1.84481	2.59107	0.106495	3.25128
76	3.80093	2.84136	1.05512	-2.64725	2.86624	3.07885	2.94846	2.06287	4.49669	4.43364	3.62128	1.89858	6.33442	5.521	4.81888	3.04825	12.5461	34.2823	7.5e-15	1.53e-14	3.05153	2.21972	0.118444	1.47866	0.902963	0.797133	0.801866	1.35262	1.33945	0.961595	2.01674	2.67047	0.464411	3.19107
77	2.92796	1.49987	-0.0134844	-3.27226	1.89921	2.32061	2.21109	1.06006	3.41524	3.12967	1.96771	-0.00539577	5.04304	4.10803	2.82869	1.0171	13.2253	46.6066	5.99e-17	2.82e-16	3.06584	2.28046	0.101372	0.819687	0.813817	0.103293	0.882566	1.50725	1.34928	0.10017	2.03226	2.70979	0.106495	3.17719
78	4.25889	2.96604	1.77918	-1.75564	2.37956	2.75488	3.64231	2.9106	4.56934	4.71633	4.68849	2.50969	7.12262	6.72329	6.03729	4.11294	12.4354	45.9123	1.28e-16	5.1e-16	3.06185	2.19665	0.101372	1.75862	0.610382	0.450373	0.963224	1.406	0.100977	0.57107	1.91799	2.65221	0.106495	3.17597
79	-0.362648	-0.146163	0.36348	0.297137	0.047855	-0.418619	-0.172668	-1.54571	-0.65046	-1.33712	-2.50262	-3.21749	-2.00616	-2.8107	-3.12887	-4.06425	12.2111	26.2237	1.73e-13	2.55e-13	2.98233	2.22902	1.05112	1.57567	0.10018	0.5559	0.101026	0.32096	1.51802	0.10017	0.832734	2.63599	0.106495	0.101254
80	0.231855	0.335458	0.255439	-0.427693	-0.115029	-0.18795	-0.155751	-0.260255	0.185513	0.514567	0.541588	0.241942	1.11067	1.5805	1.43402	0.849116	15.7637	10.5512	3.03e-08	3.23e-08	2.79774	2.03004	0.101372	0.100986	0.10018	0.103293	0.101026	0.101889	0.100977	0.10017	0.103274	2.55813	0.106495	0.51588
82	0.153014	0.202446	0.205886	-0.558836	-0.218555	-0.284219	-0.215297	-0.422925	0.0455016	0.327755	0.388567	-0.00455596	0.889863	1.38333	1.24483	0.515585	15.7508	8.87033	2.21e-07	2.31e-07	2.81246	2.04066	0.101372	0.100986	0.10018	0.103293	0.101026	0.101889	0.100977	0.10017	0.103274	2.56219	0.106495	0.154878
83	0.357851	0.634875	0.361375	-0.231704	0.027189	0.11586	0.107427	0.0596453	0.467816	0.694224	0.566435	0.296831	1.12864	1.49952	1.51807	0.96104	15.6348	8.45101	3.79e-07	3.92e-07	2.82051	2.08291	0.101372	1.34156	0.10018	0.103293	0.101026	0.101889	0.100977	0.10017	0.103274	2.57298	0.106495	0.756446
84	3.83267	3.382	2.35923	-1.8694	2.65734	3.58574	4.18141	3.69529	4.34562	5.25855	5.042	3.0427	6.8501	6.66969	5.33369	3.09929	13.293	30.8266	3.23e-14	5.45e-14	3.06023	2.22633	1.01148	1.6495	0.743311	0.937115	0.101026	1.38187	0.100977	0.295177	1.92243	2.67817	0.106495	3.17186
85	3.08193	2.63101	2.25981	-2.01542	2.19689	3.23769	4.44687	2.7536	3.3602	4.72123	5.00195	1.37928	5.56546	6.14188	5.21071	1.66554	14.0366	53.4041	1.51e-17	9.81e-17	3.06981	2.22864	1.61504	0.86563	0.10018	0.103293	0.882155	1.39833	1.0209	0.10017	2.01393	2.70128	0.120544	3.18093
86	0.143664	0.549702	0.571789	-0.329886	-0.189515	-0.00841823	0.16344	-0.0517426	0.162719	0.711432	0.907422	0.336781	1.1267	1.72646	1.78985	0.777734	15.4543	12.7795	3.07e-09	3.35e-09	2.80828	2.06835	0.101372	0.945068	0.10018	0.103293	0.101026	0.101889	0.100977	0.10017	0.103274	2.57475	0.106495	0.101254
87	0.268508	1.14618	0.468817	0.237284	0.476093	1.39333	1.62275	1.79293	0.450252	1.45646	1.44907	1.49247	-0.736638	-1.06847	-0.251987	0.82027	13.5686	10.5316	3.1e-08	3.29e-08	3.0459	2.22168	1.26024	1.5428	1.06522	0.103293	0.101026	1.18898	1.5943	0.10017	0.103274	2.63894	0.106495	2.52941
88	0.06012	-0.225717	-0.37082	0.170571	0.281454	-0.139705	-1.00193	-1.5451	-0.00447834	-1.24952	-2.5591	-2.97898	-1.77207	-3.01766	-3.34166	-3.91267	14.9665	44.579	1.94e-16	7.06e-16	2.98921	2.24209	0.101372	1.52365	0.10018	0.103293	0.101026	1.1059	1.4268	0.312454	0.458281	2.64031	0.226272	1.12442
89	3.16679	1.94283	0.548757	-4.1107	1.91876	2.46756	2.53676	1.86242	3.40564	3.60121	2.941	1.10041	5.22079	4.82752	3.11506	0.758784	13.8737	48.837	5.36e-17	2.6e-16	3.05434	2.25335	0.101372	1.64201	0.10018	0.103293	0.283315	1.33405	0.740714	0.10017	1.91238	2.67856	0.106495	3.07676
92	3.17487	3.03154	2.63184	-4.08013	1.83267	3.74811	4.19922	2.95854	4.05642	5.05493	5.46481	2.7492	5.76185	6.43227	6.41792	3.50095	12.2457	28.6765	1.85e-13	2.71e-13	3.09374	2.24979	1.57371	1.81948	0.75355	0.103293	0.912945	1.43666	0.468449	0.865017	1.98452	2.69403	0.809904	3.22889
93	3.22341	1.88342	0.737994	-2.20443	2.16082	2.45055	2.44901	1.4282	3.65145	3.39041	2.46116	0.540168	5.41788	4.56484	3.63305	1.72662	13.2353	33.6639	9.64e-15	1.89e-14	3.05194	2.23087	0.101372	1.41102	0.167742	0.21543	0.98159	1.31943	1.47763	0.10017	1.97941	2.66567	0.106495	3.14285
94	-0.155591	1.97683	1.69254	-2.96721	-0.404809	1.77138	3.94544	5.52868	0.369356	3.85071	5.30152	5.20022	0.676529	3.13545	4.00945	4.49205	13.3068	41.9211	4.58e-16	1.37e-15	3.10006	2.21696	1.58425	0.100986	0.71762	0.103293	0.101026	1.13287	0.191812	0.10017	0.103274	2.59535	0.106495	3.20439
95	-0.0247235	0.0489143	0.492327	0.211197	-0.16522	-0.216705	-0.196086	-0.203694	-0.27234	-0.188998	-0.0324948	-0.211358	-0.197393	0.371152	0.690539	-0.0115057	15.1247	2.35108	0.0212411	0.0212551	2.88046	2.14585	0.101372	1.53438	0.10018	0.103293	0.101026	0.101889	0.773129	0.10017	0.103274	2.61473	0.106495	0.101254
96	0.524324	2.38387	1.81574	-0.980471	0.285864	2.32176	4.13761	5.7516	0.468296	4.4692	5.65765	6.08305	1.1047	3.05082	4.77379	5.61307	13.9389	61.5701	2e-18	2.08e-17	3.11235	2.18666	1.53284	1.04662	1.11464	0.103293	0.101026	1.23411	0.901515	0.245131	0.234565	2.55717	0.15154	3.28667
97	3.28095	2.11617	0.811985	-3.47561	2.33723	2.50605	2.70713	1.74298	3.84521	3.56352	3.07221	-0.537339	5.95388	5.1239	3.69737	0.93909	13.6146	50.097	3.74e-17	1.97e-16	3.05252	2.24106	0.101372	1.37087	0.10018	0.103293	1.02473	1.44234	1.05027	0.10017	2.01545	2.68884	0.106495	3.14641
100	0.0463838	0.230754	0.279213	-0.424695	-0.351681	-0.286535	-0.149467	-0.351428	-0.0903094	0.322613	0.388627	0.0447843	0.811973	1.34661	1.25552	0.493023	15.9214	7.89695	7.95e-07	8.19e-07	2.81047	2.06829	0.101372	0.100986	0.10018	0.103293	0.101026	0.101889	0.100977	0.10017	0.103274	2.5718	0.106495	0.101254
101	3.49103	3.16516	3.80339	-0.53348	2.5678	3.73125	5.12678	3.51771	3.55222	5.20148	6.11007	3.70102	5.71535	6.68099	7.19842	4.86961	12.3095	29.907	4.88e-14	7.96e-14	3.10669	2.27019	1.84151	1.58045	0.955222	0.813269	1.07287	1.33077	1.41218	0.10017	2.00012	2.68802	0.106495	3.27909
102	0.215564	0.565725	0.525448	-0.0862782	-0.0692337	0.0102254	0.180577	0.0449475	0.208424	0.548727	0.701608	0.383864	0.91398	1.43376	1.61178	0.896836	15.9519	7.98264	7.07e-07	7.29e-07	2.82159	2.07897	0.101372	1.37032	0.10018	0.103293	0.101026	0.101889	0.100977	0.10017	0.103274	2.57594	0.106495	0.101254
103	-0.667393	-0.203042	0.214363	0.138763	-0.280419	-0.213121	-0.41498	-1.85722	-0.8508	-1.28862	-2.46045	-3.93678	-2.76819	-3.32831	-4.26273	-5.89589	15.7558	48.4347	6.03e-17	2.83e-16	3.00732	2.29605	1.27694	1.01838	0.43108	0.103293	0.101026	1.40772	1.5327	0.10017	0.228529	2.66332	0.106495	0.805768
104	2.6462	2.48428	1.50562	-1.99497	1.89001	2.71624	3.4723	2.14274	3.13213	4.22905	3.97019	1.26035	5.15055	5.12684	4.39625	1.81599	13.9974	46.2627	1.15e-16	4.68e-16	3.06127	2.24042	1.38843	1.218	0.10018	0.808849	0.808859	1.42207	1.38096	0.10017	1.95435	2.68633	0.269159	3.19108
105	0.543114	0.830536	0.933681	0.2527	0.298062	0.474498	0.813261	0.635285	0.582869	0.974813	1.53374	0.767764	1.29396	1.88088	2.4918	1.32464	13.9325	10.054	4.92e-08	5.22e-08	2.81779	2.02362	0.101372	1.57705	0.728838	0.103293	0.101026	0.101889	0.100977	0.10017	0.103274	2.55324	0.106495	0.112996
106	0.157507	0.354328	0.130647	-0.601361	-0.122142	-0.189598	-0.203112	-0.409149	0.23804	0.444977	0.403107	-0.0159191	0.97745	1.4004	1.24042	0.485536	15.4532	9.10908	1.64e-07	1.72e-07	2.81057	2.07145	0.101372	0.100986	0.10018	0.103293	0.101026	0.101889	0.100977	0.10017	0.103274	2.5676	0.106495	0.75734
107	3.36485	2.24634	0.875459	-2.17832	2.18137	2.35262	2.84529	1.3565	3.89491	3.52919	3.00399	-0.773544	5.89542	5.23434	3.62453	0.991613	13.2361	56.0119	5.05e-18	4.12e-17	3.05274	2.2207	0.101372	1.34314	0.10018	0.103293	0.87137	1.29553	1.06439	0.700054	2.044	2.68183	0.106495	3.14936
108	3.59549	1.76028	0.0989356	-3.51087	2.38221	2.67874	2.52883	1.30665	4.10643	3.39696	2.38206	0.000314765	5.65416	4.57755	3.50175	1.46152	12.613	53.1772	7.67e-18	5.91e-17	3.05951	2.25728	0.101372	0.478714	0.902354	0.103293	1.02923	1.50497	1.25829	0.299205	2.08386	2.70468	0.106495	3.15541
109	-0.026568	-0.0455151	-0.112911	-0.701788	-0.392591	-0.582455	-0.635332	-1.05644	-0.195813	-0.340638	-0.589098	-0.859238	0.215451	0.435461	0.175129	-0.587057	15.8515	4.50089	0.000197718	0.000200797	2.86491	2.11729	0.101372	0.100986	0.10018	0.103293	0.101026	0.627015	0.100977	0.10017	0.103274	2.5951	0.106495	0.101254
111	2.10702	2.17476	1.05625	-2.22584	1.01264	2.28125	2.82516	2.42344	2.42131	3.66271	3.41062	2.04796	3.58585	3.81187	3.5352	1.94563	13.4375	20.0345	1.04e-11	1.23e-11	3.06393	2.20572	1.30397	1.57227	0.10018	0.103293	0.101026	1.31122	1.4445	0.848768	1.7457	2.6755	0.106495	3.15108
112	2.21579	2.53467	2.01573	-1.49097	1.11338	2.69022	3.96914	4.38193	2.18693	4.54458	5.20326	4.33045	4.16086	5.21292	5.16827	4.10484	15.0266	48.3208	6.23e-17	2.91e-16	3.08908	2.2201	1.65182	1.37284	0.768026	0.103293	0.101026	1.20617	1.07198	0.10017	1.54063	2.64408	0.106495	3.21165
113	0.646584	2.8903	0.375825	-1.35301	-0.0244345	2.69141	3.34391	4.95634	1.16337	4.33898	3.76449	5.17725	1.33707	1.99996	2.78459	4.87693	14.2387	31.7357	2.17e-14	3.83e-14	3.12486	2.25544	0.643713	1.05105	1.04321	0.103293	0.101026	1.25864	1.54561	0.10017	0.103274	2.60537	0.106495	3.31875
114	2.49572	2.13709	1.20608	-2.28047	2.08951	2.53616	3.23513	1.89587	3.41027	4.18916	3.77908	1.4729	4.9291	4.63739	3.89334	1.68053	12.7268	29.3659	6.26e-14	1e-13	3.06175	2.23866	1.34233	1.02289	0.933174	0.885118	0.209346	1.4679	1.38602	0.10017	2.05016	2.69675	0.853734	3.21439
115	0.052637	0.218114	0.224858	-0.44288	-0.331543	-0.259468	-0.21915	-0.325314	-0.0558606	0.312681	0.384255	0.0413963	0.809715	1.29763	1.26385	0.559919	16.2605	9.01889	1.83e-07	1.92e-07	2.81537	2.07558	0.101372	0.41788	0.10018	0.103293	0.101026	0.101889	0.100977	0.10017	0.103274	2.57259	0.106495	0.101254
116	-0.43875	-0.167888	0.0367714	-0.241969	-0.633594	-0.506393	-0.470013	-1.72407	-0.830254	-1.2881	-2.17348	-2.61017	-1.55352	-2.01009	-2.4131	-3.00626	14.9307	31.0238	1.68e-14	3.06e-14	2.97828	2.24218	0.940325	0.399626	0.331485	0.103293	0.311876	0.826456	1.03651	0.10017	0.103274	2.62481	0.106495	0.101254
117	1.07113	2.50758	2.31705	-3.99794	0.254318	2.61455	4.41045	5.4042	1.45153	4.47637	5.6915	4.70797	3.01988	5.03093	4.68371	3.93107	13.8184	42.6754	3.57e-16	1.13e-15	3.07952	2.20941	1.69452	0.100986	0.102218	0.103293	0.180389	1.242	0.487633	0.10017	0.868362	2.63211	0.106495	3.13506
118	-0.69199	-0.398997	0.488097	-0.0359792	-0.335719	-0.109372	-0.346053	-1.91041	-0.824842	-1.5755	-2.32367	-3.32314	-2.69831	-3.38282	-4.87121	-5.82123	12.5181	25.9257	3.39e-13	4.83e-13	2.99946	2.26523	1.30322	0.100986	0.964165	0.103293	0.829417	0.789876	1.60437	0.10017	0.103274	2.63473	0.106495	0.232449
119	1.11101	2.79686	0.790012	-2.03624	0.265712	2.77044	3.05667	4.43816	1.43549	4.14618	3.44173	4.16756	1.21917	1.93824	2.13588	3.51113	14.1116	25.4492	4.35e-13	6.11e-13	3.08439	2.23919	0.101372	1.39398	0.698387	0.103293	0.101026	1.33459	1.35749	0.10017	0.103274	2.63143	0.106495	3.19981
120	0.0415605	-0.267089	-0.0551699	0.129234	0.0989511	-0.266378	-0.638331	-0.93397	-0.0222325	-0.760597	-1.34736	-1.52484	-0.921928	-0.968965	-0.904121	-1.10722	15.2948	11.3247	1.04e-08	1.11e-08	2.93153	2.13889	0.101372	1.25825	0.10018	0.103293	0.101026	0.634013	1.19866	0.10017	0.103274	2.60387	0.106495	1.08678
121	-0.730034	-0.152923	0.227397	0.218404	-0.223364	-0.132858	-0.239043	-1.86382	-0.854086	-1.20467	-2.22623	-3.60199	-2.84307	-3.20876	-4.10299	-5.6763	15.3618	50.2593	3.58e-17	1.89e-16	3.01535	2.29818	1.28022	1.61914	0.10018	0.103293	0.101026	1.35374	1.58857	0.10017	0.103274	2.67057	0.106495	0.909905
122	2.1249	2.0528	1.0017	-1.38733	0.863601	2.50896	3.25853	3.30703	1.97986	3.74019	3.64404	3.41742	3.49644	3.95568	3.70239	3.15203	12.9201	20.1439	9.67e-12	1.15e-11	3.07148	2.21768	1.34285	1.53724	0.513294	0.103293	0.101026	0.454509	1.49157	0.10017	1.57761	2.63504	0.106495	3.11421
124	0.160436	0.455667	0.440189	-0.222977	-0.174418	-0.0370212	0.0798752	-0.0391042	0.116709	0.522339	0.680036	0.325353	0.965621	1.50702	1.57416	0.821425	16.4086	10.21	4.44e-08	4.72e-08	2.81208	2.06649	0.101372	1.06153	0.10018	0.103293	0.101026	0.101889	0.100977	0.10017	0.103274	2.56979	0.106495	0.101254
126	1.72078	2.90325	3.0473	-1.06094	1.08016	2.9978	4.82321	5.12038	1.90714	5.1205	6.04968	4.48699	4.20943	6.00282	5.78418	4.07286	14.0943	51.97	2.23e-17	1.34e-16	3.09586	2.25073	1.85689	1.25304	0.647073	0.627207	0.101026	1.42935	1.03417	0.10017	1.50118	2.67852	0.106495	3.24487
128	1.32658	2.7363	0.936263	-2.71887	0.0193833	2.42077	3.4295	4.47716	1.39661	4.44635	4.17538	3.85169	2.49688	3.20708	2.85265	2.54432	13.6516	24.3273	7.96e-13	1.06e-12	3.06712	2.22215	1.20383	0.304657	0.10018	0.103293	0.101026	1.35152	1.31034	0.10017	0.825193	2.65315	0.731259	3.19336
129	1.78158	2.2463	0.735381	-2.32158	0.716749	2.19742	2.67324	3.61206	2.07645	3.72519	3.30567	2.59452	3.38371	3.65246	1.93249	1.34925	13.2528	24.0556	9.25e-13	1.23e-12	3.05653	2.25647	0.26661	1.4968	0.10018	0.103293	0.101026	1.37627	0.100977	0.10017	0.977451	2.67031	0.106495	2.9921
132	0.817529	2.26732	1.60715	-1.59701	-0.0302782	2.12097	3.69513	4.76582	1.09201	3.98868	4.63829	4.225	1.2917	2.94908	3.08839	3.02846	13.9443	33.7056	9.48e-15	1.86e-14	3.07343	2.22361	1.26462	1.29393	0.10018	0.103293	0.101026	1.23253	0.146171	0.10017	0.103274	2.61675	0.106495	3.06607
133	1.10216	1.28099	0.369464	-0.70162	0.572706	1.41197	1.51876	1.38736	1.32184	2.02086	0.879814	0.158541	1.15874	0.581991	0.00987673	-0.504544	13.0569	8.46273	3.73e-07	3.86e-07	3.03622	2.27601	1.15969	0.100986	1.07082	0.103293	0.101026	1.40325	1.40984	0.10017	1.01561	2.66964	0.106495	2.5994
134	0.317436	0.444271	-0.135955	-0.41971	-0.0367892	-0.244223	-0.386842	-0.719283	0.251654	-0.0367005	-0.702064	-0.84217	0.395855	0.184612	-0.0232057	-0.579418	14.4701	3.56587	0.00132753	0.00133457	2.90118	2.18785	0.101372	1.74504	0.10018	0.103293	0.101026	0.787236	0.100977	0.10017	0.103274	2.6242	0.106495	0.903619
135	-0.12554	-0.411745	-0.374025	-0.16219	-0.235178	-0.409023	-0.870408	-1.41129	-0.323258	-0.999512	-1.9057	-2.1968	-1.12464	-1.3156	-1.75781	-1.90322	15.6136	17.1263	7.91e-11	9e-11	2.94929	2.19265	0.101372	0.100986	0.10018	0.103293	0.101026	0.890584	1.22772	0.10017	0.103274	2.61594	0.106495	1.11261
136	1.09501	2.35754	0.300274	-2.98031	0.23965	2.15141	3.03325	4.11773	1.42517	3.88282	3.12645	3.45673	2.06589	2.73872	2.06335	2.54121	13.4267	24.883	5.88e-13	8.02e-13	3.04753	2.194	0.101372	0.100986	0.10018	0.103293	0.101026	1.25421	1.06172	0.10017	0.103274	2.61536	0.106495	3.06429
137	-0.0735968	-0.329906	-0.52845	0.0374829	0.133907	-0.218644	-1.01924	-1.58032	-0.0793275	-1.28442	-2.65999	-3.55973	-1.99914	-3.36093	-4.47755	-5.11969	14.8867	57.9127	3.96e-18	3.51e-17	2.98987	2.23616	0.101372	1.05961	0.10018	0.103293	0.101026	1.33976	1.43907	0.214684	0.103274	2.64705	0.391368	1.20382
138	-0.711138	-0.638983	-0.0265071	0.169077	-0.307192	-0.504981	-0.925415	-2.43771	-1.03711	-1.83107	-3.13892	-4.26128	-3.27377	-3.76701	-4.85992	-6.6882	15.7359	75.4964	1.08e-19	2.65e-18	3.0051	2.29004	1.00868	1.22857	0.10018	0.103293	0.101026	1.36614	1.63379	0.386267	0.103274	2.66073	0.106495	0.101254
139	0.0799005	0.219708	0.252514	-0.456038	-0.310888	-0.256612	-0.169703	-0.331068	-0.0538885	0.356985	0.440922	0.101774	0.843806	1.4111	1.34436	0.611809	15.9428	8.93431	2.04e-07	2.13e-07	2.81055	2.06433	0.101372	0.100986	0.10018	0.103293	0.101026	0.101889	0.100977	0.10017	0.103274	2.56711	0.106495	0.101254
140	-0.327952	-0.605078	-0.841731	-0.0864023	-0.0705031	-0.412413	-1.34223	-1.75179	-0.311705	-1.78793	-3.00758	-3.37796	-2.62642	-3.61218	-4.9016	-5.70652	13.2249	36.4768	1.71e-15	4.24e-15	2.98131	2.25043	0.101372	0.100986	0.10018	0.103293	0.101026	1.39071	1.4875	0.804717	0.103274	2.64424	0.508223	1.14316
141	-0.805204	1.92434	1.74946	-1.01668	-0.625133	2.24558	4.0398	4.84522	0.634697	3.37856	4.73768	4.49573	0.07915	2.18761	3.0299	3.59625	13.1567	36.8978	2.71e-15	6.42e-15	3.07142	2.16086	1.62166	1.12802	0.10018	0.103293	0.101026	0.722624	1.35028	0.374887	0.103274	2.6082	0.106495	3.08698
143	1.32198	2.14243	1.6053	-1.19596	0.451201	2.19796	3.56179	4.05671	1.45623	3.74246	4.35265	3.15068	2.40838	3.71003	2.85396	1.99449	13.8336	33.712	9.45e-15	1.86e-14	3.05144	2.21721	1.48393	1.02059	0.10018	0.103293	0.101026	1.31996	0.100977	0.10017	0.78341	2.63056	0.106495	2.94395
144	-0.344668	-0.8265	-0.440216	-0.095283	-0.296085	-0.82961	-1.2446	-1.8373	-0.599445	-1.95265	-2.66483	-2.89321	-2.18865	-2.84297	-3.0895	-3.24035	15.5284	49.2915	2.3e-17	1.38e-16	2.96337	2.18739	0.101372	0.91457	0.10018	0.103293	0.527241	1.15645	1.41806	0.10017	0.103274	2.62336	0.106495	0.101254
145	-0.245543	-0.716166	-0.389829	-0.0519053	-0.134262	-0.666521	-1.36732	-2.05954	-0.525268	-1.92301	-2.97237	-3.2971	-2.31453	-3.20566	-3.8939	-4.12536	16.179	88.8062	4.15e-21	3.49e-19	2.98094	2.23304	0.101372	1.23735	0.10018	0.103293	0.101026	1.30145	1.43573	0.196986	0.103274	2.63635	0.106495	0.101254
146	-0.274073	-0.622313	-0.544221	-0.0863859	-0.0380529	-0.666136	-1.66962	-2.23903	-0.354303	-1.98374	-3.30866	-3.79009	-2.21332	-3.90617	-4.59573	-4.59573	14.6906	64.1114	5.03e-19	7.2e-18	2.98042	2.23808	0.101372	1.29895	0.10018	0.103293	0.101026	1.29002	1.47266	0.10017	0.906669	2.63272	0.106495	0.101254
149	0.23539	0.326875	0.11152	-0.501175	-0.110958	-0.169435	-0.270182	-0.389255	0.210178	0.453412	0.366592	0.0841017	1.05658	1.46168	1.29485	0.728485	15.6485	9.49473	1.02e-07	1.08e-07	2.80314	2.03857	0.101372	0.100986	0.10018	0.103293	0.101026	0.101889	0.100977	0.10017	0.103274	2.55601	0.106495	0.682609
150	-0.538168	-0.211854	0.319619	0.163634	-0.00825828	0.135364	-0.172623	-1.57589	-0.504297	-1.06123	-2.09898	-3.45067	-2.72229	-3.26236	-3.77083	-5.74413	13.8737	34.4462	7.02e-15	1.45e-14	3.00209	2.27687	1.32937	0.100986	1.04092	0.103293	0.101026	1.39691	1.54859	0.10017	0.103274	2.65166	0.106495	0.923756
152	0.426526	0.962202	-0.442883	-0.437048	0.0419426	0.971244	1.02371	1.26883	0.336772	1.60467	-0.0574829	0.331554	-0.253638	-0.292722	-1.35971	-0.628726	13.4242	8.98878	1.9e-07	1.99e-07	3.02725	2.24747	0.101372	0.257411	0.10018	0.103293	0.101026	1.16791	1.49622	0.10017	0.103274	2.6317	0.106495	2.62292
153	-0.101211	-0.77285	-0.60068	-0.0839385	0.0850536	-0.473461	-1.64623	-2.32098	-0.12037	-2.0683	-3.18835	-4.09409	-2.34978	-3.49261	-5.13318	-5.46331	15.0381	74.7946	9.52e-20	2.43e-18	2.97537	2.23567	0.101372	0.569521	0.939582	0.103293	0.465974	1.36536	1.51283	0.10017	0.103274	2.62372	0.106495	0.757225
154	3.15671	2.74284	2.0076	-1.22386	2.20138	3.22749	4.41377	3.39728	3.31741	4.91547	5.59996	2.90267	5.60131	6.67908	5.7251	2.43599	12.4016	39.6162	1.01e-15	2.65e-15	3.06235	2.18685	1.69523	0.100986	0.631692	0.103293	0.245359	1.36464	0.100977	0.78397	1.91609	2.67209	0.106495	3.16825
155	2.82412	2.30227	0.781348	-3.63018	1.73333	2.75369	2.97343	2.25294	3.50772	4.01087	3.46407	1.59245	5.18174	4.65531	4.25546	2.33503	12.7556	25.3359	4.62e-13	6.42e-13	3.05537	2.25103	1.13332	0.420939	1.00062	0.767217	0.876497	1.4803	1.3635	0.850448	1.9431	2.6934	0.485372	3.2148
156	-3.17417	1.90048	3.51354	-0.0170393	0.557855	1.87012	3.78567	5.89174	0.0172222	3.06616	7.24459	7.81104	0.557855	3.04392	7.26639	8.24229	12.5332	57.2211	1.66e-17	1.04e-16	3.14587	2.06056	1.74065	2.60359	0.87637	0.605096	0.101026	1.23246	1.21632	0.10017	0.71768	2.49889	0.106495	3.31442
158	0.119753	0.285225	0.119941	-0.374183	-0.202793	-0.27583	-0.301108	-0.597326	0.0244672	-0.0600271	-0.225158	-0.551057	0.34555	0.559457	0.555192	-0.200704	16.0888	3.75311	0.000892096	0.000897298	2.86895	2.13536	0.101372	1.3804	0.10018	0.103293	0.101026	0.406268	0.100977	0.10017	0.103274	2.60045	0.106495	0.101254
159	3.25971	2.3849	0.755276	-3.97362	2.15855	2.72752	3.11916	2.48912	3.62534	4.34248	3.41578	1.31425	5.636	5.26949	3.0441	0.542159	14.6534	78.6696	5.96e-20	1.83e-18	3.03569	2.2195	0.518122	1.12497	0.10018	0.370654	0.101026	1.30995	0.889754	0.272933	1.90224	2.67411	0.287099	3.09742
160	0.165088	0.229833	0.0493779	-0.741357	-0.178218	-0.250496	-0.270556	-0.57509	0.177936	0.319024	0.177872	-0.172864	0.80788	1.14011	1.02706	0.139151	14.9586	6.63449	4.98e-06	5.11e-06	2.82785	2.08348	0.101372	0.100986	0.157053	0.103293	0.101026	0.101889	0.100977	0.10017	0.103274	2.57591	0.106495	0.6515
161	1.8611	2.5548	2.20131	-0.424433	1.18664	2.65354	4.03163	4.6826	1.83969	4.59592	5.84011	4.5572	3.92468	5.5482	5.75087	4.22262	13.3403	41.193	5.86e-16	1.68e-15	3.09636	2.25083	1.76996	1.70668	0.965931	0.103293	0.456124	1.3831	0.100977	0.10017	1.30773	2.66451	0.106495	3.19124
162	3.01834	2.49286	0.967699	-1.899	2.20465	3.17346	3.38693	2.375	3.596	4.22893	3.80406	1.54018	5.32691	4.95588	4.59175	2.55939	12.6399	29.4174	6.12e-14	9.8e-14	3.06547	2.23755	1.17036	0.100986	0.948629	0.440964	0.987383	1.49237	1.35564	0.473126	1.9223	2.70558	0.71039	3.21203
163	-0.561548	0.250598	0.196801	-0.485526	-0.850335	-0.299736	0.421331	-0.623671	-0.643189	-0.472285	-1.28188	-1.76101	-0.956301	-1.49383	-2.27021	-2.83023	13.3099	12.1028	5.07e-09	5.47e-09	2.98554	2.20795	1.25926	0.100986	0.10018	0.103293	0.101026	1.02232	0.565432	0.10017	0.103274	2.63524	0.106495	1.07025
164	0.0809745	-0.400718	0.0752297	0.316255	0.316448	-0.298161	-0.911502	-1.6941	-0.147001	-1.45855	-2.24513	-2.56491	-2.09865	-2.82608	-2.40465	-2.94883	14.7086	48.8705	2.6e-17	1.47e-16	2.97621	2.19863	0.136339	1.56331	0.904745	0.103293	0.101026	0.940744	1.5104	0.262037	0.103274	2.62821	0.106495	0.101254
165	-0.496172	-0.27856	0.0512006	0.0130724	-0.209893	-0.321849	-0.620007	-2.09159	-0.70443	-1.41905	-2.7662	-3.91188	-2.33671	-3.26064	-4.6164	-6.06816	15.4512	51.5128	2.52e-17	1.45e-16	2.99326	2.26722	1.10662	1.38632	0.10018	0.103293	0.101026	1.32754	1.47628	0.10017	0.744924	2.64821	0.106495	0.284568
166	-0.588002	-0.586476	-0.471356	0.311174	0.0843834	-0.236297	-1.12779	-2.11277	-0.495424	-1.72591	-2.94012	-3.91767	-3.09879	-3.9431	-4.92583	-6.22399	14.5706	58.6555	4e-18	3.53e-17	2.9964	2.26817	0.532072	1.53209	0.10018	0.103293	0.101026	1.298	1.69381	0.10017	0.103274	2.65426	0.695899	1.02714
167	0.190941	0.548835	0.55177	-0.273553	-0.111241	0.010379	0.187922	0.0895245	0.198357	0.743562	0.888201	0.565459	1.22523	1.79393	1.84328	1.03549	15.648	13.5742	1.47e-09	1.61e-09	2.80943	2.04417	0.101372	1.14787	0.10018	0.103293	0.101026	0.101889	0.100977	0.10017	0.103274	2.57877	0.106495	0.101254
168	-0.170495	-0.517381	-0.36685	0.314401	0.221858	-0.216248	-1.34271	-2.06935	-0.168453	-1.4604	-3.1107	-3.50244	-2.2699	-3.3579	-3.8206	-4.59003	13.6375	48.684	2.75e-17	1.54e-16	3.00211	2.27165	0.101372	1.62777	0.148675	0.717393	0.101026	1.13768	1.58744	0.10017	0.103274	2.65203	0.106495	1.16854
169	2.80841	2.11185	0.350593	-5.98821	1.98291	2.71884	2.399	1.94277	3.47954	3.64141	2.33143	1.16538	4.69953	4.16325	3.38234	2.20141	12.3908	28.1398	1.67e-13	2.47e-13	3.05279	2.23143	0.610115	0.100986	0.926972	0.103293	0.857524	1.45701	1.52034	0.730955	1.89717	2.68643	0.572883	3.16352
170	0.208065	0.379953	0.212599	-0.295568	-0.10391	-0.189	-0.204638	-0.47863	0.163998	0.062833	-0.0659156	-0.395958	0.475485	0.700247	0.709725	-0.000211745	16.2338	4.0961	0.000439969	0.000443157	2.8631	2.1236	0.101372	1.38635	0.10018	0.103293	0.101026	0.24754	0.100977	0.10017	0.103274	2.59869	0.106495	0.159056
171	-0.660688	-0.709786	-0.332722	0.0214612	-0.258172	-0.548641	-1.15739	-2.43864	-0.849543	-1.96433	-3.30721	-4.23553	-3.09002	-4.01918	-5.35457	-6.42379	15.9873	71.0217	2.59e-19	4.5e-18	3.00133	2.28119	0.787769	1.40136	0.10018	0.103293	0.101026	1.35525	1.61373	0.10017	0.385053	2.65828	0.106495	0.101254
172	-0.348582	-0.631099	-0.456452	-0.0306495	-0.188672	-0.697485	-1.48098	-2.02224	-0.496898	-1.99994	-2.77624	-3.08234	-2.27796	-3.30361	-3.85161	-3.98999	15.0466	67.7225	2.25e-19	4.21e-18	2.98531	2.24971	0.101372	1.34914	0.10018	0.103293	0.575628	1.06664	1.44061	0.35613	0.203176	2.64043	0.106495	0.101254
173	-0.274528	-0.136791	-0.332952	-0.773607	-0.64215	-0.747766	-0.773204	-1.66861	-0.509223	-1.06978	-2.15549	-2.26163	-0.712039	-1.19482	-1.85535	-2.56755	14.7657	15.2845	3.35e-10	3.75e-10	2.95482	2.22384	0.390173	0.100986	0.10018	0.103293	0.101026	1.23502	0.235091	0.10017	0.103274	2.62061	0.106495	0.101254
174	-0.210628	-0.284196	-0.708812	-0.277992	0.134223	-0.303605	-1.23714	-1.91527	-0.0836084	-1.61839	-3.13946	-3.62918	-2.44432	-3.92541	-5.09151	-6.09209	13.274	40.9013	3.36e-16	1.09e-15	2.99347	2.26885	0.101372	1.3955	0.519731	0.0969104	0.430901	1.34734	1.4057	0.404415	0.103274	2.64904	0.961774	0.101254
175	-0.42892	-0.599056	-0.0487828	0.0575701	-0.428952	-0.547185	-0.73856	-1.21534	-0.801233	-1.25214	-1.592	-1.56158	-1.53643	-1.15029	-1.07175	-1.18722	15.7566	11.7483	7.58e-09	8.13e-09	2.92924	2.17167	0.101372	0.100986	0.10018	0.103293	0.101026	0.192574	1.30695	0.10017	0.103274	2.60178	0.106495	0.506313
176	-0.184035	-0.742849	-0.85335	-0.043607	0.0445029	-0.459969	-1.67898	-2.2046	-0.177628	-2.13394	-3.50024	-4.02135	-2.70676	-3.72364	-5.30665	-6.60295	13.1138	40.7195	4.11e-16	1.26e-15	2.99948	2.27857	0.101372	0.100986	0.941697	0.103293	0.38021	1.43187	1.58463	0.756172	0.103274	2.65276	0.598699	0.246352
177	-0.231368	-0.671424	-0.446267	0.087593	-0.071389	-0.552054	-1.29169	-2.06271	-0.439198	-1.79226	-3.08357	-3.77154	-2.43252	-3.53283	-4.50955	-5.00513	16.4828	100.014	1.85e-21	2.13e-19	2.98694	2.24438	0.101372	1.09432	0.10018	0.103293	0.101026	1.34006	1.51381	0.10017	0.103274	2.64528	0.106495	0.912366
178	-0.61747	-0.341685	0.184891	0.129324	-0.26013	-0.309092	-0.665017	-2.34042	-0.838923	-1.56356	-2.82075	-4.40192	-2.7952	-3.67009	-5.09674	-6.33363	14.7744	58.8028	3.85e-18	3.44e-17	2.99561	2.27373	1.21378	0.666503	0.860554	0.103293	0.101026	1.22332	1.56781	0.10017	0.652609	2.65228	0.106495	0.101254
179	-0.616972	-1.01159	-0.537925	-0.0629572	-0.443876	-0.843733	-1.55049	-2.49664	-0.941227	-2.31389	-3.38719	-4.08203	-3.24527	-3.89426	-5.17699	-5.14624	15.7026	95.4454	1.43e-21	1.8e-19	2.98321	2.24781	0.108995	0.100986	0.10018	0.103293	0.101026	1.31818	1.60309	0.10017	0.103274	2.63762	0.106495	0.101254
180	-0.754983	-0.377579	0.115073	0.0881452	-0.429231	-0.251074	-0.371471	-1.8282	-0.966531	-1.31546	-2.46375	-3.92634	-2.93749	-3.20913	-4.28865	-5.7067	15.4322	43.6719	2.59e-16	8.64e-16	2.99831	2.26763	1.26091	0.486108	0.10018	0.103293	0.101026	1.36005	1.57417	0.10017	0.124467	2.6532	0.106495	0.98781
181	-0.224513	0.0577797	0.130488	-0.194926	-0.194592	-0.137801	-0.109403	-1.43227	-0.36859	-0.648764	-1.99452	-3.28944	-1.44055	-2.52493	-3.66717	-4.75104	14.0843	23.7549	1.09e-12	1.44e-12	2.99432	2.26788	1.20029	0.100986	0.767143	0.103293	0.101026	1.32547	1.19136	0.10017	0.526469	2.64532	0.106495	1.15692
182	-0.954696	-0.751179	-0.43577	-0.112824	-0.643651	-0.641721	-1.02122	-2.29564	-0.86748	-1.76165	-3.30246	-4.39939	-3.02258	-3.73651	-4.35067	-5.70933	13.5809	49.5612	2.13e-17	1.3e-16	2.99509	2.26764	1.03673	0.100986	0.10018	0.103293	0.863714	1.4272	1.59531	0.10017	0.103274	2.65435	0.361552	0.184248
184	-0.138736	-0.156974	-0.051977	-0.172798	-0.344561	-0.304654	-0.370392	-1.5318	-0.379726	-1.00722	-2.25313	-2.89273	-1.23766	-2.10244	-3.05374	-3.34017	15.1672	33.534	1.02e-14	1.99e-14	2.97156	2.19986	0.926088	0.100986	0.10018	0.103293	0.101026	1.18063	1.10893	0.10017	0.503672	2.62704	0.106495	1.02678
185	-0.53867	-0.788794	-0.614996	-0.079719	-0.216601	-0.65451	-1.53656	-2.31563	-0.771451	-2.07564	-3.52014	-4.15438	-3.08924	-4.26061	-5.68417	-6.2523	15.1238	88.5355	5.28e-21	4.03e-19	2.99195	2.27647	0.150354	1.24515	0.10018	0.103293	0.101026	1.28076	1.58709	0.10017	0.75279	2.65325	0.332706	0.101254
186	3.14572	1.38389	-0.0245662	-1.19873	2.29296	2.15447	1.54022	0.500699	3.40496	2.58802	1.26916	-0.773362	4.05433	3.03888	0.690542	-1.43729	13.5632	55.8808	3.73e-18	3.38e-17	3.02718	2.23803	0.101372	1.41762	0.321007	0.478695	0.101026	1.38286	1.39941	0.10017	1.87974	2.67402	0.106495	2.86153
188	-0.486735	-0.728278	-0.466489	-0.176431	-0.258053	-0.679297	-1.22374	-2.11466	-0.726725	-1.87307	-3.19686	-3.53719	-2.83901	-3.77163	-4.62256	-5.17741	15.6247	76.4876	5.26e-20	1.69e-18	2.98123	2.25355	0.101372	0.902721	0.10018	0.103293	0.101026	1.2415	1.45908	0.145557	0.103274	2.64273	0.515495	0.101254
190	-0.421356	-0.844756	-0.665637	-0.312296	-0.386609	-0.885961	-1.57085	-2.19933	-0.724336	-2.10113	-3.35211	-3.73214	-2.64646	-3.54218	-4.58861	-4.87898	15.1017	63.5059	9.44e-19	1.2e-17	2.97709	2.25573	0.101372	0.100986	0.10018	0.103293	0.101026	1.32402	1.4186	0.10017	0.103274	2.63843	0.106495	0.101254
191	0.222179	0.499543	0.423233	-0.385286	-0.117669	-0.0604624	0.0667889	-0.0864025	0.210766	0.600156	0.718909	0.281579	1.03432	1.55435	1.61407	0.784236	16.2071	11.7501	8.48e-09	9.07e-09	2.81258	2.07048	0.101372	1.02635	0.10018	0.103293	0.101026	0.101889	0.100977	0.10017	0.103274	2.57254	0.106495	0.106114
192	-0.585811	-0.351095	-0.125573	0.124646	-0.216376	-0.250004	-0.701188	-2.22531	-0.699561	-1.45947	-2.7164	-4.01658	-2.76074	-3.56912	-4.65851	-5.86424	15.5114	49.6864	4.21e-17	2.18e-16	3.00488	2.27248	1.10288	1.3149	0.10018	0.103293	0.350963	1.2654	1.61324	0.10017	0.712291	2.65736	0.106495	0.91725
194	-0.189864	-0.526565	-0.415256	-0.261338	-0.244839	-0.597599	-1.07939	-1.57972	-0.41557	-1.33132	-1.97753	-2.08848	-1.22455	-1.46333	-1.65163	-1.93604	16.0689	19.682	1.31e-11	1.55e-11	2.9426	2.187	0.101372	0.100986	0.10018	0.103293	0.101026	0.993827	1.16577	0.10017	0.103274	2.6061	0.106495	0.799883
195	1.19304	-0.230321	-0.781963	-0.323816	0.705108	0.444427	-0.460515	-1.82208	1.40177	-0.116104	-2.68125	-4.78506	0.477881	-1.36356	-3.14384	-6.55401	12.2709	24.7955	6.16e-13	8.36e-13	3.013	2.26082	0.101372	0.100986	0.198284	0.103293	0.101026	1.27298	1.5607	0.10017	1.54051	2.67575	0.106495	1.81575
196	-0.591901	-0.577812	-0.0947874	0.144626	-0.190609	-0.543138	-1.04376	-2.38973	-0.759079	-1.9037	-2.98152	-4.46186	-2.99201	-3.78462	-5.01259	-6.88744	15.7929	73.9339	1.46e-19	3.23e-18	3.00564	2.28284	0.983469	1.22484	0.709273	0.103293	0.443984	1.37654	1.61482	0.10017	0.103274	2.65927	0.106495	0.101254
197	-0.481822	-0.928244	-0.425807	-0.0374323	-0.340839	-0.798843	-1.3973	-2.08157	-0.775777	-2.08757	-2.999	-3.28115	-2.81888	-3.26258	-3.64472	-3.68938	16.2475	90.3977	3.19e-21	2.93e-19	2.9751	2.23474	0.101372	0.100986	0.10018	0.103293	0.101026	1.2209	1.53592	0.10017	0.103274	2.63392	0.106495	0.101254
199	-0.159897	-0.414242	0.105791	0.475442	0.273479	-0.238444	-0.922279	-2.38106	-0.239965	-1.91304	-2.93239	-3.97547	-2.78634	-3.92644	-4.71666	-6.892	13.6612	42.8264	3.4e-16	1.1e-15	2.99281	2.25011	0.873949	1.13305	0.979007	0.52702	0.660026	1.31636	1.68144	0.10017	0.103274	2.64441	0.106495	0.101254
200	-0.344501	-0.807844	-0.529904	0.0364525	-0.137931	-0.471687	-1.38137	-1.9475	-0.495403	-1.93166	-2.91581	-3.21628	-2.94147	-3.45209	-3.95344	-3.83392	14.3205	45.2787	8.35e-17	3.56e-16	2.98136	2.24292	0.101372	0.100986	0.699178	0.103293	0.101026	0.914836	1.60922	0.10017	0.103274	2.63725	0.300418	1.02996
201	-0.71619	-0.731217	-0.538485	-0.315301	-0.389724	-0.716695	-1.29492	-2.31063	-0.80388	-1.92073	-3.51345	-4.25467	-2.92375	-3.81206	-5.66096	-5.89639	14.2566	54.1384	7.89e-18	5.95e-17	2.98594	2.24353	0.593672	0.100986	0.10018	0.103293	0.101026	1.20707	1.51738	0.10017	0.785103	2.63694	0.652357	0.101254
202	-0.198074	0.058512	0.108248	0.0724113	0.0866044	0.045513	-0.385435	-1.96275	-0.227061	-0.95392	-2.02837	-3.72075	-1.69028	-2.75083	-3.8234	-5.15103	14.1856	28.3522	1.01e-13	1.56e-13	2.98873	2.23886	1.15071	0.994796	0.887159	0.103293	0.796459	1.24433	1.44776	0.10017	0.358116	2.64289	0.106495	1.12676
203	-0.588586	-0.726248	-0.293259	-0.0657411	-0.448967	-0.641054	-1.11311	-2.24754	-0.882823	-1.87766	-3.1227	-3.99321	-2.8339	-3.4939	-4.83916	-5.37583	16.4907	94.3895	4.29e-21	3.53e-19	2.99114	2.26196	0.64655	0.100986	0.10018	0.103293	0.101026	1.29162	1.52843	0.10017	0.103274	2.64965	0.106495	0.761138
204	0.275871	0.448299	-0.440682	0.0703955	0.315206	0.617036	0.0656676	0.0252617	0.332785	0.627168	-0.892145	-1.2633	-1.04402	-1.42862	-2.68216	-2.32164	14.5052	22.0368	2.23e-12	2.81e-12	3.0201	2.27367	0.101372	1.38837	0.10018	0.103293	0.101026	1.3183	1.48635	0.10017	0.103274	2.65634	0.106495	1.717
206	-0.16742	0.337421	0.416358	0.369354	0.34528	0.106089	-0.276103	-1.41175	-0.00850778	-0.913951	-2.39968	-3.33094	-1.91901	-2.97252	-3.73113	-6.70002	13.7791	33.3241	1.11e-14	2.12e-14	3.02288	2.31886	1.18417	1.53177	0.859181	0.103293	0.101026	1.43577	1.44585	0.878874	0.103274	2.67775	0.106495	0.965756
207	-0.593224	-0.437742	-0.158743	0.119836	-0.238155	-0.437571	-0.939758	-2.35067	-0.726441	-1.83127	-2.93484	-4.1595	-2.82326	-3.49368	-4.54039	-6.23205	15.2572	62.152	1.75e-18	1.9e-17	3.00089	2.28602	1.06823	1.08541	0.457735	0.103293	0.879611	1.35348	1.59548	0.10017	0.103274	2.65571	0.106495	0.519788
208	-0.20526	-0.693071	-0.345962	0.10666	-0.0125386	-0.499658	-1.25124	-1.9733	-0.322471	-1.76047	-2.92156	-3.44759	-2.3758	-3.40457	-3.88843	-4.17439	15.8842	74.1766	7.1e-20	2.07e-18	2.9752	2.22631	0.101372	1.07385	0.10018	0.103293	0.101026	1.24489	1.51617	0.10017	0.103274	2.63479	0.106495	0.956668
209	-0.43613	-0.418594	-0.228038	0.0988446	-0.0721526	-0.42092	-1.04529	-2.0925	-0.61642	-1.59757	-3.02817	-3.62881	-2.51702	-3.5322	-4.4465	-5.80985	15.9807	74.9791	1.19e-19	2.72e-18	3.00436	2.29105	0.572752	1.6824	0.10018	0.103293	0.101026	1.30666	1.48536	0.150224	0.103274	2.65933	0.15569	0.326478
210	-0.429441	-0.392868	-0.330804	0.0570078	-0.133549	-0.45233	-1.07532	-2.25311	-0.621125	-1.64048	-3.02706	-3.91438	-2.34712	-3.58478	-4.62076	-5.92733	15.5253	63.9124	1.17e-18	1.41e-17	3.00114	2.29506	0.686517	1.69694	0.10018	0.103293	0.101026	1.38779	1.47228	0.10017	0.53823	2.65979	0.106495	0.550179
211	0.00226492	-0.412461	-0.710023	-0.307894	-0.0855621	-0.336235	-1.19509	-1.73526	-0.115656	-1.30529	-2.86944	-3.56997	-1.76102	-3.01567	-4.30367	-4.8973	14.4246	32.2709	1.72e-14	3.13e-14	2.98108	2.24781	0.101372	0.51737	0.10018	0.103293	0.101026	1.40189	1.29038	0.10017	0.53134	2.63843	0.377547	1.1779
212	-0.0621312	-0.510839	-0.407331	0.0888323	0.126887	-0.331371	-1.30865	-2.06983	-0.0936925	-1.58861	-2.90063	-3.73201	-2.1633	-3.43743	-4.21772	-4.90785	15.9742	83.6746	1.41e-20	6.5e-19	2.9828	2.25054	0.101372	1.20118	0.662504	0.103293	0.101026	1.25688	1.48682	0.10017	0.400591	2.638	0.106495	0.994138
213	-0.286114	-0.614814	-0.0149041	0.0338294	-0.285323	-0.60715	-0.858021	-1.39987	-0.637244	-1.32091	-1.48153	-1.71544	-1.7288	-1.3543	-1.03617	-1.50177	16.683	18.5337	2.86e-11	3.31e-11	2.93516	2.17275	0.101372	0.755534	0.230028	0.103293	0.101026	0.664919	1.31283	0.10017	0.103274	2.60062	0.106495	0.101254
214	0.049785	0.241964	0.273999	-0.421288	-0.342857	-0.200349	-0.122386	-0.301903	-0.112836	0.29855	0.369894	0.0167334	0.769843	1.25555	1.25216	0.511369	16.3297	8.2857	4.71e-07	4.87e-07	2.82082	2.07699	0.101372	0.591485	0.10018	0.103293	0.101026	0.101889	0.100977	0.10017	0.103274	2.57529	0.106495	0.101254
215	-0.453588	-0.580149	-0.275066	0.0679203	-0.0414175	-0.402605	-1.11555	-2.26666	-0.5796	-1.73013	-3.07986	-3.99396	-2.81703	-3.88943	-4.88608	-5.84526	16.661	102.042	1.38e-21	1.77e-19	2.99064	2.26028	0.640336	1.35684	0.10018	0.103293	0.101026	1.30768	1.58016	0.10017	0.103274	2.64178	0.202077	0.646735
216	1.88321	1.37472	0.381635	0.0154526	1.50346	1.56985	0.923083	-0.699739	2.26921	1.3419	0.165192	-2.44042	2.01877	0.840694	-0.794904	-3.13409	12.6811	18.4146	3.11e-11	3.58e-11	3.01896	2.25055	1.10108	1.27536	0.908959	0.103293	0.826535	1.39736	1.38132	0.10017	1.43021	2.66894	0.106495	2.0442
217	-0.650823	-0.501593	-0.0149713	0.0114337	-0.359875	-0.37557	-0.604666	-2.1209	-0.879815	-1.6412	-2.78781	-4.13357	-2.72149	-3.23757	-4.98113	-6.00397	15.0346	77.6077	3.07e-20	1.14e-18	2.98823	2.2539	1.08318	0.100986	0.679438	0.103293	0.101026	1.26153	1.5312	0.10017	0.103274	2.63846	0.333783	0.101254
218	-0.596193	-0.00807677	0.187733	0.0918516	-0.201299	-0.199437	-0.282044	-1.811	-0.720312	-1.1528	-2.28796	-3.47492	-2.26126	-2.79441	-3.83387	-5.57743	15.3328	47.1631	8.77e-17	3.73e-16	3.00872	2.28952	1.22206	1.6663	0.10018	0.103293	0.101026	1.40603	1.40092	0.10017	0.103274	2.65693	0.106495	0.71948
219	-0.61979	-0.37314	0.0118116	0.160429	-0.156311	-0.28104	-0.61228	-2.09143	-0.748298	-1.42063	-2.66237	-3.89014	-2.70421	-3.44132	-4.51373	-5.98166	16.2361	62.5628	1.59e-18	1.8e-17	3.00385	2.27637	1.05736	1.42053	0.10018	0.103293	0.101026	1.36378	1.57391	0.10017	0.103274	2.65618	0.106495	0.860074
220	-0.786065	-0.513313	0.0393907	0.108725	-0.408136	-0.461274	-0.636439	-2.33448	-1.06283	-1.66925	-2.85689	-4.04902	-2.98282	-3.35902	-4.6172	-6.20412	15.8391	72.407	1.96e-19	3.9e-18	3.00556	2.2782	1.14354	1.3616	0.10018	0.103293	0.169657	1.36702	1.55969	0.10017	0.103274	2.66007	0.106495	0.101254
221	0.0951669	-0.483	-0.604907	0.168588	0.183008	-0.17154	-1.33399	-2.05227	0.0748444	-1.5239	-2.70588	-3.67931	-1.76268	-3.35401	-3.77835	-4.99492	13.3987	34.9468	3.57e-15	8.22e-15	2.99747	2.26616	0.101372	1.81989	0.10018	0.103293	0.101026	1.21997	1.55732	0.10017	0.966013	2.64532	0.106495	1.11347
222	-0.465594	-0.812181	-0.47994	0.115177	-0.189646	-0.70091	-1.63259	-2.32943	-0.71249	-2.16241	-3.31978	-3.71565	-2.90943	-4.16797	-4.634	-5.13836	15.898	106.669	2.74e-22	6.8e-20	3.00411	2.2852	0.101372	1.60109	0.10018	0.103293	0.101026	1.29704	1.59482	0.10017	0.103274	2.65968	0.106495	0.101254
223	0.946943	3.01772	2.56721	-1.17429	-0.233081	2.5983	4.39824	6.29389	0.323537	4.83885	6.28912	6.62073	-0.233081	2.58573	4.9988	6.18268	13.1068	73.1462	1.16e-19	2.69e-18	3.14701	2.273	1.63736	1.88328	1.19033	0.103293	0.101026	1.28079	0.996597	0.715825	0.103274	2.62449	0.106495	3.30657
224	-0.220213	-0.135849	-0.138724	0.040795	0.114997	-0.196026	-0.725627	-2.04868	-0.238158	-1.31994	-2.62234	-3.76769	-1.82002	-3.20756	-4.04767	-5.64516	14.7476	53.2989	1.56e-17	1e-16	3.00395	2.28371	0.801696	1.69179	0.10018	0.285427	0.101026	1.31586	1.42174	0.10017	0.720602	2.65298	0.106495	0.89518
225	-0.169337	-0.464174	-0.21561	-0.0498715	0.00177332	-0.540949	-1.14594	-2.11274	-0.414515	-1.6679	-3.05447	-3.73988	-2.21459	-3.26909	-4.35903	-5.242	15.9737	87.0736	6.53e-21	4.67e-19	2.98727	2.26168	0.39714	1.07905	0.609996	0.103293	0.101026	1.34686	1.40115	0.421376	0.103274	2.64002	0.106495	0.101254
226	-0.870325	-0.82659	-0.133007	-0.107812	-0.631336	-0.710143	-0.957831	-2.46291	-1.19911	-1.98679	-3.18149	-4.45712	-3.28742	-3.61082	-5.04411	-6.26562	15.6047	77.213	7.8e-20	2.26e-18	2.99273	2.26565	1.02016	0.100986	0.10018	0.103293	0.101026	1.38181	1.57891	0.10017	0.103274	2.64828	0.106495	0.101254
227	2.54251	2.55579	1.34529	-5.03201	1.60767	2.32948	3.0775	3.43919	3.00092	4.62266	4.01339	2.14025	5.98601	5.89454	4.00664	0.949703	12.3887	45.2824	2.45e-16	8.32e-16	3.05517	2.24046	0.981034	1.53443	0.10018	0.998179	0.130985	1.42617	0.100977	0.872613	1.81599	2.68042	0.26957	3.1578
228	-0.291556	0.218935	-0.0108988	-0.150138	-0.0759052	0.0533407	0.140824	-1.34693	-0.328116	-0.768117	-2.1213	-3.04831	-1.41107	-2.2492	-3.424	-5.41281	12.7319	19.1411	1.88e-11	2.2e-11	3.00818	2.26328	1.30279	0.787862	0.10018	0.103293	0.871797	1.42482	1.29375	0.458979	0.103274	2.66912	0.738781	1.07183
229	2.18767	2.63277	0.860022	-2.10648	1.22238	2.63819	2.61141	3.69488	2.41539	4.27985	3.4165	3.54299	4.12074	3.99841	3.25466	3.23505	13.8932	24.8661	5.93e-13	8.08e-13	3.07147	2.22704	0.101372	1.57039	0.570405	0.635581	0.101026	1.38793	1.29793	0.10017	1.2414	2.64817	0.106495	3.19235
230	1.28085	1.98345	1.86151	-2.76201	0.734662	2.04784	3.67385	2.76617	1.5534	4.07554	4.59138	1.82563	4.11993	5.29871	5.08784	2.34577	13.3969	43.0801	3.13e-16	1.02e-15	3.0773	2.22541	1.78926	1.21308	0.10018	0.674232	0.842332	1.27686	1.23995	0.690064	1.87211	2.6748	0.106495	3.22353
231	-0.597389	-0.903661	-0.986054	-0.116781	-0.344457	-1.04058	-1.80185	-2.28614	-0.804759	-2.49225	-3.7728	-4.24925	-2.91174	-4.51459	-5.20014	-5.77519	13.5315	45.5417	8.2e-17	3.51e-16	2.98791	2.27241	0.101372	0.100986	0.10018	0.103293	0.886923	1.38901	1.58174	0.201237	0.4923	2.64975	0.106495	0.101254
232	0.0739485	-0.0621317	-0.0347841	-0.066062	0.175171	-0.33845	-1.02863	-1.6608	0.0563123	-1.43412	-2.85828	-3.55228	-1.52461	-2.66869	-3.72344	-4.72398	13.978	45.0724	8.35e-17	3.56e-16	2.98631	2.25704	0.374275	1.31785	0.10018	0.610158	0.101026	1.31649	1.24317	0.719712	0.103274	2.63645	0.106495	0.101254
233	-0.221431	0.00359544	0.263025	0.158179	0.134778	-0.0372798	-0.293095	-1.56576	-0.408073	-1.03302	-2.38882	-3.47594	-2.01123	-2.78075	-4.06775	-5.43836	14.4542	46.9829	7.5e-17	3.33e-16	2.98739	2.23031	1.12497	1.1404	0.517157	0.103293	0.101026	1.24469	1.39185	0.719335	0.103274	2.63168	0.57589	0.101254
234	3.62997	2.95749	0.877174	-2.69812	2.46314	3.13912	3.42743	3.81925	3.9274	4.91351	3.9126	2.96583	5.79513	5.62533	4.07409	2.46338	12.4855	32.376	1.28e-14	2.41e-14	3.05088	2.23601	0.101372	1.12025	0.961712	0.103293	0.16423	1.35637	0.271402	0.776581	1.7399	2.67378	0.650279	3.13864
236	-0.613655	-0.370239	0.238541	0.269378	-0.177625	-0.300929	-0.526136	-2.33993	-0.892766	-1.50537	-2.58379	-3.95653	-3.16231	-3.42974	-4.43497	-6.18134	15.316	56.0296	7.66e-18	5.91e-17	3.01299	2.30065	1.22819	1.64793	0.511104	0.103293	0.101026	1.33931	1.63971	0.10017	0.103274	2.66783	0.106495	0.101254
237	1.44689	3.06897	0.913533	-1.08379	0.613155	3.2385	3.19607	4.83377	1.8055	4.39731	3.77367	5.38165	1.69734	2.01804	3.11687	5.21582	13.75	29.4451	6.04e-14	9.7e-14	3.12217	2.2299	0.101372	1.6935	1.06907	0.103293	0.101026	1.21596	1.55738	0.10017	0.103274	2.59833	0.106495	3.27974
238	0.221764	0.62979	0.503568	-0.203813	-0.117669	0.0626837	0.189389	0.0850478	0.227315	0.682218	0.764989	0.422252	1.06532	1.57117	1.67757	0.888644	15.5387	9.66386	8.38e-08	8.85e-08	2.82113	2.09013	0.101372	1.35717	0.10018	0.103293	0.101026	0.101889	0.100977	0.10017	0.103274	2.58827	0.106495	0.101254
239	0.912447	0.834782	-0.140035	-0.241395	0.526945	0.800754	0.839577	0.529445	0.981136	1.31343	0.0410947	-0.920828	0.605816	0.22308	-1.41669	-2.11127	14.1358	12.1502	5.67e-09	6.1e-09	2.9976	2.21147	0.455225	1.1275	0.10018	0.103293	0.101026	1.17599	1.24632	0.232512	0.825712	2.63601	0.106495	2.07329
240	3.34782	2.14236	0.844465	-3.43117	2.11377	2.61816	2.77246	2.58402	3.58987	4.0355	3.48039	1.93476	5.60738	5.23468	3.66017	1.69221	13.5844	37.0352	2.58e-15	6.1e-15	3.05535	2.23353	0.101372	1.59391	0.524702	0.103293	0.101026	1.41008	0.184324	0.10017	1.88812	2.67888	0.106495	3.11002
241	-0.564674	0.233423	0.361048	0.0612615	-0.357271	0.106936	0.69366	-0.542362	-0.556463	-0.398414	-0.867698	-2.48051	-1.96644	-1.8441	-2.47519	-3.84271	14.0045	17.4926	6.03e-11	6.91e-11	3.01579	2.27503	1.42754	0.868675	0.10018	0.103293	0.551717	1.32076	1.41635	0.10017	0.103274	2.66636	0.106495	1.34772
242	-0.155854	-0.301289	-0.0915294	0.0402129	-0.174684	-0.413588	-0.780597	-1.13269	-0.354193	-0.948819	-1.35187	-1.49532	-0.998684	-0.886367	-0.836814	-1.29046	16.7737	14.345	7.41e-10	8.19e-10	2.93362	2.18499	0.101372	1.30668	0.10018	0.103293	0.101026	0.63113	1.14122	0.10017	0.103274	2.62038	0.106495	0.612391
243	-0.55066	-0.489799	0.0702136	0.132373	-0.257481	-0.471811	-0.713338	-2.22058	-0.853873	-1.61371	-2.83019	-3.88869	-2.77981	-3.37049	-4.40176	-5.16102	16.5356	106.671	7.27e-22	1.08e-19	2.99109	2.26114	0.998785	1.184	0.10018	0.103293	0.101026	1.21787	1.52594	0.257795	0.103274	2.64004	0.106495	0.134744
244	-0.231915	-0.609827	-0.400964	0.235902	0.0737111	-0.3541	-1.1448	-1.8569	-0.393625	-1.64461	-2.83218	-3.48539	-2.62032	-3.59825	-3.71501	-4.14182	15.8106	72.3982	1.17e-19	2.69e-18	2.98849	2.24356	0.101372	1.39246	0.10018	0.103293	0.101026	1.16546	1.57365	0.10017	0.103274	2.64548	0.106495	1.03808
245	-0.36208	-0.135547	0.0763532	0.184329	0.0143497	-0.135969	-0.508804	-1.9669	-0.548328	-1.16446	-2.48481	-3.66312	-2.41385	-3.18746	-4.44063	-5.4789	16.5299	54.9049	1.02e-17	7.36e-17	3.00488	2.28582	1.03338	1.49494	0.45747	0.103293	0.101026	1.27788	1.50235	0.10017	0.103274	2.65232	0.106495	0.956252
246	-0.568603	-0.451682	0.104885	0.16914	-0.244237	-0.408275	-0.609196	-2.05225	-0.856081	-1.5392	-2.67638	-3.46111	-2.68015	-3.24823	-4.07971	-4.78421	16.549	95.7243	3.5e-21	3.17e-19	2.99957	2.25216	0.991504	1.52013	0.10018	0.103293	0.101026	1.21633	1.53363	0.10017	0.103274	2.65241	0.106495	0.456239
247	0.121277	0.491881	0.330261	-0.349359	-0.209337	-0.0361667	0.0804917	-0.194537	0.164661	0.447225	0.383654	0.00232034	0.799013	1.19487	1.23379	0.504705	16.1085	6.68263	4.63e-06	4.74e-06	2.83548	2.10413	0.101372	1.25215	0.10018	0.103293	0.101026	0.101889	0.100977	0.10017	0.103274	2.58722	0.106495	0.519027
248	-0.711032	-0.761856	-0.167571	0.069258	-0.455398	-0.622543	-0.968005	-2.19285	-1.00616	-1.92931	-3.00379	-3.53668	-3.05153	-3.40328	-4.31217	-4.22683	16.4179	97.8721	1.68e-21	2e-19	2.97898	2.23079	0.777528	0.857617	0.10018	0.103293	0.157332	1.03347	1.60223	0.10017	0.103274	2.63386	0.106495	0.668362
249	-0.688192	-0.590667	-0.207248	0.0120127	-0.496869	-0.493561	-0.750967	-2.18082	-0.867765	-1.65348	-2.84453	-4.21013	-2.92956	-3.38475	-4.28663	-5.57724	14.993	55.0858	9.76e-18	7.1e-17	2.9884	2.24531	1.04846	0.100986	0.10018	0.103293	0.565245	1.35421	1.57539	0.10017	0.103274	2.64867	0.106495	0.947965
250	-0.643563	-1.04562	-0.953762	-0.0293466	-0.455397	-1.06442	-1.83214	-2.42076	-0.817269	-2.48976	-3.94282	-4.1062	-3.28854	-3.86882	-5.19483	-5.27472	13.3235	44.5518	9.87e-17	4.1e-16	2.99194	2.27748	0.101372	0.100986	0.10018	0.103293	0.897787	1.31331	1.62113	0.590476	0.103274	2.65222	0.106495	0.101254
251	0.260488	0.610006	0.342815	-0.287719	-0.0157683	0.0533289	0.0928652	-0.0126089	0.377125	0.596255	0.569404	0.26453	1.04738	1.44397	1.45739	0.80569	15.9098	8.69745	2.75e-07	2.87e-07	2.81929	2.08646	0.101372	1.29915	0.10018	0.103293	0.101026	0.101889	0.100977	0.10017	0.103274	2.58154	0.106495	0.532684
252	0.71839	3.37321	2.59974	-0.630096	0.0284883	3.02159	4.7343	6.16315	1.16177	4.672	6.04237	6.21433	0.836479	2.62851	4.34712	5.18878	12.9882	39.2316	1.16e-15	3.02e-15	3.10782	2.18055	1.65495	0.100986	0.837617	0.243413	0.101026	1.3538	1.47637	0.523975	0.103274	2.60047	0.568369	3.29311
253	-0.644338	-0.239021	0.362205	0.276832	-0.287414	-0.183943	-0.191828	-1.88485	-1.02896	-1.27537	-2.30785	-3.3387	-2.94943	-3.05671	-3.84063	-5.15772	14.7839	36.6407	2.99e-15	7.05e-15	3.01912	2.28416	1.28724	1.83482	0.10018	0.103293	0.101026	1.21904	1.58535	0.10017	0.103274	2.6679	0.106495	0.502439
254	0.317058	0.615488	0.381093	-0.202904	0.0143244	0.0657468	0.0885667	0.0792012	0.43983	0.67449	0.68755	0.392187	1.18501	1.60342	1.58486	1.01813	15.9708	10.0944	5.07e-08	5.38e-08	2.80944	2.05428	0.101372	1.20692	0.10018	0.103293	0.101026	0.101889	0.100977	0.10017	0.103274	2.57494	0.106495	0.560752
256	0.212958	0.453367	0.325774	-0.279196	-0.117482	-0.0967488	-0.0307897	-0.130832	0.213372	0.508661	0.50286	0.219899	1.00519	1.43905	1.39347	0.73201	16.4378	9.23722	1.4e-07	1.47e-07	2.81901	2.07458	0.101372	0.974324	0.10018	0.103293	0.101026	0.101889	0.100977	0.10017	0.103274	2.58068	0.106495	0.405123
257	-0.414431	-0.594191	-0.0623937	0.195272	-0.292316	-0.649553	-0.967683	-1.22908	-0.695789	-1.55206	-1.7558	-1.60984	-2.31912	-2.06808	-1.54022	-1.83354	15.1586	24.0954	5.54e-13	7.59e-13	2.96331	2.23377	0.101372	1.5359	0.10018	0.103293	0.101026	0.348746	1.42218	0.10017	0.103274	2.6367	0.106495	0.101254
258	0.147001	0.410445	-0.12519	-0.549538	-0.098715	-0.0955569	-0.088236	-0.869388	0.241515	-0.249689	-1.27218	-2.09302	-0.181906	-0.948085	-1.6911	-2.11902	14.5227	11.8271	7.84e-09	8.4e-09	2.97206	2.23137	0.451094	1.51572	0.10018	0.103293	0.101026	1.20188	0.168381	0.10017	0.103274	2.63512	0.106495	1.13956
259	0.285966	0.512888	0.218629	-0.347406	-0.0604846	-0.00585891	-0.0784322	-0.256922	0.281537	0.42396	0.229663	-0.0434919	0.852412	1.15026	1.08545	0.476425	15.9802	6.37682	7.45e-06	7.63e-06	2.8341	2.11136	0.101372	1.31357	0.10018	0.103293	0.101026	0.101889	0.100977	0.10017	0.103274	2.58827	0.106495	0.721293
260	-0.44847	-0.712036	-1.01395	-0.278177	-0.045379	-0.473704	-2.00064	-2.29098	-0.348273	-1.98734	-3.72971	-4.51511	-2.76466	-4.01164	-5.87088	-7.33859	12.8039	39.4743	6.25e-16	1.77e-15	2.99264	2.28094	0.101372	0.230172	0.654103	0.0969104	0.864616	1.40489	1.53029	0.10017	0.831629	2.64385	0.57754	0.101254
262	-0.0774175	0.876039	0.801286	0.192702	0.423565	1.19309	1.43274	0.55191	0.434274	0.898847	0.631039	-0.933881	-1.04549	-1.41321	-1.8523	-2.7336	13.3574	14.6092	5.9e-10	6.55e-10	3.03226	2.29415	1.35455	1.64036	0.354192	0.745306	0.101026	1.2721	1.47036	0.10017	0.240012	2.66453	0.106495	1.6727
263	-0.817276	-0.493011	0.130984	-0.0846734	-0.735691	-0.607672	-0.441901	-1.97431	-1.15643	-1.59547	-2.71592	-4.01345	-2.58123	-2.8362	-4.24226	-5.4402	15.3156	54.9215	1.02e-17	7.34e-17	2.99026	2.24015	1.20863	0.100986	0.10018	0.103293	0.101026	1.30088	1.42449	0.10017	0.103274	2.64019	0.106495	0.101254
264	-0.209006	-0.401316	-0.0864213	0.345455	0.0730268	-0.28091	-0.981066	-2.03462	-0.442083	-1.51118	-2.9373	-3.4337	-2.63273	-3.4181	-3.79811	-4.12989	15.1928	81.2311	1.55e-20	6.94e-19	2.99462	2.27898	0.379926	1.3834	0.797483	0.103293	0.101026	0.954834	1.59354	0.411944	0.103274	2.64417	0.106495	1.02014
265	2.25703	2.18373	0.984622	-4.61261	1.42705	2.48853	2.6227	1.93203	2.88692	3.83855	3.2259	1.44073	4.66033	4.46828	3.96662	1.8824	13.4105	31.7048	2.2e-14	3.87e-14	3.08596	2.30098	1.03022	1.86769	0.10018	0.103293	0.811153	1.45642	1.09837	0.10017	1.88477	2.70094	0.106495	3.16556
266	-0.0259552	-0.449393	-0.391311	0.35903	0.344403	-0.138	-1.28148	-2.04639	-0.0131381	-1.55753	-3.06517	-3.66273	-2.42129	-3.60192	-4.42202	-5.04051	15.0701	69.7455	3.36e-19	5.45e-18	2.99901	2.26486	0.101372	1.55129	0.837283	0.103293	0.213883	1.22451	1.6028	0.133897	0.103274	2.64831	0.106495	1.09182
268	0.174068	0.20138	-0.589546	-0.601824	-0.171649	-0.299773	-0.445182	-1.05285	0.15255	-0.626508	-1.92908	-2.5655	-0.225514	-1.04484	-2.60986	-2.72137	13.0967	11.691	9e-09	9.63e-09	2.97233	2.21357	0.202851	0.100986	0.10018	0.103293	0.558971	1.31692	0.350116	0.10017	0.103274	2.62343	0.106495	1.26157
270	0.226147	0.554043	0.432758	-0.153171	-0.0717661	-0.00403947	0.119925	-6.87e-05	0.267998	0.512998	0.591901	0.333642	0.967019	1.40977	1.49155	0.846647	16.1079	8.81382	2.37e-07	2.48e-07	2.82561	2.0753	0.101372	1.30437	0.10018	0.103293	0.101026	0.101889	0.100977	0.10017	0.103274	2.58374	0.106495	0.189495
271	0.0703958	0.296413	0.315251	-0.446469	-0.229638	-0.149597	-0.0681157	-0.228309	0.0690797	0.530665	0.626654	0.243813	1.04209	1.64723	1.51056	0.73586	15.4478	10.8237	2.25e-08	2.39e-08	2.80169	2.05991	0.101372	0.136221	0.10018	0.103293	0.101026	0.101889	0.100977	0.10017	0.103274	2.56677	0.106495	0.101254
272	0.0885815	0.723333	0.241359	-0.282827	-0.0173822	0.973882	1.20196	0.682525	0.32506	1.15876	0.466043	-1.26198	-0.150839	-0.416736	-1.13703	-2.515	13.8163	14.3479	7.39e-10	8.17e-10	3.02426	2.26005	1.32489	0.100986	0.10018	0.103293	0.101026	1.36986	1.47534	0.10017	0.870168	2.66069	0.106495	2.11731
273	2.76242	2.46785	1.34688	-0.963003	1.84057	2.78057	3.08357	1.6433	3.20088	3.77116	3.23044	0.321727	4.45822	4.01927	2.34836	-0.671214	12.4726	23.7076	1.12e-12	1.47e-12	3.04245	2.28604	1.37614	0.961291	0.782082	0.994714	0.393503	1.43878	1.09737	0.10017	1.77142	2.69497	0.106495	2.96464
274	-0.412822	0.107752	0.353743	0.264124	0.0198943	0.185171	0.0757945	-1.40974	-0.423812	-0.797481	-1.75638	-2.97541	-2.29784	-2.78455	-3.57885	-5.15112	14.8994	27.9107	1.25e-13	1.89e-13	3.01095	2.26776	1.32141	1.72444	0.436065	0.103293	0.101026	1.31629	1.53892	0.10017	0.498942	2.66289	0.106495	1.03016
279	0.33199	0.716915	0.677331	-0.0366695	-0.0343967	0.189062	0.316195	0.199802	0.299274	0.771258	0.965336	0.476978	1.04922	1.62644	1.85932	0.920362	15.3317	10.1742	4.63e-08	4.91e-08	2.826	2.08389	0.101372	1.45049	0.10018	0.103293	0.101026	0.101889	0.100977	0.10017	0.103274	2.58304	0.106495	0.101254
280	-0.0634715	-0.318236	0.355731	0.360316	-0.0785443	-0.307091	-0.380469	-0.524939	-0.293704	-0.837461	-0.444609	-0.635513	-1.19968	-0.506195	0.281893	-0.258009	15.2651	4.01832	0.000515229	0.000518799	2.89953	2.12359	0.101372	1.4	0.363249	0.103293	0.101026	0.101889	1.21609	0.10017	0.103274	2.58583	0.106495	0.101254
283	0.791204	1.97501	1.51115	0.0953943	0.00634717	2.13246	3.56342	3.50726	0.973822	3.26535	3.88142	2.47897	1.04309	2.42258	2.36362	0.958928	13.1384	17.7421	5.02e-11	5.76e-11	3.08212	2.27802	1.7915	1.58631	0.10018	0.103293	0.101026	1.32308	1.49032	0.10017	1.02178	2.68791	0.106495	2.96782
284	0.229163	0.616462	0.467192	-0.163738	-0.0131562	0.069904	0.192027	0.0567786	0.306337	0.609471	0.649248	0.333514	0.987158	1.4288	1.55474	0.914145	15.933	8.30172	4.61e-07	4.77e-07	2.82125	2.08348	0.101372	1.37168	0.10018	0.103293	0.101026	0.101889	0.100977	0.10017	0.103274	2.57321	0.106495	0.37823
285	0.178783	0.414879	0.202561	-0.324936	-0.173399	-0.222358	-0.141379	-0.34034	0.10504	0.231334	0.144267	-0.198776	0.552733	0.871035	0.996605	0.232164	15.365	4.53071	0.000186668	0.000189591	2.85449	2.12531	0.101372	1.61063	0.10018	0.103293	0.101026	0.101889	0.100977	0.10017	0.103274	2.59306	0.106495	0.101254
287	2.96261	2.63868	2.64026	-5.05157	2.25691	3.15416	4.21747	2.66896	3.95709	5.00771	5.33418	1.97192	6.57169	6.90804	5.77923	2.32221	13.2461	48.0846	1.8e-16	6.66e-16	3.07148	2.23832	1.51006	1.41311	0.565151	0.944224	0.67062	1.47535	0.100977	0.10017	2.02147	2.69678	0.106495	3.21126
288	-0.00813565	2.85988	2.53891	0.0710459	-0.387317	2.68221	4.2033	5.9791	0.902941	4.18447	6.21774	7.11147	1.44082	3.04227	5.75088	6.88682	14.6452	96.5478	3.09e-21	2.88e-19	3.15076	2.20116	1.64746	2.21043	0.756352	0.103293	0.101026	1.2029	1.44481	0.10017	0.433339	2.51711	0.106495	3.3111
289	1.96444	2.60966	1.63487	-4.39112	1.10577	2.52103	3.01869	4.90756	1.64263	4.06696	5.28098	6.46823	3.26839	3.77582	5.81463	6.87105	12.5201	40.3471	1.95e-15	4.74e-15	3.14934	2.18916	1.06799	2.35377	1.23038	0.103293	0.101026	1.16172	0.926707	0.569114	1.0492	2.53281	0.106495	3.30411
290	0.265211	0.840251	0.764858	0.0884147	0.0662433	0.434714	0.750541	0.226127	0.369981	0.924317	1.38854	0.573302	0.951693	1.86628	2.26217	1.23959	13.009	6.96035	3.04e-06	3.12e-06	2.81948	2.05692	0.101372	1.48526	0.697183	0.103293	0.098995	0.101889	0.100977	0.534931	0.103274	2.55045	0.106495	0.101254
292	2.32942	1.95812	1.3078	-1.80935	0.941373	2.3832	3.09307	2.43165	2.55757	3.80592	3.32359	1.65062	3.94454	4.10537	3.53192	1.63443	13.9008	34.54	4.68e-15	1e-14	3.07855	2.26624	1.41626	1.33033	0.10018	0.103293	0.101026	1.41077	1.51334	0.10017	1.89743	2.69521	0.106495	3.1889
293	0.201219	0.323512	0.254189	-0.423744	-0.131656	-0.157814	-0.146406	-0.239485	0.138794	0.445265	0.465107	0.155994	0.998478	1.46525	1.35846	0.740514	15.9977	9.15469	1.55e-07	1.62e-07	2.80425	2.05271	0.101372	0.100986	0.10018	0.103293	0.101026	0.101889	0.100977	0.10017	0.103274	2.56251	0.106495	0.397451
295	0.092111	0.291119	0.61418	-0.446668	-0.320023	-0.247977	0.103107	-0.261212	-0.0245165	0.699016	0.980297	0.456385	1.13283	1.88355	1.91486	0.836216	14.7248	13.138	2.19e-09	2.39e-09	2.79561	2.00466	0.101372	0.100986	0.10018	0.103293	0.101026	0.101889	0.100977	0.10017	0.103274	2.54704	0.106495	0.101254
297	3.50285	2.01341	2.06383	-1.3448	2.45376	3.18873	3.6869	2.17458	3.72596	4.61282	4.58787	1.29447	6.51826	6.4019	5.16584	1.82665	12.8786	47.5586	7.8e-17	3.39e-16	3.04307	2.1771	1.25623	0.100986	0.10018	0.356773	1.06055	1.39531	0.435062	0.10017	1.99074	2.65629	0.106495	3.14371
299	-0.0739101	0.00161623	0.232843	-0.167235	-0.37166	-0.342811	-0.273985	-0.385511	-0.272892	-0.0360447	0.116981	-0.132757	0.352037	0.880365	0.962078	0.340964	16.556	5.15408	5.86e-05	5.96e-05	2.82959	2.08659	0.101372	0.713913	0.10018	0.103293	0.101026	0.101889	0.100977	0.10017	0.103274	2.5712	0.106495	0.101254
300	0.165291	0.367851	0.431628	-0.345577	-0.260166	-0.144835	0.0594697	-0.113504	0.0374636	0.527566	0.712256	0.279166	0.962862	1.54951	1.62673	0.8076	16.1903	11.1298	1.62e-08	1.73e-08	2.80875	2.05294	0.101372	0.669706	0.10018	0.103293	0.101026	0.101889	0.100977	0.10017	0.103274	2.56391	0.106495	0.101254
301	1.8971	1.99855	1.67314	-1.60299	0.656725	2.46905	3.61216	3.41376	2.22001	4.20135	4.31997	3.01578	3.88855	4.77539	4.44441	2.687	14.0104	36.0528	3.74e-15	8.51e-15	3.08373	2.24636	1.67438	1.09892	0.10018	0.157775	0.101026	1.41845	1.41305	0.10017	1.74733	2.66093	0.251587	3.22831
303	-0.122457	0.27732	0.126722	-0.655555	-0.388229	-0.358518	-0.192963	-0.633511	-0.154753	0.231562	0.00914231	-0.16304	0.766374	1.14117	0.84905	0.178044	14.9985	6.10461	1.15e-05	1.18e-05	2.82923	2.10198	0.101372	0.100986	0.10018	0.103293	0.101026	0.101889	0.100977	0.10017	0.103274	2.57659	0.106495	0.511902
305	2.83054	3.5743	2.7258	-4.39072	1.73488	3.04971	4.32779	4.89145	2.78844	5.27532	6.09411	5.54799	5.00061	6.04288	6.7499	5.53817	12.8205	36.8966	6.48e-15	1.35e-14	3.10547	2.21817	1.49228	2.05632	0.10018	0.366377	0.101026	1.41097	0.999097	0.715811	1.45668	2.60375	0.106495	3.242
306	2.80785	3.0053	1.83557	-2.01242	2.55353	3.13606	4.18947	3.57845	3.80656	5.17652	4.75882	3.03514	6.00128	6.09831	5.56447	3.68331	12.2497	28.6553	8.74e-14	1.36e-13	3.07252	2.19797	1.37005	1.18525	0.10018	0.989113	0.101026	1.46608	1.37925	0.507228	1.96531	2.64859	0.539154	3.24115
308	2.9874	2.74836	2.75929	-0.69222	1.45064	3.4081	4.78235	4.1364	2.5282	5.02046	5.51528	3.61026	4.90803	6.03652	5.89497	3.37236	12.281	30.7427	3.35e-14	5.61e-14	3.07148	2.21089	1.72784	0.100986	0.10018	0.103293	0.885051	1.12368	1.30044	0.10017	1.7923	2.67358	0.522523	3.17788
309	1.81346	2.58102	2.56551	-1.65146	1.20832	2.67979	4.33787	4.69377	2.2211	4.83907	5.93481	4.58651	4.29797	5.90119	5.80233	4.0423	13.8894	43.2151	3e-16	9.84e-16	3.08887	2.22027	1.72024	1.81675	0.10018	0.103293	0.101026	1.25801	0.425586	0.10017	1.48713	2.65692	0.106495	3.17629
310	2.76175	1.88566	1.01909	-2.76512	1.58844	2.42307	3.06048	1.24958	3.11935	3.88499	3.51311	1.04699	5.57612	5.1495	4.54189	2.25498	12.8858	49.1618	2.39e-17	1.4e-16	3.05476	2.21429	1.23268	0.100986	0.800249	0.817931	0.952019	1.34902	1.34454	0.10017	2.08144	2.68209	0.106495	3.2117
311	2.12207	3.72908	1.26594	-0.79165	1.38141	3.39546	3.79896	5.50567	2.37787	5.17648	4.84813	6.0303	3.38254	4.18889	4.71673	5.9461	13.7076	28.832	8.04e-14	1.26e-13	3.11029	2.1848	0.112667	1.38013	0.936277	0.103293	0.101026	1.29162	1.31269	0.521815	0.683845	2.56595	0.106495	3.29769
313	2.97013	2.57494	1.94312	-2.06943	1.63058	2.57494	3.70147	3.31658	3.3694	4.68179	5.10146	3.4486	5.46177	6.13273	6.4613	4.76229	12.3588	35.2642	5.08e-15	1.08e-14	3.07622	2.19624	1.67621	0.722932	1.2093	0.136917	1.0248	1.39378	0.997951	0.10017	1.85259	2.63322	0.106495	3.24516
314	-0.194506	-0.261373	0.167985	0.146094	-0.266073	-0.392208	-0.527479	-0.730199	-0.505993	-0.640047	-0.62382	-0.773543	-0.615985	-0.11515	0.147489	-0.363779	16.2562	3.08393	0.00383644	0.00385023	2.89168	2.14627	0.101372	1.35695	0.10018	0.103293	0.101026	0.101889	0.976749	0.10017	0.103274	2.59876	0.106495	0.101254
317	2.90252	3.03831	2.84691	-3.16075	2.30046	3.09998	4.4707	3.72102	3.17132	4.80397	5.63445	3.55092	5.24548	6.0185	6.32458	4.17913	13.4638	37.0426	2.57e-15	6.09e-15	3.09431	2.25459	1.75849	1.73935	1.06167	0.786815	0.354126	1.45809	1.16832	0.10017	1.91454	2.68237	0.106495	3.25186
318	1.9512	2.36484	2.16049	-3.40607	0.930054	2.5804	4.05494	3.52241	2.44675	4.31805	5.30052	3.54123	4.07436	5.2812	5.8269	3.97418	13.1714	36.1344	3.63e-15	8.27e-15	3.1138	2.25303	1.81964	1.71151	1.03107	0.103293	0.101026	1.4563	1.31341	0.398068	1.91696	2.68907	0.106495	3.29976
319	2.00897	2.91313	2.36066	-0.874657	1.03791	2.93721	4.16782	5.30745	2.0256	4.79202	5.81131	5.72319	3.90581	4.96133	5.7003	5.6371	15.0362	58.9674	3.7e-18	3.38e-17	3.11108	2.203	1.58039	1.696	0.958647	0.103293	0.101026	1.25491	1.12751	0.10017	1.1473	2.6106	0.106495	3.27353
320	0.182149	0.506552	0.505575	-0.24417	-0.142987	-0.0153644	0.120581	-0.0106847	0.169941	0.638926	0.778323	0.403855	1.04663	1.59775	1.7111	0.903758	16.2796	11.8446	7.7e-09	8.26e-09	2.81005	2.06496	0.101372	1.04321	0.10018	0.103293	0.101026	0.101889	0.100977	0.10017	0.103274	2.5689	0.106495	0.101254
321	2.78119	2.87236	2.47029	-2.22662	1.70301	3.00699	4.21207	3.74967	3.13693	4.95587	5.39877	3.53548	5.4129	6.25303	5.71915	3.35469	14.7083	56.4612	6.87e-18	5.42e-17	3.07258	2.22859	1.6034	1.58752	0.240869	0.482274	0.101026	1.33411	0.74751	0.10017	1.82595	2.65138	0.106495	3.18714
323	2.31432	6.24307	6.45492	2.33673	3.69994	6.29125	7.88624	9.81924	5.01112	8.22452	10.7261	10.9972	6.17889	8.49597	10.4112	10.9877	12.6615	51.3812	7.26e-17	3.24e-16	3.15378	2.1602	1.53913	2.34544	0.870115	0.776227	0.101026	1.1675	0.25878	0.10017	0.887542	2.55693	0.297188	3.32613
325	2.97492	3.00477	2.65282	-2.18805	2.07424	3.17684	4.35252	4.11486	3.42699	5.05642	5.89351	4.42165	5.69462	6.68323	6.85928	4.81012	13.7556	50.8738	3.01e-17	1.65e-16	3.08791	2.18438	1.64075	1.73876	0.778759	0.103293	0.101026	1.43451	0.527891	0.10017	1.83564	2.62099	0.106495	3.2306
326	3.67092	2.52766	2.26574	-4.85039	2.36721	3.39722	4.07301	3.02456	3.98832	5.14108	5.34827	2.8234	6.27823	6.66125	6.4038	3.81928	13.094	37.3222	5.56e-15	1.17e-14	3.06344	2.18163	1.45344	1.47091	1.01643	0.103293	0.913335	1.39355	0.100977	0.185683	1.93548	2.66109	0.337424	3.20988
328	0.011933	2.41038	1.12398	-2.18072	0.00397113	2.10285	3.63078	4.81675	0.483694	4.08826	4.96462	5.31376	0.480007	2.60858	4.08747	4.69657	12.4292	39.017	1.25e-15	3.23e-15	3.07981	2.09618	1.32242	1.17805	0.10018	0.103293	0.101026	1.40503	1.30338	0.10017	0.103274	2.5273	0.249304	3.25038
329	2.30714	2.286	2.11996	-1.82384	1.40939	2.5861	3.86438	3.21031	2.51186	4.34362	4.69837	3.4184	4.37767	5.20573	5.4465	3.93341	14.1292	45.5923	1.41e-16	5.54e-16	3.09156	2.22334	1.70526	1.37264	0.81496	0.436148	0.101026	1.28996	1.42486	0.10017	1.88869	2.64301	0.106495	3.25604
330	2.83638	3.22358	4.1667	-3.15428	2.75981	4.00842	5.17102	4.58881	3.94038	5.3556	6.71237	5.06003	6.13904	6.87799	8.19802	6.34648	12.3966	29.0237	1.58e-13	2.36e-13	3.12157	2.20681	1.763	2.04105	0.923604	1.03184	0.917303	1.37148	1.28639	0.10017	1.888	2.62776	0.609983	3.30542
331	2.59271	1.81968	0.457346	-3.47867	1.53249	2.35999	2.81092	2.17621	2.9799	3.75859	3.19137	1.86823	4.69508	4.45698	4.13213	2.79943	13.2058	35.1227	3.63e-15	8.27e-15	3.06318	2.22998	1.17584	0.100986	1.08418	0.103293	0.804981	1.33412	1.31238	0.10017	1.92258	2.67971	0.24774	3.19877
332	-0.00603978	3.7661	4.09226	0.290365	-0.396549	3.51433	5.77539	7.82688	0.551134	5.40694	8.03509	8.1236	1.12054	3.97884	6.36198	7.39356	13.7285	74.7905	1.23e-19	2.79e-18	3.15379	2.24126	1.84514	1.93642	1.02206	0.103293	0.101026	1.36624	1.17446	0.10017	0.103274	2.62744	0.135112	3.33275
333	0.199702	2.50889	2.14734	-0.984734	-0.395737	2.52769	4.33501	5.60187	0.239301	4.3846	5.36915	5.26018	0.906639	2.91782	3.98993	4.4278	14.6672	43.7752	2.5e-16	8.39e-16	3.10213	2.22706	1.68027	0.653334	0.144621	0.103293	0.101026	1.22361	1.41086	0.10017	0.23352	2.6219	0.106495	3.23312
335	3.11401	2.10718	1.97643	-2.32082	1.96229	2.86437	3.96022	2.51837	3.19585	4.39706	4.58186	1.64592	5.43803	5.83475	4.38802	0.90024	13.6989	44.1876	2.19e-16	7.75e-16	3.0492	2.19617	1.50915	0.100986	0.10018	0.103293	0.101026	1.36512	0.580127	0.10017	1.97469	2.67021	0.106495	3.11773
336	3.07285	2.35247	1.17663	-2.02741	2.12859	2.85789	3.13136	2.42891	3.55295	4.29132	3.56398	2.10653	4.96915	4.50715	4.18241	2.96121	13.9113	31.6042	2.3e-14	4.02e-14	3.07158	2.22986	1.08318	1.37245	1.02733	0.34532	0.101026	1.39444	1.46323	0.515894	1.962	2.68887	0.162707	3.21812
338	-0.00775498	2.61433	2.16491	-0.416087	-0.172314	2.4241	4.21278	5.81378	0.46148	4.34627	5.53388	5.62037	1.00917	2.53324	4.09776	4.92763	14.669	42.5416	3.73e-16	1.16e-15	3.12834	2.26154	1.69429	1.31671	0.8824	0.646646	0.101026	1.32602	1.40436	0.10017	0.236124	2.62831	0.106495	3.31235
339	0.18872	0.374019	0.571239	-0.339071	-0.140677	-0.0302558	0.0328856	0.221615	0.114082	0.701362	1.05678	0.365663	1.19929	1.9449	2.04613	1.28124	14.0003	10.115	4.95e-08	5.25e-08	2.7923	2.02606	0.101372	1.0485	0.10018	0.103293	0.101026	0.101889	0.100977	0.10017	0.103274	2.52547	0.106495	0.101254
340	0.107285	0.29586	0.333164	0.0758376	-0.0951806	-0.0856967	-0.0992535	-0.203294	0.0459809	0.174537	0.106755	-0.108323	0.407957	0.833011	0.994131	0.388183	16.2314	4.0684	0.000465342	0.000468695	2.84995	2.11445	0.101372	1.39091	0.10018	0.103293	0.101026	0.101889	0.100977	0.10017	0.103274	2.58835	0.106495	0.47912
341	-0.428051	-0.860282	-0.437663	-0.0558736	-0.189918	-0.64451	-1.45358	-2.30994	-0.66013	-1.98519	-3.31959	-3.86781	-2.96226	-3.68215	-5.13453	-5.26038	15.3575	90.513	3.13e-21	2.9e-19	2.97991	2.23865	0.108678	0.100986	0.10018	0.103293	0.101026	1.28957	1.5483	0.53955	0.103274	2.63071	0.106495	0.634044
342	-0.186068	0.439816	0.404669	-0.557015	-0.24489	-0.141366	0.0107966	-0.188597	0.00023425	0.681011	0.572808	0.212785	0.823425	1.36556	1.50403	0.444718	12.7073	6.23285	8.03e-06	8.22e-06	2.83619	2.12612	0.101372	0.100986	0.10018	0.700027	0.101026	0.101889	0.100977	0.10017	0.103274	2.58114	0.106495	0.101254
343	0.133849	0.425017	0.391498	-0.27653	-0.205241	-0.0752304	0.0408046	-0.0994736	0.0789293	0.456409	0.586231	0.257791	0.916051	1.43803	1.4778	0.710836	16.4275	9.65754	8.44e-08	8.92e-08	2.81692	2.07436	0.101372	1.03732	0.10018	0.103293	0.101026	0.101889	0.100977	0.10017	0.103274	2.57819	0.106495	0.101254
344	-0.113361	2.03463	2.65688	-0.0108153	-2.23855	2.1306	4.13002	6.06953	-0.00901556	3.97674	6.02238	6.4097	0.398058	2.14372	4.58226	5.69398	13.8248	47.5397	7.84e-17	3.4e-16	3.15301	2.24857	1.7811	1.95047	0.656914	0.749845	0.101026	1.33448	1.50557	0.10017	0.103274	2.60996	0.106495	3.35334
345	0.199856	2.62645	1.97086	-1.66344	-0.202799	2.38263	4.28434	5.46705	0.544979	4.21866	5.49836	4.78076	1.26651	3.45542	3.96421	3.80074	13.5035	32.3425	1.67e-14	3.05e-14	3.09823	2.23462	1.71628	0.100986	0.12693	0.103293	0.101026	1.3475	1.16763	0.584262	0.527214	2.64215	0.106495	3.21318
346	2.10572	2.49744	0.374926	-2.60183	1.07847	2.35972	2.49188	3.13591	2.35836	4.01585	2.66399	2.85546	4.08086	3.81048	2.85374	2.48415	13.2564	19.3364	1.65e-11	1.93e-11	3.06329	2.2422	0.101372	1.0761	0.10018	0.602159	0.524674	1.38634	1.53924	0.10017	1.31137	2.65105	0.106495	3.18116
347	0.112704	0.299141	0.416286	-0.41635	-0.240644	-0.177484	0.0167232	-0.136217	0.0614983	0.549767	0.743319	0.30603	1.02824	1.67826	1.62594	0.815352	15.6112	11.4471	1.16e-08	1.24e-08	2.79648	2.03285	0.101372	0.100986	0.10018	0.103293	0.101026	0.101889	0.100977	0.10017	0.103274	2.55925	0.106495	0.101254
348	0.17918	0.319377	0.189712	-0.408765	-0.169804	-0.194981	-0.211131	-0.33451	0.0991247	0.409892	0.38511	0.0638037	0.943095	1.39837	1.24493	0.615927	15.9162	8.32915	4.45e-07	4.6e-07	2.81499	2.06291	0.101372	0.100986	0.10018	0.103293	0.101026	0.101889	0.100977	0.10017	0.103274	2.56987	0.106495	0.552875
350	3.00716	1.8819	0.620573	-4.22723	1.81475	2.45358	2.61536	2.2122	3.27621	3.82393	2.64014	1.6201	5.17744	4.63527	2.94555	1.12459	13.9411	51.6497	1.95e-17	1.21e-16	3.03056	2.2139	0.387891	0.100986	0.10018	0.299063	0.101026	1.43307	1.26675	0.10017	1.87237	2.65528	0.106495	3.1136
351	-0.22978	-0.44257	-0.128267	0.172417	0.0262982	-0.376193	-1.0304	-2.13798	-0.387256	-1.62384	-2.93558	-3.43328	-2.36348	-3.41683	-4.14131	-5.05179	15.9622	98.3209	9.19e-22	1.29e-19	2.99892	2.25921	0.5526	1.75481	0.442289	0.103293	0.101026	1.33275	1.50829	0.10017	0.103274	2.64501	0.106495	0.45338
352	2.73387	2.97694	1.81087	-2.31734	1.89337	3.02731	3.47015	3.55742	3.19585	4.54083	4.52727	3.61415	4.48624	4.42235	5.02215	4.07855	13.5831	22.9742	1.71e-12	2.2e-12	3.11375	2.27627	1.4082	1.74527	1.1278	0.103293	0.229271	1.43277	1.43832	0.503736	1.82672	2.70199	0.322564	3.26652
353	1.84973	2.62352	1.70063	-0.762935	0.0126842	2.59635	3.99366	4.59354	1.75446	4.33383	4.91002	4.03229	3.10261	4.2961	4.68075	3.5234	13.4232	26.948	2.01e-13	2.93e-13	3.08786	2.22486	1.70353	0.100986	0.796983	0.103293	0.717286	1.3282	1.31913	0.10017	1.17383	2.66353	0.481691	3.19847
354	3.43178	2.73366	2.48397	-0.6816	1.99258	2.66723	4.42179	3.71827	3.80159	5.01569	5.27503	2.78479	6.3032	6.75535	5.34299	2.34134	12.4902	34.0693	8.18e-15	1.65e-14	3.05246	2.17985	1.32699	1.26586	0.144041	0.367906	0.511546	0.476341	0.100977	0.240724	1.89932	2.65506	0.106495	3.11363
355	0.110878	0.265155	0.328446	-0.403971	-0.254616	-0.213787	-0.0944163	-0.250637	0.00554018	0.380581	0.489929	0.121128	0.860792	1.39841	1.36737	0.624176	16.1662	9.51924	9.95e-08	1.05e-07	2.81551	2.06404	0.101372	0.350963	0.10018	0.103293	0.101026	0.101889	0.100977	0.10017	0.103274	2.57258	0.106495	0.101254
356	0.757044	2.99108	2.08845	-0.982408	-0.932679	2.64878	4.14086	5.6559	1.11502	4.51067	5.82496	5.91463	1.31414	2.97597	4.45832	4.81334	13.9717	40.702	6.93e-16	1.91e-15	3.12636	2.22942	1.59339	1.9588	0.10018	0.295425	0.101026	1.31981	1.38817	0.10017	0.50821	2.62211	0.639283	3.27732
357	-0.303564	-0.541911	0.161866	0.279044	-0.248444	-0.492766	-0.671269	-0.863762	-0.588744	-1.08075	-1.11936	-1.09082	-1.3836	-0.954083	-0.524118	-0.847671	15.7299	7.14051	2.33e-06	2.39e-06	2.92595	2.1489	0.101372	1.44824	0.10018	0.103293	0.101026	0.176113	1.32767	0.10017	0.103274	2.61155	0.106495	0.101254
358	-0.855692	-0.463746	0.198815	-0.0318967	-0.7477	-0.529081	-0.322991	-1.81084	-1.24623	-1.62653	-2.57252	-3.61731	-2.77896	-2.8435	-4.08062	-5.0839	15.3916	58.2412	4.42e-18	3.78e-17	2.99306	2.24749	1.23662	0.100986	0.10018	0.103293	0.101026	1.16658	1.43398	0.10017	0.103274	2.64268	0.106495	0.101254
362	-0.410731	-0.276886	-0.00768816	0.0416014	-0.18187	-0.254788	-0.609483	-2.03023	-0.524242	-1.20999	-2.32999	-3.76225	-2.4445	-3.12624	-4.14492	-5.28862	14.6248	45.1958	1.6e-16	6.1e-16	2.99892	2.27716	1.02651	0.100986	0.76791	0.103293	0.114201	1.15487	1.49008	0.342922	0.103274	2.6459	0.106495	1.15084
363	3.72368	1.82478	1.14448	-2.14467	2.39213	2.62908	3.06928	2.29288	3.94596	4.14036	3.71313	1.58078	6.04179	5.628	4.24429	1.97378	13.141	39.1917	1.17e-15	3.05e-15	3.05012	2.19357	0.101372	1.72722	0.10018	0.103293	0.101026	1.34455	0.291843	0.10017	1.96784	2.66518	0.106495	3.10688
364	-0.529771	3.90066	3.86938	0.3878	0.689035	3.35454	5.48672	7.39105	0.693397	5.5484	7.81472	7.60881	0.389288	4.34434	6.13241	6.26134	12.956	58.9229	3.74e-18	3.38e-17	3.14471	2.27129	1.77379	2.00124	0.10018	0.103293	0.101026	1.30802	1.00289	0.581802	0.103274	2.61934	0.384383	3.27588
365	3.02393	2.37483	1.25479	-2.01854	2.09799	2.76343	2.90845	1.78445	3.50708	4.15383	3.31778	1.36893	4.94327	4.49144	3.8968	2.11354	14.2019	49.4083	2.63e-17	1.48e-16	3.074	2.27097	1.07706	1.54125	0.790428	0.216855	0.101026	1.48353	1.44377	0.10017	1.99428	2.6997	0.106495	3.20614
366	2.38414	2.2266	0.958309	-1.39792	1.51833	2.68118	3.10918	2.00511	3.26937	4.20896	3.82237	2.03349	5.48015	4.94556	4.06708	2.38622	12.42	33.7262	6.53e-15	1.35e-14	3.05255	2.23094	1.20495	0.100986	0.811281	1.07028	0.13697	1.45823	1.37376	0.10017	1.98951	2.682	0.38438	3.21201
367	-0.298845	-0.601528	-0.259997	-0.15454	-0.309964	-0.71866	-1.06331	-1.86959	-0.58587	-1.61303	-2.28686	-2.5863	-1.74901	-2.07165	-2.36727	-2.89361	16.3663	54.9994	4.7e-18	3.97e-17	2.9602	2.20492	0.101372	0.100986	0.194694	0.103293	0.101026	1.19255	1.29099	0.10017	0.103274	2.625	0.106495	0.101254
368	1.61435	3.59851	2.09826	-0.460644	0.775334	3.36716	4.12307	5.9212	1.96811	5.12927	5.63722	5.82744	2.31128	3.39812	4.73396	5.06932	13.3314	32.6085	1.49e-14	2.76e-14	3.12026	2.26505	1.54871	1.49289	0.973952	0.103293	0.101026	1.37349	1.4485	0.860425	0.822484	2.62979	0.674902	3.30658
369	0.424643	2.39262	1.62902	-2.64589	0.267152	2.24352	3.68574	4.55895	0.640368	4.15921	4.79503	3.92877	2.23865	3.61464	3.77613	2.91683	12.5455	26.1636	2.99e-13	4.3e-13	3.0906	2.23943	1.70565	0.100986	0.10018	0.596046	0.101026	1.34966	1.33523	0.856134	1.00616	2.65374	0.106495	3.24193
370	3.24891	2.79264	1.27878	-2.90741	1.82175	3.12623	3.81399	2.66539	3.69801	4.69226	4.37609	2.07814	5.24682	5.48174	4.48828	1.83293	13.3518	33.1175	1.21e-14	2.3e-14	3.06112	2.19877	1.2925	1.67946	0.10018	0.103293	0.101026	1.29899	0.995371	0.10017	1.96146	2.67963	0.722367	3.14102
373	0.0683431	2.61731	2.06315	-0.889465	-0.434477	2.54186	4.26325	5.54244	0.405531	4.14496	5.41502	5.3934	0.390029	2.42892	3.76532	4.33465	14.6811	52.8553	1.75e-17	1.1e-16	3.10754	2.22507	1.64997	1.44861	0.100272	0.103293	0.101026	1.10053	1.41029	0.10017	0.103274	2.621	0.106495	3.2243
374	-0.289962	2.84335	2.40014	-0.664848	-0.294871	2.50774	4.42656	6.18457	0.388849	4.40883	5.92918	6.18003	0.387406	2.31	4.52482	5.27026	13.8678	49.5553	4.36e-17	2.21e-16	3.12713	2.22327	1.74378	1.41582	0.909309	0.103293	0.101026	1.35506	1.53109	0.10017	0.103274	2.61349	0.552193	3.31928
375	0.624222	2.70365	2.91756	-0.0255441	0.433154	2.49684	4.6386	6.0601	1.08462	4.855	6.68895	5.93287	1.42301	4.20163	5.22622	4.76256	12.5135	49.6253	4.28e-17	2.2e-16	3.10492	2.21248	1.71125	1.54821	0.10018	0.103293	0.101026	1.32007	0.135359	0.685699	0.103274	2.61678	0.106495	3.18585
376	2.24029	2.06007	0.860273	-2.85118	1.19071	2.36153	2.95189	3.07962	2.53607	4.06776	3.66538	2.30111	4.6114	4.71222	3.38504	1.77156	14.766	46.676	1.02e-16	4.19e-16	3.04869	2.20619	1.11118	0.841578	0.10018	0.116018	0.101026	1.34004	0.923687	0.502362	1.68522	2.66153	0.106495	3.13154
377	-0.296651	0.093749	0.301576	0.029743	-0.0601083	-0.19301	-0.15686	-1.61196	-0.377969	-0.951682	-2.14	-3.21423	-1.57374	-2.43129	-3.73962	-4.82689	15.7961	51.3182	2.66e-17	1.5e-16	2.99437	2.24628	1.12557	1.55495	0.381127	0.103293	0.101026	1.31363	1.25258	0.10017	0.103274	2.64387	0.106495	0.710955
378	3.7035	3.01943	2.91462	-2.56395	2.94695	3.79632	4.80579	3.46151	4.14344	5.42463	5.7995	3.0925	6.08378	6.63481	6.13857	3.77026	13.1918	31.9796	1.95e-14	3.52e-14	3.07699	2.21892	1.6299	1.22399	1.09199	0.103293	0.101026	1.34913	0.554398	0.10017	1.96305	2.68852	0.106495	3.19568
379	1.45831	2.7786	2.56267	-5.03822	0.173849	2.66641	4.36915	5.70117	1.56353	4.64934	5.89843	4.80521	2.72795	4.68395	4.43809	3.77827	12.6308	28.7745	1.77e-13	2.6e-13	3.08273	2.20824	1.63499	0.309244	0.10018	0.786749	0.101026	1.29831	0.100977	0.37821	0.700808	2.63175	0.106495	3.19115
380	-0.412825	-0.299619	0.0432123	0.0452377	-0.200477	-0.427228	-0.736231	-2.09449	-0.620992	-1.49218	-2.84435	-3.88581	-2.26859	-3.21668	-4.30902	-6.22254	16.0198	63.5352	1.28e-18	1.47e-17	3.00326	2.28023	0.981237	1.28173	0.346021	0.103293	0.101026	1.38533	1.42319	0.10017	0.103274	2.65619	0.106495	0.101254
382	0.93902	3.053	1.70547	-2.54826	0.170536	2.88529	3.66669	5.39708	1.26317	4.46358	4.98035	5.62305	1.29325	2.35692	3.70917	4.77528	13.5532	38.1185	1.73e-15	4.26e-15	3.11388	2.20723	1.16275	1.67198	0.10018	0.103293	0.101026	1.31304	1.44428	0.7102	0.103274	2.59506	0.16298	3.28334
383	1.00816	2.30776	0.360937	-1.92126	0.387449	2.02793	2.89479	4.12	1.45212	3.74007	3.02731	4.11144	2.01836	2.68016	2.29568	3.82533	13.4858	22.3961	2.39e-12	3.01e-12	3.06951	2.18425	0.101372	0.100986	0.839553	0.103293	0.101026	0.939998	1.20385	0.10017	0.381295	2.59549	0.106495	3.12967
384	2.87657	1.87825	0.843253	-3.04529	1.78547	2.47907	3.23224	1.96076	3.2262	3.93835	3.42588	1.28623	4.87687	4.57324	3.48869	1.44382	13.7122	35.8253	4.08e-15	9.13e-15	3.05474	2.22587	1.21604	0.100986	0.782207	0.103293	0.101026	1.44815	1.18831	0.178596	1.99792	2.69482	0.434907	3.16265
385	0.965508	2.56552	2.87449	-9.37e-11	-0.225069	2.984	4.83328	5.99761	1.22698	4.1817	5.84738	5.734	1.77364	4.00043	4.5247	5.04271	12.8595	40.9839	6.29e-16	1.77e-15	3.09646	2.20222	1.73823	0.100986	0.10018	0.103293	0.101026	0.451213	1.266	0.10017	0.493042	2.61349	0.106495	3.1428
387	-0.123213	-0.445598	-0.80077	-0.125326	-0.0633269	-0.437071	-1.21807	-1.89558	-0.239233	-1.58748	-3.29815	-3.44366	-1.63382	-3.17441	-4.41227	-4.82974	13.711	31.7856	2.12e-14	3.77e-14	2.98093	2.25134	0.101372	0.100986	0.10018	0.103293	0.81413	1.31019	1.33708	0.618695	0.293098	2.6381	0.106495	1.04917
388	1.72075	1.88781	0.309393	-2.96292	0.929015	1.91807	2.76382	3.7109	2.22184	3.88982	3.37081	2.87582	4.24829	4.56651	2.74591	1.85033	13.0923	23.9447	9.83e-13	1.3e-12	3.01507	2.17095	0.43584	0.100986	0.10018	0.103293	0.101026	1.21953	0.100977	0.10017	1.24178	2.60494	0.106495	3.01253
390	0.0701714	0.0503879	0.240006	-0.0819278	-0.177698	-0.306875	-0.279882	-0.596551	-0.117804	-0.0752767	0.024169	-0.359664	0.193684	0.648455	0.740564	-0.162101	15.212	3.53824	0.00140875	0.00141611	2.8473	2.11615	0.101372	0.100986	0.476894	0.103293	0.101026	0.101889	0.257606	0.10017	0.103274	2.58608	0.106495	0.518479
391	2.9295	1.97141	0.794336	-2.67084	1.85235	2.2622	2.54625	1.12818	3.10804	3.40892	2.42808	0.254158	5.4003	4.71769	2.88295	1.26267	12.3822	44.8274	9.03e-17	3.81e-16	3.02395	2.21399	0.101372	0.100986	0.10018	0.103293	0.871896	1.12636	1.24816	0.660391	1.92544	2.6683	0.106495	3.08262
392	0.21913	-0.251507	-0.37984	-0.0598914	0.359506	-0.119931	-1.1986	-2.18533	0.286346	-1.27854	-3.1533	-4.17577	-1.47846	-3.05064	-4.25863	-6.10722	13.9963	28.0739	1.15e-13	1.75e-13	2.98881	2.25199	0.336393	0.970139	0.698925	0.423027	0.101026	1.36595	1.48593	0.10017	0.933091	2.64036	0.106495	1.11673
393	-0.246373	-0.571789	-0.408545	-0.368522	-0.323003	-0.763758	-1.22422	-1.86912	-0.539258	-1.59441	-2.54422	-2.71231	-1.51099	-2.06267	-2.64421	-3.06945	16.2202	42.228	3.29e-16	1.07e-15	2.96334	2.22015	0.101372	0.769357	0.10018	0.103293	0.101026	1.27364	1.16084	0.10017	0.103274	2.62769	0.106495	0.101254
395	-0.286046	0.368829	-0.148577	-0.15511	-0.0887102	0.0600607	0.155819	-1.36948	-0.208541	-0.687217	-1.54357	-3.21104	-1.00932	-1.99628	-3.40366	-4.39635	13.3811	18.8076	2.36e-11	2.74e-11	3.00201	2.29007	1.26553	1.41242	0.408737	0.103293	0.81113	1.40936	1.16819	0.10017	0.103274	2.66195	0.500937	1.20237
396	-0.437591	-0.60239	-0.0449741	0.250011	-0.081638	-0.461154	-0.931607	-2.19963	-0.648799	-1.79936	-2.9981	-3.79692	-2.72781	-3.55396	-4.50648	-5.42576	15.9738	101.261	5.93e-22	1.01e-19	2.99344	2.23497	0.748711	1.51585	0.10018	0.103293	0.101026	1.31563	1.59668	0.347772	0.103274	2.65204	0.106495	0.146053
397	0.0902705	0.306855	0.162072	-0.529161	-0.25783	-0.218988	-0.179713	-0.435582	0.0358836	0.26678	0.176631	-0.120848	0.811727	1.18543	1.02665	0.363653	16.3294	7.51885	1.35e-06	1.39e-06	2.82915	2.07977	0.101372	0.67556	0.10018	0.103293	0.101026	0.101889	0.100977	0.10017	0.103274	2.57662	0.106495	0.374999
398	-0.096129	0.00478511	-0.441692	0.219075	0.228615	0.10345	-0.836949	-2.06674	-0.00816997	-1.14576	-2.6034	-3.92759	-1.71897	-2.61773	-3.48859	-4.6229	13.5635	29.608	5.6e-14	9e-14	3.00011	2.27782	0.775026	1.40563	0.10018	0.103293	1.01487	1.33735	1.57722	0.159327	0.584149	2.66179	0.106495	1.21899
400	-0.322422	-0.189261	0.102795	0.055198	-0.0974937	-0.269866	-0.640519	-2.00242	-0.48356	-1.3111	-2.65585	-3.9517	-2.07879	-3.12165	-4.50585	-6.03913	15.9676	62.6593	1.56e-18	1.77e-17	3.0046	2.27385	1.05423	1.0734	0.854713	0.103293	0.101026	1.38048	1.39513	0.10017	0.103274	2.65515	0.106495	0.562998
402	-0.669951	-0.584203	-0.0193987	0.150289	-0.299756	-0.466722	-0.806192	-2.33254	-0.935606	-1.79456	-3.08265	-4.07863	-3.01785	-3.71887	-4.73485	-6.26483	15.8858	77.0775	8e-20	2.28e-18	3.00634	2.29126	0.998126	1.34926	0.10018	0.103293	0.101026	1.37829	1.58586	0.10017	0.103274	2.66191	0.106495	0.101254
403	1.10132	3.09938	2.75402	0.238828	0.315402	2.73804	4.59052	6.47805	0.485347	4.52604	6.37149	7.30523	1.62869	3.52145	5.45387	6.96614	14.1053	78.218	6.47e-20	1.9e-18	3.14018	2.17251	1.61772	1.85193	0.93349	0.103293	0.101026	0.470207	1.41833	0.10017	0.547779	2.55648	0.106495	3.30694
406	0.160148	-0.224069	-0.356466	-0.153562	0.169222	-0.416412	-1.3071	-1.89101	0.0938015	-1.48246	-2.77451	-3.24517	-1.44468	-2.93844	-3.65986	-4.5473	15.3148	67.6718	2.3e-19	4.28e-18	2.98814	2.25815	0.101372	1.53874	0.873757	0.103293	0.101026	1.33044	1.23808	0.10017	0.103274	2.63616	0.106495	0.65239
407	-0.431622	-0.69471	-0.544306	0.0231699	-0.277377	-0.697319	-1.5977	-2.53634	-0.837877	-2.49458	-3.32945	-3.92659	-2.75212	-3.84033	-4.69467	-5.61599	13.389	53.1179	7.79e-18	5.95e-17	3.01885	2.30981	0.101372	1.92947	0.10018	0.103293	0.886154	1.16115	1.57427	0.10017	0.103274	2.6639	0.106495	0.101254
408	-0.0862127	-0.633681	-0.323342	-0.11019	0.272551	-0.418283	-1.18609	-1.44227	0.0537134	-1.73777	-2.8395	-3.45069	-2.23105	-3.6393	-4.59704	-5.17899	12.905	30.6791	2.24e-14	3.94e-14	2.95825	2.12271	0.101372	1.27619	0.10018	0.0969104	0.098995	1.30413	1.47915	0.10017	0.797818	2.6124	0.738023	0.101254
409	-0.0998769	-0.532657	0.249285	0.314271	-0.211082	-0.389994	-0.534604	-0.725825	-0.384474	-1.08135	-0.788341	-0.965161	-1.45801	-0.885716	-0.250218	-0.727224	15.4653	7.39097	1.62e-06	1.66e-06	2.91653	2.11853	0.101372	0.485136	0.577941	0.103293	0.101026	0.101889	1.28474	0.10017	0.103274	2.60158	0.106495	0.101254
410	-0.435035	-0.802473	-0.634202	-0.239941	-0.422802	-0.829841	-1.67487	-2.34772	-0.752726	-2.0822	-3.55943	-3.92707	-2.51256	-3.59183	-5.11036	-5.10172	15.4522	69.093	3.85e-19	5.89e-18	2.98532	2.27159	0.101372	0.100986	0.10018	0.103293	0.101026	1.37978	1.42326	0.10017	0.296768	2.64877	0.106495	0.489429
411	-0.819605	-0.231074	0.237085	0.0217391	-0.399962	-0.298537	-0.127193	-1.65725	-1.09066	-1.37299	-2.28407	-3.50453	-2.79394	-2.82774	-4.10359	-5.63782	14.8293	40.5293	7.35e-16	2e-15	2.99576	2.24683	1.34465	1.02113	0.10018	0.103293	0.101026	1.20802	1.47101	0.336611	0.103274	2.64279	0.515094	0.368335
412	-0.584628	-0.622375	-0.136975	0.126846	-0.30786	-0.550969	-1.01952	-2.28062	-0.906294	-1.883	-2.98445	-3.49466	-2.87737	-3.54737	-4.1073	-4.6489	16.2103	110.187	1.69e-22	5.22e-20	2.99829	2.27938	0.742699	1.63099	0.10018	0.103293	0.101026	1.21117	1.58135	0.10017	0.103274	2.65025	0.106495	0.101254
413	-0.5701	0.0354643	0.190877	0.213068	-0.158135	0.0188894	0.105625	-1.35717	-0.618285	-0.788771	-1.60207	-3.05819	-2.18065	-2.587	-3.51001	-4.76612	14.8168	26.3316	2.75e-13	3.98e-13	3.01663	2.29577	1.26247	1.5777	0.10018	0.103293	0.203006	1.33399	1.52394	0.10017	0.103274	2.66732	0.106495	1.20885
414	0.711755	2.83896	1.94331	-0.498632	0.11765	2.72469	3.9631	5.60446	0.738951	4.37497	5.19086	5.68748	0.780292	1.75101	3.64036	5.0467	14.7595	40.6743	6.99e-16	1.92e-15	3.13177	2.25818	1.50691	1.56815	0.974268	0.103293	0.101026	1.35579	1.51859	0.10017	0.103274	2.63197	0.106495	3.31468
415	-0.587042	-0.57338	-0.112378	0.0774611	-0.284402	-0.535398	-0.930523	-2.27054	-0.856372	-1.77308	-3.07908	-3.95458	-2.84676	-3.6302	-4.57255	-5.40025	16.4003	93.2757	5.09e-21	4e-19	2.99531	2.27303	0.864398	1.43947	0.10018	0.103293	0.101026	1.29981	1.54848	0.10017	0.119504	2.65391	0.106495	0.101254
416	-0.641897	-0.209145	0.272524	-0.0192888	-0.511559	-0.179927	-0.0530146	-1.54673	-0.992107	-1.13964	-2.32489	-3.19682	-2.47213	-2.62328	-4.00667	-4.97876	14.6822	42.9216	3.3e-16	1.07e-15	2.98325	2.22053	1.26107	0.100986	0.10018	0.103293	0.101026	1.06672	1.39907	0.1973	0.103274	2.63089	0.116572	0.888993
417	0.130363	0.162188	-0.160513	-0.450047	-0.177488	-0.367091	-0.721494	-1.00329	0.0384337	-0.503817	-0.952441	-1.22954	-0.165836	-0.358273	-0.398457	-1.04156	15.7593	6.36767	7.56e-06	7.74e-06	2.92363	2.20069	0.101372	1.48269	0.10018	0.103293	0.101026	0.855719	0.205115	0.10017	0.186634	2.62482	0.106495	0.165117
418	-0.133612	-0.640713	-0.481663	0.0531718	-0.0385542	-0.501008	-1.37804	-1.99559	-0.283057	-2.02275	-2.79657	-3.32117	-2.07949	-3.17504	-3.6042	-4.3168	14.2249	52.2832	9.8e-18	7.1e-17	2.98854	2.21954	0.101372	1.66622	0.10018	0.103293	0.905669	1.14531	1.4644	0.10017	0.103274	2.6367	0.106495	0.348438
419	1.08019	4.06409	4.17521	1.14184	0.757122	3.73647	5.77428	7.44774	0.929016	5.65604	7.42443	7.27935	2.36755	5.36604	6.70387	6.82829	13.3836	52.5325	1.91e-17	1.19e-16	3.14268	2.26055	1.88198	1.54115	0.968413	0.103293	0.101026	0.799041	1.29819	0.10017	0.98935	2.64111	0.106495	3.30038
420	-0.372441	-0.193199	0.0159236	0.390249	0.172967	0.0301249	-0.588695	-2.57864	-0.192251	-1.49786	-2.48893	-3.52636	-2.48893	-3.16645	-3.69846	-6.55502	13.0331	30.0868	4.5e-14	7.37e-14	3.00671	2.25957	1.12279	1.2257	0.10018	0.103293	0.892583	1.41448	1.60627	0.89977	0.103274	2.65619	0.357612	0.460351
421	1.51743	2.89881	2.168	-0.320209	0.744885	2.74641	3.88185	5.28761	1.24658	4.31096	5.17889	5.36854	2.19064	3.02835	4.30042	4.92763	14.6187	40.5994	7.17e-16	1.96e-15	3.12079	2.25954	1.61926	1.63419	1.12159	0.103293	0.101026	1.26056	1.42805	0.10017	0.791397	2.63712	0.106495	3.26566
422	1.2338	2.81244	0.990722	-1.22212	0.392056	2.81314	3.00299	4.47221	1.32654	3.97855	3.71746	5.31481	1.67088	2.00519	3.32045	4.99597	13.1384	28.4024	9.86e-14	1.52e-13	3.15092	2.25399	0.718789	2.18585	0.829461	0.103293	0.101026	1.31424	1.68801	0.497316	0.733684	2.62927	0.106495	3.29971
423	-0.827584	-0.0262376	0.631291	0.428063	-0.063926	-0.0859527	0.369944	-1.26747	-1.26598	-1.10904	-1.60449	-3.00308	-3.26117	-3.03034	-3.41462	-4.26756	12.8574	23.2687	1.44e-12	1.87e-12	3.01292	2.2594	1.37411	1.64984	0.670138	0.103293	0.101026	0.39989	1.5445	0.10017	0.103274	2.65813	0.531225	0.789042
424	-0.488051	-0.844045	-0.292848	0.0739743	-0.342281	-0.703276	-1.31591	-1.79813	-0.791263	-1.89761	-2.52712	-2.51548	-2.66467	-2.87292	-2.54161	-2.6578	16.4266	74.0473	6.07e-20	1.85e-18	2.97664	2.23864	0.101372	1.18779	0.10018	0.103293	0.101026	0.94192	1.50912	0.10017	0.103274	2.63443	0.106495	0.101254
425	-0.670878	-0.65744	-0.103209	-0.0672496	-0.458802	-0.606438	-0.818884	-2.22476	-0.980001	-1.77885	-2.99868	-4.00166	-2.74432	-3.32218	-4.67954	-5.44774	16.3333	89.6909	8.98e-21	5.77e-19	2.9821	2.23761	0.975474	0.437458	0.10018	0.103293	0.101026	1.29944	1.48689	0.10017	0.103274	2.63742	0.106495	0.101254
426	0.763021	2.40826	1.82136	-0.753673	-0.0795835	2.43628	3.75096	4.81368	1.06427	4.05217	5.05464	5.04012	1.98128	3.30623	4.33981	4.41927	14.8818	45.4694	1.47e-16	5.75e-16	3.1091	2.20032	1.59544	1.79148	0.10018	0.103293	0.101026	1.20371	1.41387	0.10017	0.784437	2.62043	0.106495	3.22607
427	0.320879	0.0813282	-0.707472	0.250811	0.788776	0.10445	-1.56756	-1.75905	0.879958	-1.67024	-2.85878	-3.2674	-1.65638	-2.74316	-3.85426	-6.96924	12.2942	22.5654	2.17e-12	2.74e-12	2.99404	2.26453	0.101372	0.690769	1.00543	0.103293	0.801467	1.40016	1.5425	0.0998303	1.00007	2.648	0.318326	1.01361
428	-0.36394	-0.00515533	0.369998	0.29092	0.0882279	0.0524944	-0.178616	-1.76331	-0.490828	-1.0348	-2.07921	-3.52977	-2.55506	-3.41308	-4.27326	-6.01951	15.251	44.2452	2.15e-16	7.63e-16	3.00907	2.27527	1.28468	1.27627	0.729111	0.103293	0.101026	1.32386	1.59942	0.10017	0.503823	2.66168	0.106495	1.05244
429	-0.371699	-0.0410695	0.444397	0.429564	0.168369	-0.0902926	-0.205945	-1.93043	-0.559409	-1.29806	-2.26413	-3.78341	-2.55487	-3.00408	-3.49448	-5.63873	13.135	31.2044	2.49e-14	4.33e-14	3.01815	2.30237	1.21952	1.84644	0.10018	0.477548	0.101026	1.24943	1.56796	0.49482	0.644967	2.6714	0.106495	0.101254
430	-0.466029	-0.388308	-1.08864	-0.251187	0.0478898	-0.356728	-1.50619	-2.13974	-0.261585	-1.75317	-3.64492	-4.85235	-2.69526	-4.64756	-5.29476	-6.76128	12.8396	29.079	7.16e-14	1.13e-13	2.99815	2.30517	0.108344	1.0537	0.0998203	0.0969104	0.86795	1.47215	1.53973	0.0998303	0.679406	2.65966	0.891265	0.852559
431	1.2158	3.74817	3.50918	0.992103	0.262581	3.61675	5.01025	6.94909	1.56207	5.30657	6.94477	7.07994	1.69864	4.18029	6.19649	6.51788	12.9662	47.5615	7.79e-17	3.39e-16	3.13543	2.23281	1.77562	1.85559	1.16638	0.884366	0.101026	1.33177	1.45111	0.457233	0.855873	2.61247	0.735776	3.35808
432	-0.976237	0.113422	0.176504	0.13445	0.0763082	0.0229101	0.0488979	-1.14127	-0.619505	-0.799812	-1.6529	-3.50621	-2.40455	-2.87399	-3.7556	-5.54507	12.8114	19.8511	1.17e-11	1.38e-11	3.03257	2.34345	1.35626	1.88018	0.10018	0.103293	0.101026	1.4081	1.46947	0.10017	0.103274	2.68857	0.790945	0.948367
433	0.582255	1.03378	0.254282	0.184277	0.343351	0.954437	1.19766	1.61703	0.565417	1.49158	0.989903	1.07834	0.161724	0.482051	0.45643	0.721265	13.5606	5.20284	4.74e-05	4.83e-05	2.99031	2.15174	0.101372	1.46743	0.10018	0.103293	0.101026	0.710357	1.12956	0.10017	0.103274	2.60501	0.106495	2.1701
434	-0.00536922	0.129241	0.154993	-0.554122	-0.371033	-0.392306	-0.314184	-0.453023	-0.12521	0.18391	0.255287	-0.0964231	0.703058	1.21196	1.15984	0.445737	16.056	7.8443	8.55e-07	8.81e-07	2.81404	2.06849	0.101372	0.111738	0.10018	0.103293	0.101026	0.101889	0.100977	0.10017	0.103274	2.56411	0.106495	0.101254
435	-0.692014	-0.488115	0.365861	0.133363	-0.42348	-0.354979	-0.364838	-2.14922	-1.19741	-1.4581	-2.57925	-3.53892	-3.06685	-3.11396	-4.04792	-4.81763	14.1835	50.8912	1.45e-17	9.59e-17	2.9913	2.21661	1.23716	1.58549	0.10018	0.103293	0.101026	0.91837	1.61523	0.10017	0.451165	2.63608	0.106495	0.101254
436	3.02683	2.62322	1.88816	-2.08484	2.12134	2.98967	3.97904	3.51971	3.21665	4.71864	4.74424	2.82035	4.93651	5.63742	4.41662	2.33114	14.0409	31.0748	2.89e-14	4.95e-14	3.05532	2.2296	1.50343	0.542499	0.780549	0.103293	0.101026	1.37765	0.446352	0.10017	1.80467	2.67059	0.321949	3.11836
438	-0.26815	-0.355195	0.218941	0.204269	-0.285117	-0.41314	-0.622123	-0.714709	-0.508346	-0.735419	-0.757159	-0.83679	-0.830729	-0.357672	-0.0153628	-0.497056	15.6126	3.33997	0.00216833	0.00217852	2.9081	2.15349	0.101372	1.59982	0.10018	0.103293	0.101026	0.101889	1.11627	0.10017	0.103274	2.60476	0.106495	0.101254
439	0.197236	2.17476	2.39025	-0.6949	-0.365483	2.30751	4.06273	5.3018	0.531149	4.48531	5.84297	4.95204	1.91827	4.58645	4.93943	4.21074	13.6429	48.4828	5.94e-17	2.81e-16	3.10931	2.26949	1.8208	1.62181	0.918729	0.103293	0.101026	1.31627	0.145881	0.10017	0.901421	2.66448	0.106495	3.21038
440	-0.726743	-0.165164	0.440142	0.121147	-0.391293	-0.22593	-0.00918123	-1.54498	-1.03614	-1.16302	-1.99769	-3.14034	-2.68704	-3.07081	-4.07578	-4.96776	15.6385	40.9376	6.39e-16	1.8e-15	2.99939	2.25782	1.34709	1.15654	0.417373	0.103293	0.101026	1.0491	1.50635	0.10017	0.103274	2.64501	0.106495	0.919721
441	-0.84454	-0.297265	0.478272	0.160928	-0.494998	-0.302694	-0.15949	-1.81529	-1.14331	-1.48965	-2.17292	-3.76463	-3.14058	-3.33547	-4.12898	-5.9077	15.4608	41.4037	5.45e-16	1.58e-15	3.0079	2.27816	1.40118	1.01254	0.556503	0.103293	0.101026	1.29728	1.5679	0.10017	0.103274	2.65742	0.106495	0.158582
442	-0.136363	0.056369	-0.54075	-1.24512	-0.401278	-0.645637	-1.02471	-1.56015	-0.231695	-0.869131	-1.85575	-1.97976	-0.464571	-0.954841	-1.1315	-2.03594	13.559	8.74183	2.18e-07	2.28e-07	2.94028	2.27226	0.101372	1.45763	0.309084	0.103293	0.101026	1.17042	0.100977	0.10017	0.103274	2.61914	0.106495	0.101254
443	-0.198729	-0.44061	-0.172598	0.355298	0.30044	-0.222801	-1.25096	-2.35287	-0.101062	-1.88089	-2.9531	-4.43214	-2.81461	-4.18045	-5.24732	-6.55334	14.5324	58.788	3.87e-18	3.44e-17	3.00679	2.28593	0.751382	1.40287	1.1453	0.103293	0.413027	1.38178	1.67813	0.10017	0.113993	2.66035	0.106495	0.466282
444	-0.271464	-0.671198	-0.492556	-0.083919	-0.261404	-0.578557	-1.21962	-1.92357	-0.527035	-1.63217	-2.88518	-3.38993	-2.19915	-2.93898	-3.58667	-3.56199	15.8714	57.078	3.68e-18	3.38e-17	2.97582	2.23611	0.101372	0.100986	0.10018	0.103293	0.101026	1.19875	1.45807	0.10017	0.103274	2.63558	0.106495	1.03351
445	-0.684878	-0.339165	0.27105	0.0446353	-0.421682	-0.154088	0.039628	-1.46051	-0.976811	-0.962595	-2.10812	-3.36828	-2.93593	-2.70577	-3.37548	-4.87262	13.9832	27.732	1.36e-13	2.06e-13	2.99218	2.21225	1.29058	0.100986	0.10018	0.103293	0.101026	0.964276	1.58733	0.10017	0.42933	2.6422	0.106495	1.20201
447	-0.695992	-0.287103	-0.262152	-0.0688341	-0.245391	-0.337075	-0.768939	-2.25114	-0.791143	-1.42315	-2.77318	-4.19049	-2.67537	-3.4466	-4.93557	-6.77903	14.141	38.4473	1.53e-15	3.84e-15	3.01542	2.30115	1.17326	1.53859	0.10018	0.103293	0.487242	1.38445	1.56342	0.10017	0.844077	2.67365	0.283269	0.101254
448	-0.490601	0.151498	0.353218	0.0878286	-0.290146	-0.222635	0.0386519	-1.53155	-0.633448	-0.882724	-1.90179	-3.0586	-1.61556	-2.31317	-3.62884	-5.02935	14.078	24.1474	8.79e-13	1.17e-12	3.02169	2.29974	1.22946	1.86192	0.10018	0.103293	0.101026	1.33029	1.20916	0.216691	0.103274	2.67402	0.106495	0.154788
449	-0.580233	-0.8723	-0.192324	0.0144339	-0.493287	-0.747574	-1.00227	-1.77063	-0.977997	-1.84918	-2.41176	-2.58818	-2.72837	-2.6031	-2.60731	-2.58549	16.3787	62.6837	6.99e-19	9.2e-18	2.96875	2.2165	0.181548	0.100986	0.10018	0.103293	0.101026	0.899554	1.50041	0.10017	0.103274	2.62794	0.106495	0.128029
450	-0.429957	0.0709283	0.156019	-0.177914	-0.47953	-0.292289	-0.127285	-1.75933	-0.669962	-1.04977	-2.15118	-3.13417	-1.45848	-2.1877	-3.47921	-4.5565	14.5609	34.7315	6.27e-15	1.32e-14	3.00566	2.2784	1.1581	1.71755	0.10018	0.103293	0.236526	1.28715	1.08295	0.10017	0.103274	2.65016	0.106495	0.101254
451	-0.383945	0.249427	0.0958741	-0.60154	-0.636725	-0.240982	-0.0143882	-1.20814	-0.525999	-0.718122	-1.85714	-2.6842	-0.829947	-1.61975	-3.21994	-4.2925	14.3516	22.7035	2e-12	2.54e-12	2.99366	2.25963	1.16056	0.946223	0.10018	0.103293	0.101026	1.33848	0.356689	0.10017	0.103274	2.64547	0.106495	0.737906
452	-0.657627	-0.4259	0.204177	0.0854177	-0.434198	-0.256195	-0.385917	-1.94962	-0.944577	-1.32579	-2.54082	-3.53519	-2.75702	-3.20711	-4.20526	-4.552	14.9096	36.2263	3.5e-15	8.08e-15	2.98411	2.22196	1.15216	0.97924	0.10018	0.103293	0.101026	0.853694	1.57502	0.10017	0.278536	2.63155	0.106495	1.0695
453	-0.826872	-0.510107	-0.0784451	0.149342	-0.412817	-0.498773	-0.656133	-1.73241	-1.1395	-1.52388	-2.75365	-3.19929	-3.16042	-3.26781	-3.49292	-3.52969	14.4626	44.5429	9.9e-17	4.11e-16	2.99403	2.25539	0.892653	1.08302	0.10018	0.103293	0.101026	0.378145	1.5694	0.10017	0.103274	2.64637	0.316475	0.930421
454	-0.0693004	-0.222277	-0.185554	0.0124792	-0.217339	-0.325619	-0.758597	-0.989419	-0.373148	-0.796926	-1.7429	-1.57871	-0.985887	-1.14111	-1.24263	-1.16675	14.0916	8.45057	3.05e-07	3.19e-07	2.95426	2.20841	0.101372	0.100986	0.10018	0.103293	0.101026	0.136259	1.19396	0.10017	0.103274	2.63427	0.106495	1.10368
455	-0.119383	-0.105119	-0.326268	0.367303	0.378404	0.0927388	-0.553207	-1.49675	0.102175	-1.11561	-2.60192	-2.71212	-1.97778	-3.14367	-4.06526	-4.14977	12.6663	26.3763	1.6e-13	2.38e-13	2.97448	2.17753	0.327213	1.2723	0.10018	0.0969104	0.623157	0.849091	1.56118	0.0998303	0.499141	2.63333	0.824293	1.20234
456	-0.436282	-0.766136	-0.269685	0.238433	-0.216551	-0.650208	-1.28132	-1.819	-0.711775	-1.96283	-2.56505	-2.59139	-2.6332	-3.09851	-2.92903	-3.09954	15.8447	73.0478	7.42e-20	2.15e-18	2.98669	2.24228	0.101372	1.64743	0.10018	0.103293	0.101026	1.08848	1.56359	0.10017	0.103274	2.64778	0.106495	0.101254
457	0.10714	0.25174	-0.0331004	-0.701702	-0.0132552	-0.218209	-0.237083	-1.229	0.142476	-0.782767	-1.81584	-2.56418	-0.23148	-1.80192	-2.82119	-3.39825	12.9849	18.2734	2.28e-11	2.65e-11	2.98006	2.22395	0.723512	1.52029	0.186339	0.103293	0.101026	1.26706	0.11879	0.769243	0.103274	2.64236	0.321024	0.101254
458	-0.78652	-0.226982	-0.102465	0.150338	-0.0817408	-0.0420936	-0.405258	-1.95712	-0.700176	-1.20813	-2.50355	-3.86323	-3.00138	-3.52511	-4.84913	-6.56823	14.0614	34.9409	5.77e-15	1.21e-14	3.01713	2.31751	1.24358	1.65914	0.10018	0.103293	0.101026	1.40993	1.63801	0.10017	0.581823	2.68154	0.659163	0.918667
460	-0.75593	-0.477505	0.489296	0.27346	-0.31417	-0.323823	-0.364316	-2.09507	-1.13725	-1.43693	-2.44549	-3.42507	-3.33052	-3.6755	-4.09161	-5.55641	13.964	58.2797	2.02e-18	2.08e-17	3.00541	2.27619	1.2293	1.38636	0.214674	0.537326	0.101026	0.913517	1.63621	0.276528	0.103274	2.65738	0.106495	0.101254
462	-0.284221	-0.632956	-0.449271	-0.290071	-0.242605	-0.752594	-1.33673	-1.84147	-0.470745	-1.82149	-2.85726	-2.82757	-1.8014	-2.9093	-3.06391	-3.15703	14.999	41.0838	3.35e-16	1.09e-15	2.96408	2.20272	0.101372	0.666717	0.10018	0.103293	0.101026	1.20339	1.25875	0.10017	0.802206	2.62395	0.106495	0.101254
463	-1.08558	-0.348231	0.484161	-0.0240307	-0.719801	-0.414433	-0.00724894	-1.58019	-1.80629	-1.35374	-2.007	-2.82669	-3.44045	-2.95761	-3.80303	-3.98194	13.2313	28.9411	5.46e-14	8.8e-14	2.99992	2.23516	1.40847	1.43243	0.10018	0.103293	0.101026	0.432282	1.53747	0.10017	0.103274	2.64336	0.304614	0.386458
464	-0.510316	-0.566987	-0.041147	0.035479	-0.402628	-0.417569	-0.703762	-1.97677	-0.803427	-1.5383	-2.86965	-3.60294	-2.5787	-3.11308	-4.13832	-4.31048	15.5897	59.7571	3.06e-18	2.9e-17	2.97217	2.21896	0.903154	0.100986	0.10018	0.103293	0.101026	1.07253	1.49351	0.10017	0.500367	2.63008	0.106495	0.882454
465	0.712794	1.78075	1.76595	-0.550186	-0.323699	2.39794	3.73513	4.40961	0.619521	3.44796	4.29949	4.03618	1.51858	2.82643	2.96317	3.09401	12.9811	26.3497	2.72e-13	3.94e-13	3.07602	2.22212	1.64507	0.129124	0.10018	0.103293	0.101026	0.415606	1.32038	0.10017	0.759731	2.62929	0.106495	3.01256
466	-0.346213	-0.265628	0.187154	0.0805454	-0.120439	-0.305346	-0.564279	-2.05553	-0.535432	-1.42592	-2.55013	-3.81157	-2.33945	-3.20146	-4.38558	-6.00235	15.5035	65.4624	8.34e-19	1.06e-17	2.99999	2.27383	1.08457	1.41531	0.88976	0.103293	0.101026	1.3389	1.45438	0.10017	0.103274	2.65058	0.106495	0.101254
467	-0.713309	-0.217594	0.0492409	0.222869	-0.134745	-0.0826531	-0.234602	-1.72651	-0.736907	-1.11867	-2.2332	-3.53948	-2.76728	-3.1316	-4.79718	-5.68024	15.113	48.3256	6.22e-17	2.91e-16	3.00677	2.26334	1.1855	1.38758	0.10018	0.103293	0.101026	1.2976	1.59062	0.10017	0.103274	2.6627	0.364938	1.10425
468	-0.355565	-0.769545	-0.326348	0.0555626	0.000699316	-0.68302	-1.48882	-2.20782	-0.589798	-1.98071	-3.31216	-4.17713	-2.91733	-3.79936	-5.03871	-5.86901	14.5113	65.8175	4.07e-19	6.01e-18	2.99203	2.26078	0.101372	0.937656	0.10018	0.103293	0.101026	1.35067	1.56385	0.802611	0.103274	2.64887	0.106495	0.101254
469	-0.44608	0.083534	0.461641	0.255584	0.0162398	-0.0674669	0.0809248	-1.4888	-0.563263	-0.868182	-1.85951	-3.07595	-2.09252	-2.63999	-3.75554	-4.99951	15.2936	39.9111	9.11e-16	2.44e-15	2.99641	2.24568	1.2635	1.44148	0.10018	0.103293	0.101026	1.26617	1.43705	0.289402	0.103274	2.64379	0.106495	1.02671
470	-0.337962	-0.873706	-0.52447	-0.0314981	-0.171553	-0.643625	-1.43162	-2.24616	-0.535208	-2.07246	-3.15179	-3.61991	-2.84647	-3.53868	-4.43001	-4.59514	16.1436	100.994	6.17e-22	1.03e-19	2.97608	2.22201	0.101372	0.100986	0.429482	0.103293	0.101026	1.25413	1.54417	0.10017	0.103274	2.63588	0.106495	0.546388
471	-0.620716	-0.477362	-0.00985781	0.136797	-0.305272	-0.436592	-0.713214	-2.16186	-0.886978	-1.59839	-2.80146	-3.79641	-2.74321	-3.43495	-4.47846	-5.66647	16.7657	79.7756	4.87e-20	1.59e-18	3.00296	2.27917	0.991081	1.37389	0.10018	0.103293	0.101026	1.29582	1.54283	0.10017	0.103274	2.6563	0.106495	0.525611
472	-0.405582	-0.6926	-0.504036	0.143898	0.0592004	-0.456806	-1.3387	-2.28009	-0.482185	-1.85537	-3.16665	-4.429	-3.11927	-4.54398	-5.51163	-6.00327	13.6698	57.427	2.51e-18	2.47e-17	3.01062	2.27485	0.290684	1.70494	0.10018	0.182979	0.101026	1.34957	1.64814	0.569038	0.103274	2.6709	0.588401	0.101254
473	-0.444263	-0.754386	-0.411967	0.259711	-0.159434	-0.461731	-1.36756	-2.26076	-0.646735	-1.98822	-3.11578	-3.75361	-2.97157	-3.84486	-4.51719	-5.00032	15.7976	80.883	3.74e-20	1.26e-18	3.00368	2.27245	0.121994	1.53225	0.10018	0.103293	0.241169	1.2088	1.65055	0.10017	0.103274	2.65697	0.106495	0.909337
474	-0.280805	-0.126483	-0.000607346	0.318022	0.141951	0.0245148	-0.476548	-1.91141	-0.278805	-1.11829	-2.31691	-3.83312	-2.19523	-3.34608	-4.41447	-5.41501	14.8626	47.9889	6.87e-17	3.11e-16	3.00244	2.25952	1.05181	1.45408	0.10018	0.103293	0.101026	1.27007	1.6332	0.145196	0.771445	2.66003	0.106495	1.16005
475	-0.31092	-0.575092	-0.342002	0.0575158	-0.224128	-0.616825	-1.16339	-1.80451	-0.594569	-1.71331	-2.57628	-2.72277	-2.1701	-2.6989	-2.78828	-3.26943	16.752	95.8406	1.34e-21	1.76e-19	2.98327	2.25816	0.101372	1.39244	0.10018	0.103293	0.101026	1.14798	1.41961	0.10017	0.103274	2.6467	0.106495	0.3317
476	-0.888797	-0.519614	0.171186	0.0435991	-0.631057	-0.56497	-0.545729	-2.21692	-1.32411	-1.71129	-2.78852	-3.95691	-3.21517	-3.26864	-4.80401	-5.70741	16.0563	67.8683	4.97e-19	7.17e-18	3.00139	2.28031	1.23189	0.962698	0.10018	0.103293	0.101026	1.15766	1.55277	0.10017	0.103274	2.65115	0.106495	0.101254
477	-0.0526639	-0.398807	-0.500271	-0.576264	-0.243155	-0.718724	-1.18352	-1.80368	-0.254754	-1.36346	-2.07093	-2.52783	-1.06261	-1.79958	-2.27085	-3.02734	14.662	25.644	2.36e-13	3.42e-13	2.95479	2.21304	0.101372	0.100986	0.615166	0.103293	0.101026	1.25539	0.879322	0.10017	0.103274	2.62445	0.106495	0.101254
478	-0.184336	-0.0598725	0.0360712	-0.3577	-0.450788	-0.39682	-0.211576	-1.34041	-0.517075	-0.833423	-1.79515	-2.43656	-0.952393	-1.45521	-2.25206	-2.58876	15.4174	24.0857	8.76e-13	1.17e-12	2.96162	2.20059	0.938803	0.100986	0.10018	0.103293	0.101026	1.15216	0.857685	0.10017	0.103274	2.61657	0.106495	0.917497
479	-0.409398	-0.921199	-0.86817	-0.0561593	-0.205002	-0.775227	-1.84394	-2.41819	-0.631249	-2.24904	-3.58728	-4.19077	-2.48882	-3.76967	-5.15482	-5.94292	14.1223	65.3885	3.77e-19	5.81e-18	2.98266	2.26523	0.101372	0.100986	0.469623	0.103293	0.876774	1.25212	1.55002	0.10017	0.565274	2.63899	0.106495	0.468902
480	-0.137206	-0.635088	-0.401706	0.0305029	-0.0352004	-0.499588	-1.29441	-1.91708	-0.350132	-1.61206	-2.85743	-3.43259	-2.24218	-3.08158	-3.77184	-3.79975	16.0764	77.1157	3.34e-20	1.21e-18	2.97014	2.22284	0.101372	0.836919	0.10018	0.103293	0.101026	1.23403	1.45596	0.359398	0.103274	2.62461	0.106495	0.967939
481	0.311469	0.507797	0.0272018	-0.536453	0.0503523	-0.0445804	-0.174243	-0.247659	0.415416	0.56033	0.323803	0.0680046	1.13261	1.41013	1.17171	0.597761	15.1679	7.80347	9.05e-07	9.32e-07	2.80968	2.08152	0.101372	0.875636	0.10018	0.103293	0.101026	0.101889	0.100977	0.10017	0.103274	2.5741	0.106495	0.944199
482	-0.287467	-0.680257	-0.414538	0.195703	-0.00579131	-0.418889	-1.23566	-1.96378	-0.494806	-1.71636	-2.99552	-3.63827	-2.76277	-3.74777	-4.01348	-4.31121	15.9349	76.6467	6.68e-20	1.96e-18	2.98924	2.2495	0.101372	1.27538	0.10018	0.103293	0.101026	1.17788	1.60635	0.10017	0.103274	2.64574	0.106495	1.04933
483	-0.332203	-0.581288	-0.211066	0.116195	0.00324919	-0.241389	-1.04377	-2.36485	-0.356818	-1.60009	-2.87028	-3.88122	-2.70372	-3.32457	-4.86283	-5.32122	14.9598	63.8557	1.19e-18	1.42e-17	2.98866	2.26085	0.603744	0.100986	0.928033	0.103293	0.101026	1.24892	1.61298	0.10017	0.103274	2.63972	0.106495	1.0802
484	-0.184038	-0.356595	-0.0916244	0.0290489	-0.164672	-0.291422	-0.616286	-1.30526	-0.366336	-1.00096	-1.73429	-2.111	-1.41129	-1.57544	-1.77998	-1.77676	15.5922	22.8577	1.14e-12	1.49e-12	2.95084	2.17901	0.101372	0.373036	0.10018	0.103293	0.101026	0.66384	1.34089	0.10017	0.103274	2.60959	0.106495	1.13808
485	-0.207122	-0.936497	-0.494095	0.0881465	-0.110773	-0.545711	-1.38532	-1.98155	-0.399058	-1.90467	-3.59464	-3.75777	-2.38531	-3.63544	-4.43187	-4.31793	13.7502	41.637	2.81e-16	9.33e-16	2.97461	2.19526	0.101372	0.100986	0.10018	0.103293	0.101026	1.14944	1.60531	0.10017	0.979732	2.62581	0.106495	0.786271
486	-0.126786	0.705437	0.685708	0.319722	0.252716	0.548945	0.587921	-0.657673	0.0587804	-0.143016	-0.747883	-1.92735	-2.01176	-2.39272	-2.77301	-3.91413	12.6204	16.3291	1.45e-10	1.64e-10	3.02702	2.3139	1.3878	1.88577	0.874324	0.597706	0.101026	1.29188	1.37671	0.10017	0.103274	2.6721	0.256027	1.16106
487	-0.329635	-0.562831	-0.601614	0.216668	0.00214424	-0.405084	-1.57757	-2.41764	-0.486975	-2.2647	-3.52567	-3.87177	-2.94117	-4.11858	-5.11626	-7.06403	13.866	51.9928	1.85e-17	1.15e-16	3.02774	2.34447	0.101372	2.00577	0.173244	0.103293	0.168136	1.3866	1.61367	0.10017	0.103274	2.68182	0.400249	0.464351
488	-0.384532	-0.729462	-0.604677	-0.114362	-0.311373	-0.598031	-1.36261	-1.99078	-0.627374	-1.81527	-3.12967	-3.44477	-2.69568	-3.62221	-4.39091	-4.61483	15.4713	61.7387	1.92e-18	2.06e-17	2.98134	2.25485	0.101372	0.100986	0.10018	0.103293	0.101026	1.21212	1.48052	0.10017	0.103274	2.64397	0.252678	0.938316
489	-0.552091	-0.793878	-0.347715	0.0639689	-0.274332	-0.652011	-1.35078	-2.55486	-0.766089	-2.1728	-3.22985	-4.32604	-3.08883	-3.91817	-5.11732	-6.56163	15.9105	97.477	2.13e-21	2.24e-19	2.99768	2.27966	0.595527	0.302601	0.7422	0.103293	0.101026	1.35413	1.605	0.10017	0.103274	2.65321	0.106495	0.101254
490	-0.692881	-0.380383	0.0275302	0.0326658	-0.53656	-0.271818	-0.508258	-1.90917	-0.921212	-1.42484	-2.70905	-4.17688	-2.67529	-3.10494	-3.9537	-6.06106	14.4003	36.2243	3.5e-15	8.08e-15	2.99497	2.26595	1.19363	0.100986	0.10018	0.103293	0.439875	1.16232	1.5192	0.10017	0.739624	2.65348	0.106495	0.945031
491	-0.48575	-0.857623	-0.290336	-0.0132821	-0.426214	-0.793412	-1.13597	-1.64992	-0.856005	-1.78874	-2.23621	-2.2732	-2.36529	-2.25883	-2.09712	-2.20016	16.2393	40.2817	4.18e-16	1.27e-15	2.95282	2.20334	0.101372	0.100986	0.10018	0.103293	0.101026	0.873255	1.44761	0.10017	0.103274	2.61937	0.106495	0.101254
492	-0.1207	0.00192995	0.448207	0.0765984	-0.282919	-0.343117	-0.159325	-0.422845	-0.321101	-0.094924	0.147357	-0.289902	-0.0574279	0.686508	0.845057	-0.222925	15.0966	3.53021	0.0014333	0.00144066	2.86072	2.09876	0.101372	0.100986	0.505438	0.103293	0.101026	0.101889	0.504138	0.10017	0.103274	2.60097	0.106495	0.101254
493	-0.719603	-0.277847	0.484552	0.227503	-0.340938	-0.23419	-0.184208	-1.89577	-0.98475	-1.33943	-2.27871	-3.53796	-2.94086	-3.14553	-3.98458	-5.4239	15.2649	50.5466	3.3e-17	1.76e-16	3.0093	2.27816	1.31833	1.52765	0.644743	0.103293	0.101026	1.15765	1.57191	0.10017	0.103274	2.66073	0.106495	0.101254
494	-0.360149	0.613492	0.650624	0.284081	0.141072	0.117	0.516922	-0.640138	-0.0807996	-0.402937	-1.08732	-2.332	-1.14782	-1.83867	-2.50938	-4.68321	13.5207	19.2855	1.71e-11	2e-11	3.01138	2.28357	1.40013	1.38598	0.369511	0.153402	0.101026	1.36225	1.16909	0.701716	0.103274	2.65932	0.106495	1.03519
495	1.56372	2.837	0.732412	-1.33084	0.408765	2.94805	2.90238	4.18067	1.69251	3.95854	3.2009	4.1951	1.0959	2.12477	2.28098	3.72273	12.5448	16.9275	9.18e-11	1.04e-10	3.08205	2.23363	0.101372	1.47389	0.675899	0.103293	0.101026	1.3183	1.50299	0.854429	0.103274	2.60565	0.106495	3.19554
496	0.328521	0.653957	0.489302	-0.1054	0.0315841	0.108211	0.216182	0.140767	0.421278	0.680474	0.804219	0.508838	1.15634	1.62751	1.73767	1.14051	15.9186	10.7219	2.51e-08	2.67e-08	2.8133	2.05342	0.101372	1.29702	0.10018	0.103293	0.101026	0.101889	0.100977	0.10017	0.103274	2.56757	0.106495	0.291299
498	1.2102	2.81496	0.649209	-1.17547	0.353639	3.18223	2.96657	4.91674	1.20035	4.19297	4.50027	6.40222	1.64955	2.73982	4.3019	6.41207	12.5338	27.3755	1.62e-13	2.41e-13	3.15291	2.18606	0.101372	2.16229	0.397302	0.103293	0.605717	0.987274	1.48763	0.10017	0.103274	2.51286	0.106495	3.3015
499	2.41349	2.02313	2.13305	-4.08211	1.27849	2.79684	3.49012	3.91677	3.00667	4.36519	5.4405	5.04126	5.31973	5.95312	7.05567	5.64977	12.3374	34.8159	1.41e-14	2.64e-14	3.10063	2.11838	1.40462	1.91706	1.10213	0.103293	0.101026	1.40912	0.16947	0.475278	1.67615	2.56019	0.106495	3.2744
500	-0.205546	-0.311314	0.123538	0.00520083	-0.291899	-0.448164	-0.545302	-0.776424	-0.444834	-0.627458	-0.577903	-0.745846	-0.465238	0.0447503	0.180634	-0.339631	16.7042	3.08888	0.00379387	0.0038083	2.87827	2.11923	0.101372	1.08024	0.10018	0.103293	0.101026	0.101889	0.868512	0.10017	0.103274	2.58876	0.106495	0.101254
501	1.99623	3.50658	2.16359	-1.26529	1.06557	3.57844	4.1848	5.75044	1.94245	4.82744	5.62073	6.46668	2.59764	3.93496	4.84736	6.18927	12.5207	26.788	2.18e-13	3.16e-13	3.13055	2.18733	0.101372	2.03114	0.22154	0.103293	0.101026	1.23306	0.236213	0.10017	0.103274	2.57393	0.106495	3.16983
503	2.06132	3.15788	3.39831	-0.0198372	1.40258	2.8708	4.29625	6.83561	1.40258	4.64725	7.6846	8.72912	3.02953	3.94859	7.71488	8.557	12.3163	61.5159	2.03e-18	2.08e-17	3.18007	2.20203	1.5005	2.66516	1.0886	0.103293	0.101026	1.26983	1.03211	0.10017	0.979283	2.57879	0.664262	3.35788
504	-0.465182	-0.74795	0.0187647	0.170772	-0.477074	-0.658065	-0.720863	-0.913351	-0.753397	-1.27654	-1.06349	-1.06018	-1.34293	-0.809093	-0.39911	-0.668399	15.4167	4.88421	9.58e-05	9.74e-05	2.89497	2.10935	0.101372	0.100986	0.10018	0.103293	0.101026	0.101889	1.30759	0.10017	0.103274	2.57812	0.106495	0.101254
507	1.88888	3.15959	2.43448	-1.56456	0.787088	2.92832	4.1249	5.72122	1.57754	4.88299	5.91035	6.28634	3.45908	4.37145	5.74357	6.21955	14.5917	50.749	3.12e-17	1.7e-16	3.14388	2.21678	1.60313	1.74522	1.08875	0.103293	0.101026	1.35956	1.41215	0.10017	1.0413	2.61795	0.106495	3.3488
508	1.72931	2.66096	1.60445	-0.849068	-0.447642	2.29602	3.87634	5.29424	0.438845	4.3732	4.97546	5.49172	2.97225	4.10513	4.92638	5.1827	12.9896	35.9143	3.95e-15	8.9e-15	3.12874	2.25015	1.63948	0.100986	1.00405	0.103293	0.101026	1.01791	1.52534	0.10017	1.15358	2.61265	0.492265	3.32387
509	0.842512	2.32077	4.33791	-2.32989	0.842512	2.68895	4.54247	6.92565	-2.13e-13	4.46296	7.98913	8.75743	0.829504	3.99056	7.41027	8.95677	12.4044	73.6016	5.09e-19	7.21e-18	3.16782	2.10468	1.43952	2.56821	0.133914	0.103293	0.101026	1.18149	0.742298	0.10017	0.103274	2.4797	0.106495	3.27453
511	1.70704	2.37434	1.76604	-1.4505	0.338996	2.56005	3.77117	3.95766	1.38484	4.2538	4.45874	3.23478	3.78767	4.72619	4.74265	3.00228	13.5797	30.3793	3.94e-14	6.57e-14	3.08907	2.26079	1.6609	0.705311	0.114093	0.103293	0.898237	1.4022	1.39056	0.10017	1.47936	2.68463	0.106495	3.23367
512	2.14064	2.72977	1.79081	-1.68087	1.46341	2.88492	3.60534	3.81533	2.64705	4.61772	4.57039	3.6477	4.63947	4.82579	4.87052	3.93713	13.7202	33.848	8.94e-15	1.78e-14	3.08866	2.25075	1.48088	1.29258	1.11326	0.830373	0.468119	1.34171	1.35763	0.10017	1.75744	2.68245	0.592706	3.27661
513	2.54442	2.8238	2.6571	-0.189025	1.43772	3.0679	4.70762	3.88646	3.28016	4.96254	5.34928	3.35117	5.32878	6.00013	5.60415	3.2815	12.6543	28.8895	7.83e-14	1.23e-13	3.0777	2.23898	1.70279	0.581836	0.10018	0.9599	0.101026	1.48441	1.40198	0.10017	1.88343	2.66256	0.132626	3.23426
515	2.55887	2.50825	0.90391	-2.22985	1.57836	2.58546	3.0374	3.62266	2.78957	4.34179	3.85657	3.35957	4.54846	4.44036	3.81619	3.42754	14.526	29.1884	6.8e-14	1.08e-13	3.07226	2.23824	0.92002	1.2918	0.978635	0.103293	0.101026	1.40045	1.13056	0.10017	1.53709	2.65756	0.106495	3.19902
516	0.211625	0.325855	0.259756	-0.419057	-0.117489	-0.220795	-0.119407	-0.214171	0.233355	0.615977	0.694293	0.350501	1.25368	1.77292	1.65753	1.06583	15.4872	13.1429	2.18e-09	2.38e-09	2.78102	1.99822	0.101372	0.100986	0.10018	0.103293	0.101026	0.101889	0.100977	0.10017	0.103274	2.53505	0.106495	0.460036
517	0.211015	0.538356	0.332567	-0.223298	-0.0676039	-0.0279245	-0.00706669	-0.182158	0.201771	0.390313	0.324488	0.0347171	0.745493	1.11418	1.18548	0.512118	16.088	5.9016	1.61e-05	1.65e-05	2.8439	2.11445	0.101372	1.37879	0.10018	0.103293	0.101026	0.101889	0.100977	0.10017	0.103274	2.59292	0.106495	0.45375
518	2.94939	3.1199	3.34357	-0.815353	2.01551	3.36763	4.79557	4.43366	3.27342	5.35769	6.09499	4.32329	6.01592	7.10518	6.50567	4.429	13.7384	48.1333	6.58e-17	3.02e-16	3.07693	2.2112	1.68829	0.895618	0.826375	0.814881	0.101026	1.36694	0.54377	0.10017	1.85444	2.64338	0.106495	3.22952
520	2.32373	4.43825	4.7302	-1.08e-10	0.849771	4.15804	5.9534	8.06057	2.3174	6.00646	8.14963	9.35647	4.27756	5.49842	8.76174	9.76739	13.2188	87.7158	1.24e-20	6.18e-19	3.17374	2.1519	1.63698	2.37089	1.21754	0.103293	0.67981	1.21574	1.53196	0.10017	0.963138	2.57634	0.106495	3.41395
522	1.10507	3.14954	1.9968	-5.21541	0.284816	2.42642	3.79539	5.28154	2.02416	4.80065	5.24881	5.054	3.72555	4.67464	4.54655	4.27255	12.7067	35.0438	1.29e-14	2.43e-14	3.07611	2.19923	1.35713	0.100986	0.419933	0.440789	0.101026	1.32681	0.599234	0.10017	0.932546	2.59138	0.644547	3.21723
523	0.563468	2.96843	3.31156	0.408495	0.826784	3.09409	4.35554	6.88793	0.701852	4.50542	6.82102	8.60953	1.26852	2.21596	6.18901	8.48702	14.2194	139.71	1.42e-23	9.5e-21	3.18221	2.19421	1.49849	2.46712	1.033	0.103293	0.101026	1.18506	1.55395	0.10017	0.103274	2.48371	0.106495	3.39044
524	2.32307	3.16999	5.36329	3.16784	2.32307	4.64602	5.83326	9.25543	-1.73e-10	3.69738	9.71982	11.8874	-1.73e-10	3.69949	9.50931	12.1292	12.8301	104.595	5.82e-20	1.83e-18	3.18842	2.11406	1.65596	2.60871	1.25343	0.103293	0.101026	0.999069	1.31175	0.10017	0.103274	2.38208	0.159116	3.42143
528	-0.274651	-0.63771	-0.0628781	0.185217	-0.184395	-0.53554	-0.974285	-1.33599	-0.52769	-1.53036	-1.78148	-1.78076	-2.02286	-1.91266	-1.50538	-1.72539	16.0453	27.6492	8.34e-14	1.31e-13	2.95009	2.18585	0.101372	1.43664	0.10018	0.103293	0.101026	0.772126	1.40333	0.10017	0.103274	2.62012	0.106495	0.101254
529	1.91715	2.53229	0.420581	-2.63785	0.872851	2.55026	2.79482	3.97625	2.04059	4.26453	3.41513	3.72072	3.68027	3.93498	2.96324	3.13632	14.001	25.6986	3.81e-13	5.4e-13	3.08173	2.23138	0.101372	1.32483	0.10018	0.103293	0.101026	1.37916	1.32655	0.10017	1.12579	2.65112	0.106495	3.2081
530	-0.309525	2.60679	2.00291	-0.930336	-0.50004	2.51477	4.11495	5.95493	0.191949	4.38211	5.49849	6.12856	0.295959	2.09844	4.21561	5.48908	14.9366	64.2181	1.1e-18	1.35e-17	3.138	2.23187	1.60233	1.39157	0.831364	0.103293	0.101026	1.24142	1.53707	0.10017	0.103274	2.60148	0.149099	3.34578
532	2.11494	2.97884	2.88568	-2.53183	1.39648	2.95095	4.41789	5.48147	2.13063	4.65093	6.185	6.64086	4.11379	5.043	6.82993	6.95567	13.473	46.9784	9.27e-17	3.9e-16	3.14182	2.18433	1.65671	2.14576	1.14196	0.103293	0.101026	0.959308	1.25742	0.10017	1.33592	2.57998	0.106495	3.29813
533	3.70739	6.27358	6.10873	3.17022	-3.99e-14	6.59342	6.99302	9.3888	3.6987	7.60311	8.8473	11.9522	5.02988	6.01409	9.60947	12.5816	13.0767	70.0069	3.3e-18	3.08e-17	3.19179	2.11813	0.101372	2.60785	1.1607	0.103293	0.101026	1.05935	1.44246	0.10017	0.241552	2.43293	0.106495	3.40686
535	0.189833	0.575542	0.464538	-0.152314	-0.0673212	0.0236879	0.155797	-0.0163658	0.218827	0.515459	0.582488	0.288409	0.88989	1.34102	1.4739	0.830392	15.969	7.42257	1.55e-06	1.59e-06	2.82889	2.08711	0.101372	1.40409	0.10018	0.103293	0.101026	0.101889	0.100977	0.10017	0.103274	2.57735	0.106495	0.212808
537	3.04065	5.1035	2.53668	0.00336552	3.51855	4.15658	4.60589	6.8335	3.41493	6.49998	6.3236	8.41513	5.38155	5.57809	7.47175	9.05623	12.3829	36.0171	3.79e-15	8.57e-15	3.15243	2.12081	0.101372	1.92241	1.15258	0.103293	0.369039	1.33028	1.66394	0.10017	0.916465	2.44315	0.106495	3.41607
538	0.246987	2.5619	1.48055	-1.83381	-0.467161	2.49418	4.08837	5.44004	0.721247	4.25044	5.13817	5.39729	1.56779	2.9133	4.20696	4.92946	14.1771	42.7639	3.47e-16	1.11e-15	3.11106	2.20661	1.49819	0.100986	0.567713	0.103293	0.181114	1.34036	1.3366	0.10017	0.103274	2.5929	0.106495	3.28132
539	0.48646	2.16527	3.2641	-0.448949	-0.714947	2.38132	4.87533	6.64372	-0.241248	4.45285	7.04217	7.46756	-0.261553	3.73142	5.81319	7.09059	13.9203	89.0268	1e-20	5.77e-19	3.13904	2.17929	1.69395	1.89465	0.703125	0.103293	0.101026	0.695436	0.771748	0.10017	0.103274	2.53404	0.106495	3.2484
540	1.55998	2.68049	0.968051	-1.1543	0.456957	2.22819	3.26147	4.38395	1.82515	3.99734	3.56105	3.42919	2.27893	3.01413	2.21764	2.12802	13.0244	22.7131	1.99e-12	2.53e-12	3.0431	2.22443	0.101372	0.949135	0.10018	0.103293	0.101026	1.28401	0.142268	0.10017	0.103274	2.61907	0.106495	2.94831
543	-0.231664	-0.352635	0.214212	0.259124	-0.197926	-0.4883	-0.677237	-0.792465	-0.522735	-1.22439	-1.1022	-0.950521	-1.47218	-1.29158	-0.787537	-0.951358	14.2353	8.57198	2.6e-07	2.71e-07	2.92783	2.1745	0.101372	1.49738	0.10018	0.103293	0.101026	0.101889	1.29304	0.10017	0.745411	2.61868	0.106495	0.101254
544	-0.201418	-0.519559	-0.446108	-0.278087	-0.281955	-0.69285	-1.27389	-1.8926	-0.442183	-1.59902	-2.61098	-2.8956	-1.57953	-2.28805	-3.12053	-3.47359	16.3971	53.5879	1.44e-17	9.55e-17	2.96908	2.22756	0.101372	0.494478	0.10018	0.103293	0.101026	1.2589	1.19134	0.10017	0.103274	2.63568	0.106495	0.567857
546	0.720283	2.62717	1.60762	-1.47681	-0.496102	2.68608	3.80335	5.30543	0.670079	4.30331	5.16949	5.72839	1.13355	2.45284	3.95411	5.175	14.833	47.5144	7.9e-17	3.42e-16	3.12405	2.20208	1.36243	1.71869	0.36731	0.103293	0.101026	1.31868	1.43993	0.10017	0.103274	2.58523	0.106495	3.29546
549	0.382945	2.56722	1.87457	-1.79807	-0.682092	2.05655	4.51072	6.17437	0.118363	4.48864	6.01679	6.00912	1.30136	3.49122	4.83248	5.55564	13.4059	50.6755	3.18e-17	1.72e-16	3.13125	2.24673	1.69831	0.100986	0.994734	0.103293	0.101026	1.3802	0.922373	0.10017	0.182245	2.61771	0.106495	3.31074
550	1.16392	2.89355	3.6335	0.390367	-1.37629	2.49089	5.33713	6.90736	1.50737	5.10532	6.97337	6.61629	2.23789	4.14719	5.84282	6.25128	12.4151	49.5505	4.37e-17	2.21e-16	3.12777	2.21846	1.76868	1.23688	1.16213	0.809614	0.101026	1.29235	0.161024	0.10017	0.262241	2.61276	0.106495	3.30186
551	0.891186	2.28192	-0.0963142	-3.12019	-0.166686	2.26147	2.81641	4.21135	1.39192	3.77423	3.03549	4.03663	1.87647	2.58922	2.56863	3.52323	12.4915	18.9708	2.11e-11	2.46e-11	3.08155	2.22826	0.101372	0.100986	0.828413	0.103293	0.534209	1.28776	1.09486	0.10017	0.103274	2.60194	0.106495	3.19237
552	0.377283	2.2145	2.30227	-0.576605	-1.52745	2.32944	4.24145	5.72101	1.10436	4.75273	5.99675	5.13036	1.85316	4.2684	4.69287	4.3646	12.8496	36.1554	3.6e-15	8.22e-15	3.10306	2.20914	1.65268	1.27147	0.399051	0.103293	0.101026	1.25048	0.114379	0.83742	0.617503	2.64607	0.106495	3.21684
553	-0.527093	2.57039	3.05848	1.34525	-1.37626	1.91755	4.23677	7.05292	-0.527093	3.44679	6.49709	7.96434	-0.527093	0.944651	5.10305	7.58515	12.7199	71.9806	2.14e-19	4.09e-18	3.17976	2.20341	1.73802	2.24466	1.10537	0.818411	0.101026	0.891189	1.65958	0.318274	0.103274	2.57491	0.106495	3.41862
554	4.0888	5.83199	6.40262	3.16995	3.70245	5.93037	7.52904	9.92627	3.69851	7.81943	10.1312	11.5202	4.85626	5.83723	9.67816	11.591	12.7009	56.4154	2.01e-17	1.24e-16	3.18749	2.19552	1.62196	2.45172	1.18745	0.103293	0.734145	1.32893	1.44999	0.451683	0.103274	2.54684	0.106495	3.41988
555	1.13429	3.29052	3.15711	-0.00581804	0.375138	2.78794	4.8848	6.90661	0.744672	5.03518	6.94196	7.44524	1.08579	3.38365	5.80636	7.04832	14.6344	72.9504	1.76e-19	3.64e-18	3.15214	2.24435	1.68718	1.86957	1.09091	0.521967	0.101026	1.30122	1.27069	0.10017	0.144368	2.59035	0.106495	3.36351
556	-0.956619	-0.26328	0.484616	0.236976	-0.533556	-0.292749	-0.159162	-1.71409	-1.23633	-1.31718	-2.12887	-3.56004	-2.95572	-2.81836	-3.34588	-5.46641	14.0469	28.661	8.72e-14	1.36e-13	3.02122	2.28999	1.46108	1.35879	0.10018	0.103293	0.101026	1.41375	1.49481	0.421761	0.103274	2.67427	0.106495	0.101254
558	0.131724	2.32	1.57903	-1.78378	-0.882523	1.98695	3.87875	5.3364	0.528377	4.17447	5.22778	5.09834	0.344605	2.76477	3.34427	3.92219	14.1677	43.8983	2.4e-16	8.32e-16	3.09717	2.21135	1.42335	1.40238	0.10018	0.103293	0.101026	1.16956	0.854075	0.10017	0.103274	2.62447	0.106495	3.2282
559	1.86593	3.76342	2.29083	0.180047	0.799548	3.97935	4.10606	6.2845	2.21289	5.15848	5.60034	7.60655	2.15991	3.18298	5.29195	7.77214	13.5155	46.6326	1.03e-16	4.24e-16	3.16792	2.19122	0.101372	2.20583	0.965192	0.171011	0.101026	1.19683	1.40957	0.10017	0.103274	2.51822	0.106495	3.35414
560	-3.97e-12	2.93493	4.13623	0.918413	-0.00779052	3.36777	4.45359	7.70418	1.22735	4.61202	7.6017	9.40324	0.527143	2.65493	7.04938	9.34734	13.5393	143.193	3.37e-24	4.71e-21	3.18928	2.18539	1.69943	2.48244	1.22628	0.103293	0.101026	1.23656	1.59323	0.10017	0.103274	2.5065	0.106495	3.43111
562	0.807453	0.550799	0.166193	0.269323	0.304988	0.271005	-0.260246	0.375474	0.886062	0.669953	0.273561	0.51984	1.14817	1.29533	1.29511	1.53078	12.5957	4.26252	0.000296776	0.000299437	2.82851	2.07047	0.101372	0.100986	0.10018	0.103293	0.101026	0.101889	0.100977	0.10017	0.936792	2.575	0.106495	0.832781
563	0.646892	2.17095	1.45041	-0.0138192	0.475552	2.46431	3.24258	4.36037	0.923463	3.17002	4.21372	5.35978	0.579727	1.39169	3.07692	4.99006	13.4147	50.3726	3.07e-17	1.67e-16	3.1293	2.18081	1.36152	2.08828	0.811577	0.103293	0.101026	0.532391	1.49125	0.10017	0.356914	2.56262	0.106495	3.13354
564	0.635578	2.59678	1.28696	-1.39276	-0.218948	2.46033	3.49304	4.99593	1.01225	4.18205	4.60332	5.3505	1.33677	2.454	3.84077	4.80533	14.9116	42.9198	3.3e-16	1.07e-15	3.11858	2.22663	1.46371	1.32096	0.746917	0.103293	0.101026	1.21939	1.55885	0.10017	0.58737	2.57754	0.125762	3.29808
567	0.388645	0.706624	0.255539	-0.318723	0.157232	0.154802	-0.00975217	-0.0522728	0.493704	0.653855	0.50905	0.166738	0.979302	1.28749	1.29472	0.65103	14.9209	5.75558	2.06e-05	2.1e-05	2.85039	2.13053	0.101372	1.51241	0.10018	0.103293	0.101026	0.101889	0.100977	0.10017	0.103274	2.60918	0.106495	0.781612
569	0.557531	2.82563	2.94976	-0.218509	-0.347782	2.5871	4.56858	6.57578	0.629623	4.49165	6.66068	7.57406	1.41238	3.45591	5.91906	7.25258	14.6766	119.582	1.38e-22	4.62e-20	3.15918	2.19587	1.61977	2.13271	0.93426	0.103293	0.101026	0.922357	1.31152	0.10017	0.519788	2.56412	0.106495	3.33584
570	1.87337	3.15428	2.62571	-1.19887	0.649031	3.02499	3.90568	5.78622	2.39957	4.8049	6.1012	6.98175	3.39653	4.29956	6.53416	7.14276	13.5612	63.5437	1.28e-18	1.47e-17	3.14105	2.12777	1.45327	2.11725	0.907214	0.701792	0.101026	1.32011	1.54126	0.10017	1.04711	2.53005	0.397465	3.37092
572	6.26719	7.77324	7.09667	3.17162	5.23888	7.03416	8.45654	10.3641	5.63172	9.29956	10.7497	11.8578	8.19525	9.31784	11.6367	12.338	13.5667	93.2467	9.64e-21	5.77e-19	3.15264	2.14842	1.5475	2.12231	1.20699	0.604062	0.101026	1.26208	1.30662	0.10017	1.11759	2.48565	0.106495	3.38921
573	0.469457	2.5946	2.98312	-0.285484	0.260326	3.08833	4.29064	6.65398	0.246635	4.23834	6.34181	8.6665	0.785717	2.0307	5.77151	8.62007	13.9058	112.438	3.38e-22	7.07e-20	3.19033	2.18764	1.36958	2.48201	1.06624	0.103293	0.101026	0.835915	1.50869	0.10017	0.103274	2.4701	0.106495	3.39044
574	1.23077	3.65906	3.24094	1.21079	-0.480058	2.86203	4.73358	6.81745	0.0424408	4.83463	6.55523	7.00158	1.68936	2.78867	5.36096	6.63888	12.3231	43.9485	2.37e-16	8.22e-16	3.15634	2.28126	1.77273	2.09812	1.14466	1.08391	0.101026	1.3834	1.4177	0.554293	0.468783	2.63441	0.106495	3.37044
575	3.16867	5.35549	6.66215	3.17123	2.32128	5.04335	6.65716	9.90563	3.7011	6.81641	10.0789	11.5161	3.16995	4.85748	9.51528	11.3809	12.5692	83.4098	8.91e-20	2.38e-18	3.197	2.21775	1.76584	2.5907	1.04775	0.103293	0.53245	1.31384	1.57935	0.541392	0.103274	2.5411	0.106495	3.42145
576	-0.405709	0.151705	0.227779	-0.550287	-0.766539	-0.299911	0.0735542	-1.06937	-0.760321	-0.756131	-1.77039	-2.58667	-0.806641	-1.59882	-2.5921	-3.2501	14.0501	20.2602	6.45e-12	7.74e-12	2.97855	2.21923	1.21674	0.673755	0.10018	0.103293	0.101026	1.2518	0.366719	0.10017	0.103274	2.62878	0.106495	0.101254
577	2.01948	3.30321	1.89137	-1.50701	1.6366	3.2692	3.826	5.47522	2.24435	5.06522	5.40919	5.80178	4.27081	4.57628	5.5405	5.82443	13.191	33.3506	1.1e-14	2.12e-14	3.12459	2.2455	1.41405	1.61755	1.09082	1.01333	0.101026	1.39929	1.37655	0.10017	1.1287	2.61247	0.106495	3.34853
578	-0.304737	0.328366	0.280764	0.261157	0.300551	0.508191	0.0728379	-1.52025	0.0118674	-0.397112	-1.45692	-2.85693	-2.00568	-2.52762	-2.86099	-4.89391	12.8796	13.7405	1.26e-09	1.38e-09	3.02714	2.30833	1.37038	1.71959	0.785038	0.103293	0.830656	1.3874	1.639	0.10017	0.726009	2.67386	0.331798	1.23245
579	1.07938	2.78761	2.18777	-0.383741	-0.396769	2.52328	3.92017	5.95691	0.577071	4.58064	5.60847	6.43874	2.43825	3.54503	5.39158	6.39188	14.1998	59.8479	3e-18	2.85e-17	3.14083	2.21339	1.65104	1.3799	1.16933	0.103293	0.101026	0.92543	1.51186	0.10017	0.851668	2.57531	0.106495	3.35887
580	0.550275	2.74283	2.85987	-0.00708924	-0.37645	2.60342	4.72172	6.22375	-0.00708924	4.49553	6.95119	7.00217	-0.00708924	3.41062	5.86349	6.61408	12.6939	70.7162	1.65e-19	3.42e-18	3.13313	2.17094	1.6937	1.83416	1.13504	0.103293	0.101026	1.31107	0.207191	0.10017	0.103274	2.55852	0.106495	3.27844
581	-0.345053	-0.608882	-0.358597	0.0324147	-0.0714131	-0.469127	-1.16486	-2.08162	-0.489374	-1.72991	-3.04915	-3.81408	-2.5588	-3.62521	-4.79682	-5.39954	16.9417	125.498	6.82e-23	2.8e-20	2.98951	2.24894	0.268897	1.07915	0.198656	0.103293	0.101026	1.31131	1.51424	0.10017	0.103274	2.64741	0.106495	0.743015
583	-0.239946	2.10731	3.03556	-0.549365	-2.31202	2.39406	4.67324	6.49285	0.723337	4.1924	6.69579	6.9596	0.847184	3.10859	5.22902	6.07969	13.0483	86.8696	5.76e-21	4.19e-19	3.15496	2.22846	1.75358	2.16589	0.10018	0.103293	0.503793	1.02335	1.27348	0.10017	0.103274	2.62545	0.106495	3.28984
586	0.117597	0.291217	0.312808	-0.391869	-0.2656	-0.204772	-0.0975233	-0.26011	0.0270529	0.381381	0.494803	0.117942	0.85327	1.35552	1.37095	0.646842	16.4198	9.60362	9e-08	9.51e-08	2.81434	2.06479	0.101372	0.580369	0.10018	0.103293	0.101026	0.101889	0.100977	0.10017	0.103274	2.56997	0.106495	0.101254
587	0.429013	2.55924	1.47047	-1.36228	-0.018735	2.24642	3.7262	5.34815	0.862424	4.18595	5.15231	5.89878	1.40077	2.82515	4.28076	5.65685	14.6735	54.8517	1.04e-17	7.45e-17	3.11445	2.15229	1.33254	1.43535	0.842614	0.103293	0.101026	0.990771	1.33956	0.10017	0.266975	2.55442	0.106495	3.299
588	0.0139923	0.000550587	0.321633	-0.029957	-0.252214	-0.31728	-0.192014	-0.365063	-0.111761	0.0129279	0.0647796	-0.14393	0.452577	0.952387	0.915024	0.437897	16.173	4.69087	0.000137522	0.000139688	2.83107	2.04364	0.101372	0.135856	0.10018	0.103293	0.101026	0.101889	0.100977	0.10017	0.103274	2.56841	0.106495	0.356887
589	-1.37681	2.46179	2.62454	-2.30945	-0.125433	2.17161	4.75296	6.17441	-0.251335	4.28625	6.09953	5.73824	0.132508	2.73907	4.17617	4.46622	13.1955	41.289	5.67e-16	1.63e-15	3.11002	2.23878	1.78752	0.948453	0.159157	0.78685	0.101026	1.26553	1.24844	0.10017	0.103274	2.61333	0.443544	3.2619
590	1.90735	3.66896	2.04747	-0.670252	0.871615	3.9561	4.27425	5.95776	2.07057	5.26221	5.40863	7.15837	2.26777	3.14897	4.8174	7.09685	13.9686	44.7207	1.85e-16	6.82e-16	3.14882	2.16848	0.101372	2.04282	0.687539	0.103293	0.101026	1.21031	1.45085	0.10017	0.103274	2.54682	0.106495	3.31654
591	1.3371	3.85197	2.50213	-1.13037	0.5206	3.56462	4.81464	6.39184	1.88135	5.17489	6.08214	6.55944	2.08976	3.1485	5.01868	5.73839	13.1194	33.8583	8.91e-15	1.78e-14	3.11536	2.1978	1.53504	0.100986	0.818205	0.26189	0.274231	1.27179	1.46265	0.355477	0.265096	2.60104	0.783121	3.3133
593	0.792738	3.01061	2.38051	-0.73073	-0.0169091	3.24284	4.68541	6.69956	1.49776	4.71072	5.98894	7.39301	1.40474	3.00874	5.05386	7.12426	13.065	55.6975	8.34e-18	6.1e-17	3.14511	2.18844	1.36115	0.979378	0.807522	0.103293	0.101026	0.31231	1.36943	0.392839	0.103274	2.52411	0.106495	3.33499
597	1.97235	3.03699	0.905683	-1.29392	1.06699	3.04606	3.42456	4.89426	1.9351	4.58344	4.31908	5.19153	3.21804	3.83431	3.81302	4.99883	13.9922	30.6383	3.51e-14	5.87e-14	3.10217	2.19083	0.101372	1.57493	0.874001	0.103293	0.101026	1.11118	1.22256	0.326254	0.816763	2.61577	0.106495	3.2359
599	1.37854	4.0842	4.01723	1.37609	0.849266	4.28067	5.75089	7.792	1.37854	6.14489	7.46389	8.80852	1.76917	4.59945	6.50941	8.227	12.3018	60.5898	2.52e-18	2.47e-17	3.14893	2.17252	1.50504	1.89619	0.225461	0.464275	0.101026	0.334734	1.52386	0.10017	0.492521	2.51666	0.561741	3.33294
600	1.03506	2.86854	0.793874	-1.58799	0.327205	2.90091	3.0964	4.24724	1.24476	4.18724	3.52852	4.8558	1.25283	2.15217	2.71995	4.53537	13.5834	27.5972	1.46e-13	2.19e-13	3.10436	2.22571	0.101372	1.68132	0.121764	0.103293	0.101026	1.14577	1.49235	0.10017	0.103274	2.57405	0.106495	3.2036
602	-0.629684	-0.597712	0.300379	0.13899	-0.534999	-0.529217	-0.382261	-1.27978	-1.06771	-1.42616	-1.66741	-1.81543	-2.30758	-1.8997	-1.67851	-1.82108	15.3631	21.0791	5.33e-12	6.48e-12	2.95232	2.1833	0.870197	0.302774	0.10018	0.103293	0.101026	0.317934	1.40866	0.10017	0.103274	2.61562	0.106495	0.101254
603	-0.472273	-0.772898	-0.0983373	0.109114	-0.484945	-0.739224	-0.891986	-1.17942	-0.846216	-1.3791	-1.39115	-1.37439	-1.61589	-1.04785	-0.892986	-1.12572	15.5394	8.40221	4.04e-07	4.18e-07	2.92138	2.15492	0.101372	0.100986	0.10018	0.103293	0.101026	0.172613	1.33144	0.10017	0.103274	2.60473	0.106495	0.101254
604	-0.591655	2.74147	1.8287	-1.07714	-0.583469	2.408	4.41428	5.68946	0.451593	4.15461	5.38323	5.13337	0.863558	2.6533	4.14693	4.40713	13.252	34.3967	7.17e-15	1.47e-14	3.11901	2.23695	1.69469	0.764611	0.10018	0.103293	0.721506	1.32719	1.45446	0.10017	0.103274	2.64067	0.106495	3.27303
605	-0.229157	2.6144	1.82914	-1.34003	-1.34397	2.18843	4.07386	5.39531	0.533063	4.21498	5.71842	5.49099	0.985494	3.35084	4.60317	4.74297	13.1794	57.416	5.41e-18	4.39e-17	3.10401	2.18524	1.50177	1.53141	0.10018	0.103293	0.510322	1.29759	0.672183	0.10017	0.103274	2.58037	0.106495	3.23157
607	0.259743	0.695413	0.575757	-0.0344308	-0.0176241	0.134144	0.243829	0.181753	0.253617	0.717728	0.858769	0.409946	1.04412	1.58703	1.73832	0.848989	15.2587	8.39642	4.07e-07	4.21e-07	2.82474	2.09153	0.101372	1.49545	0.10018	0.103293	0.101026	0.101889	0.100977	0.10017	0.103274	2.5878	0.106495	0.101254
608	0.160328	0.536512	0.43169	-0.231717	-0.0970391	0.0327974	0.152643	0.0364269	0.190838	0.604828	0.735613	0.367228	1.02676	1.53079	1.64103	0.907511	15.6337	9.97315	5.83e-08	6.16e-08	2.81663	2.07301	0.101372	1.32094	0.10018	0.103293	0.101026	0.101889	0.100977	0.10017	0.103274	2.57689	0.106495	0.101254
609	0.0574258	0.215022	0.30133	-0.00722156	-0.223357	-0.172918	-0.265431	-0.359901	-0.0693501	-0.0173294	-0.0538542	-0.203355	0.243999	0.666409	0.771926	0.134638	15.7514	3.37727	0.00199792	0.00200773	2.85913	2.12735	0.101372	1.39576	0.10018	0.103293	0.101026	0.101889	0.100977	0.10017	0.103274	2.60359	0.106495	0.101254
612	0.92349	2.43186	0.33759	-1.83976	0.224937	2.41279	2.7273	3.74047	1.11011	3.72774	2.68233	3.31951	0.913007	1.53077	1.19582	2.59497	13.8224	20.9289	5.86e-12	7.07e-12	3.06176	2.21649	0.101372	1.1504	0.10018	0.103293	0.101026	1.19481	1.47269	0.10017	0.103274	2.62186	0.106495	3.11037
613	0.0257615	-0.157215	-0.219982	0.0676127	0.0288618	-0.296897	-0.751909	-1.30732	-0.119594	-0.899778	-1.72576	-2.0651	-1.02865	-1.39581	-1.61765	-1.94772	16.2434	24.4481	7.45e-13	9.98e-13	2.95722	2.20928	0.101372	1.37522	0.10018	0.103293	0.101026	1.02474	1.19693	0.10017	0.103274	2.62835	0.106495	1.07651
614	-0.299056	-0.721085	-0.251927	0.203624	-0.0111606	-0.521674	-1.30501	-2.23543	-0.519436	-1.97033	-3.12214	-3.75732	-2.92227	-3.95812	-4.4211	-5.42077	16.0921	133.859	9.25e-24	7.58e-21	3.00256	2.27	0.255488	1.37511	0.796763	0.103293	0.101026	1.2685	1.61796	0.10017	0.103274	2.65729	0.106495	0.101254
615	-0.560803	-0.672934	-0.968633	-0.149875	-0.0474076	-0.372843	-1.31819	-2.25775	-0.35051	-2.11117	-3.48204	-4.32595	-2.79306	-4.36328	-5.10203	-6.63681	14.0646	45.3869	1.51e-16	5.79e-16	2.99239	2.24861	0.275873	0.877982	0.535397	0.0969104	0.754963	1.37239	1.6093	0.10017	0.149644	2.64838	0.887135	0.780722
616	-0.382492	-0.772096	0.114196	0.319559	-0.371196	-0.613128	-0.72566	-0.955561	-0.737988	-1.46387	-1.34304	-1.2138	-2.0246	-1.64481	-0.969566	-1.04441	15.6442	12.2066	5.36e-09	5.79e-09	2.93405	2.15511	0.101372	1.17849	0.10018	0.103293	0.101026	0.237829	1.44061	0.10017	0.103274	2.61618	0.106495	0.101254
617	-0.571338	-0.744544	-0.680022	-0.0569086	-0.265844	-0.534362	-1.51217	-2.34689	-0.675892	-1.92654	-3.53402	-4.43503	-2.97311	-4.06411	-5.43631	-7.23257	15.3377	84.8194	2.01e-20	8.26e-19	2.98827	2.26544	0.391868	0.444588	0.10018	0.103293	0.101026	1.33227	1.61894	0.10017	0.749481	2.6555	0.347818	0.8998
619	-0.073355	0.467065	-0.0345423	0.0775365	0.101852	0.331345	0.623946	0.578113	-0.250597	0.775563	-0.33805	-0.524444	-1.21442	-1.29375	-1.844	-1.62473	12.8098	9.07107	1.44e-07	1.52e-07	3.00182	2.23579	0.286112	1.12786	0.10018	0.103293	0.101026	0.274345	1.37821	0.10017	0.103274	2.64576	0.120753	1.66398
623	3.2173	2.54817	1.73258	-1.60191	2.07036	2.97495	3.74796	2.51726	3.5772	4.514	4.13962	2.0413	5.52188	5.42169	4.29995	2.08741	14.4327	51.6182	2.45e-17	1.41e-16	3.06068	2.221	1.25503	1.32504	0.10018	0.630582	0.101026	1.3101	1.24901	0.10017	1.96072	2.6758	0.106495	3.15815
625	0.737348	2.72083	3.3692	-0.0212031	0.269223	2.47593	5.08509	6.61375	1.50393	4.58527	7.06514	6.94625	0.747205	3.76306	5.44906	6.08313	12.7021	49.3212	4.67e-17	2.3e-16	3.13116	2.20993	1.68967	2.05917	0.10018	0.541242	0.101026	0.837473	0.895204	0.513494	0.103274	2.5935	0.106495	3.16014
626	0.6809	3.44705	3.853	0.941779	-0.532562	2.83692	5.81488	7.80118	-0.0077374	5.17034	7.27791	7.85522	0.38519	3.15386	5.75972	7.52275	13.0998	58.1922	4.47e-18	3.8e-17	3.14092	2.22672	1.79153	1.00611	1.21163	0.706304	0.101026	1.09012	1.45766	0.10017	0.103274	2.59456	0.106495	3.37522
627	0.832718	2.91349	1.89952	-0.965027	-0.713445	2.87643	4.36565	6.23716	1.11841	4.74742	5.78502	6.23905	1.18226	2.457	4.25906	5.54414	13.2623	39.4326	1.08e-15	2.83e-15	3.12691	2.22466	1.49567	0.100986	1.01402	0.103293	0.101026	1.18625	1.31209	0.630618	0.103274	2.61369	0.303445	3.31345
630	-1.95111	2.3863	2.01464	-1.13645	-0.416786	2.11538	3.87306	5.19335	-0.422511	3.93331	4.73358	4.44248	0.0605558	1.69129	2.97581	3.16863	13.0409	26.0611	3.16e-13	4.53e-13	3.11609	2.29135	1.74116	0.612668	0.10018	0.335595	0.101026	1.4486	1.64678	0.10017	0.110827	2.65761	0.106495	3.2711
631	1.15956	2.39153	1.27083	-2.35542	0.228599	3.05041	3.88583	4.92461	1.65982	4.19362	4.70293	3.88004	2.02069	3.31584	3.0028	2.86631	12.2841	20.3387	8.52e-12	1.02e-11	3.07013	2.24651	1.30194	0.100986	0.10018	0.103293	0.101026	1.31002	0.778353	0.880315	0.280995	2.6358	0.106495	3.09031
632	2.08617	2.23191	0.949822	-2.69498	0.393915	2.41973	3.23863	3.65426	2.00103	4.02325	3.93728	3.93127	4.12411	4.37842	5.03714	4.41034	13.368	29.1207	7.02e-14	1.12e-13	3.08688	2.19765	1.50359	0.100986	1.05169	0.40587	0.703828	1.23041	1.52113	0.358312	1.56523	2.62856	0.106495	3.27508
633	-0.101755	-0.462755	-0.62743	0.312097	0.340934	-0.223726	-1.36747	-2.02108	-0.0657419	-2.10246	-3.21505	-3.64427	-2.40314	-4.2222	-4.56505	-6.22502	13.4892	41.9363	3.73e-16	1.16e-15	2.99937	2.26926	0.101372	1.6298	0.10018	0.591137	0.69875	1.31061	1.63621	0.10017	0.103274	2.65547	0.382901	0.993993
634	0.690401	2.82009	1.34291	-1.14689	0.0602669	2.45144	3.80262	5.11751	1.19469	4.23629	4.87164	4.85254	1.29942	2.28548	3.22576	3.7004	13.7963	33.6426	9.73e-15	1.91e-14	3.09215	2.2087	1.4737	1.14695	0.840881	0.103293	0.101026	1.2546	1.36165	0.10017	0.45994	2.62755	0.83595	3.22513
635	2.13059	2.97833	0.943041	-1.74351	1.47401	2.85246	3.04656	4.44165	2.26463	4.65077	3.89144	4.7379	4.20084	4.25426	3.94699	4.80552	12.9844	23.7527	1.09e-12	1.44e-12	3.09431	2.21247	0.101372	1.68275	0.72179	0.857586	0.101026	1.07998	1.35764	0.10017	1.14826	2.62236	0.106495	3.24597
636	-0.56994	-0.76295	0.0781206	0.00566913	-0.533773	-0.625396	-0.674735	-1.62328	-1.01113	-1.76217	-2.32364	-2.42865	-2.60171	-2.58795	-2.53387	-2.30419	14.1064	25.7602	2.22e-13	3.22e-13	2.94286	2.15169	0.843223	0.100986	0.10018	0.103293	0.101026	0.693526	1.46339	0.10017	0.368753	2.59239	0.106495	0.101254
638	-0.284057	2.11599	1.72554	-1.15873	-0.411108	2.32782	4.05053	5.19595	0.588983	3.70384	4.77981	4.67556	0.579145	2.2785	2.96423	3.7512	13.8438	44.1819	2.2e-16	7.75e-16	3.09587	2.24504	1.57406	0.100986	0.10018	0.103293	0.101026	0.961684	1.28784	0.10017	0.103274	2.62859	0.106495	3.14144
639	-0.288769	-0.310742	0.0424405	-0.106556	-0.469945	-0.553431	-0.556525	-0.814835	-0.567967	-0.52544	-0.472298	-0.687006	-0.222718	0.312426	0.296548	-0.285588	16.2184	3.06227	0.004029	0.00404115	2.86109	2.11392	0.101372	0.100986	0.10018	0.103293	0.101026	0.101889	0.558959	0.10017	0.103274	2.58709	0.106495	0.101254
640	1.04709	2.97198	2.57609	1.04375	0.832657	2.86737	4.40493	5.93585	0.993866	4.19344	5.52477	5.86585	0.971529	2.04533	4.18233	5.37637	14.0843	40.8268	6.64e-16	1.85e-15	3.12494	2.24918	1.72018	1.41908	1.13159	0.397412	0.101026	1.17182	1.55497	0.10017	0.225541	2.61477	0.106495	3.28026
641	0.957225	2.29158	1.26212	-1.84042	-0.105991	2.00424	3.46611	4.49263	1.17015	3.76638	4.09319	3.78199	1.66282	2.74623	2.519	2.6322	13.4935	24.8642	5.94e-13	8.08e-13	3.04392	2.20595	0.983228	0.883148	0.10018	0.103293	0.101026	1.07984	0.100977	0.10017	0.103274	2.59251	0.106495	2.9429
642	-0.106935	-0.707573	-0.522752	0.0604228	0.114425	-0.530431	-1.65091	-2.27231	-0.268449	-2.30844	-3.21721	-3.89985	-2.34838	-3.96353	-4.48853	-5.59908	14.4122	66.6638	2.84e-19	4.83e-18	2.99619	2.25348	0.101372	1.69896	0.10018	0.301876	0.101026	1.38004	1.55788	0.10017	0.337049	2.64224	0.106495	0.101254
643	-0.691848	2.32284	2.22513	-1.36573	-0.496969	2.45311	4.37315	5.68387	-0.227326	4.15475	5.37436	5.31099	0.241067	2.26972	3.78005	4.36203	13.6639	36.2739	3.44e-15	7.95e-15	3.10997	2.24057	1.74271	0.197804	0.163244	0.103293	0.101026	1.31419	1.5096	0.10017	0.103274	2.62048	0.106495	3.2587
644	0.958727	2.64913	1.78622	-0.695379	0.244335	2.60683	3.86404	5.09508	0.933802	4.32658	4.86263	4.63928	1.65936	2.99362	3.76501	3.89533	14.5275	30.0849	4.5e-14	7.37e-14	3.1085	2.25625	1.66993	1.23634	0.749219	0.137864	0.101026	1.32979	1.56799	0.552943	0.848643	2.65573	0.106495	3.27156
645	2.38405	3.57493	2.17822	-0.950103	0.879687	3.35942	4.07107	5.75247	2.13369	5.17401	5.28712	5.38004	3.61568	4.64405	4.038	4.62895	12.7291	23.7721	1.08e-12	1.43e-12	3.09851	2.22907	0.101372	1.63643	0.10018	0.103293	0.101026	1.34971	0.156917	0.10017	0.487864	2.64194	0.106495	3.18583
646	-1.9e-11	2.32018	5.92769	-1.9e-11	3.69545	4.39108	4.38772	8.88369	-1.9e-11	4.38772	9.13243	11.6022	-1.9e-11	4.08782	9.2016	11.9237	12.5584	108.87	5.83e-19	8.04e-18	3.21102	2.12768	1.63239	2.79419	1.19268	0.103293	0.101026	1.28685	1.5545	0.13369	0.103274	2.46146	0.106495	3.44973
648	-0.403392	-0.215276	0.72062	0.105873	-0.175606	-0.108593	0.25861	-1.50785	-0.706399	-1.04149	-1.72503	-2.99152	-1.97129	-2.30106	-3.44097	-4.39504	14.3544	42.5443	1.91e-16	7e-16	2.97466	2.11928	1.32684	1.14286	0.310863	0.103293	0.101026	1.14729	1.36677	0.10017	0.103274	2.61389	0.106495	0.394635
649	1.66126	1.65471	-0.0644424	-1.48301	0.828295	1.86456	1.7417	1.78374	1.84752	2.69114	1.31226	0.411561	1.90927	0.951994	0.161289	-0.929147	12.2497	12.0882	6.03e-09	6.48e-09	3.04367	2.28946	1.10487	0.100986	0.984516	0.103293	0.101026	1.4243	1.29495	0.380189	1.17968	2.68341	0.42069	2.71017
650	2.1803	3.61722	1.28195	-1.7768	1.13223	3.13699	3.23819	5.17819	2.53796	4.9948	4.37449	5.71689	3.69354	3.99795	4.5028	5.81853	13.1491	31.2286	2.7e-14	4.65e-14	3.12144	2.19934	0.101372	1.75336	0.946685	0.634511	0.101026	1.1395	1.55291	0.460553	0.97594	2.60541	0.106495	3.32226
652	0.314628	2.32151	1.09246	-2.39021	-0.63905	1.89823	3.72189	5.08974	0.942271	4.05822	4.74268	4.57219	1.63908	3.03017	3.33198	3.42357	13.2619	34.0043	8.39e-15	1.69e-14	3.07727	2.18619	1.19125	0.100986	0.10018	0.103293	0.101026	1.32906	0.562656	0.10017	0.103274	2.60935	0.106495	3.15864
653	0.550771	2.39977	1.78457	-5.04086	-0.395348	2.4172	4.04629	5.57348	1.43939	4.29658	5.36436	4.44607	1.8718	3.60552	3.69114	3.64043	12.2111	25.9385	6.9e-13	9.3e-13	3.08875	2.21674	1.42787	0.100986	0.10018	0.559967	0.254258	1.29486	0.100977	0.10017	0.103274	2.63805	0.106495	3.18309
654	0.586819	2.84712	1.91942	-1.73938	0.108675	2.4041	3.71433	5.37244	0.77628	4.46239	5.13844	5.42178	1.61211	3.14252	4.35748	4.83153	13.171	37.4064	2.24e-15	5.4e-15	3.12681	2.22792	1.52354	1.51438	0.10202	0.103293	0.101026	1.23136	1.52079	0.941463	0.634625	2.60419	0.106495	3.30614
655	0.494126	3.18428	0.994135	-1.84957	0.625121	2.88767	3.3922	4.75916	1.37856	4.71799	4.00481	4.43855	2.16307	2.2135	2.60445	3.42929	12.6734	15.9518	1.95e-10	2.19e-10	3.08593	2.21548	0.853563	0.100986	0.10018	0.431548	0.101026	1.32082	1.58372	0.369424	0.378998	2.64553	0.556654	3.25353
656	0.0752843	0.235963	0.253586	-0.480112	-0.317578	-0.270908	-0.182601	-0.291776	-0.0370803	0.361858	0.490456	0.14269	0.879013	1.44472	1.38943	0.713001	15.6514	9.53077	9.81e-08	1.04e-07	2.80771	2.06392	0.101372	0.100986	0.10018	0.103293	0.101026	0.101889	0.100977	0.10017	0.103274	2.56248	0.106495	0.101254
657	-0.96669	2.05002	2.90932	0.317553	-0.438245	2.70075	4.50884	6.53555	0.431065	4.13285	6.47559	7.52526	0.743017	2.82102	5.1229	6.83235	13.6507	88.7496	1.05e-20	5.93e-19	3.17012	2.23774	1.67047	2.23351	0.252631	0.103293	0.101026	0.973967	1.528	0.10017	0.103274	2.57252	0.106495	3.32692
658	-0.268705	-0.293886	0.0188596	-0.114476	-0.453416	-0.526012	-0.598023	-0.811994	-0.544028	-0.53703	-0.528739	-0.669926	-0.23036	0.289979	0.277712	-0.3351	15.9781	3.09848	0.00371259	0.00372746	2.86051	2.12425	0.101372	0.100986	0.10018	0.103293	0.101026	0.101889	0.560647	0.10017	0.103274	2.5925	0.106495	0.101254
660	1.33096	2.41608	1.62036	-0.643978	0.384283	2.35378	3.6458	4.73667	1.3783	4.23426	4.73962	4.47873	2.97211	3.7566	4.42297	4.44759	13.1647	23.7746	1.08e-12	1.43e-12	3.12217	2.26519	1.66739	0.100986	1.12792	0.103293	0.101026	1.42167	1.39735	0.10017	1.20922	2.67096	0.106495	3.30028
661	-0.564021	-0.377936	0.211396	0.140319	-0.444645	-0.34087	-0.301715	-1.53611	-1.05996	-1.22321	-2.11313	-2.59696	-2.45226	-2.57962	-2.84533	-2.43513	14.9503	50.0239	1.86e-17	1.16e-16	2.96956	2.20187	1.01294	0.98408	0.10018	0.103293	0.101026	0.407366	1.48674	0.10017	0.103274	2.61865	0.106495	1.01547
662	-0.612405	-0.0702806	0.264943	0.232897	-0.311438	-0.0582202	-0.195733	-1.73291	-0.858413	-1.04736	-2.20409	-3.31919	-2.5505	-2.82976	-3.47592	-4.77084	14.4777	34.1612	7.88e-15	1.6e-14	3.00704	2.27214	1.24026	1.73565	0.10018	0.103293	0.4217	1.0286	1.52092	0.10017	0.285112	2.6543	0.106495	0.998798
663	-0.491671	-0.796366	-0.960709	0.0115042	-0.0855185	-0.55904	-1.61094	-2.04382	-0.446508	-2.12743	-3.2333	-3.9545	-3.02918	-4.64322	-5.49548	-6.65224	13.0816	46.9409	4.65e-17	2.3e-16	2.98672	2.2626	0.101372	0.100986	0.10018	0.103293	0.101026	1.39669	1.60825	0.791327	0.103274	2.65183	0.571735	1.01464
664	-0.655285	-0.172119	0.0426903	0.11954	-0.104724	-0.169477	-0.407408	-1.89592	-0.770343	-1.25243	-2.59919	-3.85699	-2.5974	-3.2846	-4.31399	-6.03019	15.4768	46.916	9.44e-17	3.95e-16	3.01611	2.30843	1.1701	1.57594	0.10018	0.103293	0.101026	1.36722	1.53263	0.10017	0.234968	2.67394	0.106495	0.813501
665	-0.354173	-0.750939	-0.45404	0.16771	-0.0162308	-0.563835	-1.46769	-2.35641	-0.55461	-1.97347	-3.34217	-4.11314	-2.85319	-3.98998	-5.19583	-5.65032	15.6526	81.4032	3.64e-20	1.25e-18	2.98823	2.25046	0.128531	1.20229	0.10018	0.103293	0.101026	1.34798	1.62175	0.621097	0.103274	2.64082	0.106495	0.844454
666	-0.717209	-0.178471	0.596178	0.216423	-0.303099	-0.0795032	0.236764	-1.4046	-0.938597	-1.03675	-1.70881	-3.18959	-2.45875	-2.64055	-3.47614	-5.05449	14.6878	32.3156	1.69e-14	3.08e-14	2.98422	2.20256	1.41726	1.09128	0.10018	0.103293	0.101026	1.26988	1.49466	0.10017	0.103274	2.6311	0.106495	0.903657
669	-0.132805	-0.666024	-0.500671	0.20726	0.10894	-0.544596	-1.66139	-2.14442	-0.368076	-2.1074	-3.08868	-3.93689	-2.57231	-3.73729	-4.18851	-4.87417	13.9609	65.7735	3.46e-19	5.5e-18	2.99628	2.26516	0.101372	1.79984	0.10018	0.103293	0.101026	1.2436	1.56733	0.693548	0.517671	2.65257	0.106495	0.101254
670	-0.502832	-0.627165	-0.0310039	0.060126	-0.3015	-0.437869	-0.854936	-2.24675	-0.791171	-1.70159	-2.92218	-3.84541	-2.85922	-3.37439	-4.63512	-5.10447	15.9203	74.0666	1.42e-19	3.16e-18	2.98506	2.25618	0.879151	0.100986	0.707366	0.103293	0.101026	1.14323	1.57743	0.10017	0.103274	2.63683	0.106495	0.827343
671	-0.58043	-0.903636	-0.526967	-0.0675751	-0.393357	-0.829939	-1.44366	-2.33855	-0.877249	-2.16472	-3.36841	-3.86829	-3.01488	-3.80699	-4.90279	-5.19295	16.1889	95.7124	2.99e-21	2.87e-19	2.98682	2.26263	0.10429	0.100986	0.10018	0.103293	0.101026	1.30113	1.54615	0.10017	0.103274	2.64963	0.106495	0.101254
672	-0.158091	-0.432537	-0.40668	0.0612111	-0.0694145	-0.44373	-1.11347	-1.75773	-0.304339	-1.50009	-2.54133	-2.99669	-1.91838	-2.78126	-2.90638	-3.27954	15.5848	50.7233	1.64e-17	1.04e-16	2.97454	2.23793	0.101372	1.24325	0.10018	0.103293	0.433606	1.08392	1.402	0.10017	0.103274	2.62998	0.106495	1.02122
673	-0.606642	-0.471985	-0.0445276	0.200991	-0.186844	-0.418548	-0.889823	-2.257	-0.861623	-1.67261	-3.04948	-3.94247	-2.8846	-3.68495	-4.66456	-6.1891	16.3459	76.9729	8.15e-20	2.28e-18	3.00694	2.2966	0.926032	1.55592	0.10018	0.103293	0.101026	1.33233	1.59101	0.10017	0.103274	2.66135	0.106495	0.47268
674	-0.110064	-0.158586	0.104961	-0.166565	-0.190751	-0.438962	-0.555143	-1.84703	-0.42864	-1.31178	-2.47828	-3.34458	-1.43164	-2.23654	-3.28015	-4.57292	14.8056	48.0494	3.32e-17	1.77e-16	2.9768	2.22706	0.84443	0.100986	0.794023	0.103293	0.101026	1.27387	1.12148	0.159716	0.103274	2.63313	0.106495	0.101254
675	-0.0931701	-0.511133	-0.351052	0.226587	0.132051	-0.317707	-1.37041	-2.10794	-0.196406	-1.74382	-2.79887	-3.57355	-2.34987	-3.4983	-3.81362	-4.45462	15.6496	67.0201	5.95e-19	8.2e-18	2.99071	2.25735	0.101372	1.62434	0.318938	0.103293	0.101026	1.20469	1.55957	0.10017	0.497205	2.64031	0.106495	0.962277
676	-0.509752	-0.836605	-0.414777	0.111936	-0.193849	-0.565878	-1.36898	-2.43953	-0.704784	-2.04872	-3.47316	-4.23216	-3.15081	-4.11317	-5.3131	-5.65876	16.3242	89.4024	9.41e-21	5.77e-19	2.98752	2.25489	0.365769	1.16635	0.10018	0.103293	0.101026	1.31919	1.64631	0.10017	0.321367	2.64509	0.106495	0.750738
677	-0.633214	-0.341023	-0.101031	0.297452	-0.0742463	-0.330578	-0.842761	-2.34427	-0.818902	-1.58766	-2.95875	-3.94369	-2.8374	-3.51886	-4.40367	-6.80937	14.6716	53.932	1.32e-17	9e-17	3.02772	2.33308	0.942935	1.8699	0.10018	0.103293	0.101026	1.35363	1.60888	0.10017	0.103274	2.68652	0.106495	0.908924
678	-0.364609	-0.584657	-0.278722	-0.00568924	-0.254938	-0.439937	-1.07168	-2.19878	-0.542291	-1.66416	-3.21203	-4.18942	-2.4569	-3.41846	-5.0033	-5.67091	15.7677	66.9109	6.09e-19	8.28e-18	2.98243	2.2523	0.755862	0.100986	0.10018	0.103293	0.101026	1.33243	1.52139	0.10017	0.597775	2.64219	0.106495	0.943065
679	-0.8171	-0.475056	0.14703	0.211892	-0.373929	-0.379483	-0.536927	-2.17297	-1.13915	-1.57053	-2.6895	-3.88597	-3.14305	-3.44118	-4.64288	-5.60078	16.1852	58.6305	4.02e-18	3.55e-17	3.00677	2.2768	1.1493	1.36286	0.10018	0.103293	0.101026	1.20873	1.62265	0.10017	0.103274	2.66305	0.106495	0.742416
680	-0.663585	-0.354449	-0.0395856	0.267951	-0.0388768	-0.175859	-0.532983	-2.05432	-0.72555	-1.32389	-2.59957	-3.78863	-2.83583	-3.51873	-4.71787	-5.92523	15.3328	58.7092	3.94e-18	3.5e-17	3.0008	2.26797	1.05469	1.54355	0.10018	0.103293	0.101026	1.3325	1.62434	0.10017	0.103274	2.65787	0.246304	1.02614
681	-0.331165	-0.726496	-0.55853	-0.148342	-0.0801333	-0.780469	-1.58976	-2.25699	-0.598533	-2.12323	-3.32071	-3.8838	-2.53284	-3.32071	-5.09608	-5.29136	14.426	57.0644	3.22e-18	3.02e-17	2.98208	2.25293	0.101372	0.100986	0.210528	0.103293	0.101026	1.31789	1.452	0.818736	0.103274	2.63579	0.106495	0.101254
682	-0.276355	-0.929659	-0.558615	0.121986	-0.0331544	-0.73354	-1.78753	-2.45048	-0.510324	-2.24789	-3.40789	-4.2449	-2.98013	-3.82168	-5.0948	-6.13043	14.1808	71.2033	1.08e-19	2.65e-18	2.9923	2.26464	0.101372	0.100986	0.828278	0.103293	0.101026	1.41025	1.62061	0.604703	0.103274	2.65633	0.106495	0.101254
683	-0.415551	-0.944885	-0.486977	0.0907133	-0.123934	-0.71999	-1.66525	-2.41679	-0.63572	-2.26694	-3.48271	-3.93553	-3.13708	-4.19759	-5.04212	-5.59809	16.2296	106.965	6.98e-22	1.08e-19	2.98963	2.26783	0.101372	1.05661	0.384476	0.103293	0.101026	1.3259	1.63495	0.10017	0.103274	2.64925	0.106495	0.101254
684	-0.0509568	-0.0611056	-0.132862	0.188274	-0.194129	-0.366541	-0.803242	-1.04725	-0.338851	-1.09917	-1.66425	-1.59426	-1.07226	-1.21923	-1.06526	-1.48767	13.735	9.00172	1.49e-07	1.56e-07	2.95466	2.20245	0.101372	1.18999	0.10018	0.103293	0.780947	0.145628	1.15166	0.10017	0.103274	2.62544	0.106495	0.823841
685	-0.423251	-1.08583	-0.664555	0.0727282	-0.178854	-0.723208	-1.75341	-2.41759	-0.57901	-2.32416	-3.51025	-4.02339	-3.23487	-3.99294	-5.44812	-5.71112	15.3216	87.6905	9.93e-21	5.77e-19	2.98252	2.234	0.101372	0.100986	0.191714	0.103293	0.101026	1.35212	1.67304	0.10017	0.103274	2.64561	0.106495	0.713862
686	-0.347238	-0.572296	-0.220116	0.116902	-0.191484	-0.585372	-1.09877	-1.83656	-0.633363	-1.68658	-2.53796	-2.59999	-2.21358	-2.85503	-2.75305	-3.20185	16.1856	82.7395	1.18e-20	6.18e-19	2.98333	2.24765	0.101372	1.66758	0.10018	0.103293	0.101026	1.15264	1.45201	0.10017	0.103274	2.6436	0.106495	0.101254
687	-0.49474	-0.0856777	0.637992	0.276542	-0.196376	0.030602	0.247046	-1.23459	-0.616116	-0.958206	-1.73211	-3.14271	-2.14957	-2.97917	-2.78495	-5.22706	13.3574	23.1054	1.58e-12	2.05e-12	3.00193	2.26563	1.42522	0.100986	0.906055	0.617068	0.101026	1.30211	1.51764	0.10017	0.103274	2.65101	0.106495	0.962161
688	-0.416161	-0.886449	-0.312099	0.138557	-0.36519	-0.64595	-1.19135	-1.67988	-0.784222	-1.74512	-2.46487	-2.58269	-2.55244	-2.63433	-2.59655	-2.51686	15.6623	55.0974	4.58e-18	3.88e-17	2.96756	2.21301	0.101372	0.100986	0.10018	0.103293	0.101026	0.852747	1.53427	0.10017	0.103274	2.63463	0.106495	0.887537
689	-0.0799358	-0.652968	-0.339205	0.328641	0.241709	-0.372622	-1.47052	-2.15239	-0.229214	-2.01909	-3.10891	-3.70876	-2.61304	-4.03628	-4.45903	-5.16774	14.8991	96.5157	1.21e-21	1.59e-19	2.99911	2.26259	0.101372	1.77855	0.813071	0.103293	0.101026	1.29334	1.61805	0.399847	0.103274	2.64844	0.106495	0.329842
690	-0.194965	-0.712532	-0.805341	0.116768	0.0405865	-0.539691	-1.85418	-2.44324	-0.283323	-2.29135	-3.41286	-4.42072	-2.47383	-4.38118	-5.03978	-6.65049	14.4304	76.5636	3.71e-20	1.25e-18	2.99691	2.27257	0.101372	1.47429	0.10018	0.26083	0.48353	1.39714	1.62466	0.10017	0.65151	2.64814	0.106495	0.813612
691	-0.965187	-0.471323	0.180029	0.0442939	-0.651334	-0.411075	-0.394618	-1.85485	-1.19604	-1.60557	-2.5054	-3.96389	-3.21056	-3.15331	-4.37003	-5.8436	15.2858	49.1436	4.91e-17	2.41e-16	3.00317	2.27423	1.29196	0.100986	0.10018	0.103293	0.101026	1.34328	1.55522	0.10017	0.103274	2.65571	0.106495	0.430616
692	-0.698547	-0.427275	0.345273	0.0847976	-0.434634	-0.426363	-0.448924	-2.06918	-1.16879	-1.52027	-2.46674	-3.14241	-2.90721	-3.20151	-3.96091	-4.74566	13.9799	54.7536	5.02e-18	4.12e-17	2.98986	2.26916	1.19667	1.1237	0.812614	0.103293	0.220211	0.4327	1.5474	0.10017	0.103274	2.63988	0.106495	0.101254
693	-0.474254	-0.589066	-0.197293	0.175485	-0.116345	-0.442976	-1.02344	-2.23823	-0.722618	-1.73892	-3.01507	-3.81226	-2.799	-3.66222	-4.54488	-5.33216	16.5081	99.922	1.88e-21	2.15e-19	3.00141	2.26701	0.661619	1.5662	0.10018	0.103293	0.101026	1.30584	1.59244	0.10017	0.103274	2.65336	0.106495	0.75284
694	0.222574	0.577958	0.460085	-0.262694	-0.148509	0.100576	0.238207	-0.0597532	0.254199	0.568343	0.608567	0.142091	0.944716	1.34087	1.43625	0.630886	15.3958	7.52063	1.34e-06	1.38e-06	2.82743	2.08246	0.101372	1.3406	0.10018	0.103293	0.101026	0.101889	0.100977	0.10017	0.103274	2.58271	0.106495	0.387767
695	-0.31179	-0.0757223	-0.0207311	-0.0788941	-0.262218	-0.339757	-0.418158	-1.70654	-0.509217	-1.06344	-2.35754	-3.00806	-1.53354	-2.38811	-3.37648	-3.96817	16.0421	45.3719	1.51e-16	5.82e-16	2.99134	2.24795	0.907044	1.32085	0.10018	0.103293	0.101026	1.20812	1.18732	0.10017	0.361243	2.64013	0.106495	0.860393
696	-0.745275	-0.973159	-0.413782	0.0147506	-0.48098	-0.777159	-1.4282	-2.57556	-1.0394	-2.24792	-3.45005	-4.1173	-3.52025	-4.05564	-5.28584	-5.61002	16.446	118.987	1.48e-22	4.75e-20	2.99239	2.27288	0.497793	0.772457	0.10018	0.103293	0.101026	1.27367	1.64524	0.10017	0.103274	2.65101	0.106495	0.101254
697	0.0713759	-0.452846	-0.235358	0.24974	0.237317	-0.291975	-1.16092	-1.78842	0.00720638	-1.53326	-2.55114	-2.99453	-1.93289	-3.0614	-3.33093	-3.8191	15.4168	55.7744	8.18e-18	6.09e-17	2.98214	2.19591	0.101372	1.6966	0.105185	0.103293	0.101026	1.23755	1.46007	0.10017	0.230795	2.63334	0.106495	0.913621
698	-0.154998	-0.586327	-0.393227	-0.0083497	0.0823967	-0.408644	-1.11973	-1.45416	-0.222552	-1.38771	-2.35914	-2.50923	-1.96122	-3.43986	-3.16687	-2.96627	13.4851	23.9212	6.39e-13	8.66e-13	2.95565	2.19364	0.101372	0.100986	0.10018	0.227894	0.101026	0.915133	1.46456	0.219699	0.103274	2.60377	0.50603	1.00838
699	-0.453771	-0.692678	-0.0600401	0.2835	-0.332427	-0.564286	-1.02571	-1.42266	-0.780584	-1.6153	-2.02247	-1.91734	-2.40543	-2.28924	-1.84439	-1.97961	15.8798	30.5145	2.49e-14	4.33e-14	2.97389	2.22381	0.101372	1.44617	0.10018	0.103293	0.101026	0.520292	1.49854	0.10017	0.103274	2.63592	0.106495	0.470656
700	-0.720112	-0.547933	-0.228278	0.0937189	-0.361673	-0.48647	-0.966428	-2.37357	-0.850954	-1.77346	-3.17818	-4.38897	-2.83392	-3.60879	-4.46678	-6.08266	14.9965	66.3084	6.94e-19	9.15e-18	2.99667	2.27514	1.0165	0.942713	0.10018	0.103293	0.756866	1.39699	1.60372	0.10017	0.103274	2.65781	0.106495	0.771448
701	-0.56908	0.179689	0.526612	0.16945	-0.162167	-0.00864513	0.404909	-0.972419	-0.633006	-0.622288	-1.17003	-2.50849	-2.16283	-2.62515	-3.4397	-4.55549	14.7165	26.1516	3.01e-13	4.33e-13	3.00857	2.25917	1.41492	1.32447	0.664044	0.103293	0.101026	1.22581	1.44426	0.10017	0.103274	2.65819	0.106495	1.17156
702	-0.101175	-0.608569	-0.49514	0.376132	0.238518	-0.353314	-1.58389	-2.36853	-0.126073	-2.06685	-3.20926	-3.60177	-2.8614	-3.88767	-4.67904	-5.8504	14.3135	56.3008	7.16e-18	5.61e-17	3.01076	2.29291	0.101372	1.75137	0.965912	0.103293	0.50281	1.27008	1.64648	0.10017	0.103274	2.65955	0.106495	0.870273
703	-0.590382	-0.417862	0.0774435	0.354397	-0.187803	-0.315103	-0.784748	-2.25997	-0.922644	-1.54944	-2.88264	-3.79908	-3.21807	-3.63044	-4.58122	-4.97138	15.4146	80.2896	3.51e-20	1.23e-18	3.00368	2.29638	0.928755	1.42202	0.61842	0.103293	0.101026	0.957428	1.65539	0.145195	0.103274	2.65728	0.106495	0.940494
705	0.500751	2.58052	1.89419	-0.280799	0.223475	2.87802	3.66576	5.44111	0.530664	4.17118	5.09087	5.24975	0.274602	1.60276	3.82781	4.27272	12.7827	29.9781	4.73e-14	7.72e-14	3.12342	2.23944	1.69959	1.49653	1.15122	0.103293	0.101026	1.28866	1.63254	0.427999	0.690011	2.64039	0.805186	3.31037
706	-0.812806	-0.579061	-0.0594011	-0.0463144	-0.536365	-0.571676	-0.649726	-2.17378	-1.14198	-1.71687	-2.8859	-3.96788	-3.01095	-3.27344	-4.9067	-5.89902	16.1485	76.1476	9.52e-20	2.43e-18	2.99614	2.26226	1.09321	0.897906	0.10018	0.103293	0.101026	1.24981	1.49625	0.10017	0.103274	2.65509	0.106495	0.101254
707	0.0333263	-0.505886	-0.6806	0.154799	0.387652	-0.381395	-1.67677	-2.27758	0.0571167	-2.2794	-2.94038	-4.36506	-2.7213	-3.88506	-5.52275	-6.60481	13.5957	44.3626	2.07e-16	7.41e-16	3.00411	2.3034	0.101372	1.41267	1.05805	0.103293	0.871769	1.3712	1.58865	0.10017	0.332327	2.66258	0.278676	0.498422
708	-0.261729	0.176694	0.368013	0.029559	0.0476411	-0.0301697	-0.130434	-1.5657	-0.32347	-0.820878	-2.0505	-3.49923	-1.55439	-2.67405	-3.92736	-6.06244	14.4394	39.9702	8.92e-16	2.39e-15	2.99711	2.25596	1.23781	1.41281	0.652951	0.103293	0.101026	1.37646	1.22893	0.345582	0.415201	2.65336	0.147074	0.101254
709	-0.354576	-0.748688	-0.321905	-0.066265	-0.287386	-0.712706	-1.27797	-1.83815	-0.62716	-1.80325	-2.5814	-2.71018	-2.25015	-2.69817	-2.75531	-3.01601	16.968	102.916	4.66e-22	8.91e-20	2.96892	2.21951	0.101372	1.00036	0.10018	0.103293	0.101026	1.15795	1.42692	0.10017	0.103274	2.63267	0.106495	0.101254
710	-0.387645	-0.724531	-0.356526	-0.114435	-0.34978	-0.742348	-1.18616	-1.73255	-0.721423	-1.74713	-2.35447	-2.41223	-2.188	-2.27615	-2.29574	-2.63795	16.7232	61.3789	9.5e-19	1.21e-17	2.9645	2.2293	0.101372	0.545765	0.10018	0.103293	0.101026	1.03006	1.37742	0.10017	0.103274	2.63266	0.106495	0.101254
711	-0.601626	-0.395341	-0.414256	0.129941	-0.100145	-0.214453	-0.766618	-2.30042	-0.734373	-1.59222	-2.87718	-3.73975	-2.82113	-3.41821	-4.35642	-6.83157	14.3727	46.4572	1.08e-16	4.46e-16	3.02319	2.31617	0.985011	1.89883	0.10018	0.103293	0.599552	1.41172	1.61774	0.10017	0.103274	2.67632	0.338538	0.697965
712	-0.906109	-0.345858	0.293808	0.0101623	-0.544715	-0.417336	-0.288145	-1.94793	-1.12325	-1.48774	-2.46514	-3.86265	-2.82075	-2.92587	-4.16031	-5.78545	14.9868	40.5588	7.27e-16	1.98e-15	3.00589	2.28592	1.36622	1.20504	0.10018	0.103293	0.282318	1.39919	1.49729	0.10017	0.103274	2.65603	0.106495	0.101254
713	-0.442011	-0.644027	-0.606184	0.0440977	-0.256863	-0.286582	-1.33983	-2.30949	-0.544725	-1.80942	-3.69377	-4.4211	-2.39583	-3.88434	-4.49269	-5.86041	13.9025	46.9948	6e-17	2.82e-16	2.98584	2.25904	0.630349	0.100986	0.10018	0.170987	0.752415	1.3284	1.62575	0.10017	0.541021	2.65334	0.106495	1.07014
714	-0.682028	-0.468167	0.0518236	0.000659614	-0.457085	-0.466629	-0.59873	-2.09971	-0.978631	-1.62274	-2.73495	-4.03598	-2.73779	-3.25974	-4.71304	-5.87817	15.7397	75.9911	9.81e-20	2.48e-18	2.99833	2.27214	1.08773	0.100986	0.555544	0.103293	0.101026	1.22914	1.48046	0.10017	0.103274	2.65184	0.106495	0.101254
715	-0.600446	-0.242559	0.405874	0.306183	-0.0435426	-0.231299	-0.329476	-1.99588	-0.877451	-1.2818	-2.41918	-3.65762	-2.91765	-3.19489	-3.8624	-5.82128	14.4337	44.589	1.93e-16	7.06e-16	3.00559	2.26457	1.24909	1.50086	0.10018	0.103293	0.101026	1.23448	1.5861	0.787729	0.103274	2.65944	0.106495	0.101254
716	-0.373867	-0.932531	-0.41269	-0.0756348	-0.26687	-0.748511	-1.3475	-1.91911	-0.68285	-2.04604	-2.66821	-3.07891	-2.64028	-3.30012	-3.26204	-3.25833	14.6734	43.6461	1.33e-16	5.22e-16	2.96258	2.20218	0.101372	0.100986	0.10018	0.279189	0.101026	1.18133	1.48989	0.10017	0.103274	2.61789	0.106495	0.101254
717	-0.148383	-0.492183	-0.254282	0.17013	0.0954029	-0.318795	-1.06084	-2.14351	-0.236229	-1.56754	-2.86938	-3.80643	-2.27436	-3.45547	-4.42271	-5.16171	16.2664	82.004	3.28e-20	1.2e-18	2.98901	2.23823	0.293278	1.37482	0.594885	0.103293	0.101026	1.33189	1.52728	0.10017	0.103274	2.6385	0.106495	0.966926
718	-0.282261	-0.649794	-0.136704	0.13969	-0.0182909	-0.485042	-1.07512	-2.20527	-0.49292	-1.8592	-2.90053	-3.50133	-2.64258	-3.54877	-4.12519	-4.46097	16.3509	138.655	5.46e-24	5.78e-21	2.98794	2.23416	0.491541	1.40757	0.633514	0.103293	0.101026	1.25555	1.56962	0.10017	0.103274	2.63612	0.106495	0.101254
719	-0.557847	-0.504439	-0.0372206	-0.0691133	-0.477345	-0.5787	-0.743046	-2.13988	-0.843399	-1.63957	-2.86758	-4.1361	-2.54153	-3.03902	-4.59283	-5.27398	15.3714	67.1197	5.83e-19	8.04e-18	2.97782	2.23082	0.999172	0.100986	0.10018	0.103293	0.101026	1.33889	1.42906	0.424937	0.103274	2.62782	0.106495	0.443812
720	3.14103	2.1308	0.527034	-5.49218	1.60512	2.46439	2.75852	2.62317	3.12632	4.04334	3.38186	1.6878	5.43403	5.32267	3.72174	1.37847	12.4101	33.7633	2.13e-14	3.77e-14	3.05921	2.23187	0.101372	1.78752	0.10018	0.412252	0.101026	1.15031	0.100977	0.612384	1.84139	2.67603	0.106495	3.09367
721	0.064287	0.255582	0.326308	-0.476301	-0.301126	-0.223524	-0.0684514	-0.284701	-0.0689805	0.423985	0.566764	0.140623	0.87404	1.48666	1.50588	0.66994	15.7132	10.2935	4.04e-08	4.29e-08	2.80444	2.06241	0.101372	0.100986	0.10018	0.103293	0.101026	0.101889	0.100977	0.10017	0.103274	2.55788	0.106495	0.101254
722	2.7534	2.04346	0.729057	-0.979483	1.88016	2.0808	2.91183	0.866497	3.08771	3.57492	3.05713	0.684215	4.50078	4.12893	3.27297	1.14001	12.4828	25.9154	3.41e-13	4.85e-13	3.04143	2.24352	1.42514	0.100986	0.931288	0.819594	0.101026	1.41879	1.34213	0.10017	1.96717	2.66631	0.106495	3.07551
723	0.206561	0.572163	0.502315	-0.151704	-0.0744389	0.0253395	0.165206	0.0322246	0.179268	0.558963	0.686261	0.407261	0.97178	1.49222	1.60216	0.863755	16.0289	8.72093	2.67e-07	2.79e-07	2.81613	2.0805	0.101372	1.31155	0.10018	0.103293	0.101026	0.101889	0.100977	0.10017	0.103274	2.57587	0.106495	0.101254
724	3.15639	2.96877	1.67681	-3.78155	2.17172	2.91024	3.3127	3.28608	3.61665	4.64383	4.24818	2.26914	6.1544	5.85678	4.4595	2.39766	13.6204	33.9772	8.49e-15	1.7e-14	3.04402	2.22574	0.901259	1.1943	0.80885	0.848814	0.677656	1.44145	0.28001	0.10017	1.7695	2.6627	0.106495	3.14975
725	0.0178902	0.159123	-0.208597	-0.718981	-0.315859	-0.425108	-0.727635	-1.17676	-0.0527729	-0.523511	-1.0756	-1.23286	-0.111737	-0.400026	-0.505595	-1.13193	15.1416	6.11819	1.13e-05	1.15e-05	2.93013	2.20632	0.101372	1.47287	0.10018	0.103293	0.101026	0.987797	0.100977	0.10017	0.103274	2.62612	0.106495	0.101254
726	3.23999	2.77258	2.33212	-2.66074	2.30775	3.06247	4.129	2.68881	3.92125	4.70616	4.7323	1.47014	6.06445	6.16415	4.63634	1.52403	13.4919	46.0746	1.22e-16	4.94e-16	3.05582	2.22645	1.43001	1.32089	0.10018	0.930484	0.101026	1.46709	0.901692	0.10017	2.02834	2.68633	0.106495	3.17116
727	3.72813	2.29985	1.17385	-1.89996	2.72831	2.77681	3.46099	1.97901	3.96458	4.174	3.64312	0.314789	6.43174	5.76769	3.873	1.28268	13.0528	51.4214	2.59e-17	1.47e-16	3.03982	2.21495	0.516129	0.37528	0.10018	0.103293	0.935108	1.27301	0.853845	0.10017	2.05495	2.6781	0.622289	3.1317
728	0.0833294	-0.027403	-0.469049	-1.27369	-0.345077	-0.728332	-0.983329	-1.46644	-0.00831406	-1.02421	-2.14628	-2.20422	-0.390184	-1.55816	-1.69408	-2.47234	13.847	13.5983	1.3e-09	1.42e-09	2.96135	2.20727	0.101372	1.50818	0.10018	0.103293	0.139426	1.32218	0.100977	0.10017	0.103274	2.62597	0.106495	0.101254
729	1.31401	2.67668	1.53509	-1.29406	0.360857	2.55468	3.64394	4.73884	1.41871	4.35832	4.69354	4.2912	2.4203	3.25608	3.70808	3.61681	14.8855	30.1634	4.35e-14	7.17e-14	3.10109	2.26177	1.5197	1.4272	0.598349	0.103293	0.101026	1.42167	1.40722	0.367074	0.899912	2.66349	0.106495	3.24759
730	2.51269	1.35366	-0.259143	-0.911104	1.7047	1.946	1.2474	0.240324	2.77919	2.36988	0.812353	-1.0055	3.1255	2.36445	0.0455544	-2.13992	13.5105	34.6666	4.44e-15	9.56e-15	3.0294	2.25515	0.101372	1.51434	0.10018	0.103293	0.101026	1.3699	1.49236	0.10017	1.75705	2.67468	0.106495	2.80157
731	3.96548	1.91845	1.01809	-2.88457	2.47567	2.51072	2.78519	1.82974	3.79757	3.72996	3.30307	0.637567	6.28508	5.66463	3.32449	0.728158	12.4719	34.1544	7.9e-15	1.6e-14	3.01197	2.15927	0.101372	0.100986	0.506065	0.536908	0.101026	1.33035	0.100977	0.609423	1.97112	2.63662	0.106495	3.05406
732	3.91609	3.48404	2.67358	-1.75403	2.74462	4.09738	4.50767	3.50599	4.54815	5.33789	5.68892	2.57439	6.32926	6.5327	6.6706	3.98673	12.522	24.4523	7.43e-13	9.96e-13	3.08983	2.27514	1.54276	1.79709	1.0712	0.103293	1.00902	1.49891	0.680802	0.10017	1.96946	2.71358	0.293312	3.21489
734	2.17125	3.56585	1.30604	-1.50482	1.6368	3.00017	3.47515	4.81995	2.47303	5.00863	3.72641	4.29037	3.59466	4.00592	3.32748	3.52491	12.2512	16.8904	9.44e-11	1.07e-10	3.06123	2.21139	0.101372	0.314806	0.10018	0.754836	0.101026	1.31057	1.45123	0.690504	0.727916	2.63338	0.106495	3.20036
735	3.73937	2.43439	1.55909	-3.24217	2.53932	2.92916	3.52284	2.38137	4.00105	4.59098	4.01321	1.04983	6.30027	5.9625	3.22889	-0.163045	13.8863	48.5368	5.85e-17	2.79e-16	3.03105	2.22117	0.916716	1.02897	0.10018	0.494406	0.101026	1.37351	0.100977	0.10017	1.96786	2.67023	0.106495	3.06307
736	-0.0176904	0.0520821	0.365958	0.174179	0.00390158	-0.0330759	-0.196882	-1.60957	-0.352588	-0.819855	-2.14921	-2.61347	-1.47534	-2.53595	-2.88923	-3.80171	13.7595	32.079	1.05e-14	2.04e-14	2.99062	2.25293	1.01912	1.0279	0.866517	0.103293	0.101026	0.702723	1.29122	0.716564	0.103274	2.63679	0.106495	1.06559
737	0.215653	0.464371	0.350584	0.0474416	0.0128606	0.0169871	-0.0292858	-0.139759	0.237852	0.389418	0.266169	0.00850726	0.679464	1.01157	1.09014	0.539533	15.5114	4.73892	0.000125608	0.000127618	2.84137	2.10936	0.101372	1.50884	0.10018	0.103293	0.101026	0.101889	0.100977	0.10017	0.103274	2.59342	0.106495	0.799877
738	3.24933	2.18353	1.0598	-1.82478	2.30857	2.90398	3.28362	1.51461	3.5231	4.03663	3.36616	0.28359	4.98595	4.56226	3.00442	-0.481854	13.5151	48.2106	3.25e-17	1.74e-16	3.04644	2.24267	1.26503	0.796638	0.10018	0.103293	0.516631	1.44394	1.3455	0.130936	2.06657	2.70216	0.760065	3.12879
739	3.12039	1.85058	0.646355	-2.57985	2.08267	2.74437	2.92926	1.55919	3.35826	3.67934	2.88271	0.13004	5.44929	4.88084	3.53276	0.794973	13.6784	66.5364	2.92e-19	4.83e-18	3.04311	2.22743	0.922736	0.100986	0.10018	0.103293	0.792044	1.4019	1.23137	0.489946	2.02703	2.67707	0.106495	3.1318
740	-0.615891	-0.825125	-0.556054	-0.156446	-0.467587	-0.724545	-1.33035	-2.31996	-0.847835	-2.02221	-3.31295	-3.93547	-2.90061	-3.65745	-5.009	-5.16239	16.2354	90.9586	7.33e-21	5.09e-19	2.98168	2.25012	0.322339	0.100986	0.10018	0.103293	0.101026	1.29012	1.51631	0.10017	0.103274	2.64055	0.106495	0.421789
741	4.23335	3.57598	3.5094	-4.08913	2.97683	4.08611	4.77706	3.03515	4.76817	5.7463	5.97805	2.1233	7.63841	7.7758	6.31904	2.51776	13.1142	41.0932	1.52e-15	3.82e-15	3.05396	2.20867	1.4158	1.03104	0.576067	0.991269	0.873181	1.42254	0.100977	0.10017	2.03063	2.67531	0.106495	3.18071
742	0.258212	-0.0243862	-0.470542	-0.187818	0.266867	0.0277071	-0.876468	-1.68806	0.341035	-1.28598	-2.60946	-3.67333	-1.37779	-2.80291	-4.21155	-5.05762	14.3614	41.2951	5.66e-16	1.63e-15	2.99227	2.26013	0.101372	1.17159	0.805742	0.288841	0.101026	1.35065	1.31448	0.10017	0.103274	2.63881	0.106495	1.20766
743	0.639835	0.769674	-0.050574	-0.1315	0.269416	0.170187	0.101078	0.194467	0.762993	0.610577	0.4396	0.587781	1.29662	1.38564	1.26232	1.28259	13.4935	5.51135	2.75e-05	2.81e-05	2.8418	2.08206	0.101372	1.5234	0.10018	0.103293	0.101026	0.101889	0.100977	0.10017	0.645718	2.59299	0.106495	0.99248
744	0.173908	0.347605	0.324276	-0.363121	-0.168105	-0.158949	-0.0532643	-0.128312	0.143258	0.500619	0.594191	0.27163	1.02209	1.48647	1.49928	0.859093	16.4203	10.8934	2.08e-08	2.22e-08	2.80394	2.05055	0.101372	0.70563	0.10018	0.103293	0.101026	0.101889	0.100977	0.10017	0.103274	2.56234	0.106495	0.206386
745	3.21835	0.971944	0.420091	-3.06284	2.2811	1.76277	1.95462	0.529765	3.42648	2.60952	1.94182	-1.27276	5.21865	4.2229	1.74787	-0.65551	12.9753	35.8437	4.05e-15	9.1e-15	3.01512	2.1965	0.101372	1.0822	0.10018	0.678322	0.674562	1.13549	1.26049	0.10017	1.99559	2.65549	0.106495	2.98636
747	2.98759	1.91582	0.607747	-2.80256	2.01215	2.45097	2.19586	1.34403	3.51074	3.61859	2.19289	0.000509776	4.63256	3.95337	2.235	0.14487	13.6155	50.6226	1.56e-17	1e-16	3.03929	2.24617	0.768902	1.07178	0.329413	0.103293	0.101026	1.47371	1.36831	0.906064	1.99118	2.69003	0.106495	3.10345
748	-0.199578	-0.61328	-0.494248	0.0558284	-0.170511	-0.571422	-1.24192	-1.90904	-0.385073	-1.67247	-2.93796	-3.40641	-2.19115	-3.20866	-3.51353	-3.69147	15.4208	57.2828	3.97e-18	3.52e-17	2.98091	2.23319	0.101372	1.02487	0.10018	0.103293	0.637701	1.09289	1.46242	0.10017	0.103274	2.636	0.106495	1.02751
749	0.195445	0.249187	0.375029	-0.501814	-0.223834	-0.267888	-0.102138	-0.262643	0.0761927	0.506633	0.615669	0.218154	1.02762	1.56119	1.48809	0.622322	15.2908	9.97689	5.81e-08	6.14e-08	2.80419	2.02836	0.101372	0.100986	0.10018	0.103293	0.101026	0.101889	0.100977	0.10017	0.103274	2.56239	0.106495	0.101254
751	3.00281	2.17515	0.685699	-2.59116	1.77093	2.5748	2.80711	1.80772	3.31827	3.98655	3.04744	0.830064	5.15232	4.7154	2.9618	0.681785	14.5445	50.0452	3.8e-17	1.98e-16	3.0517	2.24162	0.849993	1.28243	0.10018	0.601074	0.101026	1.3864	1.2719	0.10017	1.98047	2.69063	0.318804	3.15109
752	3.18334	1.63051	0.279261	-4.15282	2.48783	2.27762	2.54763	1.11898	3.57358	3.06929	2.33448	-0.450217	5.69493	4.79945	3.38605	1.00028	13.163	58.3002	2.16e-18	2.18e-17	3.03169	2.21274	0.101372	0.408086	0.10018	0.302311	0.996269	1.43733	1.36992	0.10017	2.02186	2.66878	0.106495	3.12899
753	3.2726	2.25982	1.39173	-1.22108	2.19651	2.94545	3.54721	2.07814	3.19617	4.2593	3.68727	1.9717	5.12579	4.87546	4.14698	2.80218	12.8109	29.5065	4.18e-14	6.92e-14	3.06413	2.22482	1.16537	1.24798	0.679466	0.103293	0.101026	0.733021	1.43665	0.10017	1.98737	2.66697	0.106495	3.14466
754	0.149537	-0.00788635	-0.7201	-0.897223	-0.224494	-0.488156	-0.994749	-1.45063	0.103049	-0.754861	-1.79143	-2.24035	-0.285652	-1.19059	-2.03767	-2.43595	14.0528	13.3117	1.87e-09	2.04e-09	2.95405	2.2174	0.101372	0.100986	0.10018	0.103293	0.101026	1.26142	0.100977	0.10017	0.395625	2.61534	0.106495	1.01169
755	-0.430475	0.21507	0.202398	-0.63865	-0.592881	-0.161781	0.0919858	-0.864813	-0.621374	-0.663075	-2.03297	-2.68541	-0.759083	-2.02845	-2.98843	-5.30848	12.2646	21.4655	2.66e-12	3.31e-12	3.00666	2.2965	1.35252	1.08148	0.141262	0.103293	0.101026	1.32218	0.541993	0.889899	0.277268	2.64916	0.106495	0.19725
756	2.65299	2.74493	2.64584	-0.904146	2.2743	3.01613	4.86855	3.1781	3.32518	5.21717	5.62054	2.32308	5.66491	7.02613	5.62199	1.83488	12.7313	38.668	1.42e-15	3.58e-15	3.08527	2.24739	1.78393	1.05257	0.10018	0.103293	0.359341	1.4869	0.100977	0.10017	2.00233	2.7143	0.106495	3.18365
757	3.29108	1.24918	0.259814	-1.84296	2.00573	2.28455	2.22446	0.837766	3.66348	3.52192	2.68759	-0.315607	5.21979	4.75305	2.84091	-0.572883	12.4562	38.5066	1.5e-15	3.79e-15	3.04717	2.23408	0.15857	1.78673	0.10018	0.103293	0.225686	1.41152	0.100977	0.10017	2.00264	2.68689	0.429797	3.02404
758	1.59743	2.08679	0.958924	-1.0774	0.535981	2.18748	3.00589	2.70852	1.99368	3.41959	3.31482	1.74078	2.54856	3.09513	2.14795	0.24917	13.9519	21.4881	4.14e-12	5.08e-12	3.03828	2.22357	1.5347	1.15802	0.10018	0.103293	0.101026	1.36311	1.30151	0.10017	1.33144	2.66101	0.441039	2.9778
760	-0.480131	-0.838289	-0.72791	0.00810463	0.0135555	-0.633656	-1.78774	-2.50637	-0.564928	-2.23398	-3.82074	-5.15909	-2.95294	-4.63898	-5.84986	-6.28289	13.6372	61.3549	9.56e-19	1.21e-17	2.99798	2.28367	0.126194	1.2673	0.10018	0.103293	0.101026	1.38478	1.66518	0.10017	0.953073	2.656	0.106495	0.101254
761	0.0991639	-0.076382	-0.42963	-0.84182	-0.245275	-0.447399	-0.842905	-1.48449	0.00541205	-0.746925	-1.62873	-1.99554	-0.317889	-0.975226	-1.50902	-2.06299	15.2221	12.3626	4.6e-09	4.97e-09	2.94244	2.18727	0.101372	0.174919	0.134598	0.103293	0.101026	1.19022	0.220059	0.10017	0.103274	2.601	0.106495	0.846816
762	2.89608	2.76379	2.29151	-1.48182	2.22999	2.85498	4.04638	2.475	3.55646	4.74308	4.91949	1.31837	6.20345	6.277	5.06214	1.64761	13.8559	44.8814	1.76e-16	6.62e-16	3.0639	2.21606	1.42433	1.13346	0.10018	0.930484	0.777448	1.34822	0.869946	0.445201	2.02016	2.68831	0.106495	3.19264
763	1.92348	1.59959	-0.296957	-2.3369	0.869602	1.85198	1.82247	2.30823	2.1117	3.09669	1.67466	1.56113	2.84504	2.53163	1.19696	1.03243	14.0785	20.1515	9.62e-12	1.14e-11	3.03772	2.23819	0.101372	0.591014	0.665741	0.103293	0.101026	1.37522	1.35409	0.10017	1.21025	2.65282	0.106495	3.00252
764	3.12412	2.00357	0.83508	-2.44215	1.46809	2.74858	2.83028	2.50204	3.61656	4.17116	3.61868	2.6192	5.4956	5.29362	4.23935	2.26137	12.6822	32.8659	1.34e-14	2.51e-14	3.05845	2.18859	0.101372	1.77658	0.555122	0.103293	0.101026	1.33254	0.121246	0.366606	1.87036	2.66172	0.653308	3.13093
765	2.84145	2.20484	1.78544	-2.18777	2.26717	2.77875	3.66738	2.48022	3.34464	4.49944	4.65265	0.834023	5.58387	5.88197	4.87407	1.60689	12.7533	35.7844	4.15e-15	9.22e-15	3.0519	2.17575	1.44617	0.916642	0.333002	0.103293	0.573113	1.11393	0.701196	0.974667	1.98618	2.67239	0.106495	3.1316
766	2.89735	2.14018	0.836718	-1.383	1.94142	2.74722	3.45875	1.78051	3.38405	4.02792	3.86355	1.30423	5.92647	5.60424	4.38444	1.26021	12.298	36.5412	3.1e-15	7.27e-15	3.03246	2.1767	1.22426	0.100986	0.460223	0.848057	1.03628	1.24908	0.739799	0.10017	1.9459	2.6542	0.730976	3.13665
768	-0.118708	0.20162	-0.255961	-0.926813	-0.436107	-0.464957	-0.556424	-1.41808	-0.205341	-0.765012	-2.17019	-2.37017	-0.608935	-1.56958	-2.32453	-2.92005	14.2605	19.8027	8.6e-12	1.03e-11	2.98643	2.26854	0.400263	1.58791	0.10018	0.103293	0.101026	1.34626	0.194069	0.10017	0.103274	2.64512	0.106495	0.348296
769	0.0270728	0.569356	0.488328	-0.179597	-0.323669	-0.0326945	0.202931	-0.132637	-0.0464065	0.445019	0.432833	0.0447665	0.712646	1.14545	1.17971	0.364675	15.411	5.34066	4.2e-05	4.29e-05	2.85333	2.12905	0.101372	1.48278	0.10018	0.103293	0.101026	0.101889	0.100977	0.10017	0.103274	2.60865	0.106495	0.101254
770	0.737611	0.712431	0.203273	-0.0698251	0.312185	0.249177	-0.0470076	-0.00562661	0.809884	0.510038	0.193145	-0.0634995	1.03187	1.07911	0.805068	0.643064	13.3437	3.1316	0.00329574	0.00330928	2.86377	2.09689	0.101372	1.24236	0.10018	0.103293	0.101026	0.101889	0.100977	0.350333	0.441298	2.60075	0.106495	1.20269
771	2.74516	2.59344	1.48813	-1.36449	2.21914	3.12205	3.95614	1.96061	3.38595	4.0975	4.38953	0.671149	5.41564	5.59542	4.9509	1.54445	12.3284	31.8358	2.08e-14	3.72e-14	3.06592	2.27525	1.61828	0.753957	0.51865	0.589269	1.22609	1.5058	1.22667	0.10017	2.01876	2.70597	0.583945	3.18423
772	-0.160239	0.388771	0.294017	0.151707	0.293785	0.193321	0.11117	-1.12385	0.0993835	-0.544875	-1.6436	-2.69551	-1.3084	-2.44379	-3.89252	-5.01619	13.8632	24.5173	7.17e-13	9.65e-13	3.00507	2.25148	1.19306	1.46899	0.83796	0.103293	0.101026	1.32782	1.24245	0.10017	0.103274	2.65087	0.75166	1.02788
773	-0.367538	-0.103047	0.0748077	-0.268374	-0.494141	-0.467686	-0.402706	-1.44891	-0.720805	-0.909968	-1.67729	-2.00979	-1.10357	-1.17138	-1.41305	-2.00315	16.1499	20.7782	4.48e-12	5.48e-12	2.95405	2.22672	0.758633	1.19608	0.10018	0.103293	0.101026	1.02816	0.901377	0.10017	0.103274	2.61765	0.106495	0.101254
774	1.75158	2.8128	0.244526	-1.2115	1.16406	2.83003	2.66182	3.90791	2.28175	4.20678	2.94391	3.47204	2.27215	2.16544	2.27553	3.0827	13.5426	15.0167	4.18e-10	4.66e-10	3.0794	2.25023	0.119719	1.42908	0.972934	0.355103	0.101026	1.4414	1.54782	0.10017	0.797967	2.66014	0.337566	3.19147
775	-0.303269	-0.606052	-0.606198	-0.445791	-0.439007	-0.912524	-1.38139	-2.04407	-0.611634	-1.82319	-2.92255	-3.1086	-1.62338	-2.64387	-3.65459	-4.10147	15.5339	51.5583	1.44e-17	9.54e-17	2.98026	2.26237	0.101372	0.846511	0.10018	0.103293	0.230168	1.34082	1.13912	0.10017	0.103274	2.65028	0.106495	0.101254
776	-0.513686	-1.06922	-0.734329	0.0242525	-0.390744	-0.904565	-1.62215	-2.21187	-0.813629	-2.41875	-3.50168	-3.57093	-2.85855	-3.8616	-4.80628	-4.96024	14.2999	46.6737	1.02e-16	4.19e-16	2.98208	2.23266	0.101372	0.100986	0.10018	0.103293	0.737253	1.13554	1.59531	0.10017	0.480644	2.64292	0.106495	0.101254
778	2.87491	2.04025	1.06202	-3.16956	1.59874	2.64073	3.20788	2.17078	2.96799	3.90303	3.74474	1.57155	4.79507	4.75382	4.63371	2.78138	13.1388	39.9068	4.77e-16	1.42e-15	3.06551	2.22609	1.41623	0.100986	1.01896	0.103293	0.947821	1.36892	1.32212	0.10017	1.95383	2.68261	0.106495	3.1916
779	-0.724884	-0.248788	-0.068242	0.206268	-0.0841857	-0.0498995	-0.276064	-1.68447	-0.655906	-1.03208	-2.25081	-3.732	-2.89973	-3.19075	-4.74388	-5.6597	14.5894	43.8516	2.44e-16	8.32e-16	3.00486	2.2483	1.11384	1.21589	0.10018	0.103293	0.101026	1.25225	1.61217	0.10017	0.103274	2.6569	0.570314	1.18729
780	3.53764	3.33649	2.32626	-1.22032	2.17298	3.39534	4.0771	3.66324	4.00959	4.81166	5.21639	4.28169	5.55343	5.20897	6.57653	5.89442	12.5345	25.2146	4.92e-13	6.82e-13	3.12491	2.24371	1.34726	2.05337	1.12201	0.827331	0.891085	1.46558	1.51974	0.10017	1.86063	2.6807	0.106495	3.30632
781	0.119735	0.668906	0.276987	0.243673	0.543033	0.632895	0.239508	-1.03619	0.325866	-0.256313	-1.32173	-3.09378	-1.0389	-2.42226	-3.72068	-4.52417	12.896	20.1713	9.5e-12	1.13e-11	3.00569	2.27973	1.17338	1.33603	0.959603	0.646797	0.101026	1.35139	1.42859	0.10017	0.103274	2.65416	0.750975	1.19621
782	3.15199	2.43655	2.07584	-1.37124	1.75715	2.84284	4.0091	3.66697	3.11694	4.84468	5.07149	3.02373	5.80012	6.26178	4.94932	2.32953	14.1094	42.8715	3.35e-16	1.09e-15	3.05617	2.19511	1.30585	1.48298	0.10018	0.179436	0.101026	1.12298	0.100977	0.10017	1.82752	2.66699	0.106495	3.12516
783	-0.256777	-0.699469	-0.51963	-0.206846	-0.304343	-0.723179	-1.40428	-2.05849	-0.53279	-1.77549	-2.8633	-3.38735	-1.9734	-2.73968	-3.85328	-4.00737	16.0671	65.8219	4.07e-19	6.01e-18	2.97038	2.22448	0.101372	0.100986	0.10018	0.103293	0.101026	1.31732	1.35514	0.10017	0.103274	2.6337	0.106495	0.712092
784	-0.350937	-0.0645001	0.307475	0.330929	0.0766276	-0.00764119	-0.349261	-1.94788	-0.454313	-1.21265	-2.28083	-3.50564	-2.53586	-3.06525	-3.98883	-5.78698	15.1507	54.9	1.02e-17	7.37e-17	3.01261	2.27711	1.14984	1.73928	0.68964	0.103293	0.238615	1.2631	1.5972	0.10017	0.103274	2.65765	0.106495	0.794165
785	-0.180737	0.110832	0.247449	-0.0780584	-0.331	-0.084882	0.290957	-0.982984	-0.341312	-0.489025	-1.51074	-2.71954	-1.24524	-1.84774	-2.88794	-4.01224	14.6491	20.5173	7.6e-12	9.11e-12	2.98775	2.21704	1.18193	0.591605	0.10018	0.103293	0.101026	1.28715	1.1226	0.10017	0.103274	2.63483	0.106495	1.20887
786	-0.535594	-0.406723	0.0334217	0.113942	-0.292086	-0.425104	-0.698864	-2.0856	-0.870531	-1.59395	-2.77267	-3.26955	-2.55707	-3.1345	-3.93757	-4.22082	16.0389	74.5049	7.11e-20	2.07e-18	2.98673	2.23906	0.909854	1.03638	0.10018	0.103293	0.169404	0.999326	1.48962	0.264153	0.103274	2.63509	0.106495	0.837174
787	0.178271	0.408844	-0.0333302	-0.640348	-0.099154	-0.142762	-0.277504	-0.669632	0.177974	-0.0120332	-0.441493	-0.667458	0.485897	0.467407	0.132967	-0.409951	15.7593	4.21242	0.000348316	0.000351388	2.8835	2.14101	0.101372	1.10714	0.10018	0.103293	0.101026	0.593244	0.100977	0.10017	0.103274	2.60416	0.106495	0.806068
788	-0.681467	-0.32433	-0.271517	0.129187	-0.0633227	-0.267144	-0.783595	-2.2557	-0.749775	-1.39561	-2.85049	-4.11697	-2.88813	-3.89563	-4.90712	-6.43444	14.5941	44.1189	2.24e-16	7.85e-16	3.01137	2.31589	1.02229	1.71051	0.10018	0.103293	0.101026	1.40632	1.59551	0.10017	0.427197	2.66937	0.695751	0.542889
789	-0.421137	-0.631436	-0.265872	0.0690481	-0.127592	-0.536223	-1.11302	-2.22275	-0.630654	-1.78217	-3.07896	-3.8928	-2.61322	-3.61138	-4.6063	-5.18556	16.788	114.854	2.48e-22	6.6e-20	2.99349	2.258	0.497408	1.32692	0.10018	0.103293	0.101026	1.33181	1.5317	0.10017	0.103274	2.64482	0.106495	0.538738
790	3.76163	2.55962	1.30651	-1.15649	2.82063	3.32487	3.22904	1.51614	4.26093	3.98536	3.34311	-0.0693455	5.80574	4.91844	4.18634	1.51068	13.3053	41.7782	4.81e-16	1.42e-15	3.03584	2.20831	1.13001	1.27438	0.82854	0.785195	0.978129	1.40708	1.37518	0.10017	2.02421	2.68225	0.106495	3.11116
791	0.0676978	0.198622	-0.199369	-0.891266	-0.264405	-0.405226	-0.516396	-1.2797	-0.0781739	-0.684462	-1.63396	-1.85636	-0.344831	-0.867922	-1.35374	-2.12703	14.6072	11.2456	1.43e-08	1.53e-08	2.95469	2.23493	0.101372	1.24401	0.10018	0.212204	0.101026	1.13072	0.100977	0.10017	0.103274	2.63336	0.106495	0.52245
793	-0.321131	-0.463801	-0.143366	0.185949	-0.144446	-0.505464	-1.02477	-1.72521	-0.569531	-1.54339	-2.41626	-2.53871	-2.18277	-2.69991	-2.5615	-2.9965	16.2675	75.2355	4.8e-20	1.58e-18	2.98488	2.25697	0.101372	1.69263	0.10018	0.103293	0.101026	1.1059	1.43731	0.10017	0.103274	2.64548	0.106495	0.582254
794	-0.32677	-0.516449	-0.0285218	0.133103	0.0803051	-0.382457	-1.03749	-2.31235	-0.386831	-1.76548	-2.93291	-4.20334	-2.57549	-3.49878	-4.59639	-6.46544	15.1022	80.1066	2.68e-20	1.05e-18	2.99485	2.27211	0.828709	1.10312	0.856206	0.45142	0.101026	1.3856	1.56977	0.10017	0.103274	2.64696	0.106495	0.101254
795	0.746274	2.54	1.96651	-0.918564	-0.231584	2.43707	4.20967	5.27096	0.977412	4.28575	5.25744	4.97306	1.01751	2.99734	3.51169	3.91018	14.8046	43.7518	2.52e-16	8.42e-16	3.09308	2.22962	1.4544	1.3615	0.10018	0.103293	0.101026	1.1936	0.913735	0.10017	0.103274	2.62799	0.106495	3.16289
796	-0.286887	-0.613976	-0.385213	-0.0347464	-0.0828832	-0.604002	-1.28322	-1.96535	-0.487581	-1.83876	-3.00717	-3.37097	-2.34855	-3.55721	-4.20549	-4.58482	16.1579	88.0495	5.57e-21	4.19e-19	2.9887	2.2498	0.101372	1.38102	0.10018	0.103293	0.101026	1.29794	1.45171	0.10017	0.103274	2.6485	0.106495	0.101254
797	-0.10492	-0.0151862	-0.0132296	-0.133119	-0.192065	-0.256835	-0.324547	-0.778668	-0.261738	-0.271146	-0.797004	-1.00065	-0.0394395	0.050596	-0.276975	-0.565863	15.1713	2.55456	0.0130721	0.0130922	2.90272	2.13804	0.101372	0.100986	0.10018	0.103293	0.101026	0.101889	0.650397	0.10017	0.103274	2.59693	0.106495	1.06997
798	0.0500313	-0.426132	-0.287289	0.283521	0.374197	-0.232238	-1.62884	-1.92385	0.00711668	-1.80126	-2.33596	-3.67711	-1.81311	-3.51185	-3.31075	-4.03424	12.4955	29.8469	2.88e-14	4.94e-14	2.97551	2.18988	0.101372	1.60543	0.10018	0.53122	0.101026	1.09224	1.50564	0.747086	0.858278	2.62651	0.106495	0.101254
799	0.228789	0.0655923	-0.31124	-0.527703	0.0410678	-0.512057	-1.01438	-1.43526	0.118242	-0.960239	-2.20373	-2.48838	-0.669392	-1.77788	-2.24053	-2.75242	14.564	21.3772	4.43e-12	5.42e-12	2.96841	2.23689	0.101372	1.42358	0.10018	0.103293	0.101026	1.28336	0.716503	0.130662	0.103274	2.62289	0.106495	0.827541
800	-0.461838	-0.646158	-0.257515	-0.0411597	-0.309234	-0.615706	-1.0481	-2.11286	-0.716244	-1.72462	-3.00577	-3.73271	-2.46648	-3.28121	-4.49407	-4.75419	17.0191	114.461	2.61e-22	6.71e-20	2.98558	2.24355	0.559396	0.800613	0.10018	0.103293	0.101026	1.30756	1.46718	0.10017	0.103274	2.63869	0.106495	0.690928
801	-0.222974	-0.419981	-0.421485	0.291633	0.117388	-0.233829	-1.12614	-1.87046	-0.353669	-1.59573	-2.83104	-3.44606	-2.44325	-3.31722	-3.71011	-4.64227	15.0597	61.1492	1.57e-18	1.78e-17	2.99733	2.26534	0.101372	1.71063	0.10018	0.103293	0.101026	1.152	1.55084	0.10017	0.103274	2.64606	0.321421	1.04063
802	-0.48061	-0.808034	-0.0950292	0.156384	-0.428655	-0.668463	-0.905706	-1.21057	-0.855144	-1.48942	-1.66754	-1.58166	-1.9783	-1.61074	-1.26645	-1.34657	15.8614	14.7301	5.32e-10	5.92e-10	2.93831	2.18042	0.101372	0.254407	0.10018	0.103293	0.101026	0.329647	1.39545	0.10017	0.103274	2.61681	0.106495	0.153389
803	0.0624985	0.223688	0.24121	-0.436186	-0.341903	-0.251548	-0.170714	-0.295321	-0.0833747	0.32621	0.424875	0.0837447	0.8362	1.34399	1.30357	0.555922	16.1882	9.03748	1.79e-07	1.88e-07	2.81508	2.06597	0.101372	0.391062	0.10018	0.103293	0.101026	0.101889	0.100977	0.10017	0.103274	2.57498	0.106495	0.101254
804	-0.401941	-0.306462	-0.00722094	0.168635	0.018263	-0.184924	-0.762797	-2.13871	-0.421754	-1.41682	-2.67613	-3.88579	-2.61824	-3.51001	-4.82058	-6.13138	16.1533	76.2372	9.36e-20	2.43e-18	3.00852	2.27671	0.987722	1.3282	0.770574	0.103293	0.101026	1.37413	1.57755	0.10017	0.103274	2.65759	0.106495	0.900582
805	-0.383872	-0.836816	-0.248239	0.0734407	-0.272018	-0.68467	-1.23068	-1.78138	-0.7395	-1.86568	-2.46388	-2.58649	-2.65897	-2.80734	-2.5836	-2.77243	16.761	80.6253	1.73e-20	7.47e-19	2.97484	2.22847	0.101372	0.808366	0.375008	0.103293	0.101026	0.969079	1.51873	0.10017	0.103274	2.63274	0.106495	0.125486
806	-0.633566	-0.620073	-0.00880751	0.1051	-0.306757	-0.539278	-0.790293	-2.23612	-0.904116	-1.76848	-2.85036	-3.79711	-2.92482	-3.44072	-4.48196	-5.05762	16.4836	89.2339	9.67e-21	5.77e-19	2.99507	2.25327	0.95983	1.35121	0.10018	0.103293	0.101026	1.2871	1.57451	0.10017	0.103274	2.64644	0.106495	0.101254
807	1.67452	0.923023	-0.0697594	-0.329349	0.955109	1.35502	1.22542	-0.0827527	1.79653	1.70769	0.380324	-1.58493	2.01441	1.34839	-0.951755	-3.07606	14.3933	25.9384	3.36e-13	4.82e-13	3.01716	2.2404	0.866575	1.16251	0.10018	0.103293	0.101026	1.30083	1.37627	0.10017	1.4984	2.66515	0.106495	2.44411
808	-0.288936	-0.324356	-0.340671	0.1762	-0.00685982	-0.386147	-1.28328	-2.35846	-0.47777	-1.80523	-2.84877	-4.25193	-2.74723	-3.71636	-4.62704	-6.26738	14.1569	49.3419	4.64e-17	2.3e-16	3.02555	2.32826	0.775787	1.79678	0.458039	0.103293	0.101026	1.27428	1.57614	0.345838	0.857563	2.6804	0.106495	0.101254
809	0.109606	0.000868599	-0.508026	-0.491569	0.321465	-0.175383	-1.17164	-1.59503	0.12462	-1.32959	-2.8673	-3.26495	-1.50497	-2.70808	-3.92553	-5.15107	13.5815	24.6884	6.53e-13	8.82e-13	2.98595	2.26493	0.101372	1.34757	0.572635	0.0969104	0.098995	1.28066	1.17689	0.0998303	0.82535	2.63565	0.828879	0.603622
812	-0.195916	-0.492967	-0.344353	0.184822	0.135372	-0.306968	-1.22898	-2.11821	-0.24821	-1.72823	-3.15379	-4.0777	-2.52818	-3.6008	-5.32179	-5.69272	15.8145	82.1791	3.18e-20	1.16e-18	2.99064	2.23912	0.300141	0.788673	0.249527	0.103293	0.101026	1.37038	1.57853	0.584559	0.240117	2.64829	0.106495	0.994824
813	-0.252011	-0.732068	-0.468075	0.0841571	-0.00776917	-0.573005	-1.64518	-2.13164	-0.334544	-1.98289	-2.62176	-3.3076	-2.21102	-3.40219	-3.36725	-3.65784	13.9151	39.9622	4.68e-16	1.39e-15	2.98388	2.24104	0.101372	1.67433	0.10018	0.103293	0.101026	1.03449	1.55356	0.10017	0.926777	2.63621	0.106495	0.386207
814	2.48437	2.24726	0.271854	-2.30595	1.55978	2.43897	2.27038	2.63487	2.80584	3.69047	2.46873	2.23233	4.12944	3.79823	2.62997	1.93857	14.1639	24.3176	8e-13	1.07e-12	3.05964	2.24933	0.101372	1.44982	0.309998	0.103293	0.101026	1.34396	1.40802	0.50265	1.6281	2.66556	0.106495	3.12769
815	-0.409689	-0.909919	-0.635708	-0.285773	-0.329561	-0.799243	-1.54908	-2.1752	-0.638502	-2.08934	-3.23032	-3.7034	-2.54284	-3.40416	-4.60836	-4.57208	15.7643	70.1422	2.32e-19	4.32e-18	2.97215	2.22134	0.101372	0.100986	0.10018	0.103293	0.101026	1.35195	1.44431	0.10017	0.103274	2.63037	0.106495	0.101254
817	-0.310538	-0.613663	-0.544488	0.0182938	0.118888	-0.442309	-1.26429	-2.14848	-0.392736	-1.944	-3.3395	-3.61472	-2.81797	-4.67784	-5.12717	-6.54508	14.0544	59.2302	1.61e-18	1.8e-17	2.99788	2.26838	0.101372	1.71859	0.10018	0.103293	0.101026	1.4041	1.58601	0.10017	0.103274	2.65378	0.758955	0.101254
818	3.48235	1.8174	0.576113	-3.51124	2.49345	2.69395	2.45712	1.63531	4.01337	3.80571	2.30088	0.706892	5.23059	4.29718	3.4173	2.45758	12.5069	32.6919	1.25e-14	2.37e-14	3.05938	2.22347	0.101372	0.880722	1.02529	0.103293	0.101026	1.4798	1.48445	0.10017	2.03505	2.68926	0.198002	3.17721
820	-0.260247	-0.320924	-0.0600975	-0.00281056	-0.141228	-0.442795	-0.827184	-1.92307	-0.530669	-1.48089	-2.83227	-3.74906	-1.92273	-2.79544	-4.23442	-4.9104	15.4332	67.0296	3.61e-19	5.65e-18	2.98039	2.23732	0.742572	0.66859	0.10018	0.103293	0.101026	1.31161	1.31033	0.756755	0.103274	2.63537	0.106495	0.570388
821	3.96547	2.60756	2.26581	-1.50911	2.72584	3.521	3.53672	2.22391	4.30135	4.78072	4.6078	1.13087	6.79594	6.49082	4.89408	1.97322	13.1922	45.4412	1.48e-16	5.75e-16	3.04069	2.1993	1.14059	0.100986	0.650237	0.687698	0.881787	1.38849	0.100977	0.10017	2.00279	2.66943	0.106495	3.13042
822	-0.365257	-0.511504	-0.0874877	0.141985	0.0204593	-0.326713	-0.988825	-2.20322	-0.539449	-1.58922	-2.99429	-3.88943	-2.67475	-3.28217	-4.92126	-6.48794	14.7452	67.2448	3.46e-19	5.5e-18	2.98674	2.24488	0.837907	0.100986	0.721684	0.103293	0.101026	1.27176	1.57132	0.788305	0.103274	2.63429	0.106495	0.859976
823	0.0686025	-0.353701	-0.468581	-0.0186401	0.208039	-0.378299	-1.529	-2.14959	0.0298496	-1.86576	-3.02055	-3.87183	-1.95718	-3.49648	-4.39643	-5.50986	14.1435	54.2806	5.82e-18	4.61e-17	2.99891	2.26561	0.101372	1.39472	0.882107	0.103293	0.101026	1.28976	1.42957	0.10017	0.894262	2.64956	0.106495	0.101254
824	-0.383947	-0.100074	0.0440286	0.276419	0.181511	-0.048574	-0.551466	-2.03921	-0.442303	-1.32579	-2.46858	-3.78819	-2.37273	-3.35181	-3.84152	-6.34294	14.3293	30.8224	3.24e-14	5.46e-14	3.01428	2.3005	1.07753	1.64371	0.10018	0.606558	0.136086	1.29467	1.60041	0.306704	0.259963	2.66275	0.106495	1.06002
825	3.69847	2.55636	2.22515	-1.11238	2.61274	3.16147	3.72302	1.71682	4.07728	4.38706	4.28467	1.26395	5.99937	5.62531	5.15062	2.25931	12.7404	39.7151	8.02e-16	2.17e-15	3.06914	2.21636	1.13568	1.96187	0.10018	0.65132	0.101026	1.47505	0.840652	0.268901	2.00948	2.70205	0.106495	3.13292
826	-0.536081	-0.448326	-0.074176	0.126721	-0.190715	-0.357909	-1.09997	-2.36716	-0.723211	-1.70165	-3.01522	-4.69916	-2.89949	-3.74744	-5.03312	-7.22982	15.5103	85.7017	1.73e-20	7.47e-19	3.00336	2.29356	1.02991	0.598564	0.711431	0.103293	0.101026	1.38583	1.57858	0.277233	0.621718	2.66214	0.106495	0.182999
827	-0.136064	-0.218749	-0.02937	0.0629155	-0.135003	-0.39264	-0.76947	-1.0333	-0.321349	-0.867145	-1.26969	-1.35796	-0.978174	-0.852651	-0.691843	-1.20892	16.0202	9.48491	9.77e-08	1.03e-07	2.94132	2.20117	0.101372	1.56886	0.10018	0.103293	0.101026	0.561847	1.09938	0.10017	0.103274	2.6254	0.106495	0.339883
828	-0.0310415	-0.18953	-0.0731957	-0.101885	-0.0234898	-0.43505	-0.789824	-1.67907	-0.238991	-1.20632	-2.27878	-2.59839	-1.33514	-2.08406	-2.29627	-3.05636	15.3168	44.5592	9.84e-17	4.1e-16	2.97462	2.23687	0.101372	1.62123	0.10018	0.103293	0.101026	1.2241	1.16074	0.10017	0.103274	2.63466	0.106495	0.101254
829	-0.277528	-0.662939	-0.560955	0.03424	-0.208501	-0.595742	-1.49267	-2.15413	-0.48366	-2.16896	-3.10713	-3.69891	-2.46082	-3.77911	-4.50044	-5.36409	14.5482	64.712	4.39e-19	6.37e-18	2.99024	2.2727	0.101372	1.55238	0.10018	0.103293	0.864423	1.26688	1.49231	0.10017	0.103274	2.65001	0.106495	0.101254
830	-0.324247	-0.525655	-0.176071	-0.0142893	-0.252899	-0.563414	-0.983293	-1.38721	-0.572325	-1.40067	-1.88121	-1.92045	-1.74725	-1.69981	-1.57833	-2.04071	16.4051	30.5491	2.14e-14	3.78e-14	2.95493	2.21049	0.101372	1.30343	0.10018	0.103293	0.101026	0.870239	1.31953	0.10017	0.103274	2.63198	0.106495	0.101254
832	-0.593888	-0.699403	-0.196099	0.118473	-0.325838	-0.60506	-1.09668	-2.10749	-0.912725	-1.87206	-2.91063	-3.27263	-2.91884	-3.45568	-3.81682	-4.23066	16.6727	152.734	1.28e-24	3.4e-21	2.99308	2.27549	0.542946	1.44302	0.10018	0.103293	0.101026	1.19538	1.5598	0.10017	0.103274	2.65212	0.106495	0.101254
833	0.0100823	0.205214	0.323823	-0.0924402	-0.313843	-0.182851	-0.138954	-0.29172	-0.19165	0.109652	0.222531	-0.0238091	0.451626	0.986697	1.07739	0.346808	16.4316	5.34203	4.19e-05	4.28e-05	2.84347	2.10901	0.101372	1.00549	0.10018	0.103293	0.101026	0.101889	0.100977	0.10017	0.103274	2.59463	0.106495	0.101254
835	-0.0855758	-0.282668	-0.572198	-0.355371	-0.0754651	-0.372345	-1.18163	-1.75667	-0.20116	-1.39783	-2.84294	-3.51868	-1.63022	-2.96898	-4.36326	-4.98478	14.9505	45.1387	1.63e-16	6.19e-16	2.97849	2.2387	0.175883	0.466928	0.384219	0.0969104	0.101026	1.27293	1.22016	0.10017	0.684364	2.63093	0.553213	0.963427
836	-0.094387	-0.141708	0.120402	0.190091	-0.150633	-0.280613	-0.512752	-0.919986	-0.380591	-0.661822	-1.12075	-1.20051	-0.831874	-0.580477	-0.571891	-0.827537	15.7259	6.80818	3.65e-06	3.74e-06	2.93102	2.18069	0.101372	1.04985	0.10018	0.103293	0.101026	0.101889	1.13988	0.10017	0.103274	2.61754	0.106495	1.00385
837	-0.255751	-0.632169	-0.619248	0.13636	0.00959485	-0.434207	-1.45485	-2.14042	-0.302806	-1.9277	-3.08464	-3.91528	-2.41166	-3.64228	-4.53768	-5.5318	15.2102	61.5301	2.02e-18	2.08e-17	2.9943	2.25944	0.101372	1.42057	0.10018	0.103293	0.644723	1.32241	1.57613	0.10017	0.103274	2.64906	0.106495	1.04349
838	-0.517501	-0.799929	-0.885314	-0.125842	-0.235767	-0.902725	-1.98396	-2.27709	-0.634479	-2.3527	-3.9201	-4.55548	-2.66413	-4.05397	-6.37615	-6.54309	13.6093	43.7582	2.51e-16	8.42e-16	2.99746	2.28228	0.101372	0.100986	0.10018	0.103293	0.546053	1.43878	1.54058	0.10017	0.866488	2.652	0.106495	0.35081
839	-0.0121365	-0.657647	-0.510961	-0.0661789	0.130291	-0.425845	-1.3906	-2.05313	-0.110865	-1.77111	-3.03065	-3.63537	-2.18927	-3.22435	-4.84419	-4.55297	15.2606	62.3587	1.67e-18	1.85e-17	2.97691	2.21282	0.101372	0.100986	0.628798	0.103293	0.101026	1.23896	1.48935	0.271833	0.499566	2.6258	0.106495	0.972374
841	0.113287	-0.446326	-0.551288	0.163885	0.36867	-0.149492	-1.38519	-2.21376	0.19506	-1.77497	-2.95425	-3.81416	-2.24142	-3.79293	-5.00071	-5.36107	14.3802	61.7005	1.14e-18	1.39e-17	2.98624	2.25334	0.101372	1.11639	1.00838	0.198273	0.276421	1.31565	1.58073	0.10017	0.103274	2.63129	0.106495	1.02059
842	0.116191	0.218554	0.215961	-0.412335	-0.278786	-0.263924	-0.21572	-0.331829	0.0274565	0.327259	0.352747	0.055975	0.842564	1.33271	1.22424	0.580175	16.107	8.28913	4.69e-07	4.85e-07	2.81658	2.06587	0.101372	0.127495	0.10018	0.103293	0.101026	0.101889	0.100977	0.10017	0.103274	2.57267	0.106495	0.153772
843	-0.390306	-0.436873	-0.133437	0.127555	-0.0952469	-0.273318	-0.76359	-2.05965	-0.532074	-1.42138	-2.69929	-3.79216	-2.61611	-3.33707	-4.75776	-5.27981	16.5744	60.9005	2.34e-18	2.34e-17	2.99106	2.24605	0.83339	0.871427	0.257626	0.103293	0.101026	1.28042	1.5692	0.10017	0.103274	2.64424	0.106495	1.07094
844	-0.205665	-0.438409	-0.325512	0.0217343	-0.0361766	-0.506872	-1.2332	-2.12563	-0.383685	-1.73133	-3.00135	-3.58147	-2.22504	-3.51058	-4.16674	-5.05344	16.5772	113.606	2.23e-22	6e-20	2.998	2.27653	0.182965	1.56995	0.43254	0.103293	0.101026	1.32211	1.44696	0.10017	0.103274	2.65155	0.106495	0.45659
845	-0.674983	-1.09915	-0.664303	-0.106168	-0.391306	-0.907674	-1.76327	-2.47086	-0.869558	-2.40648	-3.60588	-3.94638	-3.4046	-4.10844	-5.92742	-5.79692	15.099	86.4351	7.52e-21	5.13e-19	2.99081	2.25713	0.101372	0.100986	0.10018	0.103293	0.101026	1.26008	1.6241	0.180275	0.32182	2.65291	0.106495	0.101254
846	-0.713979	-0.480606	0.167088	0.11765	-0.349612	-0.422572	-0.486202	-2.16924	-0.999373	-1.57802	-2.68055	-3.79609	-2.86909	-3.26021	-4.4113	-5.35203	16.1984	71.3173	2.44e-19	4.39e-18	2.99818	2.25318	1.15049	1.34401	0.10018	0.103293	0.101026	1.28825	1.55008	0.10017	0.103274	2.6462	0.106495	0.101254
847	0.152231	-0.221836	-0.505359	0.0461306	0.519127	-0.042112	-1.41621	-2.21151	0.383097	-1.53337	-2.83563	-4.08429	-1.86023	-3.17263	-4.47165	-6.38492	13.8328	35.4344	4.75e-15	1.02e-14	2.99469	2.26951	0.101372	1.14362	1.02027	0.103293	0.101026	1.36672	1.5209	0.10017	0.912994	2.64792	0.106495	1.03628
848	-0.21634	-0.305598	-0.151657	0.199756	0.0958864	-0.215892	-0.852716	-1.99732	-0.321639	-1.3727	-2.71192	-3.68173	-2.28155	-3.32592	-4.17311	-5.1449	16.5247	81.6223	3.5e-20	1.23e-18	2.99761	2.2709	0.595297	1.49185	0.618668	0.103293	0.101026	1.28164	1.51001	0.10017	0.103274	2.64901	0.106495	0.977165
849	-0.379056	-0.643992	-0.160909	0.0970217	-0.33428	-0.491219	-0.931827	-1.57247	-0.747734	-1.47918	-2.32491	-2.49915	-2.32377	-2.51496	-2.44564	-2.37537	15.5544	53.0284	7.98e-18	6.01e-17	2.96986	2.21699	0.112149	0.100986	0.10018	0.103293	0.101026	0.718462	1.5059	0.10017	0.103274	2.62696	0.106495	1.00933
851	-0.693553	-0.570245	-0.149199	-0.0992617	-0.497369	-0.547379	-0.713432	-2.20266	-0.898162	-1.69245	-2.73355	-4.10705	-2.65822	-3.06998	-4.02892	-5.6214	14.473	58.5253	1.9e-18	2.04e-17	2.98633	2.22926	1.09892	0.100986	0.10018	0.103293	0.812606	1.34061	1.49593	0.10017	0.103274	2.63781	0.106495	0.65263
852	-0.451415	-0.289141	-0.172658	0.182291	-0.154115	-0.186996	-0.743935	-2.04741	-0.636241	-1.33472	-2.67835	-3.66323	-2.51007	-3.17688	-4.08268	-4.90331	15.4974	52.8474	1.76e-17	1.1e-16	2.99985	2.29025	0.849762	1.62801	0.10018	0.103293	0.164418	1.10567	1.53497	0.10017	0.326956	2.65395	0.106495	1.07896
853	-0.274314	-0.822338	-0.434208	0.131414	0.103287	-0.484569	-1.35917	-2.01666	-0.372101	-1.94211	-3.1321	-3.57582	-3.02363	-4.02616	-4.55435	-4.95287	15.5811	85.6999	9.35e-21	5.77e-19	2.97866	2.2267	0.101372	1.22327	0.514851	0.103293	0.101026	1.23311	1.60785	0.10017	0.103274	2.63886	0.484362	0.119741
854	-0.496506	0.0300402	-0.15507	0.184472	0.0743245	0.0209092	-0.536643	-2.19222	-0.357361	-1.39423	-2.45086	-3.96362	-2.25253	-3.29376	-4.02514	-5.64848	14.3102	29.3513	6.31e-14	1.01e-13	3.01017	2.30006	1.14549	1.28468	0.10018	0.103293	0.794333	1.38957	1.54172	0.490264	0.51528	2.66701	0.376418	0.979172
855	-0.245905	-0.573345	-0.443633	0.0870246	-0.00215198	-0.414132	-1.24783	-1.92633	-0.408981	-1.72663	-2.99197	-3.38694	-2.53329	-3.66413	-4.20433	-5.04567	15.954	75.9643	9.86e-20	2.49e-18	2.99092	2.26552	0.101372	1.48611	0.10018	0.103293	0.101026	1.2532	1.49909	0.10017	0.103274	2.64717	0.332037	0.828028
856	-0.335909	-0.382723	-0.655886	0.197718	0.206235	-0.137393	-1.20037	-1.99728	-0.3303	-1.57262	-3.3454	-3.74421	-2.63438	-4.36935	-5.23586	-6.97346	13.9582	41.1901	5.86e-16	1.68e-15	3.01663	2.31119	0.241858	1.34587	0.10018	0.103293	0.101026	1.44638	1.60221	0.198812	0.103274	2.67688	0.832237	1.08024
857	-0.40589	-0.896398	-0.489621	0.0980394	-0.148244	-0.724442	-1.57933	-2.36262	-0.661754	-2.2646	-3.49907	-4.04667	-3.07076	-3.99333	-5.36907	-5.68156	15.5871	98.4348	1.08e-21	1.45e-19	2.98965	2.24959	0.101372	0.959774	0.10018	0.103293	0.101026	1.38498	1.60626	0.534555	0.103274	2.65242	0.106495	0.262131
858	-0.0194318	-0.220732	-0.364297	-0.662192	-0.212547	-0.65675	-1.04336	-1.78432	-0.117447	-1.21332	-2.32616	-2.51396	-0.907317	-1.91978	-2.37807	-2.98164	15.0669	31.0862	1.67e-14	3.05e-14	2.96733	2.22614	0.101372	1.20253	0.511052	0.103293	0.101026	1.29636	0.736197	0.10017	0.380736	2.62259	0.106495	0.101254
859	0.215482	0.533819	0.406436	-0.242047	-0.0598583	0.013834	0.0953788	-0.0354549	0.184896	0.562024	0.668359	0.315105	1.03176	1.53807	1.57142	0.810347	16.0805	9.65412	8.47e-08	8.95e-08	2.81879	2.07779	0.101372	1.17635	0.10018	0.103293	0.101026	0.101889	0.100977	0.10017	0.103274	2.5818	0.106495	0.101254
860	-0.44622	-0.875054	-0.634681	-0.13331	-0.328917	-0.785514	-1.57345	-2.28501	-0.757127	-2.16512	-3.53877	-3.82437	-3.01217	-3.94715	-5.47055	-6.07907	15.898	83.841	2.38e-20	9.53e-19	2.99093	2.27302	0.101372	0.491945	0.10018	0.103293	0.101026	1.37959	1.51616	0.10017	0.103274	2.65511	0.106495	0.101254
861	-0.418685	-0.404352	0.00775145	0.0742192	-0.0982643	-0.323795	-0.793083	-2.24511	-0.554682	-1.56709	-2.69797	-3.9583	-2.54102	-3.41303	-4.84342	-5.96952	16.0321	66.0432	7.35e-19	9.57e-18	2.99004	2.24992	0.994049	0.460822	0.901239	0.103293	0.101026	1.24929	1.54525	0.10017	0.103274	2.63748	0.106495	0.780192
863	0.151149	-0.0248777	-0.00738835	-0.774468	-0.514514	-0.324327	-0.457845	-0.241236	0.225891	0.555618	0.695031	0.243019	1.5298	1.93162	1.81608	0.970873	13.3171	11.9978	6.6e-09	7.09e-09	2.7194	1.84852	0.098665	0.100986	0.10018	0.103293	0.098995	0.101889	0.100977	0.10017	0.103274	2.47319	0.106495	0.525845
864	-0.131086	0.215808	-0.0579813	-0.682535	-0.399251	-0.426322	-0.211361	-1.54767	-0.361421	-0.906025	-2.33279	-3.20227	-0.566562	-1.80034	-3.24238	-4.62591	13.4955	22.421	2.1e-12	2.66e-12	2.97281	2.22518	1.05736	0.100986	0.767641	0.103293	0.101026	1.38657	0.430691	0.10017	0.103274	2.62104	0.106495	0.56208
865	2.93763	2.3256	0.594992	-2.44847	1.89794	2.4816	2.36423	2.19354	3.39816	3.94254	2.89138	1.50107	5.30364	4.60835	3.14076	1.53652	13.4955	40.6515	6.57e-16	1.84e-15	3.05637	2.24892	0.181301	1.38799	0.10018	0.910215	0.469104	1.41198	1.38261	0.152069	1.91016	2.68399	0.560321	3.16472
866	-0.517068	-0.95393	-0.471726	0.0362229	-0.35654	-0.786305	-1.45154	-2.12178	-0.804516	-2.1504	-3.1581	-3.46409	-2.97378	-3.54175	-4.00557	-3.98933	16.6405	118.013	6.07e-23	2.55e-20	2.98139	2.24851	0.101372	0.519175	0.10018	0.103293	0.101026	1.18879	1.57786	0.10017	0.103274	2.64434	0.106495	0.386058
867	-1.0926	-0.661106	0.364933	0.163571	-0.745605	-0.552471	-0.467693	-2.17072	-1.45312	-1.9054	-2.70464	-4.2902	-3.64358	-3.86838	-4.7242	-5.83915	13.7941	49.1885	3.06e-17	1.67e-16	3.00412	2.28689	1.31009	0.100986	0.553227	0.103293	0.101026	0.950889	1.66021	0.10017	0.205989	2.65453	0.106495	0.101254
868	-0.250433	-0.750014	-0.451899	-0.0362672	-0.199419	-0.560124	-1.31032	-1.99798	-0.496394	-1.73401	-2.95027	-3.48895	-2.41593	-3.20414	-4.25874	-4.13422	16.0045	69.2041	3.06e-19	5.03e-18	2.97868	2.22737	0.101372	0.100986	0.10018	0.103293	0.101026	1.25759	1.4962	0.10017	0.103274	2.63711	0.106495	0.984826
869	-0.3608	-0.812193	-0.539699	-0.0570352	-0.126242	-0.687409	-1.61015	-2.27983	-0.429292	-2.0528	-3.38161	-3.99363	-2.47724	-3.67572	-4.95778	-5.30476	13.8459	60.8998	1.07e-18	1.32e-17	2.98274	2.25764	0.101372	0.100986	0.10018	0.663734	0.101026	1.34063	1.48593	0.478963	0.103274	2.6433	0.106495	0.473214
870	-0.410302	-0.786386	-0.51037	-0.0171375	-0.265112	-0.679315	-1.4067	-2.19432	-0.645385	-1.92442	-3.21648	-3.83871	-2.70079	-3.59717	-4.86552	-4.96632	16.6733	109.833	4.75e-22	8.91e-20	2.98523	2.26044	0.101372	0.669586	0.10018	0.103293	0.101026	1.32221	1.51565	0.10017	0.103274	2.64254	0.106495	0.783474
871	-0.49464	-1.03003	-0.605155	-0.0587293	-0.28774	-0.821458	-1.74023	-2.45495	-0.753522	-2.35566	-3.53425	-3.89877	-3.2301	-4.15591	-5.09944	-5.79405	15.1127	83.2734	1.41e-20	6.5e-19	2.98305	2.25809	0.101372	0.444304	0.10018	0.30433	0.101026	1.30966	1.6319	0.10017	0.103274	2.64295	0.106495	0.524284
873	-0.330788	-0.782109	-0.544796	0.0232499	-0.110444	-0.624663	-1.58322	-2.35224	-0.528771	-2.07838	-3.36329	-3.9377	-2.75119	-3.87009	-5.19357	-5.62974	16.5984	110.96	4.1e-22	8.03e-20	2.99432	2.27413	0.101372	0.862456	0.435178	0.103293	0.101026	1.31442	1.55945	0.10017	0.103274	2.6522	0.106495	0.647276
875	-0.470284	-0.270457	-0.127857	0.126304	-0.170422	-0.363884	-0.738122	-2.05994	-0.65879	-1.46757	-2.85581	-3.77711	-2.30989	-3.26655	-4.45634	-6.10341	15.7247	54.6318	1.1e-17	7.82e-17	3.01183	2.28999	0.968848	1.36272	0.10018	0.103293	0.101026	1.43089	1.45978	0.277233	0.103274	2.66987	0.106495	0.907502
877	-0.0969085	0.24162	-0.194799	-0.654541	-0.443804	-0.378235	-0.318592	-1.29383	-0.232227	-0.644498	-2.1754	-2.80492	-0.516048	-1.61796	-3.45742	-4.03276	13.9106	20.8529	6.14e-12	7.38e-12	2.98932	2.24982	0.931881	0.100986	0.358304	0.103293	0.101026	1.38193	0.244348	0.10017	0.103274	2.64117	0.106495	0.976663
878	-0.085391	-0.557269	-0.447254	-0.205791	-0.125452	-0.640008	-1.34935	-1.98911	-0.2808	-1.73623	-2.85452	-3.18183	-1.76179	-2.75833	-3.64033	-3.96408	16.3633	84.7177	8.34e-21	5.64e-19	2.97153	2.22587	0.101372	0.83834	0.384587	0.103293	0.101026	1.30156	1.29552	0.10017	0.103274	2.63231	0.106495	0.552162
880	0.190935	0.413996	0.0806282	-0.440145	-0.140548	-0.303316	-0.371447	-0.635589	0.151413	0.0309892	-0.190048	-0.433419	0.395745	0.422542	0.654173	-0.128666	14.4107	3.58358	0.00122325	0.00123021	2.88008	2.15497	0.101372	1.78361	0.10018	0.103293	0.101026	0.586461	0.100977	0.10017	0.103274	2.59775	0.106495	0.101254
881	-0.871702	-0.278592	0.130335	0.220229	-0.343851	-0.302295	-0.470283	-2.09507	-1.06085	-1.4986	-2.65103	-3.7899	-3.18812	-3.441	-4.34834	-6.00044	15.1814	45.8481	1.31e-16	5.16e-16	3.02485	2.32493	1.24841	1.6791	0.10018	0.103293	0.101026	1.38365	1.61154	0.10017	0.103274	2.68283	0.106495	0.641816
882	-0.163917	0.3781	0.121604	-0.706677	-0.541865	-0.00277997	0.668224	-0.334871	-0.366213	0.0156477	-0.459105	-1.79758	-0.588016	-1.05757	-2.01069	-2.93105	13.3933	12.6225	2.73e-09	2.97e-09	2.99125	2.23428	1.28208	0.722132	0.10018	0.103293	0.101026	1.25576	0.275452	0.10017	0.103274	2.6221	0.106495	1.27507
884	-0.281919	-0.66456	-0.350471	-0.0163114	-0.23736	-0.497804	-1.07861	-1.86112	-0.521138	-1.48984	-2.65658	-3.28408	-2.285	-2.82554	-3.42633	-3.4032	15.8553	52.8222	1.28e-17	8.82e-17	2.97068	2.21712	0.101372	0.100986	0.10018	0.103293	0.101026	1.1822	1.47566	0.10017	0.103274	2.63086	0.106495	1.07399
885	-0.125808	-0.336256	-0.73045	-0.353072	-0.118972	-0.364478	-1.05738	-1.55394	-0.135776	-1.33788	-2.63897	-3.36419	-1.66125	-2.86323	-4.12697	-4.55277	14.3939	33.065	1.23e-14	2.35e-14	2.97875	2.23911	0.101372	0.568803	0.10018	0.103293	0.101026	1.39247	1.20972	0.10017	0.103274	2.63773	0.492133	1.15844
886	-0.387805	-0.77287	-0.509576	-0.0256659	-0.270545	-0.673497	-1.40957	-2.1276	-0.651616	-1.89802	-3.14665	-3.72777	-2.57963	-3.45677	-4.41654	-4.53555	16.7307	102.156	1.36e-21	1.77e-19	2.98358	2.25282	0.101372	0.696025	0.10018	0.103293	0.101026	1.2751	1.49331	0.10017	0.103274	2.64335	0.106495	0.767201
887	0.0207041	-0.268094	-0.279376	-0.287214	0.0204326	-0.580299	-1.13083	-1.60002	-0.133869	-1.36984	-2.64023	-2.82253	-1.20271	-1.95102	-2.80641	-3.4382	13.9839	30.0098	2.67e-14	4.6e-14	2.97068	2.22172	0.101372	1.09114	0.10018	0.103293	0.101026	1.28328	1.03556	0.884884	0.103274	2.64152	0.106495	0.101254
888	0.324754	-0.0573445	-0.526905	0.18896	0.369668	-0.0101088	-1.06072	-1.67876	0.365857	-1.52528	-2.86888	-3.5217	-1.21272	-2.82454	-3.75321	-4.4173	13.1405	34.201	4.26e-15	9.31e-15	2.99743	2.24102	0.101372	1.50732	0.10018	0.142958	0.942919	1.37063	1.40675	0.252079	0.103274	2.65176	0.106495	1.1824
889	2.8656	1.50357	-0.298065	-1.08389	1.79122	2.02462	1.53212	0.321759	3.07539	2.28015	0.976847	-1.2751	3.81768	2.91166	0.588623	-1.83589	13.5214	42.087	2.89e-16	9.56e-16	3.02085	2.23406	0.101372	1.32334	0.10018	0.103293	0.358856	1.25755	1.30156	0.280397	1.81387	2.65784	0.106495	2.76873
890	3.07528	2.35505	1.07803	-2.3239	2.03561	2.86701	3.45033	2.03639	3.52782	4.34271	3.86505	0.94391	5.18141	5.24909	3.44152	0.251292	13.8799	40.5546	7.29e-16	1.98e-15	3.04467	2.21621	1.27314	1.27776	0.10018	0.103293	0.101026	1.20183	0.849602	0.467249	1.97601	2.67742	0.326802	3.0701
891	-0.703033	-0.577401	-0.237389	-0.0724361	-0.371674	-0.333996	-0.673612	-2.11683	-0.803047	-1.59459	-2.76757	-4.10496	-3.05287	-3.33924	-5.07792	-6.35472	14.8886	65.3211	7.92e-19	1.02e-17	2.98425	2.2176	1.05056	0.100986	0.10018	0.103293	0.101026	1.35112	1.55157	0.10017	0.103274	2.64089	0.636319	0.818904
894	-0.292325	-0.72732	-0.439694	0.213406	-0.00140239	-0.414391	-1.28271	-2.12446	-0.477238	-1.8095	-3.12615	-3.76372	-2.79019	-3.92956	-4.46807	-5.19333	15.8884	84.5983	1.79e-20	7.69e-19	2.99806	2.26301	0.101372	1.41403	0.10018	0.103293	0.101026	1.28895	1.61912	0.10017	0.103274	2.65005	0.106495	1.01075
895	-0.153185	-0.359888	0.111752	0.415317	0.038118	-0.236615	-0.603365	-0.751407	-0.323266	-1.16942	-1.46285	-1.0944	-2.17059	-1.72034	-1.10472	-1.20541	13.5577	13.0049	1.81e-09	1.97e-09	2.95381	2.15358	0.101372	1.65948	0.10018	0.103293	0.101026	0.158951	1.40434	0.10017	0.103274	2.62878	0.515129	0.671763
896	-0.199033	-0.436314	0.0692957	0.0744412	-0.421792	-0.539107	-0.656139	-0.919091	-0.613493	-0.873939	-0.715198	-0.95727	-0.952815	-0.348246	-0.0618233	-0.6379	15.0958	3.94562	0.000597926	0.000601926	2.90394	2.15901	0.101372	0.100986	0.326111	0.103293	0.101026	0.101889	1.03756	0.10017	0.103274	2.59831	0.106495	0.101254
897	0.399563	0.643024	0.171904	-0.339895	0.15969	0.0560657	0.0940708	-0.0201526	0.550943	0.529807	0.510221	0.120702	0.98594	1.23933	1.32521	0.70251	14.5539	5.56763	2.83e-05	2.89e-05	2.84733	2.108	0.101372	1.54177	0.10018	0.103293	0.101026	0.101889	0.100977	0.10017	0.103274	2.59281	0.106495	0.951526
898	3.35565	1.64224	0.0142724	-5.71873	2.12827	2.49164	2.25501	1.41416	3.557	3.40455	2.15458	0.679966	5.59637	4.62162	3.68832	1.77355	12.4137	50.3107	4.66e-17	2.3e-16	3.04621	2.22666	0.101372	0.100986	0.872983	0.551935	0.978227	1.49719	1.32136	0.10017	1.95529	2.67971	0.106495	3.14966
899	0.280391	0.671945	0.329345	-0.278227	0.0300264	0.0905273	0.0582059	-0.0813745	0.335236	0.613367	0.575641	0.219095	0.991501	1.38074	1.41587	0.713608	15.5286	7.53098	1.32e-06	1.36e-06	2.82743	2.11539	0.101372	1.45632	0.10018	0.103293	0.101026	0.101889	0.100977	0.10017	0.103274	2.59171	0.106495	0.452992
900	-0.308639	-0.685536	-0.454289	0.105439	-0.031697	-0.558179	-1.44457	-2.0476	-0.50163	-2.02623	-3.30287	-3.7518	-2.73134	-4.17794	-4.64816	-5.5801	15.519	90.9344	3.44e-21	3.13e-19	2.99676	2.27038	0.101372	1.48932	0.10018	0.103293	0.101026	1.33889	1.54491	0.343676	0.103274	2.65835	0.106495	0.101254
901	-0.356211	-0.69352	-0.413478	-0.0771358	-0.284369	-0.664655	-1.23275	-2.01948	-0.645456	-1.76618	-2.86015	-3.32046	-2.25956	-2.87639	-3.59649	-3.78298	16.8855	98.7799	1.77e-21	2.07e-19	2.97859	2.24426	0.101372	0.24517	0.10018	0.103293	0.101026	1.23085	1.43826	0.10017	0.103274	2.63644	0.106495	0.738461
902	-0.0276747	-0.653092	-0.455015	0.0957975	0.201714	-0.497941	-1.64895	-2.14057	-0.200751	-1.98171	-3.39164	-3.86243	-2.33528	-4.0581	-4.52953	-5.52341	14.7947	93.161	2.04e-21	2.23e-19	2.99354	2.25458	0.101372	1.68557	0.595667	0.103293	0.101026	1.40772	1.54591	0.417775	0.103274	2.63985	0.106495	0.101254
903	0.171251	-0.0185922	-0.570414	-1.0813	-0.188719	-0.567577	-1.11434	-1.73124	0.125458	-1.09711	-2.00468	-2.3905	-0.451918	-1.56137	-2.10071	-3.31598	13.7536	21.0019	3.57e-12	4.4e-12	2.96851	2.2361	0.101372	0.91997	0.861885	0.103293	0.101026	1.26708	0.280244	0.10017	0.103274	2.62762	0.106495	0.138683
904	0.430991	0.604687	-0.0266474	-0.404962	0.129418	-0.00483514	-0.200102	-0.235949	0.522568	0.376812	-0.0180634	-0.303436	0.815857	0.828328	0.691858	0.272708	14.6789	3.81854	0.000777915	0.000782484	2.86651	2.13016	0.101372	1.51549	0.10018	0.103293	0.101026	0.146369	0.100977	0.10017	0.103274	2.5948	0.106495	1.07866
905	-0.381365	-0.565654	0.075207	0.252843	-0.297552	-0.523269	-0.804068	-1.04824	-0.702144	-1.21491	-1.34829	-1.34412	-1.69305	-1.35202	-0.81207	-1.15515	15.7342	11.1044	1.66e-08	1.77e-08	2.94031	2.18997	0.101372	1.49842	0.10018	0.103293	0.101026	0.279742	1.37049	0.10017	0.103274	2.61867	0.106495	0.101254
906	-0.312875	-0.770411	-0.588955	-0.0581154	-0.0991897	-0.690523	-1.4844	-2.17564	-0.404003	-2.06068	-3.28539	-3.70396	-2.56129	-3.69505	-4.63789	-5.1287	15.591	67.4068	5.48e-19	7.69e-18	2.98254	2.23823	0.101372	1.20619	0.10018	0.103293	0.595645	1.3027	1.51018	0.122487	0.103274	2.63395	0.106495	0.101254
907	0.3655	0.596922	0.267854	-0.367499	0.0131736	0.0568246	-0.0579845	-0.0150853	0.404202	0.605352	0.598473	0.392156	1.25487	1.61187	1.47034	1.02209	15.5246	10.7328	2.48e-08	2.64e-08	2.82071	2.06711	0.101372	1.02104	0.10018	0.103293	0.101026	0.101889	0.100977	0.10017	0.103274	2.58168	0.106495	0.619149
909	-0.181474	-0.688907	-0.655532	-0.122565	0.0287359	-0.396216	-1.42202	-2.22217	-0.323126	-1.99818	-3.15658	-3.67949	-2.68062	-3.44667	-5.13534	-5.34732	14.4297	65.0934	4.03e-19	6.01e-18	2.98692	2.26976	0.101372	0.100986	0.970736	0.103293	0.101026	1.28803	1.50934	0.10017	0.103274	2.64268	0.442005	0.79354
910	-0.16298	-0.595827	-0.761929	-0.106314	0.038259	-0.261715	-1.45031	-2.44942	-0.0871613	-1.64849	-3.12195	-3.89412	-2.35605	-3.30455	-5.30848	-5.37656	14.2635	51.2486	2.4e-17	1.4e-16	2.98929	2.27433	0.101372	0.100986	0.910274	0.103293	0.101026	1.37955	1.55323	0.10017	0.103274	2.64317	0.106495	1.15674
911	0.286872	-0.00269244	-0.15383	-0.324429	0.266697	-0.285454	-0.912456	-1.39643	0.198685	-0.93482	-1.72392	-2.50956	-0.996456	-1.61801	-1.88466	-2.59595	13.9662	21.1866	3.17e-12	3.94e-12	2.96702	2.2106	0.101372	1.18005	0.762251	0.103293	0.101026	1.09078	0.987202	0.755728	0.103274	2.62866	0.194279	0.101254
912	-0.169931	-0.495362	0.060299	0.389078	0.223717	-0.256321	-0.986079	-2.16741	-0.343587	-1.57174	-2.86821	-3.69975	-2.65838	-3.77176	-4.38224	-5.7239	15.2916	98.7903	8.56e-22	1.22e-19	2.98984	2.22545	0.751702	1.32113	0.978806	0.103293	0.101026	1.20041	1.62093	0.357411	0.103274	2.64505	0.106495	0.14614
913	-0.809169	-0.984512	-0.294535	0.0612576	-0.501023	-0.819747	-1.38382	-2.57285	-1.12898	-2.14749	-3.37089	-3.94383	-3.66846	-3.81147	-5.1771	-5.24993	14.5961	76.7382	3.59e-20	1.24e-18	2.98607	2.26004	0.622657	0.100986	0.10018	0.103293	0.101026	1.16121	1.6694	0.685403	0.103274	2.63971	0.106495	0.101254
915	-0.284695	-0.717994	-0.275331	0.173889	-0.109382	-0.604226	-1.30778	-1.90465	-0.563139	-1.86762	-2.68088	-2.71302	-2.54068	-3.21097	-3.0787	-3.28632	15.9736	87.0712	5.56e-21	4.19e-19	2.98287	2.23484	0.101372	1.6547	0.10018	0.103293	0.101026	1.18651	1.52922	0.10017	0.103274	2.63873	0.106495	0.101254
916	-0.522909	0.297258	0.354451	0.295114	0.0816639	0.354739	0.514161	-0.978415	-0.375201	-0.389285	-1.197	-2.77475	-1.99813	-2.72867	-3.45065	-4.70185	14.0476	27.2636	1.72e-13	2.54e-13	3.01743	2.29511	1.43135	1.35093	0.10018	0.103293	0.101026	1.3916	1.55306	0.10017	0.514344	2.66568	0.182998	1.28829
917	-0.34219	-0.480752	-0.434205	0.0857037	-0.209605	-0.288951	-1.05168	-2.26965	-0.452926	-1.50353	-3.04571	-4.04892	-2.37124	-3.41254	-4.4171	-5.48733	14.7872	51.9718	2.23e-17	1.34e-16	2.99073	2.2564	0.757945	0.673583	0.10018	0.103293	0.788931	1.31659	1.59881	0.193275	0.480535	2.65071	0.106495	1.1289
918	-0.46705	-0.680763	-0.139462	-0.0317757	-0.162457	-0.412581	-0.899293	-2.31912	-0.618683	-1.75477	-2.94706	-4.03281	-2.88711	-3.59224	-4.8676	-6.49386	14.6483	69.4323	1.6e-19	3.39e-18	2.98913	2.22676	0.880532	0.100986	0.823729	0.103293	0.101026	1.3807	1.5597	0.10017	0.103274	2.64086	0.422056	0.101254
919	-0.0261807	-0.598835	-0.462851	-0.0987727	-0.0440478	-0.395418	-1.28519	-1.91356	-0.209486	-1.51119	-2.99531	-3.51578	-1.8821	-3.00106	-4.23606	-4.09937	15.0492	46.8138	9.74e-17	4.07e-16	2.97889	2.22471	0.101372	0.100986	0.10018	0.103293	0.101026	1.26346	1.44255	0.10017	0.62285	2.63513	0.106495	1.09174
920	-0.609966	-0.928509	-0.839198	0.0226992	-0.400474	-0.899763	-1.64183	-2.40095	-0.735058	-2.32822	-3.84054	-3.9981	-2.93013	-4.02753	-5.23505	-5.64113	14.0137	57.7586	2.31e-18	2.31e-17	2.98521	2.26961	0.101372	0.100986	0.10018	0.103293	0.939391	1.30426	1.59837	0.10017	0.103274	2.65413	0.106495	0.484694
921	0.118369	0.431109	0.391355	-0.277704	-0.21675	-0.0745669	0.0297667	-0.101993	0.0667726	0.469773	0.602104	0.261375	0.919772	1.44622	1.50146	0.709222	16.4366	9.97279	5.83e-08	6.17e-08	2.81373	2.07667	0.101372	1.01493	0.10018	0.103293	0.101026	0.101889	0.100977	0.10017	0.103274	2.57572	0.106495	0.101254
922	-0.0801382	-0.743229	-0.5581	0.212836	0.238537	-0.447257	-1.76022	-2.50104	-0.195213	-2.15164	-3.35721	-4.3933	-2.80855	-4.35046	-5.39667	-6.61671	14.9283	92.7649	2.65e-21	2.69e-19	2.99787	2.29141	0.101372	1.25818	0.844977	0.464764	0.101026	1.35016	1.64731	0.10017	0.103274	2.65102	0.106495	0.500108
923	-0.105674	-0.644243	0.126159	0.369951	-0.0642647	-0.44452	-0.785116	-1.1939	-0.410726	-1.45465	-1.64581	-1.66048	-2.06037	-1.97503	-1.44017	-1.46259	14.839	23.5728	7.47e-13	1e-12	2.95443	2.16287	0.101372	0.46655	0.673783	0.103293	0.101026	0.211525	1.52032	0.10017	0.103274	2.60988	0.106495	0.73722
924	-0.297465	-0.48708	-0.54369	0.181843	0.0233907	-0.362772	-1.326	-2.08907	-0.437262	-1.76692	-3.10214	-3.73073	-2.64426	-3.86407	-4.83293	-6.06962	15.4286	66.8798	6.13e-19	8.31e-18	3.01231	2.30249	0.101372	1.66184	0.10018	0.103293	0.101026	1.31883	1.55249	0.10017	0.103274	2.66996	0.326243	0.925677
925	-0.401579	-0.523317	-0.268854	0.0548075	-0.120385	-0.440349	-0.996073	-2.12571	-0.56465	-1.64073	-3.01552	-3.83902	-2.50716	-3.4621	-4.58443	-5.47811	16.8894	95.4564	3.64e-21	3.27e-19	2.99394	2.26103	0.592402	1.31101	0.10018	0.103293	0.101026	1.35289	1.50934	0.10017	0.103274	2.64847	0.106495	0.807507
926	-0.41988	-0.976051	-0.189607	0.190659	-0.327435	-0.672247	-1.13091	-1.56605	-0.848169	-1.80236	-2.34588	-2.26451	-2.56148	-2.60434	-2.25111	-2.00476	15.2504	42.5033	1.94e-16	7.06e-16	2.95794	2.18831	0.101372	0.100986	0.10018	0.103293	0.101026	0.59194	1.58762	0.10017	0.103274	2.61608	0.106495	0.647299
928	-0.23323	-0.652143	-0.329923	0.306902	0.1739	-0.408976	-1.37487	-2.24648	-0.494573	-1.89876	-3.12561	-3.87009	-2.6712	-3.98404	-4.73821	-6.13125	14.2582	79.997	1.94e-20	8.2e-19	3.01224	2.30227	0.199071	1.87383	0.408054	0.343346	0.101026	1.24762	1.62601	0.599694	0.103274	2.67471	0.106495	0.242321
929	-0.429049	-0.638328	-0.5713	-0.169989	-0.314578	-0.512761	-1.19419	-2.05264	-0.634837	-1.64898	-3.23081	-3.81756	-2.59329	-3.64733	-4.83034	-5.1752	15.5042	60.2652	2.72e-18	2.64e-17	2.98417	2.25519	0.258616	0.100986	0.10018	0.103293	0.101026	1.31984	1.47005	0.10017	0.103274	2.64117	0.292783	0.991752
930	-0.289808	-0.473034	-0.40019	-0.0115753	0.0089172	-0.450023	-1.27049	-2.17439	-0.417201	-1.73368	-3.20803	-4.02902	-2.44304	-3.7542	-4.88308	-6.02193	16.5659	95.4692	3.64e-21	3.27e-19	2.99214	2.27344	0.355774	1.33972	0.213169	0.103293	0.101026	1.36144	1.48241	0.10017	0.148298	2.64618	0.12731	0.617746
931	-0.205247	-0.751343	-0.482026	-0.371799	-0.0415552	-0.704113	-1.37745	-1.86972	-0.334838	-1.87346	-2.94865	-3.036	-2.19933	-3.0574	-3.61265	-3.75954	14.4706	41.8311	2.46e-16	8.33e-16	2.96499	2.16643	0.101372	0.100986	0.24977	0.103293	0.101026	1.15611	1.34161	0.10017	0.214596	2.61112	0.465466	0.101254
932	-0.47145	-0.704591	-0.376522	0.0206671	-0.264113	-0.587401	-1.33735	-2.31601	-0.757785	-1.84189	-3.21792	-3.8699	-2.7321	-3.74511	-4.59785	-4.7687	16.2814	93.0408	5.28e-21	4.03e-19	2.98866	2.26338	0.329541	1.03699	0.10018	0.103293	0.101026	1.18904	1.54903	0.10017	0.586518	2.63983	0.106495	0.733944
933	0.0512372	0.0459504	-0.609467	-1.02512	-0.381888	-0.511789	-0.870477	-1.39133	-0.0556372	-0.676672	-1.47939	-1.60762	-0.0459535	-0.426906	-0.958684	-1.5209	14.2787	7.14208	2.32e-06	2.39e-06	2.92789	2.19312	0.101372	0.597098	0.10018	0.103293	0.101026	1.07341	0.100977	0.10017	0.103274	2.61392	0.106495	0.853367
934	-0.509616	-0.21324	-0.0525376	0.209819	0.0632297	-0.10348	-0.565666	-2.05208	-0.507635	-1.34148	-2.46669	-4.16835	-2.81772	-3.58452	-5.12079	-6.9953	14.6802	52.213	2.09e-17	1.28e-16	3.00875	2.30116	1.10596	1.31608	1.00747	0.103293	0.101026	1.35159	1.58859	0.10017	0.103274	2.66424	0.576104	0.857023
935	-0.618016	-0.494895	0.0406504	0.104264	-0.186184	-0.204416	-0.614659	-2.143	-0.687644	-1.4383	-2.51502	-3.86518	-2.92773	-3.40166	-4.40856	-5.68812	15.2764	47.7551	7.36e-17	3.28e-16	2.99682	2.24019	1.09384	0.413127	0.706226	0.103293	0.12603	1.21376	1.63979	0.10017	0.103274	2.6452	0.106495	1.08272
936	-0.173138	-0.53204	-0.71037	-0.325916	-0.237303	-0.537218	-1.44453	-1.83511	-0.353178	-1.65064	-3.12338	-3.40332	-1.71676	-2.99731	-4.02601	-4.27568	14.6388	42.6943	3.01e-16	9.87e-16	2.97804	2.23614	0.101372	0.100986	0.10018	0.103293	0.101026	1.25942	1.26148	0.10017	0.791423	2.63568	0.106495	0.910096
937	-0.602675	-0.484365	0.203747	0.175324	-0.150641	-0.339508	-0.611954	-2.34554	-0.738148	-1.61224	-2.69238	-4.00197	-2.96554	-3.4738	-4.76523	-6.15693	15.7229	65.7029	7.91e-19	1.02e-17	2.99233	2.22701	1.17395	1.23328	0.583004	0.103293	0.101026	1.34052	1.62774	0.10017	0.103274	2.641	0.106495	0.164917
938	-0.00746702	-0.0042692	-0.223243	-0.500662	-0.235739	-0.564345	-0.88939	-1.32418	-0.153461	-0.930918	-1.62151	-1.58533	-0.540754	-1.0477	-1.25257	-1.73399	14.8277	11.1204	1.38e-08	1.47e-08	2.9486	2.20329	0.101372	1.4633	0.10018	0.103293	0.101026	1.13145	0.474371	0.10017	0.541125	2.63098	0.106495	0.101254
939	-0.767993	-0.611517	-0.141553	0.0112334	-0.586165	-0.632741	-0.811428	-2.29887	-1.11232	-1.92945	-3.03374	-3.64571	-2.93915	-3.13843	-4.62194	-4.90892	14.7217	56.6864	4.07e-18	3.57e-17	2.99331	2.25134	0.92676	0.682878	0.10018	0.103293	0.811827	0.839547	1.52967	0.10017	0.103274	2.64605	0.106495	0.356024
940	-0.0329368	-0.0558212	-0.358333	-0.471338	-0.199652	-0.523799	-0.874418	-1.4532	-0.153567	-1.01606	-2.15833	-2.23613	-0.851733	-1.56658	-2.00824	-2.50571	15.505	21.059	5.4e-12	6.56e-12	2.97074	2.23499	0.101372	1.4452	0.10018	0.103293	0.101026	1.22209	0.77954	0.10017	0.103274	2.63271	0.106495	0.574986
941	-0.888371	-0.360281	0.288796	-0.0326763	-0.764039	-0.530868	-0.14525	-1.70748	-1.38858	-1.38908	-2.36105	-3.2514	-2.82363	-2.75352	-3.87679	-4.48061	15.5286	61.4881	1.5e-18	1.72e-17	2.99459	2.25603	1.30089	0.640406	0.10018	0.103293	0.101026	1.02781	1.40694	0.10017	0.103274	2.6409	0.106495	0.186049
942	-0.392194	-0.727296	-0.414787	0.128466	-0.1888	-0.637955	-1.42364	-2.14084	-0.693518	-1.98327	-3.05667	-3.17918	-2.71387	-3.70805	-3.73586	-4.1812	15.9462	101.211	5.97e-22	1.01e-19	2.99579	2.27429	0.101372	1.67303	0.10018	0.103293	0.101026	1.24277	1.54658	0.10017	0.103274	2.6541	0.106495	0.101254
943	-0.367521	-0.796192	-0.595928	-0.216124	-0.263666	-0.659735	-1.62691	-2.29008	-0.573317	-2.055	-3.39189	-3.88421	-2.59352	-3.68585	-5.22677	-5.04949	15.1287	75.1039	6.1e-20	1.86e-18	2.98241	2.26521	0.101372	0.100986	0.10018	0.103293	0.101026	1.37633	1.48579	0.10017	0.103274	2.64228	0.106495	0.900233
944	-0.66989	-0.869005	-0.184871	0.00944441	-0.511502	-0.713229	-1.03647	-2.06193	-1.06001	-1.95057	-2.7941	-3.1999	-3.08552	-3.15231	-3.46208	-3.39702	16.439	102.595	4.88e-22	9.02e-20	2.97644	2.23591	0.564759	0.100986	0.10018	0.103293	0.101026	1.04259	1.56864	0.10017	0.103274	2.63344	0.106495	0.401838
946	-0.612188	-0.621822	0.187478	0.0942336	-0.258571	-0.52395	-0.646929	-1.70891	-0.832089	-1.68928	-2.37518	-2.51713	-2.3265	-2.60728	-2.98293	-3.24092	13.1478	28.6763	5.03e-14	8.14e-14	2.96622	2.20774	0.941549	0.100986	0.847229	0.103293	0.101026	0.323927	1.48875	0.70141	0.103274	2.6178	0.106495	0.101254
949	-0.600381	-0.32774	0.159875	0.15331	-0.307619	-0.418295	-0.563639	-2.16454	-0.961583	-1.44178	-2.74381	-3.80754	-2.66728	-3.21857	-4.25652	-5.41102	15.7766	67.6821	5.17e-19	7.31e-18	3.00443	2.2777	1.11154	1.51907	0.10018	0.103293	0.101026	1.20015	1.50894	0.161999	0.198827	2.65909	0.106495	0.101254
951	-0.544307	0.0431277	0.221972	-0.0151965	-0.476568	0.00356032	0.517302	-0.336781	-0.759706	-0.198184	-0.878291	-1.30739	-1.62478	-1.707	-1.97859	-2.07754	14.001	11.8253	7.85e-09	8.41e-09	2.98667	2.21407	1.15724	0.668689	0.10018	0.103293	0.101026	0.424129	1.26686	0.10017	0.103274	2.62265	0.106495	1.36845
952	-0.244581	-0.561245	-0.347078	0.0304023	-0.0228326	-0.507127	-1.35716	-2.28952	-0.453575	-1.92237	-3.21604	-3.93549	-2.61507	-3.81394	-4.84568	-5.71337	16.3055	99.8763	1.89e-21	2.15e-19	3.00003	2.28463	0.259367	1.35936	0.712238	0.103293	0.101026	1.33712	1.52206	0.10017	0.103274	2.65119	0.106495	0.101254
953	-1.0622	-0.479486	0.270329	0.147323	-0.587318	-0.432533	-0.488409	-2.12416	-1.2811	-1.73871	-2.57253	-4.06724	-3.28979	-3.23871	-4.23404	-5.99438	14.848	45.0541	1.67e-16	6.35e-16	3.00299	2.28661	1.30608	0.702243	0.10018	0.103293	0.101026	1.27107	1.58265	0.397683	0.103274	2.65417	0.106495	0.101254
954	-0.403071	-1.13079	-0.911413	0.327784	-0.214709	-0.748384	-2.18398	-2.40429	-0.777677	-2.90077	-3.36918	-4.4246	-3.5618	-4.16275	-5.59245	-6.72278	12.6543	37.8641	1.62e-15	4.04e-15	3.01326	2.33583	0.101372	0.100986	0.946536	0.103293	0.653844	1.455	1.75812	0.10017	0.103274	2.68723	0.106495	0.101254
955	-0.497686	-0.687991	-0.249109	0.0602754	-0.200354	-0.472316	-1.2075	-2.44138	-0.636879	-1.89057	-3.19592	-4.29421	-3.01278	-3.68674	-5.33931	-6.48228	16.0804	80.3649	4.38e-20	1.47e-18	2.99101	2.27832	0.728554	0.100986	0.692553	0.103293	0.101026	1.35738	1.59994	0.10017	0.103274	2.64877	0.106495	0.712462
956	-0.431047	-0.781551	-0.363684	0.0979829	-0.197102	-0.629775	-1.29161	-2.22311	-0.682887	-1.97389	-3.14683	-3.71989	-2.78908	-3.74369	-4.56588	-4.95541	16.8292	142.749	6.41e-24	6.4e-21	2.99152	2.25347	0.155174	1.30365	0.10018	0.103293	0.101026	1.31058	1.56724	0.10017	0.103274	2.65139	0.106495	0.447679
957	-0.57841	-0.492967	0.136437	0.144495	-0.22716	-0.396845	-0.609547	-2.14906	-0.779527	-1.60221	-2.75039	-4.04918	-2.87504	-3.4223	-4.60034	-5.86833	16.4569	77.6028	7.25e-20	2.11e-18	2.99744	2.25241	1.09466	1.16553	0.363188	0.103293	0.101026	1.33379	1.56944	0.10017	0.103274	2.64583	0.106495	0.101254
958	-0.661427	-0.507241	0.196753	0.171418	-0.552412	-0.565929	-0.588807	-1.32237	-1.14717	-1.43915	-1.81083	-1.77763	-2.43829	-2.11625	-1.70016	-1.96295	15.6085	24.0427	9.31e-13	1.24e-12	2.97494	2.23899	0.633354	1.49872	0.10018	0.103293	0.101026	0.424008	1.41911	0.10017	0.103274	2.63727	0.106495	0.101254
960	-0.0380598	-0.246814	-0.254581	0.223793	0.038914	-0.484063	-0.888214	-0.964459	-0.412511	-1.16108	-1.42382	-1.49572	-1.78512	-1.54939	-1.02074	-1.48423	12.9409	8.32942	3.59e-07	3.73e-07	2.95994	2.21642	0.101372	1.76027	0.481168	0.103293	0.101026	0.180492	1.30331	0.882683	0.103274	2.6231	0.106495	0.375501
961	-0.475584	-0.870366	-0.455107	-0.0415357	-0.267474	-0.680307	-1.40088	-2.01705	-0.704518	-1.99539	-3.07911	-3.30434	-2.86008	-3.55977	-3.89065	-3.94757	16.696	108.05	3.3e-22	7.07e-20	2.98075	2.23711	0.101372	0.998135	0.10018	0.103293	0.101026	1.20427	1.53741	0.10017	0.103274	2.64058	0.106495	0.334998
962	-0.737114	-0.939362	-0.0940553	0.0763165	-0.532458	-0.67537	-1.0647	-1.18809	-1.1553	-1.83865	-1.81999	-1.67053	-2.80332	-2.24611	-1.44517	-1.46461	14.2512	14.4438	6.24e-10	6.92e-10	2.94802	2.23862	0.101372	0.896778	0.10018	0.103293	0.101026	0.123448	1.50725	0.10017	0.103274	2.61377	0.106495	0.101254
963	-0.691718	-0.347399	-0.0324444	-0.0109323	-0.448692	-0.386655	-0.539673	-1.96956	-0.954883	-1.35374	-2.61101	-3.82515	-2.63891	-3.16356	-4.57971	-5.73381	16.1126	49.8255	4.04e-17	2.11e-16	2.99566	2.28319	1.12094	0.85039	0.10018	0.103293	0.101026	1.28573	1.47182	0.10017	0.103274	2.65024	0.106495	1.00259
964	-0.350657	-0.747332	-0.657907	-0.360421	-0.295368	-0.713445	-1.41046	-2.06325	-0.561772	-2.00896	-3.12238	-3.49683	-2.34298	-3.37802	-4.45471	-4.90706	15.168	55.3739	9.06e-18	6.62e-17	2.97492	2.22679	0.101372	0.100986	0.279031	0.103293	0.101618	1.27112	1.35927	0.10017	0.103274	2.6367	0.437005	0.101254
965	-0.777777	-0.167569	0.249498	0.222669	-0.307645	-0.207269	-0.174638	-1.76114	-0.971403	-1.2293	-2.21836	-3.49312	-2.71888	-3.05891	-4.07218	-5.86923	15.6439	41.0149	6.22e-16	1.77e-15	3.01676	2.30005	1.26668	1.60373	0.10018	0.103293	0.101026	1.28874	1.51329	0.10017	0.103274	2.67264	0.106495	0.709108
966	0.152185	0.548028	0.769711	0.0591682	-0.0130493	0.0800437	0.294047	-0.0204836	0.0117193	0.402718	0.881621	0.0513953	0.312968	1.25051	1.67994	0.379747	14.3157	5.92431	1.55e-05	1.59e-05	2.84302	2.12199	0.101372	0.99908	0.787677	0.103293	0.101026	0.101889	0.100977	0.225431	0.103274	2.58367	0.106495	0.101254
967	-0.162283	-0.701769	0.0887029	0.423297	-0.0392748	-0.433545	-1.01048	-1.18966	-0.461818	-1.62642	-1.87818	-1.73519	-2.40576	-2.34102	-1.56484	-1.7602	14.2611	19.1641	1.54e-11	1.81e-11	2.95498	2.18837	0.101372	1.05059	0.775036	0.103293	0.101026	0.180807	1.58793	0.10017	0.103274	2.62038	0.106495	0.492022
968	0.279628	0.478328	-0.287667	-1.07336	0.110754	0.0335087	-0.742469	-0.869937	0.417298	-0.543502	-1.5695	-1.95527	0.0349402	-1.27656	-1.99688	-2.88615	13.1614	14.4487	5.09e-10	5.66e-10	2.97261	2.25347	0.101372	1.35845	0.149054	0.103293	0.101026	1.19669	0.100977	0.10017	0.103274	2.63265	0.769428	0.867431
969	-0.338233	0.161812	-0.416163	-0.840302	-0.656448	-0.38139	-0.282717	-1.38383	-0.318846	-0.82968	-2.43474	-2.80803	-0.609058	-1.77207	-3.92286	-4.47828	13.4431	20.908	5.67e-12	6.87e-12	3.00189	2.27585	0.989064	0.100986	0.164695	0.103293	0.203473	1.33581	0.186889	0.10017	0.103274	2.64869	0.106495	1.01858
970	-0.279671	-0.522141	-0.624221	-0.391719	-0.293152	-0.720266	-1.31683	-1.98477	-0.561818	-1.85528	-3.16308	-3.35798	-2.02458	-3.27769	-4.33333	-4.90817	15.2563	61.3475	1.5e-18	1.71e-17	2.99181	2.27665	0.101372	1.09977	0.10018	0.103293	0.324237	1.34889	1.26151	0.10017	0.103274	2.65369	0.115631	0.101254
971	-0.774229	-0.882505	-0.228048	0.0231352	-0.41971	-0.636392	-1.00324	-2.42202	-0.986094	-2.0198	-3.22195	-4.01934	-3.46362	-3.75008	-5.15901	-6.03817	15.6591	98.0144	9.9e-22	1.36e-19	2.98105	2.22413	0.8656	0.807464	0.10018	0.103293	0.101026	1.28817	1.63884	0.10017	0.103274	2.6414	0.227647	0.101254
972	0.196293	0.0423628	-0.33303	-0.677535	-0.032472	-0.440331	-1.06835	-1.62381	0.194714	-1.06769	-2.26065	-2.74847	-0.639789	-1.82849	-2.76184	-3.54301	14.4593	29.5382	4.12e-14	6.83e-14	2.97794	2.26576	0.101372	1.26105	0.851411	0.103293	0.101026	1.33493	0.659312	0.10017	0.103274	2.63396	0.106495	0.939584
973	-0.171362	-0.506718	-0.40745	0.0666177	-0.05033	-0.409774	-1.05654	-1.85936	-0.33837	-1.47494	-2.84094	-3.45005	-1.98975	-3.065	-3.76972	-4.18067	16.1351	61.3954	2.08e-18	2.13e-17	2.98733	2.24422	0.101372	1.24604	0.10018	0.103293	0.101026	1.2954	1.45001	0.10017	0.103274	2.63945	0.106495	1.07758
974	-0.83139	-0.609352	0.127148	0.196138	-0.326114	-0.41053	-0.72818	-2.35674	-1.04746	-1.78605	-2.81762	-4.24345	-3.5879	-3.74827	-4.90886	-6.5684	15.9946	60.2909	2.7e-18	2.63e-17	3.00706	2.27746	1.17653	1.12006	0.381095	0.103293	0.101026	1.31702	1.67476	0.10017	0.103274	2.66136	0.106495	0.101254
975	-0.498044	-0.348304	0.141997	-0.0797721	-0.534501	-0.579038	-0.431743	-1.2442	-0.927452	-0.988332	-1.37342	-1.58987	-1.2066	-0.852212	-0.955133	-1.47957	16.5253	11.9579	6.87e-09	7.37e-09	2.93119	2.1883	0.55337	0.641227	0.10018	0.103293	0.101026	0.572429	1.09396	0.10017	0.103274	2.6152	0.106495	0.101254
976	-0.458486	-0.94661	-0.376351	0.0321002	-0.331166	-0.765015	-1.4017	-2.04322	-0.80195	-2.09835	-2.944	-3.14991	-2.94101	-3.35899	-3.57758	-3.51699	16.6737	104.091	4.05e-22	8.03e-20	2.97872	2.23391	0.101372	0.777946	0.10018	0.103293	0.101026	1.19472	1.5656	0.10017	0.103274	2.63856	0.106495	0.101254
977	-0.943264	-0.681772	0.152354	0.149573	-0.484644	-0.286378	-0.711179	-2.46076	-1.0968	-1.79083	-2.77756	-4.31379	-3.46249	-3.84452	-4.72313	-6.14503	14.3553	51.355	2.64e-17	1.48e-16	2.99786	2.27603	1.21114	0.100986	0.630412	0.103293	0.477213	1.10294	1.70689	0.10017	0.103274	2.64319	0.106495	0.771251
978	-0.0926492	-0.542655	-0.324768	0.206904	0.147091	-0.359899	-1.35076	-2.18184	-0.201103	-1.82826	-3.12284	-3.7954	-2.46196	-3.84884	-4.35643	-5.34609	15.9365	96.2151	1.55e-21	1.93e-19	2.99955	2.27445	0.101372	1.44074	0.726555	0.103293	0.101026	1.27059	1.56647	0.10017	0.103274	2.65212	0.106495	0.826273
979	-0.449436	-0.47023	0.133951	0.241302	-0.0735677	-0.300877	-0.702234	-2.18434	-0.611757	-1.55998	-2.65162	-3.74515	-2.78392	-3.54047	-4.71103	-5.80267	16.3597	108.673	5.55e-22	9.63e-20	2.99784	2.24549	1.0044	1.28846	0.785592	0.103293	0.101026	1.19773	1.59901	0.10017	0.103274	2.64806	0.106495	0.440862
981	-0.597913	-0.230514	0.0320968	-0.228103	-0.804018	-0.600978	-0.349797	-1.47048	-1.09855	-1.21524	-1.89803	-2.09294	-1.66142	-1.52174	-1.96898	-2.44704	15.0018	20.3037	6.48e-12	7.77e-12	2.96683	2.24883	0.941636	0.100986	0.10018	0.103293	0.101026	0.743079	1.06578	0.10017	0.103274	2.63005	0.106495	0.101254
982	-0.174543	-0.46696	-0.340941	-0.401928	-0.304542	-0.726275	-1.08306	-1.72648	-0.412699	-1.39977	-2.11728	-2.33661	-1.18726	-1.55369	-1.94965	-2.44413	16.1297	24.8692	5.92e-13	8.08e-13	2.947	2.1899	0.101372	0.74095	0.10018	0.103293	0.101026	1.21277	1.01088	0.10017	0.103274	2.61708	0.106495	0.101254
983	-0.184417	-0.456627	-0.220904	0.26276	-0.0466275	-0.347619	-0.929195	-1.65661	-0.396389	-1.35743	-2.36223	-2.66282	-2.16583	-2.60783	-2.5844	-2.87036	16.0291	59.2038	1.61e-18	1.8e-17	2.98368	2.24772	0.101372	1.35027	0.10018	0.103293	0.101026	0.993607	1.48062	0.10017	0.103274	2.63986	0.106495	1.07922
984	-0.581987	-0.427977	0.196978	-0.0122317	-0.465445	-0.488427	-0.520144	-2.12869	-1.00646	-1.67977	-2.94184	-3.79192	-2.54579	-3.1362	-4.80472	-5.50023	14.6682	62.5272	8.04e-19	1.03e-17	2.98074	2.2432	1.12339	0.100986	0.351099	0.103293	0.101026	1.03377	1.4392	0.458883	0.383677	2.63387	0.106495	0.101254
985	-0.615009	-1.00368	-0.181362	0.128459	-0.545054	-0.797162	-1.05635	-1.38826	-1.02458	-1.81623	-2.06084	-1.86741	-2.50121	-2.22116	-1.77004	-1.66818	15.4368	22.9999	1.61e-12	2.08e-12	2.95682	2.20609	0.101372	0.100986	0.10018	0.103293	0.101026	0.433225	1.50112	0.10017	0.103274	2.62134	0.106495	0.191706
986	-0.796587	-1.0216	-0.523927	-0.0486976	-0.52524	-0.858189	-1.49066	-2.59545	-1.08094	-2.28675	-3.54186	-4.29899	-3.65914	-4.10853	-5.37087	-6.04	15.9423	98.5384	1.82e-21	2.11e-19	2.9912	2.27714	0.382021	0.115022	0.10018	0.103293	0.101026	1.33368	1.63983	0.10017	0.103274	2.65248	0.106495	0.101254
987	-0.121645	-0.164795	0.0435866	-0.0938793	-0.216835	-0.423089	-0.545062	-1.159	-0.331937	-0.788883	-1.24219	-1.50189	-0.687749	-0.688836	-0.737176	-1.28988	17.078	14.2178	8.27e-10	9.14e-10	2.93006	2.16676	0.101372	1.27316	0.10018	0.103293	0.101026	0.875004	0.903573	0.10017	0.103274	2.61282	0.106495	0.476498
988	-0.268436	-0.711179	-0.451911	-0.0647065	-0.203283	-0.548214	-1.23826	-1.9399	-0.48526	-1.64612	-2.8425	-3.43442	-2.23906	-2.95782	-3.93722	-3.87431	16.0953	61.7985	1.9e-18	2.04e-17	2.97502	2.23426	0.101372	0.180228	0.10018	0.103293	0.101026	1.26193	1.45196	0.10017	0.103274	2.63716	0.106495	1.02208
989	0.156483	0.504867	0.492827	-0.0534151	-0.119266	-0.0407302	0.142809	0.0104439	0.132676	0.465369	0.571211	0.307542	0.82495	1.32712	1.46726	0.769798	15.9987	6.90259	3.31e-06	3.4e-06	2.83047	2.08517	0.101372	1.37029	0.10018	0.103293	0.101026	0.101889	0.100977	0.10017	0.103274	2.58489	0.106495	0.101254
991	3.067	2.67793	2.49793	-0.546731	1.47637	2.69687	4.67978	3.46577	2.57419	4.88454	5.5035	2.38746	5.11624	6.72516	5.2193	0.946404	12.4969	40.9277	6.41e-16	1.8e-15	3.05247	2.22115	1.79009	1.30086	0.10018	0.103293	0.70967	0.961881	0.100977	0.10017	1.83512	2.66846	0.106495	3.06767
992	-0.172309	-0.378205	-0.522493	-0.000974675	0.0848927	-0.442348	-1.46437	-1.90083	-0.210609	-1.71664	-3.1386	-3.92657	-2.67044	-4.12701	-5.06698	-6.1844	14.0464	76.9587	3.44e-20	1.22e-18	3.00483	2.29693	0.101372	1.71313	0.515691	0.103293	0.101026	1.26561	1.48812	0.678106	0.103274	2.65829	0.663173	0.101254
993	1.79789	2.69249	2.07452	-0.909507	0.0264183	2.79729	4.0831	4.74988	1.71186	4.7881	5.14985	4.42117	3.41617	4.67499	5.03886	3.9491	13.102	25.4123	4.43e-13	6.2e-13	3.10784	2.26413	1.69953	1.2432	0.880696	0.103293	0.185877	1.20746	1.37274	0.10017	1.49684	2.66653	0.885399	3.28479
994	0.223711	0.484947	0.320664	-0.29372	-0.113954	-0.064632	-0.00436556	-0.104622	0.231249	0.521704	0.509659	0.239601	1.00406	1.44719	1.423	0.757259	16.4482	9.50485	1.01e-07	1.07e-07	2.81679	2.07599	0.101372	1.0353	0.10018	0.103293	0.101026	0.101889	0.100977	0.10017	0.103274	2.57723	0.106495	0.398701
995	0.20413	0.297055	0.196424	-0.410981	-0.178805	-0.221289	-0.198398	-0.330998	0.0999616	0.40609	0.381951	0.095253	0.966854	1.41605	1.26354	0.644826	15.8518	8.32913	4.45e-07	4.6e-07	2.81763	2.05774	0.101372	0.100986	0.10018	0.103293	0.101026	0.101889	0.100977	0.10017	0.103274	2.57388	0.106495	0.515807
996	2.61315	1.69537	0.206565	-1.91043	1.56219	2.04586	1.6169	1.40626	3.03116	3.03021	1.46479	0.855466	3.61644	2.9773	1.28447	0.245454	12.347	21.3112	3.52e-12	4.35e-12	3.01468	2.20252	0.101372	0.591362	0.558245	0.103293	0.101026	1.32236	1.32895	0.956693	1.62317	2.64429	0.106495	2.89707
997	-0.491989	-0.224226	-0.0691286	-0.296282	-0.588536	-0.592331	-0.519647	-1.84416	-0.774	-1.37078	-2.761	-3.44903	-1.57115	-2.4254	-4.20361	-4.81573	15.235	58.0258	2.47e-18	2.46e-17	2.99046	2.23659	0.999889	0.714994	0.10018	0.103293	0.337516	1.29906	1.10902	0.10017	0.103274	2.63588	0.106495	0.101254
998	0.0497695	0.203172	0.235456	-0.430888	-0.336466	-0.306015	-0.217197	-0.332381	-0.0939395	0.321649	0.387801	0.039815	0.828486	1.34895	1.26887	0.52188	15.9922	8.32728	4.46e-07	4.61e-07	2.81148	2.07049	0.101372	0.133304	0.10018	0.103293	0.101026	0.101889	0.100977	0.10017	0.103274	2.57348	0.106495	0.101254
999	-0.42139	-0.246493	0.0825258	0.119475	-0.204795	-0.369454	-0.549569	-1.71845	-0.732883	-1.24334	-2.33875	-2.85742	-2.06055	-2.63374	-2.98272	-3.54126	16.4187	82.8409	1.16e-20	6.18e-19	2.99323	2.26316	0.830497	1.50162	0.10018	0.103293	0.101026	1.07044	1.36724	0.10017	0.103274	2.64537	0.106495	0.756006
1000	0.0170025	0.185601	0.1938	-0.47401	-0.373201	-0.322848	-0.262928	-0.398687	-0.0996619	0.281142	0.305426	-0.0266296	0.753658	1.25666	1.16068	0.428514	16.0452	7.66069	1.1e-06	1.14e-06	2.82033	2.07996	0.101372	0.122349	0.10018	0.103293	0.101026	0.101889	0.100977	0.10017	0.103274	2.57831	0.106495	0.101254
1001	2.9468	2.22367	1.66695	-2.37934	1.94051	2.73093	3.89157	2.37721	2.9474	4.29246	4.47682	2.15931	5.21126	5.6443	4.58794	2.1277	13.9854	34.8472	5.99e-15	1.26e-14	3.05572	2.20837	1.49066	0.283522	0.736779	0.103293	0.101026	1.19475	0.602222	0.10017	1.94978	2.66329	0.106495	3.12831
1002	3.36809	2.01469	1.44231	-2.72201	1.87322	2.36048	2.98738	2.17255	3.48681	4.21812	3.48384	1.92157	6.16707	5.74501	3.78919	1.15026	12.3321	32.7229	1.42e-14	2.66e-14	3.05421	2.25151	0.101372	1.70016	0.10018	0.879966	0.101026	1.45115	0.100977	0.10017	1.9323	2.6695	0.106495	3.1302
1003	2.7076	2.49381	1.25343	-4.69108	1.72554	2.60639	3.02829	2.34605	3.19659	4.16699	3.70017	2.09311	4.35971	4.24324	3.87448	1.69811	13.574	25.0908	5.26e-13	7.25e-13	3.08404	2.28262	1.36436	1.67035	0.829502	0.187165	0.101026	1.52727	1.39047	0.175629	1.92605	2.69969	0.707	3.20459
1004	2.62521	2.52177	1.22755	-1.81055	1.39463	2.60308	3.54386	4.09093	2.65649	4.67945	4.32094	3.43854	4.98123	5.44308	3.52355	2.03873	13.9972	38.9701	1.27e-15	3.28e-15	3.05922	2.24399	1.02791	1.10843	0.10018	0.103293	0.101026	1.21184	0.100977	0.10017	1.56448	2.66596	0.106495	3.11393
1005	-0.183694	2.30828	1.54491	-0.749953	0.199275	2.35797	3.65784	4.71145	0.808012	3.51996	4.57495	5.34568	0.0709888	1.56084	2.78401	4.3763	12.5774	36.2675	3.45e-15	7.96e-15	3.08803	2.18199	1.47022	1.89412	0.285937	0.103293	0.101026	0.301035	1.53386	0.10017	0.103274	2.56804	0.106495	3.13031
1007	0.81048	2.62975	1.9323	-1.06806	0.139859	2.40063	4.00109	5.49882	0.517479	4.41594	5.51343	5.53538	1.6096	3.30294	4.40672	4.94465	15.1132	69.1176	3.83e-19	5.87e-18	3.11404	2.23444	1.58542	1.41444	0.953586	0.103293	0.101026	1.26261	0.993583	0.10017	0.518425	2.60846	0.106495	3.26457
1008	0.0144043	0.767971	0.578359	-0.0413949	0.0885143	0.958704	1.62094	1.02391	0.14091	1.04283	1.39999	0.39328	-0.583847	-0.35306	-0.404629	-0.812105	14.1033	9.4137	1.13e-07	1.19e-07	3.02876	2.21258	1.40529	1.64053	0.10018	0.103293	0.101026	1.14566	1.32982	0.10017	0.527287	2.64036	0.106495	2.12445
1009	3.29658	3.39902	2.97552	-1.09227	2.44865	3.61914	4.58769	4.24829	3.60202	5.13314	5.54009	4.19141	5.38159	5.74502	6.27926	5.04753	13.5919	30.6037	3.57e-14	5.95e-14	3.09625	2.24804	1.67069	1.43026	1.12999	0.705325	0.339754	1.43236	1.43999	0.10017	1.85749	2.67006	0.106495	3.27437
1010	2.83167	1.76263	0.132188	-3.10235	1.76255	2.33079	2.32154	1.66394	3.22269	3.2766	2.40277	0.888607	4.7626	4.15362	2.75821	0.837555	14.1624	45.0364	1.68e-16	6.37e-16	3.02946	2.20233	0.294032	1.08575	0.236436	0.103293	0.804582	1.43191	1.16562	0.10017	1.76	2.65078	0.106495	3.0301
1011	-1.03166	-0.479829	0.183356	0.0432075	-0.696813	-0.518892	-0.252727	-1.8616	-1.09929	-1.56398	-2.46593	-3.5602	-2.90968	-2.74632	-4.00759	-5.35489	13.1814	34.2151	4.24e-15	9.28e-15	3.0032	2.2591	1.35629	0.513506	0.10018	0.103293	0.977894	1.24372	1.47401	0.10017	0.103274	2.66079	0.106495	0.101254
1012	2.01266	2.51961	1.04998	-1.81743	1.28484	2.35786	3.18219	2.8644	2.43379	3.92048	3.78624	1.98626	3.90799	4.07011	3.89491	1.6074	13.4249	28.3089	9.42e-14	1.46e-13	3.06501	2.23309	1.40077	1.38367	0.10018	0.11973	0.756185	1.35331	1.31389	0.934825	1.56806	2.68112	0.106495	3.12879
1014	2.03243	2.28004	1.77437	-2.63566	1.04038	2.58556	3.83427	4.04406	2.33478	4.48987	5.03348	3.56732	4.27349	5.48423	4.64554	2.6851	13.559	31.7735	2.13e-14	3.77e-14	3.06846	2.2065	1.63221	0.100986	0.166075	0.103293	0.101026	1.30299	0.721944	0.126031	1.65841	2.65966	0.589677	3.17905
1015	2.83162	2.50807	2.10552	-2.02399	1.62886	2.79568	3.83288	3.52084	2.70013	4.52173	4.8676	2.04733	5.04171	5.80519	4.20813	1.14144	13.0015	39.1516	1.19e-15	3.09e-15	3.06883	2.25491	1.51298	0.100986	0.10018	0.239549	0.101026	1.3247	0.23502	0.541071	1.86369	2.69897	0.106495	3.14819
1017	0.28233	0.352466	0.147472	0.0157298	0.0956602	0.00393539	-0.0832211	-0.457833	0.153034	0.0250388	-0.310847	-0.671424	0.160203	0.220616	0.279119	-0.238162	14.6464	2.14399	0.0344619	0.0344678	2.90724	2.1636	0.101372	1.41572	0.454073	0.103293	0.101026	0.101889	0.528671	0.10017	0.103274	2.61382	0.106495	1.12277
1019	3.49735	1.62003	1.29333	-3.71912	1.87836	2.50248	2.91854	1.86751	3.64964	3.92416	3.4758	1.24256	6.30944	5.76277	3.33086	1.01074	13.3003	47.4463	8.06e-17	3.47e-16	3.04542	2.21305	0.101372	1.34819	0.10018	0.592409	0.149536	1.12081	0.690675	0.10017	2.02258	2.66763	0.106495	3.12263
1020	2.30316	2.78681	0.73613	-1.61783	1.46374	2.72704	2.69574	3.8775	2.60319	4.3193	3.69699	3.8917	4.0583	3.87561	3.7821	4.2606	12.8071	23.2453	1.37e-12	1.78e-12	3.08573	2.19277	0.693887	1.6086	1.09534	0.680953	0.101026	1.20293	1.45834	0.819997	1.34575	2.65512	0.106495	3.24093
1021	0.0527194	0.227759	0.235724	-0.43816	-0.338163	-0.266903	-0.199638	-0.301789	-0.0734118	0.31346	0.41394	0.0786855	0.817223	1.32907	1.30884	0.576417	16.2277	9.21123	1.45e-07	1.52e-07	2.81216	2.06901	0.101372	0.410034	0.10018	0.103293	0.101026	0.101889	0.100977	0.10017	0.103274	2.57027	0.106495	0.101254
1022	-1.03215	-0.66047	0.00269436	-0.0458281	-0.727281	-0.630204	-0.708616	-2.29064	-1.29486	-1.83095	-2.99566	-4.67055	-3.35253	-3.40671	-4.83544	-6.40613	15.2977	66.437	6.75e-19	8.95e-18	2.9984	2.26913	1.20931	0.100986	0.10018	0.103293	0.101026	1.33207	1.57766	0.10017	0.103274	2.65261	0.106495	0.101254
1023	3.58166	2.15316	0.901899	-2.21492	2.66201	2.87681	3.13143	2.20296	3.81501	4.12786	3.18543	1.13333	5.84027	5.21903	3.34927	0.774732	13.6561	65.0646	4.05e-19	6.01e-18	3.03338	2.19281	0.356849	0.100986	0.10018	0.103293	0.462943	1.37829	1.05686	0.472202	1.99792	2.67899	0.574313	3.10289
1026	0.185928	0.518854	0.503744	-0.174195	-0.120464	-0.0212903	0.155719	0.0278353	0.211047	0.589659	0.744407	0.459492	1.07106	1.59302	1.68031	0.967609	16.1161	10.6574	2.69e-08	2.87e-08	2.81025	2.05491	0.101372	1.21194	0.10018	0.103293	0.101026	0.101889	0.100977	0.10017	0.103274	2.57114	0.106495	0.101254
1027	0.307261	0.47398	0.224971	-0.39233	-0.0109017	-0.0761552	-0.191121	-0.236757	0.306406	0.426281	0.334326	0.0685428	0.962997	1.27667	1.1397	0.555327	16.3255	7.76881	9.49e-07	9.77e-07	2.83078	2.08982	0.101372	0.98526	0.10018	0.103293	0.101026	0.101889	0.100977	0.10017	0.103274	2.59106	0.106495	0.52533
1028	1.11693	2.22608	0.635498	-2.32261	0.579171	2.19345	2.97409	4.70597	1.11828	3.98949	3.91831	3.88874	2.84088	3.57755	2.72007	2.69533	12.5069	32.4651	9.42e-15	1.86e-14	3.07397	2.22399	0.738945	0.100986	0.549546	0.103293	0.505494	1.04845	0.196179	0.10017	0.734816	2.64601	0.588485	3.14736
1029	3.34691	1.6968	0.531214	-2.12886	2.28298	2.32892	2.28007	1.29107	3.79802	3.08619	2.10631	-0.313515	5.54388	4.4914	3.17594	0.986727	12.8184	35.6651	4.34e-15	9.45e-15	3.0258	2.20444	0.101372	1.22975	0.10018	0.728349	1.00253	1.32487	1.42353	0.10017	1.97279	2.66023	0.106495	3.07894
1030	3.56575	2.34905	0.77615	-3.16956	2.24413	2.37234	2.64426	1.32802	4.10322	3.83996	2.55826	0.699767	5.69157	4.86882	2.95618	0.984184	12.3529	46.7339	4.96e-17	2.41e-16	3.0463	2.23048	0.101372	0.274325	0.661773	0.103293	0.101026	1.40853	1.19078	0.9338	2.07005	2.67784	0.106495	3.13689
1031	2.9134	2.92056	2.37303	-2.02665	1.8052	2.99582	4.32341	3.99803	3.2534	5.09828	5.40697	2.68731	5.78207	6.42856	5.37398	2.16115	13.6143	53.7752	1.37e-17	9.19e-17	3.06796	2.24421	1.50347	1.55619	0.10018	0.326921	0.683176	1.30836	0.100977	0.64656	1.78688	2.69266	0.106495	3.15155
1032	2.17537	2.39539	1.75352	-1.26306	1.20922	2.59347	3.74291	4.33915	2.47708	4.60348	5.14512	3.97758	4.58742	5.41126	4.67525	3.21573	14.3289	42.4689	3.82e-16	1.18e-15	3.07794	2.21461	1.4046	1.55051	0.10018	0.103293	0.101026	1.31216	0.120908	0.10017	1.45148	2.65642	0.106495	3.1475
1033	-0.266848	-0.0629178	-0.244549	-0.518588	-0.244453	-0.21991	-0.295614	-1.60466	-0.268637	-0.924212	-2.38384	-3.17915	-1.23461	-2.40855	-3.68281	-4.95494	13.4112	22.9005	1.78e-12	2.28e-12	2.96823	2.21016	0.970642	0.100986	0.688258	0.103293	0.101026	1.25944	1.01872	0.10017	0.103274	2.60722	0.742082	0.964395
1034	3.4593	3.13633	2.16666	-2.71391	2.60132	3.42329	3.98919	2.83193	3.89749	4.92654	4.5709	1.5856	6.36633	6.33081	5.09736	1.56978	12.8924	45.8388	1.31e-16	5.16e-16	3.05899	2.21047	1.24434	1.13755	0.10018	0.729886	0.101026	1.446	0.806728	0.956331	2.02124	2.68263	0.106495	3.18346
1035	3.97592	2.79679	1.01858	-6.02402	2.38941	3.04834	3.47238	3.21481	4.23329	4.78737	4.15666	2.36028	6.30028	5.95045	4.09569	2.4452	13.654	40.602	1.79e-15	4.4e-15	3.0471	2.21834	0.101372	1.2524	0.79881	0.103293	0.101026	1.33545	0.100977	0.134099	1.88666	2.66957	0.106495	3.12241
1036	0.0283382	0.130321	0.0863505	-0.564362	-0.350836	-0.372601	-0.344331	-0.568635	-0.115878	0.0427106	0.0435106	-0.29214	0.539035	0.939618	0.896188	0.184849	16.4557	6.26707	8.88e-06	9.08e-06	2.82966	2.08587	0.101372	0.528182	0.10018	0.103293	0.101026	0.101889	0.100977	0.10017	0.103274	2.57429	0.106495	0.101254
1038	0.0113208	-0.00603987	0.00370269	-0.640207	-0.358433	-0.514211	-0.543151	-0.864042	-0.169669	-0.210716	-0.326563	-0.673164	0.349715	0.654445	0.45846	-0.284962	15.9231	4.63865	0.000151837	0.000154222	2.85417	2.09927	0.101372	0.100986	0.10018	0.103293	0.101026	0.333806	0.100977	0.10017	0.103274	2.5881	0.106495	0.101254
1039	3.74278	2.50775	1.54538	-3.36005	2.52321	2.89878	3.10183	2.18915	4.14547	4.24647	3.57174	0.867268	6.42475	5.77312	3.4488	0.697982	13.9448	51.648	2.43e-17	1.4e-16	3.0302	2.22063	0.289606	1.34245	0.10018	0.857223	0.661716	1.39833	0.58687	0.10017	1.93805	2.6698	0.106495	3.08316
1041	0.0590702	0.177134	0.226812	-0.514018	-0.339898	-0.317748	-0.201019	-0.453719	-0.100046	0.217478	0.334259	-0.09127	0.694257	1.23931	1.17158	0.341783	15.9214	7.81771	8.87e-07	9.14e-07	2.81665	2.06949	0.101372	0.100986	0.10018	0.103293	0.101026	0.101889	0.100977	0.10017	0.103274	2.57348	0.106495	0.101254
1042	0.164249	0.321353	0.106154	-0.646732	-0.187776	-0.189786	-0.319159	-0.521343	0.127521	0.262448	0.224647	-0.213334	0.794496	1.16252	1.08534	0.371893	16.3313	8.49118	3.59e-07	3.73e-07	2.82385	2.08843	0.101372	0.612934	0.10018	0.103293	0.101026	0.101889	0.100977	0.10017	0.103274	2.56561	0.106495	0.422245
1043	2.58536	1.7166	0.509934	-1.99659	1.17815	2.40811	2.8352	2.40623	2.61334	3.76353	2.76813	1.78082	4.28612	4.11406	2.23363	1.19071	13.7941	28.1732	1.1e-13	1.68e-13	3.04401	2.22884	0.670968	1.07362	0.10018	0.103293	0.101026	0.79054	1.27612	0.10017	1.75034	2.66924	0.106495	3.04628
1044	2.76243	1.98464	0.89959	-2.34805	1.7229	2.44314	2.95816	2.31867	2.87992	3.87467	3.14504	1.74009	4.84177	4.5445	3.19975	1.5336	14.4583	49.6014	4.31e-17	2.21e-16	3.04563	2.22328	1.02214	0.100986	0.10018	0.305618	0.106581	1.24928	1.28936	0.10017	1.86212	2.66044	0.106495	3.10573
1045	-0.286557	-0.501918	-0.10453	0.092224	-0.147223	-0.295772	-0.759331	-1.93735	-0.511881	-1.32226	-2.51758	-3.36982	-2.52979	-3.01658	-3.88483	-3.94433	14.9421	52.2962	1.3e-17	8.91e-17	2.98403	2.22503	0.666802	0.100986	0.566414	0.103293	0.101026	0.956737	1.59232	0.10017	0.103274	2.63149	0.106495	1.19468
1046	0.853491	2.28562	0.302825	-2.03225	-0.162543	2.52698	2.44873	3.83952	0.891336	3.65411	2.99261	4.03538	1.31482	1.6144	2.326	3.52269	12.474	14.1781	8.57e-10	9.45e-10	3.09894	2.23596	0.101372	1.79463	0.10018	0.103293	0.739061	1.33298	1.51973	0.10017	0.103274	2.62323	0.106495	3.23238
1047	1.94341	2.47541	0.76183	-2.35913	0.991108	2.55439	3.09291	4.08187	1.99585	4.20804	3.85621	3.9141	3.65978	3.90464	3.317	3.66833	14.9241	30.8056	3.26e-14	5.49e-14	3.0829	2.21859	0.78002	1.43267	0.798627	0.103293	0.101026	1.21799	1.19532	0.10017	1.172	2.64955	0.106495	3.20137
1048	0.131062	0.169416	-0.0604934	0.0807929	0.0092195	-0.0542436	-0.263157	-0.48673	0.0551595	-0.0405605	-0.658176	-0.916644	-0.243609	-0.082095	-0.129076	-0.378336	14.3939	2.36468	0.0199078	0.0199239	2.92769	2.17974	0.101372	1.45196	0.10018	0.103293	0.101026	0.101889	0.944538	0.10017	0.103274	2.61844	0.106495	1.23046
1049	3.12432	2.15866	1.32654	-2.25772	1.99781	2.69312	3.3787	2.35919	3.4055	4.37195	3.90273	1.79245	5.64191	5.6513	3.9489	1.23673	14.2713	49.5093	4.42e-17	2.23e-16	3.0237	2.17391	1.06163	1.25527	0.10018	0.103293	0.101026	1.25397	0.587918	0.10017	1.89122	2.64013	0.106495	3.07927
1051	2.71319	1.7321	0.0959275	-5.17675	1.65398	2.26582	2.37975	1.95303	2.8953	3.39615	2.1412	1.11804	4.85841	4.27991	2.70267	1.3617	13.7325	41.0546	6.14e-16	1.75e-15	3.04529	2.22803	0.101372	0.100986	0.10018	0.103293	0.495307	1.40286	1.36795	0.10017	1.88555	2.67254	0.106495	3.12899
1052	0.0373861	0.670796	0.308151	-0.554096	-0.21473	0.228011	0.83015	0.0760269	0.0346327	0.499399	-0.340378	-1.4512	-0.389557	-0.81988	-1.90101	-2.89103	13.1992	12.5162	3.08e-09	3.35e-09	3.0196	2.29674	1.18625	1.64063	0.10018	0.103293	0.101026	1.24815	0.23702	0.10017	0.103274	2.66983	0.106495	1.35788
1053	-0.454083	-0.165905	-0.28284	0.273617	0.233446	0.00605245	-0.613603	-1.74173	-0.326805	-1.15443	-2.5829	-3.96852	-2.4536	-3.53332	-4.65491	-6.50021	14.4269	58.4678	2.34e-18	2.34e-17	3.00659	2.28665	0.826689	1.55168	0.10018	0.103293	0.101026	1.36803	1.56744	0.10017	0.103274	2.66356	0.760682	1.13636
1055	-1.00021	-0.87562	0.0237902	0.0253652	-0.85596	-0.731541	-0.8558	-2.28032	-1.47431	-2.06357	-3.12274	-3.27893	-3.62195	-3.61892	-4.33176	-4.2541	14.4914	49.0958	4.11e-17	2.14e-16	2.98938	2.25326	1.03705	0.100986	0.134406	0.103293	0.101026	0.456685	1.64172	0.10017	0.103274	2.63811	0.106495	0.101254
1056	0.846082	2.18326	0.549879	-0.99045	0.280526	2.1963	2.86962	3.60376	1.10103	3.37787	3.14911	3.16113	0.763023	1.41341	1.56297	2.30718	14.5655	24.357	7.83e-13	1.05e-12	3.06581	2.23419	0.992258	1.20793	0.643364	0.103293	0.101026	1.36672	1.24865	0.10017	0.103274	2.62536	0.106495	3.05729
1057	-0.655959	-0.615826	-0.127426	0.00843614	-0.421386	-0.554625	-0.855822	-2.18433	-0.939785	-1.71793	-2.95013	-3.73485	-2.85795	-3.45834	-4.70529	-5.1097	17.0039	98.3654	2.36e-21	2.44e-19	2.99204	2.2637	0.876789	0.513914	0.10018	0.103293	0.101026	1.21614	1.53135	0.10017	0.103274	2.64687	0.106495	0.689127
1058	0.152986	0.438173	0.415889	-0.231373	-0.173457	-0.0881208	0.0471732	-0.075632	0.101773	0.459795	0.590019	0.29369	0.923593	1.44146	1.47962	0.718886	16.365	9.24455	1.39e-07	1.46e-07	2.82264	2.07394	0.101372	1.09262	0.10018	0.103293	0.101026	0.101889	0.100977	0.10017	0.103274	2.58318	0.106495	0.101254
1059	0.876468	2.62489	0.606992	-1.74812	-0.372952	2.5514	3.10197	4.4198	1.12402	4.14309	3.52708	4.47049	1.07571	2.1902	2.32398	4.07544	14.013	28.8168	8.1e-14	1.27e-13	3.08854	2.21422	0.101372	1.38303	0.10018	0.103293	0.101026	1.10991	1.385	0.10017	0.103274	2.5943	0.106495	3.19688
1060	-0.194123	-0.339384	-0.385968	0.187759	0.126318	-0.0858351	-0.783883	-1.59934	-0.256871	-1.06397	-2.4901	-3.31156	-2.36639	-3.40044	-4.30317	-4.60529	15.287	49.6658	4.23e-17	2.2e-16	3.00513	2.2615	0.203661	1.47454	0.10018	0.103293	0.101026	1.23932	1.57117	0.10017	0.103274	2.65484	0.106495	1.25745
1061	2.63441	2.36112	1.08512	-1.42547	1.54505	2.67537	3.13592	2.90736	2.82627	4.07696	3.72644	1.97345	4.28009	4.57089	2.89884	0.525849	13.6609	35.041	4.39e-15	9.49e-15	3.03881	2.24065	1.29423	1.30582	0.10018	0.103293	0.101026	1.47452	0.277459	0.10017	1.58023	2.65937	0.106495	2.98969
1062	-0.706726	-0.27114	0.327702	0.200837	-0.356726	-0.325192	-0.336641	-1.97088	-0.951942	-1.33426	-2.56819	-3.73253	-2.72658	-3.10196	-4.13092	-5.708	15.4966	45.0091	1.69e-16	6.42e-16	3.01086	2.28452	1.2419	1.50846	0.10018	0.103293	0.101026	1.2976	1.51279	0.156907	0.103274	2.66221	0.106495	0.101254
1063	1.75022	2.49145	0.767706	-1.8318	0.668969	2.37587	2.95834	3.55499	2.13241	4.21536	3.72658	3.01807	3.73336	3.79364	3.54149	2.79353	13.6353	19.4479	1.53e-11	1.8e-11	3.10037	2.31555	1.18576	1.41692	0.859032	0.103293	0.729377	1.44176	1.17111	0.355759	1.3593	2.70213	0.106495	3.23487
1064	-0.914768	-0.895229	-0.18593	0.158271	-0.470131	-0.737207	-1.24974	-2.6531	-1.24416	-2.09044	-3.34798	-4.24802	-3.79753	-4.09111	-5.42684	-6.26197	15.266	81.7672	3.41e-20	1.22e-18	2.99829	2.29346	0.796577	0.617398	0.10018	0.103293	0.101026	1.1672	1.68636	0.247978	0.103274	2.661	0.106495	0.101254
1066	0.197655	0.5752	0.397865	-0.154432	-0.082148	-0.00239755	0.0454045	-0.0621418	0.196868	0.474321	0.463102	0.211709	0.821351	1.24841	1.36395	0.679353	15.9763	6.54176	5.75e-06	5.9e-06	2.83632	2.10689	0.101372	1.41912	0.10018	0.103293	0.101026	0.101889	0.100977	0.10017	0.103274	2.59023	0.106495	0.243409
1067	1.609	2.37982	2.00132	-1.93642	0.865147	2.56677	3.8451	4.62267	1.74152	4.3504	4.99208	3.94538	3.89349	5.11172	3.91038	2.73206	13.4483	40.8161	4.46e-16	1.34e-15	3.04627	2.18134	1.41114	0.100986	0.10018	0.103293	0.101026	1.02694	0.100977	0.10017	1.18159	2.62768	0.106495	3.03687
1068	0.374743	2.71356	2.80024	-0.150405	-0.304598	2.24021	4.4328	6.41516	-0.497172	4.52228	6.14768	6.52713	1.06813	3.28282	5.03379	6.01475	13.6763	66.4708	6.7e-19	8.94e-18	3.13162	2.21601	1.77174	1.3393	0.915632	0.103293	0.101026	0.604565	1.41492	0.411142	0.592117	2.60015	0.106495	3.29842
1069	-0.481973	1.16017	0.032307	-0.304966	-0.323797	1.16965	1.49912	1.54047	-0.0655255	1.33821	0.738489	-0.24228	-0.99876	-1.11015	-1.11453	-1.77324	12.3216	14.072	9.08e-10	9.99e-10	3.03571	2.28481	1.25663	0.100986	0.10018	0.103293	0.3741	1.18761	1.51835	0.10017	0.103274	2.66996	0.759883	2.38363
1072	0.222647	1.43937	0.709884	-0.578559	0.148659	1.41032	2.43311	2.87278	0.429442	2.44656	2.33031	1.59614	0.29092	0.857784	0.720676	0.42646	13.7522	19.4111	1.57e-11	1.84e-11	3.04514	2.24035	1.23938	0.100986	0.10018	0.236554	0.101026	1.16141	1.22119	0.10017	0.103274	2.64168	0.106495	2.77485
1073	-0.210284	-0.694724	-0.368162	0.124159	-0.00330488	-0.527505	-1.46563	-2.18528	-0.464328	-1.98124	-3.15486	-3.59935	-2.63178	-3.86907	-4.20236	-4.94207	16.1832	123.725	3e-23	1.46e-20	2.99647	2.27051	0.101372	1.48191	0.624614	0.103293	0.101026	1.28348	1.56221	0.10017	0.103274	2.64997	0.106495	0.101254
1075	2.9993	2.54958	1.20422	-3.0484	1.63662	2.61805	2.9675	3.40818	3.12881	4.19117	3.87126	3.14384	5.17806	5.01806	4.05689	2.17039	12.3676	26.9281	1.92e-13	2.81e-13	3.08147	2.27302	0.1413	1.90066	0.10018	0.103293	0.101026	1.45161	0.100977	0.10017	1.71866	2.69792	0.106495	3.12755
1076	-0.543625	-0.929721	-0.31774	0.262769	-0.310104	-0.716053	-1.5373	-2.02025	-0.937964	-2.29306	-2.98839	-2.82026	-3.15676	-3.84459	-3.47473	-3.63201	14.9528	80.0618	1.92e-20	8.17e-19	3.00624	2.28679	0.101372	1.69706	0.10018	0.103293	0.101026	1.04529	1.66042	0.10017	0.103274	2.66327	0.106495	0.101254
1077	2.28851	1.8368	0.746046	-2.95069	1.09175	2.18086	2.80135	3.02923	2.37323	3.70985	3.40218	2.89173	3.92552	3.92793	3.66732	3.17277	13.4023	21.795	3.43e-12	4.25e-12	3.08105	2.23765	1.30688	0.100986	1.08359	0.103293	0.101026	1.29869	1.42294	0.109228	1.76997	2.67735	0.106495	3.22353
1078	3.19355	4.67777	3.9985	0.524478	1.86968	4.27277	5.64617	6.62704	2.7721	6.33212	6.8819	6.14798	4.3056	6.08094	7.19003	6.1962	12.3003	22.9344	1.75e-12	2.24e-12	3.13612	2.31275	1.81311	1.55397	1.05706	0.103293	0.889481	1.40351	1.55327	0.10017	1.32164	2.69333	0.674914	3.32726
1079	-0.469475	-0.664251	-0.0470759	0.0626481	-0.2368	-0.546557	-0.946893	-2.29219	-0.804224	-1.80926	-2.8676	-3.55599	-2.8473	-3.35096	-4.14034	-4.38526	16.0833	100.74	6.4e-22	1.03e-19	2.97507	2.23554	0.841201	0.5984	0.714527	0.103293	0.101026	1.04136	1.55321	0.10017	0.103274	2.62481	0.106495	0.101254
1080	0.0634899	0.119423	-0.456468	-0.833774	-0.338471	-0.601164	-0.872824	-1.41012	-0.0522614	-0.817452	-2.01227	-2.29812	-0.410068	-1.40272	-2.12767	-2.64622	14.8381	15.8126	2.18e-10	2.45e-10	2.97206	2.24543	0.101372	1.26409	0.10018	0.103293	0.101026	1.30411	0.139239	0.10017	0.103274	2.63494	0.106495	0.886756
1081	1.34191	2.92184	1.12153	-0.494982	0.982789	2.95076	3.26287	4.62984	1.67929	3.95949	3.97053	4.97911	1.05622	1.50106	2.55608	4.55369	14.0673	31.2866	2.64e-14	4.55e-14	3.11417	2.23845	0.86166	1.71426	1.10238	0.103293	0.101026	1.2351	1.49686	0.10017	0.103274	2.62391	0.106495	3.22506
1082	-0.300693	-0.62563	-0.300035	0.118433	-0.138745	-0.57548	-1.37714	-2.05539	-0.621327	-1.88643	-2.95148	-3.37391	-2.64455	-3.63477	-3.7102	-4.64585	16.21	121.82	3.78e-23	1.72e-20	3.00057	2.2885	0.101372	1.47634	0.54432	0.103293	0.101026	1.21267	1.5172	0.10017	0.103274	2.66347	0.106495	0.101254
1083	2.41999	2.21958	0.474248	-2.04122	1.42453	2.5739	2.68829	2.98689	2.65323	3.75777	3.22144	3.09362	4.31261	4.26973	3.37001	3.11596	13.874	20.8891	6e-12	7.22e-12	3.06827	2.21593	0.101372	1.79295	0.159612	0.103293	0.101026	1.14384	1.09732	0.10017	1.57012	2.65428	0.106495	3.10646
1084	2.67306	2.42916	1.65336	-1.95453	1.60734	2.79252	3.82975	3.75945	2.88027	4.66713	4.62907	2.92119	4.97086	5.60529	4.2052	2.23861	13.5863	32.0159	1.92e-14	3.47e-14	3.06542	2.24417	1.41501	0.100986	0.416263	0.103293	0.101026	1.41212	0.100977	0.10017	1.74574	2.68055	0.106495	3.1467
1085	-0.635069	2.62896	2.39062	-0.333521	-0.256946	2.47537	4.56721	5.75559	-0.165569	4.32071	5.79463	5.23423	0.2352	2.77514	4.02917	3.9731	13.7656	39.848	9.31e-16	2.47e-15	3.11839	2.28774	1.81706	1.53241	0.10018	0.103293	0.166945	1.35217	1.38275	0.10017	0.103274	2.65607	0.106495	3.23873
1086	-0.765636	-0.758048	-0.16153	0.00625691	-0.527995	-0.611114	-0.983283	-2.37486	-1.0877	-1.91193	-3.10583	-4.20103	-3.26153	-3.63187	-5.13664	-5.988	16.0978	76.4697	8.96e-20	2.38e-18	2.99471	2.26785	0.932981	0.100986	0.10018	0.103293	0.101026	1.33168	1.6043	0.10017	0.103274	2.65319	0.106495	0.600571
1087	0.193178	0.415519	0.0572656	-0.476817	-0.130369	-0.158311	-0.246425	-0.582214	0.178041	0.100667	-0.257616	-0.564826	0.475103	0.588034	0.466137	-0.122955	15.9279	4.0365	0.0004965	0.000500036	2.86736	2.14425	0.101372	1.33661	0.10018	0.103293	0.101026	0.350229	0.100977	0.10017	0.103274	2.59769	0.106495	0.818923
1088	2.73608	2.31072	2.37822	-0.369451	1.83556	2.77165	4.47056	3.6476	2.43266	4.54849	5.18922	3.01007	4.57352	5.86967	4.51113	1.56865	13.0188	31.8717	2.05e-14	3.68e-14	3.05379	2.21129	1.69078	1.31051	0.10018	0.103293	0.101026	0.945411	0.123463	0.10017	1.7497	2.65832	0.106495	3.00125
1090	2.03173	2.86666	0.746811	-2.03551	0.73997	2.85669	3.58591	4.67173	1.91129	4.78895	3.75784	4.38194	4.05007	4.4579	3.32874	4.13147	13.1516	25.0583	5.35e-13	7.34e-13	3.07152	2.20813	0.101372	0.990656	0.221857	0.103293	0.101026	0.734802	1.36006	0.10017	1.11665	2.63834	0.106495	3.19267
1091	2.26589	2.46087	1.14224	-1.95822	0.987407	2.58685	3.1321	2.94082	2.51072	4.09034	3.65322	2.06429	3.34261	3.78669	3.13919	1.23252	13.8272	23.2384	1.47e-12	1.9e-12	3.06961	2.27277	1.46565	1.45333	0.10018	0.103293	0.101026	1.39972	1.42948	0.619132	1.63536	2.69119	0.531115	3.13952
1092	2.48275	1.15018	-0.363244	-1.75081	1.58576	1.61787	1.34913	0.540701	2.65352	2.2543	0.490197	-1.24296	3.55401	2.69746	0.672426	-1.80264	13.3825	38.0213	1.14e-15	2.98e-15	3.01343	2.23541	0.101372	0.458922	0.10018	0.173289	0.711324	1.43298	1.36358	0.10017	1.70396	2.66116	0.106495	2.84027
1093	1.92631	2.17315	1.64091	-1.75137	0.81204	2.55411	3.66228	3.45327	1.78661	4.13205	4.57588	2.83546	4.14756	5.09769	4.78994	2.91029	13.748	40.0802	8.59e-16	2.31e-15	3.09267	2.25465	1.69298	0.100986	0.674377	0.103293	0.612472	1.41672	1.11394	0.10017	1.7763	2.69581	0.106495	3.22048
1094	2.56195	1.87288	0.783031	-0.384309	1.81797	2.41344	2.53777	0.665759	2.99631	3.07619	2.04563	-0.657541	3.37698	2.71744	1.20842	-1.58136	13.6942	32.4904	1.06e-14	2.06e-14	3.02995	2.26177	1.29272	1.0557	0.294079	0.421188	0.101026	1.3953	1.47443	0.10017	1.8023	2.67933	0.106495	2.79532
1095	-0.321492	0.215508	0.11616	-0.580217	-0.468529	-0.342866	-0.150351	-1.22366	-0.506959	-0.610454	-1.60221	-2.00577	-0.607229	-1.13986	-1.66394	-2.33215	14.6737	17.3859	4.39e-11	5.04e-11	2.97416	2.25361	0.856711	1.53664	0.10018	0.103293	0.101026	1.17718	0.256661	0.10017	0.103274	2.6409	0.106495	0.101254
1096	1.73383	2.04288	1.13504	-2.52592	0.487874	2.07617	2.93246	3.4367	1.25068	3.64554	3.49011	2.58766	3.4633	3.99999	2.42775	1.83966	12.7739	27.2224	1.03e-13	1.59e-13	3.02521	2.22071	1.11884	0.100986	0.10018	0.103293	0.462409	0.81118	0.790115	0.10017	1.17874	2.61884	0.106495	2.93689
1097	-0.361848	0.231891	0.387689	0.0447075	-0.181845	-0.125803	0.204184	-1.23625	-0.524665	-0.626133	-1.66897	-2.68279	-1.3454	-2.03275	-2.89871	-3.74448	15.2141	37.7976	1.94e-15	4.74e-15	2.99438	2.24331	1.17986	1.58372	0.10018	0.103293	0.101026	1.20513	1.14047	0.10017	0.103274	2.64446	0.106495	0.940982
1098	3.26386	2.97231	1.39435	-2.7057	1.94104	3.35549	3.26297	4.12908	3.13948	4.58311	3.66248	3.48874	5.45461	5.1375	3.60235	3.5259	12.2903	20.9075	5.94e-12	7.14e-12	3.06522	2.25724	0.101372	0.466705	1.03647	0.929451	0.101026	1.32827	1.16405	0.10017	1.55717	2.6695	0.106495	3.20403
1099	-0.673372	-0.574184	-0.125311	-0.149632	-0.540781	-0.575316	-0.762993	-2.11991	-0.983974	-1.65107	-2.9073	-3.89184	-2.61076	-3.17211	-4.5942	-5.2587	16.1704	76.7928	8.43e-20	2.32e-18	2.9819	2.24637	1.00156	0.100986	0.10018	0.103293	0.101026	1.31189	1.44649	0.10017	0.103274	2.63631	0.106495	0.665457
1100	0.0628463	0.235921	0.274248	-0.45567	-0.33035	-0.283093	-0.131098	-0.335296	-0.0627432	0.343533	0.440958	0.0846672	0.820951	1.36649	1.3172	0.511198	15.9659	8.69112	2.78e-07	2.9e-07	2.81313	2.0688	0.101372	0.106133	0.10018	0.103293	0.101026	0.101889	0.100977	0.10017	0.103274	2.57533	0.106495	0.101254
1101	-0.66962	-0.77402	-0.287209	-0.104548	-0.543805	-0.759686	-1.16432	-2.30716	-1.06003	-2.01096	-3.14783	-3.96557	-2.86959	-3.46267	-4.58034	-5.11192	16.1998	105.242	3.34e-22	7.07e-20	2.98936	2.26746	0.681446	0.100986	0.10018	0.103293	0.101026	1.27649	1.49684	0.10017	0.103274	2.64469	0.106495	0.101254
1102	-0.840654	0.00941982	0.594817	0.274688	-0.313153	0.303988	0.627735	-0.39659	-0.83966	-0.455869	-1.05584	-2.43562	-2.81557	-2.48979	-2.27682	-3.82076	13.1723	17.4826	6.07e-11	6.95e-11	3.02077	2.28774	1.53124	0.100986	0.364786	0.103293	0.101026	1.38346	1.61411	0.10017	0.103274	2.67174	0.106495	1.32188
1103	1.56921	2.39117	1.0954	-1.33026	0.838342	2.45268	3.01989	3.89071	1.62636	3.79268	4.01946	4.26919	2.63511	2.92151	3.6721	4.00105	14.678	24.9133	5.78e-13	7.91e-13	3.11192	2.25799	1.3656	1.85655	0.93153	0.103293	0.101026	1.29867	1.49054	0.10017	1.11192	2.6511	0.106495	3.22572
1104	-0.399595	-0.724231	-0.326115	0.0477997	-0.298518	-0.666531	-1.21338	-1.76195	-0.707175	-1.78343	-2.5292	-2.63459	-2.40133	-2.64659	-2.60599	-2.66231	16.8369	88.1033	4.67e-21	3.74e-19	2.96866	2.23439	0.101372	0.912943	0.10018	0.103293	0.101026	1.0013	1.46397	0.10017	0.103274	2.63001	0.106495	0.683484
1106	0.191237	0.355031	0.559393	-0.258783	-0.207842	-0.151305	0.12004	-0.00721623	0.118485	0.665861	0.978454	0.509683	1.23524	1.90467	1.88613	1.10042	15.4852	13.4745	1.61e-09	1.76e-09	2.78267	1.99249	0.101372	0.100986	0.10018	0.103293	0.101026	0.101889	0.100977	0.10017	0.103274	2.54168	0.106495	0.101254
1107	0.189547	-0.0726747	-0.566927	-0.815051	-0.219272	-0.470869	-0.786499	-1.27385	0.112335	-0.673766	-1.49991	-1.94086	-0.1569	-0.760278	-1.62189	-1.84824	14.4023	9.76408	7.44e-08	7.86e-08	2.9472	2.18072	0.101372	0.100986	0.10018	0.103293	0.101026	1.20378	0.100977	0.10017	0.103274	2.61271	0.106495	1.03824
1108	-0.660656	-0.679675	-0.0288207	0.116333	-0.356835	-0.506272	-1.01721	-2.43845	-0.917351	-1.91165	-3.1576	-4.56686	-3.17453	-3.59278	-4.91359	-6.33124	15.6884	76.7108	8.57e-20	2.35e-18	2.9921	2.27224	0.952247	0.100986	0.627493	0.103293	0.101026	1.31792	1.60682	0.10017	0.103274	2.64721	0.106495	0.101254
1110	-0.108387	-0.211409	0.275469	0.222391	0.135536	-0.0508613	-0.428699	-1.48428	-0.300145	-1.27185	-1.86986	-2.36857	-1.74527	-2.78995	-2.78995	-3.45615	12.983	29.8254	2.91e-14	4.96e-14	2.97689	2.2217	0.814695	0.844873	0.10018	0.695695	0.101026	0.8513	1.32292	0.901858	0.103274	2.62199	0.106495	0.757341
1111	-0.357591	0.285749	0.167589	0.00963708	-0.0313887	0.394666	0.511466	-0.643116	-0.240169	-0.155509	-0.933456	-2.26881	-1.55737	-2.55018	-2.54991	-4.23087	12.2297	12.614	3.6e-09	3.9e-09	3.01452	2.27412	1.37858	0.417045	0.926836	0.103293	0.909728	1.30433	1.56693	0.10017	0.103274	2.66054	0.310595	1.43391
1112	-0.690542	-0.3106	0.261932	0.241129	-0.247539	-0.299461	-0.584985	-2.10036	-0.873832	-1.51611	-2.56033	-4.04554	-3.04564	-3.58919	-4.65971	-6.73984	15.3598	57.9414	4.76e-18	4e-17	3.01902	2.3204	1.21341	1.4168	0.774635	0.103293	0.101026	1.33988	1.588	0.10017	0.103274	2.67748	0.106495	0.101254
1113	-0.291602	-0.820776	-0.486799	0.117569	0.047712	-0.55011	-1.57718	-2.25974	-0.498202	-2.1325	-3.32218	-3.94065	-3.06554	-4.32815	-4.9266	-5.99077	15.6156	94.7625	2.69e-21	2.69e-19	2.99688	2.27288	0.101372	1.45407	0.61185	0.103293	0.101026	1.34086	1.63657	0.10017	0.103274	2.65284	0.149058	0.101254
1114	-0.297083	-0.521423	-0.133613	0.0505146	-0.219744	-0.487281	-0.888513	-1.3008	-0.55125	-1.46309	-1.83531	-1.76554	-2.11828	-2.01001	-1.55608	-1.96948	15.5934	27.4247	9.34e-14	1.45e-13	2.96309	2.22481	0.101372	1.24927	0.152263	0.103293	0.101026	0.596993	1.36046	0.10017	0.103274	2.62913	0.217183	0.101254
1115	-0.407332	-0.788596	-0.542116	-0.139593	-0.360041	-0.771502	-1.4449	-2.21812	-0.684151	-1.98045	-3.25575	-3.7644	-2.51703	-3.32394	-4.56557	-4.86888	16.3721	96.7867	2.36e-21	2.44e-19	2.98424	2.25639	0.101372	0.100986	0.10018	0.103293	0.101026	1.33269	1.46178	0.10017	0.103274	2.64301	0.106495	0.561473
1116	-0.475171	-0.586867	-0.470212	0.21047	-0.105062	-0.364496	-1.32777	-2.53084	-0.455017	-2.03995	-3.15338	-4.40485	-2.86359	-3.99415	-4.69221	-6.35833	14.554	53.7161	1.39e-17	9.29e-17	3.0013	2.27078	0.720411	1.37496	0.10018	0.103293	0.639231	1.3383	1.69984	0.149487	0.812544	2.65935	0.106495	0.84824
1117	-0.518228	-0.929272	-0.528252	-0.0397416	-0.373974	-0.828995	-1.50794	-2.29193	-0.813901	-2.1996	-3.37862	-3.83067	-2.92611	-3.80283	-4.8827	-4.92149	16.2635	101.31	1.04e-21	1.42e-19	2.98691	2.25623	0.101372	0.261996	0.10018	0.103293	0.101026	1.30688	1.55273	0.10017	0.103274	2.64891	0.106495	0.101254
1118	-0.920034	-0.687362	0.137965	-0.0172669	-0.690773	-0.607513	-0.575879	-2.15875	-1.29673	-1.86296	-2.79146	-3.68795	-3.2957	-3.2128	-4.38631	-4.83885	15.473	79.674	2.06e-20	8.44e-19	2.98277	2.22925	1.15034	0.100986	0.10018	0.103293	0.101026	1.10089	1.57204	0.10017	0.103274	2.63084	0.106495	0.101254
1119	0.0407558	-0.228932	-0.240123	-0.0183952	0.287965	-0.257656	-1.13909	-1.88627	-0.00847728	-1.45451	-2.78793	-3.82422	-1.45926	-2.83599	-3.32395	-4.44458	13.8128	35.8907	2.49e-15	5.92e-15	2.99102	2.26982	0.101372	1.32277	0.10018	0.90102	0.101026	1.2704	1.32195	0.10017	0.103274	2.65212	0.106495	0.921704
1120	1.64578	2.25295	1.64234	-1.86622	0.421203	2.4606	3.5915	4.08516	1.65164	4.21379	4.53688	3.55915	3.45389	4.39211	4.25265	3.06574	14.6762	38.8727	1.31e-15	3.38e-15	3.09648	2.2527	1.59019	1.2313	0.10018	0.103293	0.311508	1.29663	1.36657	0.10017	1.40986	2.67528	0.106495	3.22772
1121	-0.636234	-0.583278	-0.0741144	0.142498	-0.321749	-0.426504	-0.796635	-2.16599	-0.908549	-1.57088	-2.80249	-3.7119	-2.99775	-3.42601	-4.47891	-4.51709	16.1758	62.2838	1.7e-18	1.87e-17	2.98695	2.24918	0.877227	0.920766	0.10018	0.103293	0.101026	1.13306	1.61514	0.10017	0.103274	2.63935	0.106495	1.04148
1123	-0.546978	-0.779923	-0.84788	-0.196993	-0.0923208	-0.518196	-1.51142	-2.37103	-0.433087	-2.19555	-3.41881	-4.09058	-3.19149	-4.93267	-5.04608	-6.3696	13.5452	52.9311	8.2e-18	6.09e-17	2.99154	2.26272	0.101372	1.3616	0.10018	0.103293	0.746734	1.3354	1.65193	0.10017	0.103274	2.64102	0.808847	0.101254
1124	-0.432659	-0.857677	-0.146437	0.000143337	-0.357678	-0.694286	-1.0363	-1.54423	-0.687733	-1.88001	-2.19844	-2.23733	-2.27882	-2.36772	-2.14609	-2.04856	15.4738	37.3527	1.22e-15	3.17e-15	2.95148	2.15152	0.101372	0.551953	0.10018	0.103293	0.101026	0.868277	1.43273	0.10017	0.553882	2.6091	0.106495	0.101254
1125	-0.380687	-0.724115	-0.31466	0.0766894	-0.203204	-0.619792	-1.29172	-1.91186	-0.629524	-1.8974	-2.75794	-2.88873	-2.57318	-3.17723	-3.13911	-3.28803	16.85	126.448	2.17e-23	1.23e-20	2.98106	2.2454	0.101372	1.35985	0.10018	0.103293	0.101026	1.16383	1.50934	0.10017	0.103274	2.63797	0.106495	0.1521
1126	-0.296043	-0.803233	-0.192593	0.134513	-0.15234	-0.670013	-1.14667	-1.68512	-0.611496	-1.79873	-2.23858	-2.35654	-2.54655	-2.46646	-2.17463	-2.34481	15.6284	45.1634	8.11e-17	3.49e-16	2.95774	2.19994	0.101372	0.148785	0.615565	0.103293	0.101026	0.894214	1.49951	0.10017	0.103274	2.61922	0.106495	0.101254
1127	-1.01118	-0.579064	0.118137	-0.0423831	-0.584404	-0.496477	-0.515311	-2.12563	-1.20281	-1.7781	-2.66828	-4.7169	-2.95652	-3.24074	-4.08282	-5.84179	13.6995	43.02	1.78e-16	6.64e-16	2.99221	2.28127	1.2767	0.498575	0.10018	0.668201	0.101026	1.32746	1.5561	0.10017	0.103274	2.63211	0.106495	0.101254
1128	-0.849516	-0.84176	0.0511504	0.0829045	-0.674121	-0.694116	-0.711458	-1.61835	-1.32845	-1.8206	-2.35717	-2.26508	-3.02826	-2.59915	-2.42915	-2.52095	15.4275	40.268	4.31e-16	1.31e-15	2.97963	2.2325	0.71986	0.757085	0.10018	0.103293	0.101026	0.410668	1.53526	0.10017	0.103274	2.63859	0.106495	0.101254
1129	1.13649	2.5648	-0.0656951	-1.43369	0.673115	2.71295	2.4003	3.49864	1.83224	3.49864	2.21789	3.42528	0.790642	1.0098	1.14951	2.89951	12.8173	15.7293	2.33e-10	2.62e-10	3.08111	2.29407	0.378508	1.14265	1.10464	0.20329	0.101026	1.26807	1.60776	0.10017	0.103274	2.62578	0.106495	3.13816
1130	-0.462383	-0.856258	-0.329643	0.114918	-0.231863	-0.666589	-1.36182	-1.9818	-0.730471	-2.03268	-2.91932	-3.07115	-2.82089	-3.45826	-3.52369	-3.69034	16.5546	133.955	9.15e-24	7.58e-21	2.98525	2.24923	0.101372	1.36565	0.10018	0.103293	0.101026	1.20572	1.56284	0.10017	0.103274	2.64714	0.106495	0.101254
1131	0.372297	-0.103994	-0.268592	0.0881787	0.521004	-0.122228	-1.11499	-1.7213	0.357746	-1.25175	-2.55307	-3.03619	-1.47695	-3.04449	-3.25765	-3.88758	14.0012	39.5838	5.47e-16	1.59e-15	2.98316	2.23178	0.101372	1.31411	0.99308	0.170145	0.101026	1.17043	1.3754	0.10017	0.724778	2.63298	0.106495	0.98108
1132	-0.586189	-0.528908	-0.071928	0.0649309	-0.311044	-0.545486	-0.837376	-2.16942	-0.881521	-1.69609	-2.91747	-3.74125	-2.67292	-3.3948	-4.34114	-5.23168	16.5505	95.0573	3.87e-21	3.41e-19	2.99972	2.27468	0.886804	1.43797	0.10018	0.103293	0.101026	1.30474	1.51828	0.10017	0.103274	2.65486	0.106495	0.101254
1133	0.00288459	-0.127047	-0.340671	-0.790634	-0.312011	-0.641875	-0.82671	-1.47298	-0.157277	-0.881216	-1.81418	-1.89808	-0.525822	-0.931871	-1.32815	-1.85916	15.1153	11.4838	1.11e-08	1.19e-08	2.93642	2.19066	0.101372	1.17651	0.10018	0.103293	0.101026	1.23745	0.223407	0.10017	0.103274	2.61444	0.106495	0.101254
1134	3.18984	1.90713	1.53067	-5.35898	2.05304	2.48339	2.86955	1.45216	3.34301	3.91853	3.51396	0.89804	5.9133	5.24914	3.56	1.70653	12.3872	41.0831	1.31e-15	3.37e-15	3.06068	2.24987	1.01431	0.100986	0.915911	0.976776	0.101026	1.35799	0.889413	0.10017	2.09466	2.6879	0.106495	3.19576
1135	-0.499459	-0.703337	-0.0202113	0.21218	-0.266796	-0.534167	-0.971346	-1.85476	-0.883178	-1.74648	-2.50925	-2.65708	-2.78653	-3.02903	-2.85595	-3.03383	16.3011	88.5822	4.31e-21	3.54e-19	2.99223	2.25442	0.464911	1.52368	0.152974	0.103293	0.101026	0.936805	1.5735	0.10017	0.103274	2.64525	0.106495	0.101254
1136	-0.402633	-0.411175	0.0586819	-0.077561	-0.533758	-0.565367	-0.562728	-0.952042	-0.738836	-0.782033	-0.760992	-0.95165	-0.621188	-0.0734184	0.0101487	-0.516251	15.946	3.15982	0.00323441	0.0032488	2.86986	2.13112	0.101372	0.100986	0.10018	0.103293	0.101026	0.101889	0.926403	0.10017	0.103274	2.58145	0.106495	0.101254
1137	-0.138192	-0.604952	-0.319948	0.288115	0.115971	-0.325502	-1.29013	-2.13124	-0.246648	-1.75397	-2.99274	-3.69378	-2.62579	-3.67329	-4.33201	-4.64711	15.8247	87.6581	5.98e-21	4.31e-19	2.99857	2.26486	0.101372	1.38638	0.758883	0.103293	0.101026	1.20885	1.59903	0.10017	0.103274	2.65258	0.106495	1.00888
1138	0.0969182	0.350846	0.336145	-0.31512	-0.254565	-0.109315	-0.035474	-0.169986	0.0176486	0.393833	0.508411	0.185296	0.866374	1.36563	1.3901	0.626822	16.45	9.12555	1.61e-07	1.68e-07	2.82065	2.07997	0.101372	0.959002	0.10018	0.103293	0.101026	0.101889	0.100977	0.10017	0.103274	2.58107	0.106495	0.101254
1139	-0.680949	-0.617882	-0.199225	-0.00361643	-0.461081	-0.597296	-0.916704	-2.28462	-0.917233	-1.83764	-3.00964	-4.01727	-2.85002	-3.48884	-4.95485	-6.04	16.4146	82.9499	2.78e-20	1.05e-18	2.98759	2.25401	0.971445	0.856299	0.10018	0.103293	0.421638	1.31819	1.53905	0.10017	0.103274	2.64492	0.106495	0.609686
1140	-0.286149	-0.603166	-0.0597472	0.335346	-0.134609	-0.414382	-0.887866	-1.31043	-0.490207	-1.44382	-2.00901	-1.98293	-2.22058	-2.26435	-1.85625	-1.97588	15.6398	37.2647	1.27e-15	3.27e-15	2.96889	2.20296	0.101372	1.50339	0.10018	0.103293	0.101026	0.706069	1.50061	0.10017	0.103274	2.63185	0.106495	0.927311
1141	-0.615257	-0.618527	-0.349569	0.0202814	-0.461632	-0.620517	-1.1771	-2.32142	-0.880471	-1.80686	-3.28795	-4.19042	-2.93739	-3.69781	-5.24482	-6.082	15.4098	75.0248	1.18e-19	2.71e-18	2.996	2.29453	0.733794	0.100986	0.10018	0.103293	0.101026	1.38186	1.50689	0.370361	0.103274	2.65922	0.106495	0.825355
1142	-0.402147	-0.709485	-0.786381	-0.221861	-0.347181	-0.903039	-1.65263	-2.17668	-0.52803	-2.2119	-3.51128	-4.00102	-2.34691	-3.48103	-5.42547	-5.24903	14.207	45.3218	1.54e-16	5.89e-16	2.99256	2.28293	0.101372	0.813821	0.10018	0.103293	0.853395	1.37324	1.3889	0.10017	0.103274	2.65525	0.106495	0.101254
1143	0.0741705	0.281983	0.375481	-0.0996383	-0.241733	-0.150311	-0.0528899	-0.209344	-0.0360027	0.2295	0.341868	0.0846533	0.609565	1.13844	1.23604	0.541779	16.5086	6.52471	5.91e-06	6.05e-06	2.82934	2.09315	0.101372	1.14245	0.10018	0.103293	0.101026	0.101889	0.100977	0.10017	0.103274	2.57978	0.106495	0.101254
1144	-0.182194	-0.463222	-0.0934599	0.181022	-0.10765	-0.49408	-0.948764	-1.60407	-0.487539	-1.5544	-2.12672	-2.3039	-2.13003	-2.44	-2.10284	-2.73346	16.2273	59.1878	1.62e-18	1.8e-17	2.98144	2.2442	0.101372	1.56214	0.572172	0.103293	0.101026	1.00698	1.42488	0.10017	0.103274	2.64701	0.106495	0.101254
1145	-0.437265	0.332483	0.598567	0.519869	-0.0987833	0.222573	0.336282	-1.12757	-0.70575	-0.871755	-1.79548	-2.96781	-2.48004	-2.9404	-2.8298	-4.42886	12.2934	15.6398	2.51e-10	2.81e-10	3.04324	2.35748	1.37893	1.78586	1.01458	0.162544	0.555245	1.01335	1.50783	0.10017	0.103274	2.69062	0.193515	0.101254
1146	1.23837	3.11009	2.97454	0.426603	0.891664	3.23931	4.88581	6.27757	1.47225	4.53266	5.72873	6.27416	1.73756	3.19708	4.56978	6.12828	12.7027	32.2041	1.77e-14	3.21e-14	3.10384	2.18335	1.5604	0.100986	0.845701	0.103293	0.239015	0.360569	1.35742	0.10017	0.103274	2.57544	0.106495	3.18979
1147	-0.314252	-0.720962	-0.452388	-0.044684	-0.272463	-0.614933	-1.23419	-1.90244	-0.564441	-1.68731	-2.81806	-3.34396	-2.2275	-2.89508	-3.55767	-3.56674	16.1716	63.6008	9.11e-19	1.16e-17	2.97941	2.23407	0.101372	0.100986	0.10018	0.103293	0.101026	1.21036	1.44544	0.10017	0.103274	2.63959	0.106495	0.937766
1148	-0.033668	-0.903826	-0.260105	0.154727	0.166158	-0.78424	-1.50154	-1.88582	-0.252782	-1.77154	-3.28056	-4.03862	-2.47224	-3.74215	-3.42787	-3.79953	12.6698	34.6125	3.6e-15	8.23e-15	2.89874	2.1673	0.101372	1.58157	0.227048	0.103293	0.101026	1.36709	1.53318	0.529522	0.103274	2.57178	0.106495	0.101254
1149	-0.381057	0.0793291	-0.0743749	-0.527124	-0.788289	-0.475283	-0.375595	-1.45982	-0.592136	-1.11558	-2.68815	-3.11931	-0.950356	-1.93862	-3.80527	-4.65444	13.0033	21.6582	2.64e-12	3.3e-12	2.9747	2.23708	1.05492	0.100986	0.10018	0.103293	0.101026	1.35703	0.548236	0.666812	0.103274	2.62659	0.106495	0.101254
1150	0.0409528	0.124621	-0.390367	-1.12332	-0.233103	-0.345895	-0.88553	-1.71475	-0.0763885	-1.10409	-2.25418	-2.6085	-0.614425	-1.54749	-3.13436	-3.66846	12.8929	20.9725	3.64e-12	4.48e-12	2.98182	2.25107	0.349325	0.863029	0.694488	0.103293	0.101026	1.26525	0.100977	0.518543	0.103274	2.6315	0.586365	0.101254
1151	3.9461	2.10721	1.03911	-2.18786	2.26451	2.43043	3.16216	2.48946	4.17826	4.20443	3.76145	1.70258	6.41993	5.89439	4.25319	2.40954	12.8904	42.0885	4.34e-16	1.31e-15	3.03144	2.18885	0.101372	0.821785	0.936447	0.103293	0.788512	1.33769	0.100977	0.10017	1.9155	2.65125	0.106495	3.11476
1152	1.05667	1.8708	1.65823	-0.612866	0.128958	1.8839	3.04269	3.57304	0.606376	2.85912	3.59143	3.3472	0.855366	1.60567	2.16831	2.55346	12.992	20.9673	5.72e-12	6.91e-12	3.05597	2.21227	1.3047	1.63675	0.777902	0.103293	0.101026	0.846571	0.100977	0.10017	0.103274	2.60939	0.106495	2.7633
1153	-0.24059	-0.771172	-0.435519	0.19837	0.0737888	-0.482228	-1.45908	-2.2269	-0.377398	-1.96547	-3.26712	-3.88872	-2.61595	-3.93264	-4.50846	-5.52505	14.9927	74.9708	7.05e-20	2.06e-18	2.98519	2.2577	0.101372	1.37514	0.10018	0.141632	0.101026	1.36214	1.60911	0.10017	0.103274	2.64643	0.106495	1.00905
1154	-0.482076	-0.0200934	0.443914	0.493002	-0.0950734	0.016068	-0.222	-1.74023	-0.744996	-1.17194	-2.16122	-3.03514	-2.77808	-3.32141	-3.93255	-4.85817	13.3746	34.2115	5.25e-15	1.11e-14	3.00848	2.27529	1.21651	1.54268	0.767188	0.103293	0.244233	0.441376	1.63609	0.10017	0.520074	2.65774	0.106495	1.0777
1155	-0.261265	-0.164247	0.167829	0.0039747	0.0107074	0.0787955	-0.285304	-1.62358	-0.0936918	-0.764747	-2.25497	-3.18097	-1.47432	-2.68264	-3.48829	-4.93799	13.0005	22.2991	2.54e-12	3.18e-12	2.99558	2.25531	1.12827	0.100986	0.940029	0.457552	0.101026	1.43975	1.40802	0.10017	0.103274	2.63856	0.106495	1.19092
1156	0.172351	0.312698	0.130145	-0.409953	-0.163127	-0.245293	-0.268714	-0.541644	0.0923942	0.0398821	-0.137638	-0.436012	0.486769	0.724959	0.661326	-0.0162767	16.5354	4.87034	9.83e-05	9.99e-05	2.86055	2.11841	0.101372	1.23301	0.10018	0.103293	0.101026	0.19309	0.100977	0.10017	0.103274	2.59667	0.106495	0.248539
1157	-0.215955	-0.685378	-0.387872	0.182243	0.0606449	-0.474482	-1.51178	-2.2627	-0.379857	-2.04848	-3.31025	-3.83696	-2.63797	-4.12266	-4.77428	-5.70312	16.0489	104.402	5.48e-22	9.63e-20	2.99714	2.28377	0.101372	1.44846	0.515923	0.103293	0.101026	1.33004	1.59179	0.10017	0.103274	2.65125	0.106495	0.559612
1158	0.218033	0.311585	0.00636201	-0.44822	-0.155324	-0.200584	-0.337918	-0.487584	0.11917	0.325931	0.111076	-0.172974	0.880955	1.22222	0.947572	0.353038	15.7	6.84354	3.62e-06	3.72e-06	2.82647	2.07585	0.101372	0.100986	0.10018	0.103293	0.101026	0.101889	0.100977	0.10017	0.103274	2.58116	0.106495	0.754665
1159	-0.371829	-0.78378	-0.421746	-0.101438	-0.269034	-0.795269	-1.32472	-2.12078	-0.632716	-1.90206	-2.9696	-3.36548	-2.36229	-2.89869	-3.74383	-3.96411	15.8872	88.0984	4.68e-21	3.74e-19	2.97304	2.22244	0.101372	0.100986	0.212948	0.103293	0.101026	1.24238	1.43641	0.23422	0.103274	2.62655	0.106495	0.101254
1160	-0.260579	0.335367	0.221043	-0.315145	-0.236739	-0.240814	0.0233852	-1.38004	-0.287799	-0.620999	-2.08391	-2.52988	-0.984641	-1.76729	-2.53552	-3.76999	14.2015	29.5349	3.33e-14	5.61e-14	2.99767	2.27726	1.03781	1.58577	0.10018	0.293039	0.101026	1.21072	0.784988	0.10017	0.103274	2.63326	0.106495	0.631812
1161	-0.349326	-0.713775	-0.387801	-0.20026	-0.349564	-0.773721	-1.23764	-1.90983	-0.659275	-1.78513	-2.6135	-2.76138	-1.95484	-2.34811	-2.85716	-3.16078	16.5066	67.381	2.43e-19	4.39e-18	2.96905	2.2209	0.101372	0.436975	0.10018	0.103293	0.101026	1.2318	1.33136	0.10017	0.103274	2.63366	0.106495	0.101254
1162	3.24952	2.03554	0.730116	-3.25307	1.85651	2.53543	2.76707	2.71067	3.42539	3.90949	3.4552	1.93526	5.51222	5.31083	3.554	1.5672	13.3478	34.6843	6.39e-15	1.33e-14	3.04881	2.20854	0.101372	1.66502	0.10018	0.103293	0.334927	1.2152	0.100977	0.10017	1.8304	2.66762	0.146496	3.0523
1163	-0.697016	-0.633971	-0.392942	-0.0147616	-0.393363	-0.337807	-1.02525	-2.23145	-0.842022	-1.64112	-3.08903	-4.41908	-3.32992	-3.71346	-5.13746	-7.09011	15.0681	74.8183	1.23e-19	2.79e-18	2.99201	2.26951	0.949642	0.100986	0.10018	0.103293	0.101026	1.33481	1.63071	0.10017	0.411806	2.65331	0.482976	0.978325
1164	-0.0357454	-0.497628	-0.558675	-0.081135	0.136138	-0.281429	-1.37381	-2.21773	-0.0354999	-1.69048	-2.99098	-3.82958	-2.14713	-3.39537	-5.05962	-5.55351	14.7073	62.4381	1.29e-18	1.48e-17	2.99387	2.27826	0.101372	0.896506	0.685141	0.326513	0.101026	1.361	1.4935	0.10017	0.103274	2.64382	0.106495	1.13612
1165	-0.628689	-0.157728	-0.258158	0.110052	0.106228	-0.113469	-0.545785	-1.78033	-0.619141	-1.26913	-2.8477	-3.77879	-2.47579	-3.48377	-4.44828	-6.49063	14.0341	33.2516	1.14e-14	2.18e-14	3.01331	2.31565	0.979628	1.73642	0.10018	0.0969104	0.359144	1.28452	1.54457	0.10017	0.103274	2.6761	0.887589	0.78334
1166	1.7823	2.34033	1.50428	-2.37318	0.687083	2.39759	3.36244	3.37127	2.25977	4.06609	4.2899	3.17073	3.68057	4.41605	4.28042	2.70259	14.2499	36.7496	2.87e-15	6.78e-15	3.09618	2.28545	1.53328	1.76769	0.10018	0.103293	0.13855	1.42452	1.25836	0.10017	1.61132	2.68497	0.106495	3.20379
1167	0.195311	0.215266	-0.355892	-0.887453	-0.181153	-0.203748	-0.537826	-1.3164	0.167055	-0.606805	-1.7754	-2.36661	-0.217983	-1.44042	-2.71156	-3.6875	13.4101	13.4489	1.65e-09	1.8e-09	2.98029	2.23726	0.439325	0.100986	0.767698	0.103293	0.101026	1.25631	0.130567	0.10017	0.217391	2.63464	0.293082	1.04941
1168	0.161889	-0.599955	-0.13747	-0.0291815	0.2251	-0.609093	-1.07643	-1.57277	0.162061	-1.47125	-2.51636	-2.84157	-1.42204	-2.34609	-2.65144	-2.56285	13.4183	24.6027	4.16e-13	5.88e-13	2.93082	2.09925	0.101372	1.457	0.10018	0.103293	0.101026	1.33173	1.25252	0.669718	0.103274	2.58659	0.106495	0.101254
1169	-0.0816986	-0.0585778	-0.0126179	-0.405915	-0.36535	-0.380708	-0.361458	-1.52737	-0.372379	-1.10543	-2.47249	-3.01072	-1.02271	-1.88722	-3.27277	-3.83329	14.158	24.5055	7.22e-13	9.71e-13	2.95809	2.18304	0.988803	0.100986	0.10018	0.103293	0.101026	1.32986	0.843887	0.10017	0.245413	2.60002	0.106495	0.74588
1170	1.51014	2.54814	1.89133	-1.57797	0.441097	2.47037	3.8938	4.35761	1.73353	4.46432	4.90361	3.85732	3.41058	4.68024	4.47431	3.15102	14.9393	50.0324	3.81e-17	1.99e-16	3.0936	2.27094	1.67753	1.43155	0.10018	0.103293	0.101026	1.34809	1.23568	0.10017	1.33817	2.66768	0.106495	3.2176
1171	-0.465912	-0.805337	-0.535639	-0.199301	-0.449755	-0.866893	-1.43488	-2.10412	-0.81254	-1.98734	-2.86299	-3.08616	-2.30028	-2.89696	-3.229	-3.32455	15.8137	62.148	7.92e-19	1.02e-17	2.96823	2.24578	0.101372	0.100986	0.10018	0.103293	0.101026	1.18344	1.38297	0.10017	0.192806	2.63269	0.106495	0.101254
1172	0.236496	0.628268	0.54926	-0.0460359	0.00102922	0.0625776	0.238379	0.180005	0.267807	0.72751	0.858581	0.483276	1.04572	1.59606	1.73368	0.95502	15.1752	8.25725	4.89e-07	5.06e-07	2.82211	2.08206	0.101372	1.5463	0.10018	0.103293	0.101026	0.101889	0.100977	0.10017	0.103274	2.58231	0.106495	0.101254
1173	0.272663	-0.291829	-0.476595	0.184981	0.442952	0.310362	-0.969267	-1.85516	0.508844	-0.844047	-2.59599	-3.59336	-1.55466	-2.77297	-4.34828	-4.08572	13.6031	33.7364	9.36e-15	1.86e-14	2.99993	2.246	0.101372	1.17257	0.880367	0.103293	0.101026	1.27418	1.68474	0.10017	0.73335	2.64495	0.106495	1.37182
1174	-0.364224	-0.204596	0.0565684	0.23869	-0.0426427	-0.208412	-0.617266	-2.08954	-0.507346	-1.37462	-2.6182	-3.65789	-2.4051	-3.28866	-4.41781	-5.82036	16.1099	76.4594	8.98e-20	2.38e-18	3.00833	2.29761	0.975051	1.62281	0.745765	0.103293	0.101026	1.29094	1.50714	0.10017	0.103274	2.65947	0.106495	0.724571
1175	-0.478573	-0.786907	-0.492873	0.0377652	-0.248692	-0.675001	-1.46366	-2.20957	-0.691833	-2.12967	-3.27216	-3.77463	-2.7808	-4.1762	-4.93672	-5.44637	15.8914	96.0214	1.42e-21	1.8e-19	3.00256	2.28119	0.101372	1.4582	0.10018	0.103293	0.101026	1.37631	1.56106	0.10017	0.103274	2.66387	0.106495	0.101254
1176	-0.848384	-0.70101	-0.0734908	0.0541176	-0.485171	-0.557034	-0.842326	-2.37143	-1.1306	-1.86699	-3.07264	-4.19602	-3.4167	-3.66685	-5.0461	-6.56276	16.35	74.6655	1.26e-19	2.85e-18	3.00479	2.27224	1.03251	0.620327	0.10018	0.103293	0.101026	1.29532	1.6215	0.10017	0.103274	2.65848	0.106495	0.307632
1177	-0.494488	-1.0759	-0.35654	0.0178604	-0.374129	-0.846416	-1.29854	-1.92072	-0.828129	-2.06419	-2.69272	-2.78417	-2.93368	-2.98717	-2.98156	-2.7962	15.7462	54.4653	5.42e-18	4.39e-17	2.96132	2.1891	0.101372	0.100986	0.10018	0.103293	0.101026	1.10185	1.56751	0.10017	0.103274	2.62192	0.106495	0.101254
1178	-0.622906	-0.741208	0.112323	0.196056	-0.486378	-0.643009	-0.657024	-1.33608	-1.07011	-1.59865	-1.81897	-1.72836	-2.45868	-2.07847	-1.56878	-1.64679	16.0257	21.7377	3.55e-12	4.39e-12	2.95549	2.19314	0.278804	1.10117	0.10018	0.103293	0.101026	0.401049	1.47628	0.10017	0.103274	2.61961	0.106495	0.101254
1179	-0.51802	-0.272103	0.0704286	0.116517	-0.21683	-0.301359	-0.515818	-2.00239	-0.816578	-1.37978	-2.56924	-3.47722	-2.33771	-2.94809	-3.89234	-4.77631	16.098	60.1979	2.76e-18	2.68e-17	2.99799	2.26421	1.02503	1.53393	0.10018	0.103293	0.108257	1.16801	1.47043	0.10017	0.103274	2.64229	0.106495	0.894301
1180	-0.785422	-0.33204	0.115764	-0.180689	-0.780541	-0.543348	-0.39507	-1.88418	-1.17934	-1.46654	-2.6488	-3.92149	-2.29385	-2.74899	-4.31507	-5.28074	15.0327	40.3434	7.84e-16	2.13e-15	2.99337	2.26855	1.21629	0.100986	0.10018	0.103293	0.101026	1.33497	1.31726	0.10017	0.103274	2.64243	0.106495	0.101254
1181	0.298142	0.276064	-0.253906	-0.621848	0.0489665	-0.310797	-0.578911	-0.973192	0.299705	-0.36486	-1.15201	-1.55993	0.0773972	-0.450747	-0.767737	-1.32253	14.7962	7.94021	7.5e-07	7.72e-07	2.93439	2.19193	0.101372	1.52938	0.10018	0.103293	0.101026	1.13214	0.100977	0.10017	0.103274	2.60964	0.106495	1.02924
1183	0.786327	2.51128	0.57928	-1.79206	0.145173	2.47455	3.08829	4.05254	1.07945	3.76303	3.47987	4.01739	0.804328	1.72712	2.03783	3.34708	14.6153	31.2475	2.68e-14	4.62e-14	3.08591	2.23697	0.784534	1.52292	0.10018	0.103293	0.101026	1.23413	1.4449	0.10017	0.103274	2.61933	0.106495	3.1647
1184	2.53852	2.85103	1.62528	-3.70812	1.42041	2.74931	3.05626	3.93031	2.79789	4.21351	4.15257	4.37413	4.60887	4.7054	4.55853	4.34947	13.1827	21.1963	4.95e-12	6.05e-12	3.09726	2.22914	0.101372	2.00727	0.496087	0.103293	0.101026	1.36832	0.642658	0.10017	1.3681	2.6613	0.106495	3.16234
1185	2.38905	2.98215	1.4885	-3.16876	1.4818	2.78076	3.35439	3.58187	3.01152	4.74891	4.29435	2.98594	5.47486	5.53563	4.57546	2.68908	13.642	35.7705	4.17e-15	9.25e-15	3.07206	2.26836	1.0853	1.41296	0.607014	0.708529	0.719081	1.49308	0.459425	0.10017	1.62997	2.67369	0.106495	3.19605
1186	-0.043673	0.190429	0.318613	-0.301989	-0.422111	-0.295585	-0.0152221	-0.450163	-0.293161	0.137914	0.174906	-0.181315	0.527992	1.08697	0.981799	0.177922	15.6292	4.74694	0.000123729	0.000125719	2.8396	2.09089	0.101372	0.100986	0.10018	0.103293	0.101026	0.101889	0.100977	0.10017	0.103274	2.58215	0.106495	0.101254
1187	-0.0883136	-0.328549	-0.479066	-0.0624023	0.196506	-0.218756	-1.34379	-2.24005	0.0397791	-1.50715	-2.98921	-3.98608	-2.12974	-3.37528	-4.99287	-5.77149	15.0953	65.5676	8.15e-19	1.04e-17	2.99431	2.27624	0.114577	1.05292	0.934651	0.103293	0.101026	1.4061	1.48456	0.10017	0.402158	2.64743	0.106495	1.10319
1188	-0.586137	-0.0336953	0.278004	-0.0758227	-0.547668	-0.305357	0.0307712	-1.27811	-0.729938	-0.95889	-2.04601	-3.2161	-1.62912	-2.44383	-3.58233	-4.94024	14.3129	25.0044	5.51e-13	7.55e-13	3.00129	2.25978	1.34284	0.100986	0.487926	0.103293	0.101026	1.41869	1.18523	0.10017	0.103274	2.6507	0.106495	0.841034
1189	0.0267972	-0.357874	-0.162822	0.200625	0.14408	-0.293705	-1.01847	-1.81057	-0.197927	-1.42557	-2.5771	-3.02258	-2.15655	-3.05781	-2.93537	-3.82714	15.5791	85.6981	7.03e-21	4.93e-19	2.98548	2.2439	0.101372	1.20609	0.854778	0.103293	0.101026	0.987399	1.45196	0.320884	0.103274	2.63847	0.106495	0.88173
1191	-0.664933	-0.437719	0.402426	0.159895	-0.273541	-0.311128	-0.341762	-2.1321	-0.80004	-1.55987	-2.55103	-4.03938	-2.72411	-3.24873	-4.43287	-5.43931	14.7825	58.449	4.2e-18	3.64e-17	2.9874	2.24559	1.23712	0.100986	0.846488	0.103293	0.101026	1.2718	1.55864	0.10017	0.103274	2.63723	0.106495	0.101254
1192	-0.766693	-0.511791	0.336869	0.0979476	-0.501234	-0.457335	-0.472493	-2.12854	-1.15799	-1.71519	-2.6355	-3.74025	-3.09631	-3.47469	-4.48775	-5.65502	15.0505	73.3313	8.8e-20	2.38e-18	2.99416	2.27222	1.19793	0.171397	0.756523	0.103293	0.101026	0.970553	1.57102	0.10017	0.103274	2.6422	0.106495	0.101254
1193	-0.384651	-0.757864	-0.333596	0.170756	-0.152622	-0.57796	-1.30785	-2.02096	-0.622829	-1.98956	-2.91668	-3.15033	-2.74059	-3.48763	-3.67123	-3.82511	16.5316	138.479	5.57e-24	5.78e-21	2.99413	2.25495	0.101372	1.50142	0.10018	0.103293	0.101026	1.14316	1.57069	0.10017	0.103274	2.64631	0.106495	0.35266
1194	-0.0526266	-0.24065	0.271637	0.275052	-0.153166	-0.311119	-0.415012	-0.715554	-0.299808	-0.738262	-0.599957	-0.862421	-1.01508	-0.437254	0.0414763	-0.766432	15.68	4.33178	0.000274943	0.000278831	2.91106	2.15512	0.101372	1.30719	0.631075	0.103293	0.101026	0.101889	1.13771	0.10017	0.103274	2.61314	0.106495	0.101254
1195	0.000776809	0.296403	0.295076	-0.445703	-0.335406	-0.280509	-0.0549702	-0.41344	-0.161523	0.313203	0.309227	0.0163628	0.81285	1.3273	1.19889	0.522145	15.518	7.14512	2.31e-06	2.38e-06	2.81431	2.05788	0.101372	0.100986	0.10018	0.103293	0.101026	0.101889	0.100977	0.10017	0.103274	2.56007	0.106495	0.101254
1197	1.87033	3.56664	2.90467	0.525248	1.64203	3.60267	4.61473	6.22507	1.44498	4.93524	6.03403	6.94203	1.59338	2.43328	4.78676	6.40588	13.5516	42.068	4.37e-16	1.32e-15	3.14722	2.24669	1.49854	2.01106	1.08575	0.103293	0.101026	1.3627	1.579	0.64352	0.103274	2.60212	0.106495	3.30995
1198	-0.658187	-0.336242	-0.072085	0.0194115	-0.238562	-0.223852	-0.792072	-2.30844	-0.736457	-1.66712	-2.72986	-3.6823	-2.35015	-3.20062	-4.38101	-8.1723	13.0062	34.3764	4.44e-15	9.56e-15	3.00436	2.29348	1.12298	0.100986	1.02104	0.103293	0.888758	1.40078	1.46152	0.10017	0.103274	2.66066	0.106495	0.101254
1199	-0.0776643	-0.0205461	-0.423219	-1.0332	-0.41545	-0.730199	-0.895015	-1.54365	-0.27826	-0.732394	-1.08967	-1.60055	-0.222876	-0.417616	-0.674172	-1.9614	14.5265	6.75378	4.15e-06	4.25e-06	2.92928	2.22436	0.101372	0.100986	0.5876	0.103293	0.101026	0.942023	0.100977	0.10017	0.103274	2.62713	0.106495	0.211319
1200	-0.421807	-0.686355	-0.130483	0.0743506	-0.321495	-0.62995	-1.01141	-1.72278	-0.743755	-1.6395	-2.26997	-2.39621	-2.26429	-2.37232	-2.27927	-2.51018	17.0684	79.8637	1.99e-20	8.26e-19	2.96458	2.21511	0.101372	1.17975	0.10018	0.103293	0.101026	1.03967	1.43307	0.10017	0.103274	2.62805	0.106495	0.101254
1201	-0.699939	0.241611	0.270912	-0.569343	-0.915348	-0.369957	0.216965	-1.03232	-0.823711	-0.672291	-1.59919	-2.62357	-1.00205	-1.64553	-2.81669	-3.9514	13.3851	21.7594	2.21e-12	2.79e-12	2.99615	2.26976	1.36227	1.21131	0.10018	0.103293	0.101026	1.27364	0.355176	0.10017	0.103274	2.64601	0.106495	0.101254
1202	-0.0516491	-0.633544	-0.357665	0.244696	0.222464	-0.39359	-1.49439	-2.21	-0.214662	-1.92146	-2.99808	-3.38957	-2.82411	-4.18935	-4.28277	-5.09673	14.4757	80.3657	1.82e-20	7.75e-19	3.00337	2.27295	0.101372	1.70569	1.03254	0.103293	0.101026	1.23018	1.6276	0.10017	0.103274	2.65826	0.106495	0.101254
1203	-0.352539	0.334133	0.342209	-0.199356	-0.324152	-0.109985	0.334857	-0.948613	-0.45576	-0.381017	-1.40807	-2.28718	-0.955178	-1.65655	-2.35303	-2.85048	14.6411	27.881	7.43e-14	1.17e-13	2.9872	2.23606	1.19775	1.55523	0.10018	0.103293	0.101026	1.1509	0.844216	0.10017	0.103274	2.63378	0.106495	0.980082
1204	-0.15217	-0.467977	-0.52834	0.0673692	-0.00188468	-0.380407	-1.16173	-1.91254	-0.251135	-1.49035	-2.96681	-3.67557	-2.11303	-3.27036	-4.19637	-4.71156	15.6691	58.7185	3.93e-18	3.5e-17	2.99197	2.26191	0.101372	1.22218	0.10018	0.103293	0.101026	1.33574	1.4794	0.10017	0.103274	2.64223	0.106495	1.1514
1206	-0.0974926	0.494193	-0.0449987	-0.674857	-0.119532	-0.314815	-0.0774134	-1.10205	0.057117	-0.300638	-1.46053	-1.63252	-0.169564	-1.32809	-1.89585	-2.50047	12.7766	10.6423	2.1e-08	2.23e-08	2.98692	2.25607	0.823308	1.77115	0.10018	0.103293	0.101026	1.00873	0.100977	0.361189	0.166993	2.6477	0.143519	0.637858
1207	-0.481698	-0.873701	-0.339888	0.0754726	-0.289518	-0.698934	-1.38127	-1.96166	-0.780285	-2.02971	-2.87472	-2.97706	-2.79822	-3.36113	-3.35418	-3.49737	16.7148	126.62	2.12e-23	1.23e-20	2.9858	2.24831	0.101372	1.30665	0.10018	0.103293	0.101026	1.16371	1.54811	0.10017	0.103274	2.64541	0.106495	0.101254
1209	2.71789	2.45615	1.78743	-2.16323	1.65193	2.72672	3.68292	3.62719	2.86485	4.61562	4.61519	3.30947	5.19829	5.65567	4.38981	2.82808	14.6728	44.8648	1.77e-16	6.62e-16	3.0512	2.2123	1.33266	0.928939	0.71195	0.103293	0.101026	1.22935	0.323545	0.10017	1.73933	2.64944	0.106495	3.13805
1210	-0.569684	-0.28444	0.127255	0.232756	-0.0952777	-0.144549	-0.575526	-2.06057	-0.669062	-1.31102	-2.49302	-3.86818	-2.8517	-3.59756	-4.86304	-5.86827	15.6828	52.4856	1.94e-17	1.2e-16	3.00738	2.294	1.1385	1.24353	0.804541	0.103293	0.101026	1.27418	1.62438	0.10017	0.103274	2.65851	0.106495	1.03391
1211	1.9969	1.9615	0.542165	-2.0285	0.75609	2.17688	2.69932	1.95632	2.14305	3.66989	3.29468	1.84338	3.57432	3.97941	3.7343	1.93132	12.5596	21.3971	4.38e-12	5.36e-12	3.03841	2.21511	1.47786	1.4771	0.10018	0.103293	0.101026	1.23715	1.44335	0.852822	1.79437	2.62795	0.106495	3.12656
1212	-0.0781258	0.037092	0.267118	0.0774816	-0.269324	-0.240949	-0.313184	-0.413234	-0.239362	-0.165746	-0.118567	-0.27097	0.0123068	0.526686	0.705963	0.126406	16.2346	3.04771	0.00416409	0.00417647	2.85251	2.13129	0.101372	1.28555	0.10018	0.103293	0.101026	0.101889	0.441814	0.10017	0.103274	2.59111	0.106495	0.101254
1213	0.19789	0.55486	0.490469	-0.143897	-0.0802163	-0.00400046	0.140181	0.0188658	0.175296	0.536479	0.635712	0.384315	0.93506	1.44954	1.56222	0.847759	16.0464	8.3348	4.41e-07	4.57e-07	2.82215	2.08255	0.101372	1.31955	0.10018	0.103293	0.101026	0.101889	0.100977	0.10017	0.103274	2.57654	0.106495	0.101254
1214	3.38635	2.76798	1.5121	-2.7605	2.33067	2.99141	3.16145	2.85689	3.92972	4.65076	3.6669	2.20442	6.13509	5.50894	3.94256	2.24291	13.3007	41.7577	4.84e-16	1.42e-15	3.04925	2.23008	0.352655	0.891032	0.10018	0.979364	0.161223	1.44354	1.34146	0.10017	1.91635	2.66746	0.106495	3.17767
1215	2.26025	2.54804	2.08705	-1.5293	1.1128	2.69846	3.8379	3.8855	2.51751	4.49778	4.75085	3.67884	4.07577	4.78689	4.92122	3.6663	14.5924	35.6975	4.29e-15	9.36e-15	3.09475	2.24264	1.66022	1.35153	0.677445	0.103293	0.101026	1.37554	1.43084	0.10017	1.72125	2.66975	0.106495	3.24012
1216	0.00737355	2.33566	0.504375	-4.01904	-0.312268	2.11029	3.12707	4.64495	0.9148	4.18603	3.63633	5.06793	1.61312	2.5439	3.07534	4.68048	13.0659	33.4289	1.06e-14	2.06e-14	3.1049	2.19726	0.764182	0.439148	0.10018	0.378206	0.101026	0.81724	1.50832	0.10017	0.278832	2.55325	0.106495	3.2625
1217	0.454272	2.44995	2.89459	-5.04456	-0.958745	2.54932	4.66554	6.01386	0.568909	4.73812	6.19991	5.25507	1.87583	4.43601	4.48395	4.06303	12.805	47.0194	2.44e-16	8.32e-16	3.10621	2.24226	1.72277	1.14735	0.10018	0.898845	0.101026	1.33808	0.547557	0.10017	0.605894	2.65205	0.106495	3.25246
1219	0.0803511	0.215071	0.277764	-0.430551	-0.287529	-0.285171	-0.177991	-0.279148	-0.0427786	0.355092	0.462616	0.115016	0.862243	1.413	1.35706	0.628405	16.028	8.9932	1.89e-07	1.98e-07	2.80747	2.05403	0.101372	0.151866	0.10018	0.103293	0.101026	0.101889	0.100977	0.10017	0.103274	2.56605	0.106495	0.101254
1220	2.29277	2.38883	1.882	-1.08359	0.947455	2.52838	4.08117	4.31454	1.71088	4.63176	5.12612	3.84265	4.31968	5.58169	4.56153	2.90911	13.6802	28.3263	1.02e-13	1.57e-13	3.0743	2.22361	1.56193	1.21022	0.10018	0.103293	0.101026	0.847145	0.479828	0.10017	1.59031	2.663	0.106495	3.13659
1222	2.29404	2.45504	2.30714	-2.87615	1.59017	2.91424	3.70267	3.85161	2.57047	4.44905	5.08988	4.33795	3.98537	4.6982	5.8366	4.63302	12.6769	27.3916	1.61e-13	2.4e-13	3.12725	2.26478	1.71152	1.9479	1.05022	0.103293	0.217715	1.44761	1.58355	0.10017	1.84548	2.6793	0.533751	3.31543
1223	2.05334	2.57113	2.10196	-0.872972	1.15774	2.53646	4.1376	3.31176	2.24867	4.29811	4.7616	2.70931	4.76398	5.45064	4.96606	2.53947	12.9389	37.663	1.39e-15	3.53e-15	3.05912	2.20686	1.68071	0.100986	0.10018	0.942768	0.575955	1.3116	1.23295	0.10017	1.77744	2.65559	0.106495	3.18048
1224	3.00949	3.28693	2.46766	-4.08972	1.93978	3.44173	4.09452	4.14733	3.3602	4.78414	5.48949	5.63678	5.43358	5.74618	7.0403	6.36165	12.5698	45.5658	1.99e-16	7.15e-16	3.13907	2.22635	1.40177	2.27452	0.586168	0.793441	0.101026	1.42573	1.43832	0.10017	1.72838	2.60618	0.106495	3.31174
1225	0.376099	2.72092	2.23975	0.0171652	-0.249253	2.57519	4.29042	5.59442	0.497969	4.10794	5.44571	5.65342	1.01518	2.26465	4.06875	4.89724	14.8457	48.2488	6.36e-17	2.96e-16	3.12825	2.25871	1.7003	1.62758	0.797857	0.103293	0.101026	1.27127	1.51522	0.10017	0.103274	2.62765	0.106495	3.26867
1227	-0.77913	0.447492	0.765224	0.520817	-0.213472	0.298718	0.670559	-0.605659	-0.669787	-0.761605	-0.704276	-1.35132	-1.98328	-2.30392	-2.20168	-3.21598	12.2281	10.0928	5.08e-08	5.38e-08	3.03831	2.27815	1.52197	1.89318	0.747218	0.103293	0.754187	1.01885	1.59418	0.10017	0.103274	2.67944	0.106495	1.20466
1229	2.97976	2.38406	1.76989	-1.51361	1.93239	2.89711	3.83625	3.6652	3.09435	4.61242	4.70705	2.74584	5.15417	5.69362	4.3685	2.22397	14.1996	42.2975	4.05e-16	1.24e-15	3.05733	2.21489	1.41865	0.554614	0.483936	0.103293	0.286032	1.37056	0.100977	0.10017	1.73769	2.67588	0.106495	3.09643
1230	1.84998	3.59431	2.43658	0.765846	1.74273	3.53712	4.92881	6.07099	2.45522	4.93316	6.29024	6.94438	2.4599	3.42368	5.88322	6.83229	12.691	34.705	6.33e-15	1.33e-14	3.11661	2.12176	1.47555	1.57699	1.04778	0.580065	0.479171	1.40593	1.49784	0.10017	0.103274	2.51319	0.106495	3.31177
1234	0.0903491	0.203389	0.229403	-0.425781	-0.284558	-0.281269	-0.22995	-0.35193	-0.00800461	0.327802	0.334642	0.0395472	0.809006	1.30523	1.22026	0.56369	16.1175	8.24213	4.99e-07	5.16e-07	2.81546	2.06847	0.101372	0.14088	0.10018	0.103293	0.101026	0.101889	0.100977	0.10017	0.103274	2.57252	0.106495	0.101254
1236	3.60562	2.78674	1.66077	-2.56873	2.35194	3.14655	3.54965	3.13148	3.94568	4.6497	4.31024	2.71368	6.3632	6.25179	4.71053	2.62108	14.0062	44.3101	2.11e-16	7.49e-16	3.03139	2.17617	0.631245	1.46578	0.10018	0.287429	0.567188	1.30584	0.399023	0.10017	1.77454	2.62311	0.106495	3.07584
1237	1.73946	2.69114	1.56528	-1.07275	0.542384	2.58198	3.29081	3.6994	2.1407	4.21156	4.10542	3.34454	3.9278	4.36011	4.96782	3.59576	12.8291	24.9917	5.55e-13	7.59e-13	3.10036	2.25077	1.52096	1.29366	0.10018	0.103293	1.00552	1.4284	1.54863	0.10017	1.48134	2.66112	0.106495	3.25914
1238	1.88234	2.0919	2.146	-2.44018	1.10924	2.30258	3.7356	3.13362	2.07829	4.1234	4.75236	2.59505	4.4698	5.34901	5.75416	3.57467	13.7813	46.9652	9.31e-17	3.91e-16	3.09133	2.21141	1.70116	1.39969	0.408613	0.128051	1.04358	1.32209	1.2963	0.376182	1.84221	2.66816	0.106495	3.25636
1239	-0.470787	-0.830614	-0.710345	-0.122416	-0.324578	-0.920068	-1.64591	-2.37706	-0.643994	-2.2743	-3.55998	-4.10041	-2.62415	-3.67303	-5.5523	-5.68777	14.8177	69.2314	2.41e-19	4.39e-18	2.99132	2.27745	0.101372	0.449851	0.10018	0.103293	0.806512	1.32669	1.47785	0.221473	0.103274	2.65144	0.106495	0.101254
1240	-0.126314	-0.307295	0.16884	0.409211	-0.0662694	-0.344898	-0.540444	-0.690275	-0.332619	-0.754815	-0.864196	-0.813434	-0.917474	-0.613541	-0.266118	-0.57011	15.1268	4.89778	9.34e-05	9.5e-05	2.908	2.15022	0.101372	1.62098	0.10018	0.103293	0.101026	0.101889	1.2214	0.10017	0.103274	2.60934	0.106495	0.820349
1244	2.63339	2.29662	1.41911	-2.56958	1.67769	2.65041	3.43978	2.70743	3.04277	4.24518	4.16377	2.02112	4.93095	5.15686	4.50111	2.07429	14.8761	49.051	5.04e-17	2.45e-16	3.07396	2.23357	1.34771	1.60636	0.10018	0.103293	0.344765	1.39847	0.99449	0.164506	1.89669	2.68886	0.106495	3.17088
1246	-0.691408	-0.431211	-0.0763458	0.11542	-0.405686	-0.483207	-0.726307	-2.16532	-0.900968	-1.60332	-2.85464	-3.89542	-2.69908	-3.32989	-4.6553	-6.12268	16.1918	60.7755	2.41e-18	2.4e-17	3.00776	2.28833	1.02703	1.22151	0.10018	0.103293	0.405579	1.32548	1.50208	0.10017	0.103274	2.66882	0.106495	0.643843
1247	2.65195	2.3254	1.42442	-1.85234	1.581	2.62925	3.40521	2.54114	2.8698	4.18228	3.95321	2.2142	4.60818	4.78674	4.36279	2.6849	14.5902	45.3441	1.53e-16	5.86e-16	3.07441	2.24616	1.38165	1.48926	0.571575	0.103293	0.101026	1.21327	1.27434	0.20935	1.92071	2.67468	0.106495	3.18942
1248	-0.423273	2.39246	2.44638	0.423002	0.159176	2.36192	4.27107	5.40498	0.24612	3.84633	5.19541	5.23208	0.523073	2.20104	3.1549	4.15505	12.8248	32.7362	1.42e-14	2.64e-14	3.11168	2.23345	1.63407	1.68634	0.10018	0.402778	0.101026	0.401399	1.45003	0.10017	0.103274	2.62409	0.106495	3.12974
1249	1.05333	2.52133	3.82304	-0.943454	0.259179	2.922	5.38307	7.03062	0.911688	4.92085	7.65656	8.26291	0.911688	4.26881	6.75647	7.9526	13.6519	84.4985	2.13e-20	8.54e-19	3.14693	2.15634	1.62077	2.10498	0.10018	0.103293	0.101026	0.872412	0.900405	0.10017	0.103274	2.49925	0.106495	3.24911
1250	-0.327081	-0.425269	0.386893	0.188959	-0.436004	-0.417789	-0.2791	-0.812087	-0.719704	-1.08883	-0.968997	-0.984606	-1.48899	-0.977624	-0.442378	-0.628846	15.5955	7.78038	9.34e-07	9.62e-07	2.91764	2.11406	0.355032	0.962837	0.10018	0.103293	0.101026	0.101889	1.23823	0.10017	0.103274	2.59101	0.106495	0.101254
1251	2.6598	2.51343	2.15885	-1.80195	1.80867	2.85486	3.84735	2.47307	3.10873	4.32197	4.44972	1.48638	4.83089	5.18417	5.33004	2.69399	13.3731	38.2941	1.62e-15	4.04e-15	3.0911	2.2477	1.56171	1.5537	0.10018	0.103293	0.983919	1.43217	1.41916	0.3515	1.97936	2.70881	0.106495	3.22759
1252	1.81996	2.68366	2.0115	-0.301134	0.256249	2.14228	4.1105	4.56657	2.25447	4.79707	5.0749	4.92019	4.7209	5.24839	5.83514	5.47005	12.2143	32.463	1.59e-14	2.92e-14	3.10989	2.218	1.67835	0.100986	1.19579	0.947222	0.134131	1.37639	1.3945	0.10017	1.58231	2.6224	0.106495	3.325
1254	1.38102	4.0305	3.54469	0.759009	0.745422	3.35849	5.04761	7.43434	1.81362	5.45279	7.0422	7.86168	1.25699	2.9418	5.55604	7.35566	13.3235	42.2664	4.09e-16	1.25e-15	3.16382	2.28586	1.6512	1.95472	1.22705	0.654537	0.101026	1.34096	1.51424	0.10017	0.103274	2.63158	0.106495	3.39797
1255	1.82491	2.65229	2.70988	-1.77426	1.10575	2.86808	4.25026	5.02829	2.3742	4.26703	6.12371	6.6361	3.93236	5.01169	7.40991	7.14842	12.8423	50.4652	3.38e-17	1.79e-16	3.1603	2.19589	1.65231	2.5132	0.730875	0.103293	0.101026	1.21433	1.41819	0.10017	1.47758	2.58077	0.106495	3.32873
1256	0.100873	0.218581	0.315878	-0.382178	-0.292205	-0.258979	-0.102595	-0.212841	0.0212177	0.422248	0.559913	0.265121	0.977054	1.52862	1.4876	0.836017	15.8604	10.0533	5.32e-08	5.62e-08	2.80075	2.03573	0.101372	0.100986	0.10018	0.103293	0.101026	0.101889	0.100977	0.10017	0.103274	2.55761	0.106495	0.101254
1257	0.252884	0.610187	0.523198	-0.0912237	-0.0749777	0.0501183	0.225474	0.0529774	0.215454	0.596035	0.761843	0.411518	0.957465	1.47975	1.68141	0.897401	15.7819	8.45368	3.77e-07	3.91e-07	2.82455	2.07949	0.101372	1.41886	0.10018	0.103293	0.101026	0.101889	0.100977	0.10017	0.103274	2.57985	0.106495	0.101254
1259	3.04638	2.54587	1.84753	-1.24517	2.04519	2.91341	3.55184	2.27703	3.31725	4.28134	3.85191	2.02056	4.69215	4.66882	4.34795	2.50507	13.8417	41.9162	2.37e-16	8.22e-16	3.06739	2.2484	1.4673	1.37552	0.730451	0.355397	0.101026	1.39345	1.5372	0.10017	1.95511	2.67441	0.106495	3.17963
1261	-0.0664421	-0.298041	0.221232	0.401888	-0.133035	-0.374848	-0.549066	-0.775475	-0.42936	-1.01032	-0.885808	-1.00097	-1.56528	-0.99918	-0.253261	-0.936104	15.0145	6.973	2.98e-06	3.06e-06	2.93333	2.18043	0.101372	1.57341	0.685028	0.103293	0.101026	0.141721	1.30733	0.10017	0.103274	2.61331	0.106495	0.101254
1262	1.37943	2.61716	2.13229	-1.15568	-0.000365789	2.40284	4.18783	5.38843	1.43632	4.48843	5.64957	5.34882	3.11256	4.68957	5.12328	5.04171	14.0248	37.1789	2.44e-15	5.83e-15	3.10735	2.19891	1.67432	0.258975	0.965139	0.103293	0.101026	1.37833	0.904474	0.10017	0.953291	2.61946	0.106495	3.2517
1263	-0.228798	-0.528874	-0.121541	-0.242951	-0.351005	-0.670427	-0.861302	-1.26162	-0.492568	-0.965063	-1.09936	-1.32384	-0.684987	-0.33658	-0.382653	-0.927829	16.2109	5.35421	4.1e-05	4.19e-05	2.88806	2.11089	0.101372	0.100986	0.10018	0.103293	0.101026	0.724152	0.916551	0.10017	0.103274	2.58068	0.106495	0.101254
1264	2.72143	2.47759	2.10042	-3.10764	1.54341	2.84263	3.90196	2.67849	3.07338	4.30852	4.71599	2.23388	4.7633	5.44735	5.53253	2.86077	13.5762	39.3004	1.13e-15	2.96e-15	3.08066	2.21321	1.63307	1.65889	0.10018	0.103293	0.101026	1.34293	1.26867	0.618376	1.9688	2.67055	0.106495	3.21304
1265	3.17244	2.22917	0.974259	-2.44547	2.17985	2.65322	3.20906	3.1128	3.3868	4.38315	3.50136	2.88858	5.9207	5.75098	3.8279	2.58938	12.9151	29.6839	5.41e-14	8.72e-14	3.01609	2.16251	0.101372	0.100986	0.10018	0.683395	0.101026	1.03093	0.993826	0.10017	1.70791	2.60738	0.106495	3.04597
1266	0.900597	2.34676	0.593457	-2.04716	-0.178393	2.25139	3.01266	3.99698	1.18293	3.9997	3.62788	3.57835	2.12973	2.72614	2.36478	2.60461	14.7769	28.9715	7.53e-14	1.19e-13	3.0803	2.25962	1.18326	1.22499	0.10018	0.103293	0.101026	1.2613	1.43081	0.10017	0.838836	2.64942	0.128841	3.19191
1267	-0.295675	2.81951	3.07406	0.724289	-0.260615	2.94713	5.09483	6.7778	0.692593	4.52149	6.09951	6.8774	0.661299	2.95111	4.86356	6.36448	13.2919	50.0447	3.8e-17	1.98e-16	3.13791	2.21423	1.76929	0.100986	0.930477	0.103293	0.101026	0.898541	1.57073	0.10017	0.103274	2.59392	0.106495	3.29871
1268	0.4289	2.84191	3.0046	0.425408	-0.32443	2.7373	4.71435	6.39574	0.727879	4.50324	6.36791	6.52722	0.672037	2.4661	4.74143	5.69437	14.1806	48.5615	5.81e-17	2.79e-16	3.14202	2.27078	1.79051	1.86758	0.79287	0.590272	0.101026	1.3359	1.46597	0.10017	0.103274	2.62707	0.106495	3.30804
1269	-0.153566	2.57706	2.36555	-3.63039	-0.469574	2.52554	4.72682	6.03324	-0.0120149	4.41966	6.02856	5.4546	1.35858	3.61693	4.49298	4.61113	13.6271	53.8513	1.35e-17	9.16e-17	3.09586	2.21616	1.70732	0.100986	0.10018	0.103293	0.101026	1.26868	0.992989	0.10017	0.103274	2.61586	0.106495	3.20089
1271	-0.0239274	-0.097754	0.186213	-0.0971047	-0.275233	-0.407326	-0.387436	-0.522523	-0.22116	-0.160549	-0.131842	-0.328005	0.223796	0.720807	0.69556	0.190007	16.4329	4.15223	0.000392917	0.00039631	2.8406	2.07346	0.101372	0.206375	0.10018	0.103293	0.101026	0.101889	0.138266	0.10017	0.103274	2.57115	0.106495	0.281677
1272	0.0362926	0.505202	0.374391	-0.322794	-0.285893	0.0237791	0.160209	-0.278612	0.0215514	0.410521	0.296429	-0.0285053	0.725546	1.14058	1.092	0.414296	15.734	5.22402	5.17e-05	5.26e-05	2.84096	2.1207	0.101372	1.25061	0.10018	0.103293	0.101026	0.101889	0.100977	0.10017	0.103274	2.59522	0.106495	0.224732
1273	2.25512	3.24596	2.15928	-1.94415	1.58685	3.01776	3.83104	5.0862	2.41674	4.84864	5.36944	5.66833	4.05634	4.37014	5.50591	5.69686	14.4335	42.1879	4.2e-16	1.28e-15	3.12972	2.24324	1.45189	1.91248	1.11156	0.175782	0.101026	1.41546	1.40254	0.10017	1.20863	2.63778	0.106495	3.31783
1274	0.751615	2.49333	2.5567	-0.0557935	-0.189139	2.51393	4.79332	5.81059	0.705252	4.48439	5.94424	5.24508	1.09376	3.58985	4.04782	3.9127	14.2347	53.2459	1.58e-17	1e-16	3.10094	2.24736	1.65942	1.33388	0.10018	0.103293	0.101026	1.17913	0.500636	0.10017	0.103274	2.64857	0.106495	3.11581
1275	0.15354	0.470774	0.402347	-0.210441	-0.187703	-0.075729	0.045384	-0.125867	0.0768139	0.429553	0.532642	0.227076	0.887428	1.39069	1.42896	0.653378	16.3209	8.57618	3.22e-07	3.35e-07	2.82756	2.08978	0.101372	1.15959	0.10018	0.103293	0.101026	0.101889	0.100977	0.10017	0.103274	2.58787	0.106495	0.101254
1276	0.296694	2.27239	1.10735	-1.8668	-0.189966	2.42942	3.38428	4.49328	1.19204	3.59034	4.3527	4.88758	0.636089	2.39258	3.12546	4.6224	12.6441	33.0931	1.22e-14	2.32e-14	3.08729	2.12797	0.97547	1.67948	0.10018	0.103293	0.300034	0.434208	1.3292	0.10017	0.103274	2.57381	0.106495	3.16225
1277	-0.163666	0.273254	0.62408	-0.504872	-0.391553	-0.335488	0.0807863	-0.246986	-0.190011	0.522971	0.900119	0.212253	0.763453	1.57666	1.68287	0.263037	14.1216	8.84243	2.29e-07	2.39e-07	2.80787	2.02744	0.101372	0.100986	0.709608	0.103293	0.101026	0.101889	0.100977	0.10017	0.103274	2.57079	0.106495	0.101254
1278	2.74918	2.01105	1.33551	-1.51632	1.96304	2.52525	3.1252	2.43626	3.41715	3.93255	3.59966	1.30571	4.94262	4.5571	4.57286	2.81951	12.4292	23.1312	1.56e-12	2.02e-12	3.08426	2.28254	1.25981	1.35654	0.884997	0.103293	1.14019	1.4096	1.34195	0.929886	1.9612	2.71259	0.106495	3.22197
1279	1.68718	3.88128	4.93708	1.21068	0.516797	3.73785	5.99292	8.38174	0.928629	5.78022	8.69893	9.55029	1.8611	4.1665	7.69079	9.33663	13.9186	116.529	2.01e-22	5.74e-20	3.17799	2.23359	1.7816	2.37105	1.09763	0.103293	0.101026	1.27302	1.25202	0.10017	0.103274	2.57222	0.106495	3.37523
1280	1.88188	1.28907	0.0877167	-1.24321	0.92801	1.76573	1.75754	0.618012	2.01706	2.15346	1.17738	-1.19634	2.50564	1.84009	0.255947	-1.66954	13.1024	21.9147	2.26e-12	2.84e-12	3.04436	2.28124	1.27279	0.100986	0.652221	0.103293	0.29687	1.42857	1.48816	0.10017	1.7443	2.69798	0.106495	2.76978
1282	2.68307	3.47447	3.53837	-1.77113	1.81879	3.43309	5.00151	5.60621	2.59096	5.17795	6.7411	6.7195	4.45158	5.9915	7.84257	7.16598	13.2373	41.6662	4.99e-16	1.46e-15	3.14903	2.23355	1.82122	2.172	1.08169	0.103293	0.101026	1.17208	1.40472	0.100978	1.64591	2.60864	0.106495	3.33284
1283	-0.11384	0.480821	0.36834	-0.181364	-0.058485	0.341732	0.81169	-0.491918	-0.0779896	0.0828938	-0.683492	-2.14014	-0.818244	-1.47787	-2.43722	-4.02003	13.8317	19.9468	1.1e-11	1.3e-11	2.99896	2.227	1.34948	1.20111	0.10018	0.103293	0.101026	1.31443	0.956079	0.10017	0.587875	2.64187	0.106495	1.2777
1284	2.3804	2.18077	1.64344	-2.85325	1.22424	2.44569	3.58662	2.98164	2.89983	4.21722	4.48722	2.77203	4.43896	4.94564	4.63996	2.50713	13.8668	37.2108	2.41e-15	5.79e-15	3.07526	2.19034	1.50517	1.65757	0.10018	0.103293	0.101026	1.4474	1.17607	0.10017	1.7922	2.67688	0.106495	3.16833
1285	1.38979	2.17912	1.38538	-1.77577	0.251614	1.99999	3.64598	4.73152	1.63026	4.15024	4.72119	4.08379	3.29592	4.27092	3.69937	3.39854	13.5002	33.9562	8.56e-15	1.71e-14	3.07356	2.19042	1.31416	0.100986	0.536107	0.103293	0.101026	1.35919	0.100977	0.10017	0.85279	2.63565	0.106495	3.13406
1288	2.1838	3.08993	3.15098	-0.249428	0.567692	2.76166	4.94519	5.51056	1.95538	5.31629	6.33721	4.58778	4.50964	6.20317	5.31326	3.19535	12.7522	28.7086	8.53e-14	1.33e-13	3.08257	2.23398	1.74571	1.55379	0.10018	0.887482	0.101026	1.19829	0.100977	0.10017	1.27058	2.68004	0.106495	3.14014
1289	-0.0553833	-0.299564	-0.321367	-0.308016	-0.189841	-0.601224	-0.994515	-1.60291	-0.287326	-1.25722	-2.19884	-2.48362	-1.08331	-1.6365	-2.18973	-2.559	16.3824	34.854	5.97e-15	1.26e-14	2.95911	2.21266	0.101372	1.20462	0.10018	0.103293	0.101026	1.23781	1.01004	0.10017	0.103274	2.62461	0.106495	0.554318
1290	-0.748003	0.0687057	0.356501	0.130054	-0.384069	-0.113355	0.194282	-1.36879	-0.775892	-1.03432	-1.69958	-2.93433	-2.27296	-2.57657	-3.30992	-4.90144	14.6678	25.3213	4.65e-13	6.47e-13	3.01685	2.29182	1.39404	1.60384	0.10018	0.103293	0.348439	1.36389	1.43673	0.10017	0.103274	2.67208	0.106495	0.956998
1291	-0.115845	-0.195102	0.0405766	0.101237	-0.255776	-0.373611	-0.548452	-0.740967	-0.321231	-0.496824	-0.751561	-0.814278	-0.225309	0.0322309	-0.12759	-0.499348	15.9983	2.80489	0.00726755	0.00728546	2.88634	2.13978	0.101372	0.184189	0.10018	0.103293	0.101026	0.101889	0.88535	0.10017	0.103274	2.61045	0.106495	0.761135
1292	0.195845	0.54393	0.450278	-0.132459	-0.142714	-0.0128062	0.120435	-0.0494445	0.127168	0.483268	0.555627	0.267024	0.844271	1.32611	1.43025	0.692483	15.9621	6.90198	3.32e-06	3.41e-06	2.83252	2.10025	0.101372	1.36385	0.10018	0.103293	0.101026	0.101889	0.100977	0.10017	0.103274	2.59169	0.106495	0.101254
1293	-0.143077	-0.189216	0.248615	-0.00958187	-0.36474	-0.455645	-0.400127	-0.491448	-0.356822	-0.1783	-0.13141	-0.33075	0.106094	0.671695	0.761652	0.144865	15.4872	4.11459	0.000423837	0.000426923	2.82948	2.08284	0.101372	0.100986	0.10018	0.103293	0.101026	0.101889	0.510127	0.10017	0.103274	2.56888	0.106495	0.101254
1294	1.15122	2.65136	2.24888	-1.28554	0.15528	2.40923	4.10071	5.07044	1.36173	4.42624	5.40577	5.37328	2.84514	4.3753	5.22775	4.75067	14.1491	44.8215	1.8e-16	6.66e-16	3.12998	2.2694	1.72014	1.89523	0.11175	0.103293	0.101026	1.29337	1.38616	0.10017	1.12157	2.63532	0.106495	3.27406
1295	-0.279177	-0.383814	-0.230248	0.0436465	-0.154536	-0.50494	-0.98248	-1.78331	-0.506279	-1.45609	-2.47564	-2.74324	-1.86069	-2.53501	-2.80399	-3.39131	16.749	82.1939	1.3e-20	6.42e-19	2.98792	2.25496	0.152252	1.59307	0.10018	0.103293	0.101026	1.20469	1.36406	0.10017	0.103274	2.64716	0.106495	0.562728
1296	3.32199	3.17428	2.85337	-0.362318	2.07141	3.48929	4.72344	5.02578	2.92756	5.27167	5.97077	4.80145	5.04088	6.32124	5.76455	3.93233	12.2834	27.9848	1.21e-13	1.83e-13	3.07518	2.21543	1.51247	1.73788	0.10018	0.103293	0.101026	0.64795	0.171208	0.640798	1.55279	2.65061	0.106495	3.06959
1297	0.0403616	0.189415	0.234884	-0.440532	-0.335498	-0.312369	-0.227925	-0.341082	-0.0966878	0.297352	0.37831	0.0290078	0.807474	1.33229	1.27235	0.539099	16.032	8.48121	3.64e-07	3.78e-07	2.81282	2.0692	0.101372	0.144378	0.10018	0.103293	0.101026	0.101889	0.100977	0.10017	0.103274	2.56975	0.106495	0.101254
1299	3.16313	4.79903	4.60365	1.76371	1.38996	4.77357	6.35022	8.09082	3.16313	6.69715	8.59574	8.9535	2.52767	5.22236	7.75225	8.67865	12.8152	58.3623	4.29e-18	3.68e-17	3.15335	2.22917	1.56718	2.07226	1.25122	0.103293	0.101026	1.34309	0.239884	0.10017	0.318287	2.60378	0.106495	3.32531
1300	0.101674	-0.140255	-0.449756	0.00674869	0.15318	-0.25195	-1.10145	-1.57831	0.0665206	-1.13795	-2.53439	-3.28652	-1.55796	-2.68943	-3.68375	-4.17423	14.9073	45.438	1.48e-16	5.76e-16	2.97987	2.26019	0.101372	1.19021	0.401763	0.103293	0.101026	1.2942	1.30541	0.481687	0.103274	2.63604	0.106495	1.19879
1301	-0.537716	2.77361	2.46016	-0.984606	-0.539351	2.38136	4.55111	6.09952	0.24074	4.65751	6.18324	5.72973	-0.295141	3.27369	4.28751	4.22801	13.755	64.7233	9.81e-19	1.23e-17	3.12415	2.27466	1.77597	1.58183	0.10018	0.103293	0.101026	1.35815	1.08566	0.10017	0.14429	2.65223	0.477298	3.26459
1302	0.82344	2.84025	2.53473	-0.947172	-0.0124098	2.99916	4.16785	5.64404	1.53244	4.64218	6.11145	6.40453	2.15725	3.63314	5.33118	6.09303	12.7443	48.0815	6.68e-17	3.04e-16	3.15669	2.25267	1.44885	2.27152	0.168166	0.103293	0.816881	1.23089	1.16299	0.10017	0.376097	2.63961	0.106495	3.28085
1303	3.18887	3.44867	3.23855	-2.32275	1.76212	3.80237	4.97557	5.2283	3.36392	5.7253	6.25178	4.89263	5.6852	6.83935	6.17558	4.48915	13.1852	41.454	5.36e-16	1.56e-15	3.0788	2.23551	1.64704	0.253669	1.00163	0.524934	0.101026	1.30739	0.100977	0.10017	1.68581	2.66943	0.106495	3.21669
1304	0.571783	3.08802	3.33471	0.684799	0.314664	3.13146	5.04452	6.50502	0.979704	4.79094	6.82574	6.41943	1.06436	3.38769	5.22853	5.60332	13.4066	58.4869	4.16e-18	3.61e-17	3.11841	2.23323	1.77595	1.80711	0.822535	0.760164	0.101026	1.3214	1.04991	0.543197	0.103274	2.61766	0.106495	3.23049
1305	-0.663929	-0.989444	-0.303512	-0.00280277	-0.467685	-0.788295	-1.2571	-2.46754	-0.978642	-2.13948	-3.26204	-4.13326	-3.32487	-3.76819	-4.93882	-5.31343	15.8496	95.0849	1.57e-21	1.94e-19	2.98687	2.23822	0.534105	0.100986	0.10018	0.103293	0.101026	1.30907	1.6248	0.10017	0.103274	2.64367	0.106495	0.101254
1306	-0.249971	-0.660253	-0.345599	0.0765174	-0.0799453	-0.603161	-1.38305	-2.05056	-0.518874	-1.88521	-2.89311	-3.10207	-2.52021	-3.43377	-3.46074	-3.84479	16.2482	112.041	1.32e-22	4.62e-20	2.98857	2.26181	0.101372	1.56256	0.397223	0.103293	0.101026	1.23856	1.51523	0.10017	0.103274	2.63978	0.106495	0.101254
1307	0.908904	2.55564	2.32435	-0.390486	0.355694	2.51723	4.25536	5.30128	0.779363	4.1472	5.1903	4.97669	2.16798	3.42241	4.10685	4.47166	14.3327	37.9571	1.83e-15	4.5e-15	3.09342	2.20612	1.65988	0.100986	0.829197	0.386005	0.101026	1.17012	1.34012	0.10017	0.722784	2.62215	0.106495	3.20487
1309	-0.0134422	-0.155946	-0.247296	0.249031	0.12565	-0.0884872	-0.429938	-0.650845	-0.227057	-0.536466	-1.86486	-2.10843	-1.86563	-2.14792	-1.86486	-2.96006	12.3329	14.6825	3.91e-10	4.36e-10	2.98749	2.23921	0.101372	1.33252	0.10018	0.103293	0.101026	0.319091	1.41773	0.10017	0.103274	2.64905	0.734168	1.30073
1310	-0.3439	-0.221826	0.0159814	0.218723	-0.0237246	-0.191139	-0.546365	-1.83229	-0.502728	-1.23037	-2.44685	-3.41328	-2.26716	-3.08632	-4.00512	-4.89406	16.262	57.5932	5.18e-18	4.23e-17	3.00411	2.26505	0.875711	1.54585	0.10018	0.103293	0.101026	1.27405	1.51126	0.10017	0.103274	2.65501	0.106495	1.05967
1311	-0.31088	-0.519793	-0.602267	0.094734	-0.0502416	-0.243665	-1.22125	-2.14428	-0.384221	-1.5482	-3.00229	-4.078	-2.23033	-4.02296	-3.88452	-4.99073	12.9151	33.2471	6.35e-15	1.33e-14	2.98423	2.2177	0.670776	0.100986	0.10018	0.103293	1.04626	1.34692	1.60057	0.10017	0.751274	2.65122	0.106495	0.915683
1312	3.51732	3.27469	2.82246	-0.960106	2.58594	3.51245	4.76181	4.24857	3.56002	5.43916	5.99315	3.89978	5.69164	6.78497	6.22501	3.79215	13.388	44.7081	1.77e-16	6.62e-16	3.0875	2.27244	1.70297	1.59383	0.894505	0.103293	0.101026	1.43901	0.100977	0.10017	1.86449	2.68631	0.106495	3.189
1313	1.65157	3.32337	3.63148	-0.002817	-0.529162	2.71007	5.57215	7.45017	0.00282172	5.32141	7.38794	7.48079	1.65643	3.73013	6.05938	7.11344	12.9086	72.7552	1.59e-19	3.38e-18	3.13488	2.21856	1.74846	1.38887	1.1459	0.848717	0.101026	1.11289	0.87082	0.10017	0.103274	2.58634	0.106495	3.33044
1314	0.736988	3.34918	1.42405	-1.06246	-0.100491	3.34573	3.8846	5.41834	1.88048	4.7454	4.5361	5.46559	1.89779	1.73993	3.14195	4.79601	13.2168	21.9999	3.03e-12	3.77e-12	3.10538	2.21577	1.1844	0.100986	0.885039	0.446513	0.101026	1.28377	1.66097	0.412354	0.103274	2.60657	0.196944	3.30094
1315	-0.106417	2.49836	2.1114	-1.46953	-0.52722	2.24347	4.40761	5.8469	0.39384	4.35681	5.69746	5.62853	0.590124	3.0159	4.06837	4.73443	15.0629	62.2122	1.73e-18	1.89e-17	3.11493	2.2348	1.59382	1.08653	0.325203	0.103293	0.101026	1.19082	1.0671	0.10017	0.103274	2.61256	0.106495	3.24997
1317	0.424059	1.49069	2.124	-1.87847	-1.47251	1.82709	4.09248	5.36798	0.103731	3.58003	5.44099	5.43777	-0.0726476	3.2136	4.19064	4.89287	12.8606	44.724	1.85e-16	6.82e-16	3.08765	2.16432	1.57434	1.44413	0.481292	0.103293	0.101026	0.384674	0.100977	0.10017	0.103274	2.55503	0.106495	3.08001
1318	2.28991	2.64309	2.04341	-3.14453	1.48397	2.85581	3.80428	3.58203	2.79596	4.77452	4.93956	3.02517	4.81959	5.52071	5.05183	3.0112	13.6576	35.6534	4.36e-15	9.45e-15	3.05825	2.1921	1.60825	1.32442	0.697692	0.580011	0.101026	1.37693	1.07625	0.718133	1.83497	2.65999	0.706131	3.21722
1319	2.72357	3.03273	3.51384	-2.32318	1.76444	3.86889	4.9767	6.48936	2.72772	5.22681	7.75456	8.16196	5.4259	6.78304	8.46986	8.71998	12.4726	43.5287	6.96e-16	1.91e-15	3.14081	2.0761	1.40389	2.25697	1.08171	0.103293	0.101026	1.12732	0.173006	0.10017	1.20486	2.52052	0.106495	3.30889
1320	1.61332	2.64971	2.20002	-1.6052	0.0245848	2.65124	3.86557	4.87258	1.50519	4.64861	5.181	4.84866	3.08721	4.47569	5.00087	4.3725	14.1773	41.2321	5.78e-16	1.66e-15	3.11907	2.25288	1.70676	1.54834	0.395777	0.295425	0.101026	1.39184	1.52807	0.10017	1.24421	2.65291	0.136538	3.30782
1321	-0.87747	-0.408314	0.520695	0.223206	-0.25644	-0.0883799	-0.148166	-1.83598	-0.984703	-1.55681	-2.28769	-3.83766	-3.16848	-3.7101	-4.07163	-6.00919	13.2826	38.6395	8.86e-16	2.38e-15	3.00927	2.29026	1.38292	0.100986	1.02457	0.103293	0.101026	1.27004	1.61048	0.10017	0.103274	2.65667	0.11562	0.101254
1322	0.157971	1.69537	1.56549	-0.634578	-0.159374	1.75627	3.37275	4.29517	0.277253	3.02648	4.12532	3.22585	0.53641	2.37227	2.19015	1.86099	12.3987	23.5579	1.22e-12	1.6e-12	3.04741	2.21811	1.50882	0.100986	0.10018	0.103293	0.101026	0.641945	0.100977	0.10017	0.103274	2.62278	0.106495	2.80623
1323	-0.287091	-0.863416	-0.457252	0.198941	-0.0123048	-0.718081	-1.67086	-2.34041	-0.491219	-2.13722	-3.32139	-4.13175	-2.981	-3.63042	-4.8984	-5.83924	14.4583	72.027	9.12e-20	2.39e-18	2.99064	2.27592	0.101372	0.100986	0.898239	0.103293	0.101026	1.26474	1.62801	0.525372	0.103274	2.65314	0.106495	0.101254
1324	-0.624902	-0.773117	-0.173681	0.0122392	-0.431175	-0.647948	-0.96679	-2.21349	-0.927493	-1.93218	-3.0248	-3.68569	-2.93331	-3.40206	-4.40112	-4.63772	16.6835	129.215	1.64e-23	9.8e-21	2.98477	2.24074	0.72927	0.100986	0.10018	0.103293	0.101026	1.20729	1.55821	0.10017	0.103274	2.64376	0.106495	0.437318
1325	0.0363686	-0.101389	-0.0178001	-0.180068	-0.125311	-0.397666	-0.666507	-1.08282	-0.131301	-0.705121	-1.04439	-1.2976	-0.449739	-0.491361	-0.465785	-1.13192	16.2634	7.90644	7.85e-07	8.09e-07	2.92318	2.16166	0.101372	1.54608	0.10018	0.103293	0.101026	0.959517	0.699021	0.10017	0.103274	2.61021	0.106495	0.101254
1326	-0.524767	-0.258345	0.271874	0.257768	-0.274354	-0.311112	-0.40481	-1.92541	-0.971364	-1.41016	-2.32452	-2.92909	-2.48921	-2.89831	-3.06205	-3.7322	15.0167	67.3183	2.46e-19	4.39e-18	2.9984	2.27899	1.03193	1.675	0.692299	0.103293	0.101026	0.789162	1.47921	0.10017	0.103274	2.6475	0.106495	0.101254
1327	-0.755366	-0.551147	0.340463	0.304005	-0.44262	-0.427566	-0.452948	-1.97668	-1.23077	-1.58521	-2.52986	-3.06649	-3.20544	-3.25368	-3.61476	-3.8649	15.0206	67.9272	2.16e-19	4.11e-18	2.99923	2.25659	1.11565	1.59736	0.267392	0.103293	0.101026	0.804132	1.64433	0.10017	0.103274	2.65157	0.106495	0.101254
1328	-0.873967	-0.723047	-0.112017	0.0315395	-0.547885	-0.64362	-0.909594	-2.47853	-1.18517	-1.96026	-3.04472	-3.93861	-3.12459	-3.44759	-5.02072	-5.51955	15.6089	79.0786	5.18e-20	1.67e-18	2.99808	2.26237	1.01733	1.19693	0.10018	0.103293	0.600609	1.14031	1.59038	0.10017	0.103274	2.64699	0.106495	0.101254
1329	0.10945	-0.0849922	0.00807416	-0.200569	-0.155116	-0.359045	-0.544528	-0.824873	-0.0635831	-0.322991	-0.476873	-0.79401	0.11308	0.396607	0.264998	-0.192652	16.0741	3.91846	0.000632321	0.00063645	2.83353	2.0863	0.101372	0.134585	0.10018	0.103293	0.101026	0.35926	0.405063	0.10017	0.103274	2.56208	0.106495	0.706623
1330	-0.711925	-0.242119	0.278806	0.0742209	-0.482547	-0.222348	-0.0167106	-1.30944	-0.986609	-0.975379	-1.95477	-3.06777	-2.67891	-2.73539	-3.91361	-4.46574	15.0183	28.1213	1.13e-13	1.72e-13	2.99666	2.25099	1.24167	0.262636	0.10018	0.103293	0.101026	1.05084	1.47972	0.10017	0.103274	2.64577	0.106495	1.14759
1331	-0.0456846	0.470864	0.139999	-0.668637	-0.375111	-0.0371808	0.510549	-0.55951	-0.135759	0.0196977	-0.789117	-1.66824	-0.417527	-0.789348	-1.72379	-2.09777	13.76	9.32553	1.26e-07	1.32e-07	2.97992	2.219	1.12167	0.965943	0.10018	0.103293	0.101026	1.1645	0.177893	0.10017	0.103274	2.61052	0.106495	1.26152
1332	-0.528775	-0.523018	0.175534	0.19855	-0.120676	-0.293274	-0.708369	-2.23187	-0.698551	-1.58743	-2.71722	-4.10526	-2.99698	-3.4875	-4.76929	-5.9953	15.3012	52.6636	1.85e-17	1.15e-16	2.9959	2.26503	1.09485	0.100986	0.88188	0.103293	0.101026	1.34198	1.61864	0.10017	0.103274	2.64974	0.106495	0.714277
1333	-0.372561	2.50803	1.5416	-1.92668	-0.65052	2.35119	3.90878	5.0997	0.236809	3.98966	4.75091	4.58836	0.599245	2.04584	2.97011	3.3674	13.7064	36.3007	3.4e-15	7.88e-15	3.09107	2.25541	1.57556	0.100986	0.10018	0.103293	0.101026	1.24193	1.34229	0.10017	0.103274	2.63035	0.401959	3.18824
1334	-0.546206	-0.815846	-0.691293	-0.130101	-0.236989	-0.584384	-1.34075	-2.29132	-0.693384	-2.13365	-3.41666	-3.75631	-2.93959	-3.6762	-5.63337	-5.9762	13.7472	60.2785	1.24e-18	1.44e-17	2.98488	2.24741	0.288579	0.100986	0.707713	0.103293	0.679324	1.11592	1.5729	0.10017	0.103274	2.64098	0.73699	0.101254
1335	-0.952062	-0.126615	0.0941605	0.270399	-0.187633	0.0350928	0.0553375	-1.36097	-1.07853	-0.936168	-1.77438	-3.13842	-2.90736	-3.2751	-3.77241	-5.95649	12.4221	18.7849	2.4e-11	2.78e-11	3.02924	2.32339	1.48577	1.16079	0.10018	0.103293	0.280439	1.45257	1.64588	0.10017	0.103274	2.68893	0.862069	1.12707
1336	-0.431737	-0.783256	-0.393655	-0.119214	-0.402515	-0.805889	-1.24652	-1.83608	-0.763567	-1.85773	-2.48697	-2.67123	-2.1479	-2.39317	-2.5287	-2.7717	16.4042	59.9269	1.35e-18	1.54e-17	2.96113	2.22392	0.101372	0.100986	0.10018	0.103293	0.101026	1.10742	1.39245	0.10017	0.103274	2.6317	0.106495	0.101254
1337	0.0250901	-0.371939	-0.310237	-0.241537	-0.0878046	-0.451729	-1.10238	-1.99521	-0.178534	-1.49537	-2.57085	-3.31827	-1.51315	-2.461	-3.59065	-4.34095	15.0324	58.5977	1.87e-18	2.02e-17	2.97768	2.23748	0.238201	0.100986	0.906353	0.103293	0.101026	1.35344	1.20227	0.10017	0.103274	2.63573	0.106495	0.641853
1339	0.0292086	0.130078	0.171118	-0.489367	-0.347005	-0.356892	-0.277779	-0.409779	-0.116299	0.211296	0.276015	-0.0880452	0.711585	1.20617	1.14009	0.404276	16.1077	7.47829	1.43e-06	1.47e-06	2.81864	2.07376	0.101372	0.140853	0.10018	0.103293	0.101026	0.101889	0.100977	0.10017	0.103274	2.57229	0.106495	0.101254
1340	-0.505248	-0.524509	-0.230813	-0.13371	-0.404868	-0.643602	-0.985711	-2.3204	-0.810326	-1.82118	-3.00214	-4.20022	-2.42241	-3.22197	-4.83232	-6.15582	15.3993	87.6271	5.06e-21	3.99e-19	2.99757	2.27589	0.853136	0.100986	0.658495	0.103293	0.319143	1.30555	1.40692	0.10017	0.103274	2.64557	0.106495	0.101254
1342	0.533827	0.849589	-0.721446	-0.514342	0.0583535	0.873043	1.22171	1.64924	0.442026	1.62773	0.500137	0.159951	0.0591737	-0.000890351	-1.1772	-1.36134	12.8275	12.4309	3.21e-09	3.49e-09	3.03004	2.27319	0.101372	0.100986	0.10018	0.103293	0.101026	1.41949	1.14542	0.10017	0.103274	2.64731	0.106495	2.60226
1343	-0.821538	-0.324348	0.0814738	0.185298	-0.361897	-0.330261	-0.477724	-2.09244	-1.0508	-1.48586	-2.60565	-3.83292	-2.94965	-3.30411	-4.31067	-6.179	15.7784	49.4312	4.52e-17	2.28e-16	3.01441	2.30446	1.2198	1.41809	0.10018	0.103293	0.142685	1.35327	1.58772	0.10017	0.103274	2.67097	0.106495	0.771945
1344	-0.578412	-0.373899	0.0439502	0.0633538	-0.312688	-0.449686	-0.644084	-2.02175	-0.868773	-1.47101	-2.76987	-3.42776	-2.40693	-3.15268	-3.99749	-4.92454	16.1311	80.7421	2.38e-20	9.53e-19	3.00213	2.27901	0.97909	1.62907	0.10018	0.103293	0.101026	1.27254	1.45339	0.10017	0.103274	2.65506	0.106495	0.101254
1346	-0.259345	-0.0249429	0.335297	0.153329	-0.0336463	0.228929	0.13273	-0.991762	-0.4408	-0.705181	-1.59389	-3.23482	-1.6933	-2.31784	-2.97719	-4.7213	12.5571	15.2054	3.58e-10	4e-10	3.00695	2.28297	1.22328	0.100986	0.284653	0.868944	0.101026	1.38714	1.4737	0.10017	0.103274	2.65874	0.106495	1.24717
1347	0.16684	2.26912	1.77914	-0.245426	-0.202565	2.40569	3.87644	4.88694	0.394562	3.72065	4.88683	4.76574	0.284846	1.74412	3.20577	3.78865	14.7845	44.7098	1.86e-16	6.83e-16	3.11174	2.25686	1.66892	1.59193	0.370309	0.103293	0.101026	1.30846	1.49064	0.10017	0.103274	2.63709	0.106495	3.20584
1348	0.137311	-0.00688645	-0.676243	-0.854315	-0.343	-0.379724	-0.758954	-1.10732	-0.0185466	-0.505311	-1.55268	-1.81003	-0.0493836	-0.579608	-1.40282	-1.7235	14.2562	6.41239	7.05e-06	7.21e-06	2.93769	2.20237	0.101372	0.100986	0.10018	0.103293	0.101026	1.09532	0.100977	0.10017	0.103274	2.61447	0.106495	1.15192
1349	-0.186543	-0.498046	-0.446173	-0.0745662	-0.159096	-0.414004	-1.03691	-1.79611	-0.330227	-1.37428	-2.78264	-3.35655	-1.95685	-2.70597	-3.99297	-4.10693	15.6462	49.8152	4.05e-17	2.11e-16	2.97872	2.23426	0.101372	0.100986	0.10018	0.103293	0.101026	1.29433	1.41472	0.10017	0.103274	2.63513	0.106495	1.13036
1350	-0.385906	-0.438103	-0.184605	-0.0235949	-0.0727868	-0.231976	-0.867848	-2.15179	-0.421354	-1.58162	-2.97932	-3.86967	-2.55771	-3.39239	-4.49126	-6.45816	14.6072	70.8428	1.16e-19	2.69e-18	2.98518	2.23029	0.889292	0.100986	0.814954	0.103293	0.101026	1.28645	1.52269	0.10017	0.103274	2.62999	0.609253	0.593955
1351	-0.523195	-0.163557	0.282089	0.0289938	-0.383979	-0.214625	-0.122243	-1.55489	-0.770898	-1.10682	-2.19268	-3.38153	-2.16545	-2.77707	-3.88252	-4.7999	15.3229	37.2254	2.4e-15	5.77e-15	2.99387	2.24467	1.25275	0.100986	0.384587	0.103293	0.101026	1.1948	1.39614	0.10017	0.190129	2.64318	0.106495	0.943124
1352	-0.885948	-0.204545	0.55525	0.232156	-0.429024	-0.163862	0.156839	-1.39295	-1.09401	-1.16507	-1.64097	-3.06295	-3.01762	-2.96331	-3.7673	-5.23384	14.684	34.8671	5.94e-15	1.25e-14	3.01258	2.26407	1.45945	1.47273	0.10018	0.103293	0.101026	1.29523	1.56711	0.10017	0.103274	2.66283	0.106495	0.878991
1353	1.13375	2.32692	1.4452	-1.74057	0.37602	2.28405	3.43024	4.77896	1.67223	4.19508	4.36223	4.12674	2.82646	3.73748	3.31232	3.31617	13.3208	34.5168	6.83e-15	1.41e-14	3.0824	2.22823	1.15711	1.03343	0.905604	0.685983	0.101026	1.31975	0.100977	0.10017	0.757076	2.63805	0.106495	3.19611
1354	-0.00740502	-0.405218	-0.502205	0.262955	0.428174	-0.52893	-1.85778	-2.20312	-0.160742	-2.05456	-3.42371	-3.92261	-2.81148	-3.66792	-5.68023	-7.4485	12.3713	35.5591	3.11e-15	7.27e-15	2.99634	2.29185	0.101372	0.100986	0.87901	0.455275	0.101026	1.27889	1.58183	0.870135	0.422954	2.65776	0.106495	0.101254
1355	0.096511	0.234845	0.136448	-0.675633	-0.168388	-0.371138	-0.237951	-0.807541	-0.076579	-0.142361	-0.0505634	-0.778131	0.0912396	0.433814	0.671082	-0.898743	14.4639	4.4808	0.000205546	0.000208535	2.87238	2.1518	0.101372	0.504982	0.863148	0.103293	0.101026	0.531466	0.100977	0.10017	0.103274	2.60237	0.106495	0.101254
1356	-0.507237	0.036904	0.599858	0.415403	-0.0572175	0.176745	0.230835	-1.23478	-0.549604	-0.92935	-1.35096	-2.81118	-2.71873	-3.08519	-3.44018	-4.8169	13.2615	18.727	2.5e-11	2.89e-11	3.02409	2.29659	1.46002	1.51236	0.931411	0.414856	0.101026	1.39835	1.67973	0.10017	0.103274	2.67739	0.106495	1.14508
1358	-0.689804	-0.749519	-0.237127	-0.092871	-0.520672	-0.703423	-1.00958	-2.25719	-0.986025	-1.93189	-3.12366	-4.03616	-2.92564	-3.45823	-4.83858	-5.4599	16.1722	94.8865	2.77e-21	2.72e-19	2.98228	2.24334	0.842808	0.100986	0.10018	0.103293	0.101026	1.32609	1.5139	0.10017	0.103274	2.64366	0.106495	0.101254
1359	-0.61435	-0.742492	-0.302559	-0.0707006	-0.410733	-0.652037	-1.13819	-2.37442	-0.862898	-1.92361	-3.22834	-4.21518	-2.86797	-3.60416	-5.22635	-5.71024	16.3021	78.6291	6e-20	1.83e-18	2.98795	2.25591	0.767716	0.212937	0.10018	0.103293	0.101026	1.32194	1.53333	0.10017	0.390016	2.64362	0.106495	0.500226
1360	0.565136	2.71727	2.29168	-1.79729	0.380228	2.4738	4.587	5.75963	0.535584	4.36743	5.71058	4.88649	1.78823	3.78873	4.00879	3.83086	12.9126	37.1927	2.43e-15	5.81e-15	3.06313	2.20755	1.58901	0.100986	0.10018	0.103293	0.101026	1.24521	0.135025	0.10017	0.103274	2.59951	0.106495	3.06675
1361	0.0934839	0.351745	0.339358	-0.331637	-0.256511	-0.107714	-0.0238173	-0.151851	0.0372359	0.408466	0.527855	0.197624	0.879104	1.38394	1.41877	0.672149	16.4722	9.46035	1.07e-07	1.13e-07	2.81777	2.07271	0.101372	0.938175	0.10018	0.103293	0.101026	0.101889	0.100977	0.10017	0.103274	2.57629	0.106495	0.101254
1362	-0.720942	-1.01924	-0.229981	0.107522	-0.591052	-0.763924	-1.11991	-1.42218	-1.05041	-1.86961	-2.10635	-1.89436	-2.74591	-2.20741	-1.71835	-1.61296	15.0338	20.4353	8.01e-12	9.6e-12	2.95626	2.21729	0.101372	0.100986	0.10018	0.103293	0.101026	0.373442	1.51695	0.10017	0.103274	2.61946	0.106495	0.101254
1363	-0.725328	-0.418402	0.364992	0.206762	-0.552741	-0.505689	-0.301223	-1.30289	-1.24726	-1.38605	-1.81216	-1.83	-2.48697	-2.18283	-1.8799	-2.19187	15.2772	30.4794	2.42e-14	4.22e-14	2.97991	2.22981	0.95491	1.49551	0.10018	0.103293	0.101026	0.453294	1.42802	0.10017	0.103274	2.64183	0.106495	0.101254
1364	-0.329123	-0.926069	-0.247406	0.0286362	-0.213996	-0.781263	-1.18722	-1.75119	-0.590594	-1.92806	-2.47037	-2.52089	-2.43174	-2.66306	-2.84634	-2.45903	14.1348	36.6731	1.59e-15	3.98e-15	2.95019	2.14599	0.101372	0.100986	0.10018	0.103293	0.101026	1.03215	1.46751	0.714107	0.103274	2.60417	0.106495	0.101254
1365	-0.394883	-0.391467	0.423392	0.172532	-0.0380536	-0.207318	-0.308866	-2.04239	-0.417924	-1.29537	-2.17439	-3.59558	-2.44573	-3.02174	-4.0307	-5.59927	14.3263	53.5543	6.92e-18	5.44e-17	2.98182	2.1632	1.18665	0.630869	0.970687	0.103293	0.223965	1.1567	1.5602	0.10017	0.103274	2.62984	0.106495	0.805055
1366	0.599761	2.69572	3.10753	-0.0512654	-0.207507	2.61101	5.01063	6.28695	0.815277	4.83576	6.87782	6.22368	0.781694	4.1966	5.26616	5.17735	13.6525	66.9012	6.11e-19	8.28e-18	3.12023	2.23342	1.72121	1.75863	0.104044	0.103293	0.101026	1.26716	0.255927	0.10017	0.103274	2.63558	0.106495	3.20138
1367	-0.953942	-0.452999	0.303247	0.246892	-0.50482	-0.370732	-0.352906	-2.03201	-1.13351	-1.57217	-2.43326	-3.76882	-3.48339	-3.42128	-4.15333	-5.74336	15.3321	43.2379	2.97e-16	9.84e-16	3.01217	2.28108	1.36653	0.877046	0.10018	0.103293	0.114734	1.35271	1.63131	0.279389	0.103274	2.6664	0.106495	0.624524
1368	-0.527759	0.167532	0.096884	-0.675007	-0.892883	-0.428226	0.066015	-1.2838	-0.848542	-0.928767	-2.35855	-2.91015	-0.881179	-1.94694	-3.28414	-4.25348	13.0592	22.1313	1.76e-12	2.26e-12	2.99212	2.2657	1.31161	0.100986	0.443101	0.103293	0.101026	1.32625	0.401527	0.10017	0.103274	2.63981	0.106495	0.101254
1369	0.742978	2.65734	1.10468	-1.34786	0.0630546	2.54104	3.66921	4.83618	1.02384	4.16868	4.41422	4.60952	1.0669	2.15937	2.80745	3.82416	15.2479	38.4803	1.51e-15	3.82e-15	3.09399	2.24068	1.16921	1.26365	0.604388	0.103293	0.101026	1.28415	1.26684	0.10017	0.103274	2.62608	0.106495	3.20502
1370	-0.510194	-0.938229	-0.356973	0.0696655	-0.364563	-0.7863	-1.39346	-1.8778	-0.8259	-2.09178	-2.7612	-2.76035	-2.8827	-3.15208	-3.09064	-3.09592	16.4053	89.125	3.94e-21	3.41e-19	2.97826	2.2325	0.101372	1.03125	0.10018	0.103293	0.101026	1.04091	1.55005	0.10017	0.103274	2.64098	0.106495	0.101254
1371	1.86489	2.6633	2.3291	-0.444135	0.688713	2.63939	4.13633	4.61618	2.18421	4.68904	5.47169	4.21083	3.95798	5.29189	4.83792	3.32704	13.7873	39.9057	9.12e-16	2.44e-15	3.08394	2.24165	1.57064	1.68642	0.10018	0.103293	0.530256	1.27525	0.100977	0.10017	1.15208	2.66296	0.106495	3.10523
1372	-0.0999455	0.330109	0.116526	-0.642715	-0.521017	-0.261801	-0.132821	-0.837433	-0.222502	-0.116694	-0.436353	-0.7507	0.127845	0.302912	0.346994	-0.524192	15.272	3.92361	0.000625637	0.000629797	2.88853	2.17359	0.101372	1.17368	0.10018	0.103293	0.101026	0.433854	0.100977	0.10017	0.103274	2.6022	0.106495	0.101254
1373	1.01697	2.1152	1.04748	-0.749599	0.224672	1.81972	3.08484	3.62846	1.20547	3.20775	3.34972	2.69621	1.25676	2.02317	1.56249	1.30046	13.8992	25.0838	5.28e-13	7.27e-13	3.0384	2.23109	1.08972	1.23177	0.10018	0.103293	0.101026	1.18669	0.243557	0.10017	0.103274	2.62797	0.106495	2.8124
1374	-0.203751	-0.247788	0.186924	0.116268	-0.302885	-0.431721	-0.436994	-0.60225	-0.443265	-0.511997	-0.414015	-0.572099	-0.450132	0.116791	0.331122	-0.149032	16.3593	2.65953	0.0102044	0.0102254	2.86729	2.12345	0.101372	1.20247	0.10018	0.103293	0.101026	0.101889	0.869429	0.10017	0.103274	2.58986	0.106495	0.101254
1375	-0.481779	-0.125143	0.0647341	-0.101468	-0.342917	-0.380704	-0.225567	-1.60617	-0.783838	-1.22638	-2.88121	-3.23535	-1.96563	-2.77893	-3.55216	-3.18254	12.3193	20.4183	5.24e-12	6.38e-12	2.98926	2.23729	0.946383	0.100986	0.10018	0.103293	0.735528	0.323205	1.29187	0.10017	0.865031	2.64234	0.106495	0.737219
1377	0.0566709	0.35673	0.342795	-0.364141	-0.271456	-0.11617	-0.0335907	-0.194861	-0.0113303	0.380939	0.486321	0.146384	0.824822	1.32649	1.36875	0.631484	16.473	8.96087	1.97e-07	2.06e-07	2.81986	2.07596	0.101372	0.895291	0.10018	0.103293	0.101026	0.101889	0.100977	0.10017	0.103274	2.5736	0.106495	0.101254
1378	1.76435	3.38222	2.16128	-1.0078	0.538221	3.52827	4.18267	5.70555	2.02441	4.85496	5.27613	6.38488	2.11063	3.40224	4.40274	6.30329	13.8365	37.5855	2.1e-15	5.09e-15	3.1076	2.13669	0.116334	1.8076	0.684746	0.103293	0.101026	1.0395	1.1131	0.10017	0.103274	2.55637	0.106495	3.21749
1379	-0.295368	0.0478015	0.391508	0.264841	-0.00102252	-0.0296466	-0.261565	-1.87205	-0.434727	-1.09517	-2.13758	-3.5926	-2.21947	-3.16402	-4.11544	-5.74691	15.0226	56.143	7.45e-18	5.79e-17	3.00704	2.26717	1.22833	1.46148	0.911542	0.103293	0.101026	1.19355	1.46639	0.10017	0.512131	2.65489	0.106495	0.328481
1380	-0.433082	-0.845232	-0.424036	-0.069369	-0.356015	-0.818633	-1.33055	-2.02102	-0.770622	-1.99617	-2.85691	-3.13202	-2.53443	-2.96704	-3.35225	-3.45323	16.3868	95.6459	1.38e-21	1.77e-19	2.97258	2.23008	0.101372	0.100986	0.10018	0.103293	0.101026	1.22195	1.48136	0.10017	0.103274	2.63431	0.106495	0.101254
1381	-0.39146	-0.324334	0.223306	0.0863793	-0.287273	-0.435422	-0.456177	-1.63048	-0.733692	-1.2817	-2.13021	-2.56519	-1.99462	-2.38813	-2.51892	-3.1884	16.4472	74.9584	5.07e-20	1.65e-18	2.98003	2.2338	0.899866	1.24641	0.431524	0.103293	0.101026	1.03882	1.33934	0.10017	0.103274	2.63874	0.106495	0.101254
1382	-0.159286	-0.0376271	-0.34795	-0.083276	0.106666	-0.144337	-0.503887	-1.58056	-0.0983734	-1.19183	-2.51553	-4.02077	-2.29242	-3.2046	-4.4201	-5.39619	12.7936	25.4581	4.33e-13	6.08e-13	3.00714	2.27358	0.964032	1.74469	0.908678	0.103293	0.740255	1.3893	1.42365	0.10017	0.103274	2.65797	0.858963	0.101254
1383	0.28054	0.168939	-0.527757	-1.10222	-0.0120747	-0.292041	-1.01624	-1.25243	0.387564	-0.60326	-1.42368	-2.10327	-0.0402332	-1.04379	-1.73078	-2.34726	13.7683	13.5289	1.26e-09	1.38e-09	2.96468	2.21606	0.101372	0.900143	0.795718	0.103293	0.101026	1.15525	0.100977	0.155848	0.103274	2.62031	0.106495	1.05972
1384	-0.43016	-0.639852	-0.135227	0.117917	-0.435641	-0.648648	-0.843647	-1.15968	-0.838391	-1.2949	-1.4828	-1.48221	-1.61976	-1.14172	-1.09072	-1.35511	15.1174	10.2207	4.2e-08	4.46e-08	2.93901	2.19389	0.101372	0.100986	0.10018	0.103293	0.101026	0.414012	1.25757	0.337597	0.103274	2.62646	0.106495	0.101254
1385	-0.0710896	0.370642	0.423237	-0.0822093	-0.317816	-0.11178	0.100281	-0.383405	-0.259452	0.0906652	-0.0895842	-0.382684	0.285671	0.620105	0.621695	-0.0403595	15.9025	3.20942	0.00289497	0.00290846	2.87308	2.14752	0.101372	1.37544	0.10018	0.103293	0.101026	0.101889	0.100977	0.10017	0.103274	2.607	0.106495	0.435188
1386	0.158602	0.606688	0.339141	-0.333135	-0.213828	0.013093	0.204716	-0.229026	0.118915	0.268506	0.156938	-0.280463	0.580337	0.709586	0.79343	0.045042	14.511	2.86346	0.00634652	0.00636475	2.87851	2.16156	0.101372	1.56835	0.130924	0.103293	0.101026	0.101889	0.100977	0.10017	0.103274	2.61127	0.106495	0.83551
1387	-0.747681	-0.437515	-0.239318	-0.0481968	-0.327531	-0.420809	-0.771409	-2.39772	-0.845689	-1.45723	-3.06493	-4.27366	-2.77326	-3.72237	-4.84889	-6.34188	14.0048	44.5713	1.94e-16	7.06e-16	2.9919	2.25569	1.17843	1.26925	0.10018	0.103293	0.642146	1.2548	1.57699	0.10017	0.904217	2.64461	0.106495	0.101254
1388	-1.07863	-0.408297	0.528343	-0.168498	-0.636381	-0.52637	-0.0332575	-1.5368	-1.81189	-1.23378	-2.12371	-2.86122	-3.09549	-2.86912	-3.83152	-4.17551	12.6603	27.2162	1.04e-13	1.59e-13	2.99976	2.23676	1.42128	1.3326	0.10018	0.103293	0.101026	0.408954	1.52429	0.10017	0.103274	2.64441	0.47704	0.101254
1389	-0.120653	-0.478958	-0.343761	-0.0756783	-0.113815	-0.542166	-1.12524	-1.82898	-0.337003	-1.4725	-2.54786	-2.94307	-1.67904	-2.46409	-2.99369	-3.27773	16.8234	76.3098	8.43e-20	2.32e-18	2.97405	2.23351	0.101372	1.04303	0.161663	0.103293	0.101026	1.22843	1.31588	0.10017	0.103274	2.6337	0.106495	0.85107
1390	-0.143373	-0.653973	-0.330279	0.0577445	0.0307474	-0.591839	-1.41779	-2.06127	-0.371462	-1.86811	-2.95146	-3.43232	-2.39314	-3.50213	-3.77839	-4.28602	15.9145	101.678	5.58e-22	9.63e-20	2.98769	2.24043	0.101372	1.38359	0.559244	0.103293	0.101026	1.2505	1.50563	0.287927	0.103274	2.63715	0.106495	0.101254
1392	0.095702	-0.187203	0.114618	0.406064	0.156688	-0.362754	-0.58058	-0.95883	-0.224901	-1.02944	-1.22385	-1.23698	-1.50941	-1.40326	-0.730326	-1.43431	14.0938	10.7612	1.83e-08	1.96e-08	2.95702	2.20038	0.101372	1.66011	0.791686	0.103293	0.101026	0.137301	1.30546	0.38309	0.103274	2.63197	0.106495	0.596523
1393	0.961462	2.58249	1.8135	-0.81762	0.0155844	2.38394	3.80862	4.97276	0.837905	4.23135	4.82646	4.44716	0.972229	2.65491	3.12217	3.41956	13.7268	35.8907	3.98e-15	8.95e-15	3.09571	2.27518	1.3796	1.37412	0.899016	0.103293	0.101026	1.27697	0.2411	0.10017	0.103274	2.65272	0.106495	3.12301
1394	-0.321718	-0.730121	0.073106	0.339131	-0.21877	-0.444422	-0.776718	-1.67387	-0.558329	-1.64783	-2.50033	-2.59579	-2.7407	-3.15897	-2.7902	-2.48871	14.2808	40.7808	3.5e-16	1.11e-15	2.96989	2.16387	0.479321	0.746975	0.164168	0.103293	0.101026	0.283391	1.6106	0.10017	0.669898	2.62581	0.106495	0.825806
1395	1.01212	2.22248	0.654906	-1.85085	0.179565	2.1556	3.12311	4.12371	1.17303	3.72881	3.51313	3.72125	1.71995	2.36802	2.24195	3.033	14.7192	32.2972	1.71e-14	3.1e-14	3.06966	2.22494	0.969291	0.613846	0.80535	0.103293	0.101026	1.25272	1.10778	0.10017	0.282153	2.62521	0.106495	3.11284
1396	-0.364312	-0.582645	-0.138547	0.264453	-0.126355	-0.463246	-1.02136	-1.79893	-0.667844	-1.68568	-2.54546	-2.72057	-2.70967	-3.06148	-2.8396	-3.25765	16.56	112.753	1.2e-22	4.62e-20	2.98887	2.26335	0.202236	1.55258	0.420697	0.103293	0.101026	0.984966	1.53716	0.10017	0.103274	2.64797	0.106495	0.344544
1397	-0.255671	-0.501472	-0.48893	-0.114661	-0.108261	-0.576335	-1.27469	-1.87175	-0.422941	-1.66171	-2.98277	-3.38716	-2.08634	-3.20494	-4.08916	-4.71936	16.2002	71.8531	2.19e-19	4.14e-18	2.98499	2.25972	0.101372	1.26052	0.10018	0.103293	0.101026	1.28093	1.35738	0.10017	0.103274	2.64846	0.228246	0.520062
1398	-0.474429	-0.667241	-0.345312	-0.191603	-0.428194	-0.697885	-1.102	-2.14306	-0.780958	-1.76518	-2.97536	-3.68975	-2.36672	-3.02719	-4.19931	-4.47093	16.5178	89.3024	9.56e-21	5.77e-19	2.98176	2.24042	0.52367	0.100986	0.10018	0.103293	0.101026	1.29844	1.41656	0.10017	0.103274	2.63423	0.106495	0.633023
1399	0.109724	0.235792	0.258395	-0.436216	-0.252692	-0.234653	-0.192728	-0.350924	0.0114988	0.339403	0.394348	0.0364739	0.838265	1.33836	1.27014	0.565162	16.1147	8.77496	2.49e-07	2.6e-07	2.81243	2.07008	0.101372	0.129399	0.10018	0.103293	0.101026	0.101889	0.100977	0.10017	0.103274	2.56843	0.106495	0.140684
1400	-0.0298767	0.188792	0.324065	0.0306256	-0.252743	-0.201563	-0.157128	-0.30072	-0.156177	-0.0196067	0.0422867	-0.187325	0.208931	0.684553	0.863247	0.227523	16.1095	3.1235	0.00350912	0.0035234	2.85582	2.12121	0.101372	1.4536	0.10018	0.103293	0.101026	0.101889	0.100977	0.10017	0.103274	2.59636	0.106495	0.101254
1401	-0.38998	-0.555374	-0.304568	-0.208499	-0.414866	-0.635448	-1.00099	-1.91848	-0.692917	-1.54053	-2.58298	-3.00377	-1.86415	-2.32372	-3.11507	-3.44119	16.5303	65.9609	4.06e-19	6.01e-18	2.9676	2.22866	0.352739	0.100986	0.10018	0.103293	0.101026	1.2222	1.30318	0.10017	0.103274	2.62909	0.106495	0.739778
1402	-0.51414	-0.429734	-0.25402	0.0235043	-0.332115	-0.434243	-1.0384	-2.44759	-0.803311	-1.86275	-3.13279	-3.70969	-2.42036	-3.38196	-4.38193	-5.80551	14.2086	43.2193	2.99e-16	9.84e-16	3.01023	2.30717	0.810892	1.71134	0.10018	0.103293	0.94864	1.27375	1.52331	0.10017	0.103274	2.66694	0.106495	0.101254
1403	-0.162646	-0.607866	-0.257033	0.143344	0.0356654	-0.503097	-1.34022	-1.95172	-0.411294	-1.86139	-2.82124	-3.10494	-2.43025	-3.48958	-3.36098	-3.86022	16.2462	112.331	1.27e-22	4.62e-20	2.98521	2.25017	0.101372	1.4649	0.649665	0.103293	0.101026	1.20825	1.51748	0.10017	0.103274	2.64422	0.106495	0.101254
1404	-0.694276	0.11465	0.241992	-0.281606	-0.912229	-0.399187	-0.0232947	-1.52555	-0.945561	-0.898933	-1.89611	-2.66815	-1.19086	-1.99739	-2.81363	-3.40303	13.3099	22.0713	1.83e-12	2.33e-12	3.0051	2.28735	1.21527	1.65462	0.10018	0.103293	0.41524	0.896413	0.805395	0.328078	0.103274	2.65211	0.106495	0.101254
1405	0.141151	0.28252	0.356253	-0.377553	-0.24168	-0.18618	-0.0681102	-0.157435	0.0523982	0.484342	0.660295	0.276398	1.00876	1.59125	1.5919	0.878486	16.0428	10.8547	2.17e-08	2.31e-08	2.79835	2.03726	0.101372	0.331086	0.10018	0.103293	0.101026	0.101889	0.100977	0.10017	0.103274	2.55273	0.106495	0.101254
1406	-0.717895	-0.498345	-0.00598091	0.121616	-0.464865	-0.385671	-0.504372	-1.69577	-1.1148	-1.24138	-2.46875	-3.01891	-2.88985	-3.14512	-3.4634	-3.44455	14.5032	34.9454	5.76e-15	1.21e-14	2.98636	2.24084	0.962084	0.778794	0.10018	0.103293	0.101026	0.48808	1.59587	0.10017	0.103274	2.6402	0.106495	1.18674
1407	-0.68215	-0.62766	-0.22749	-0.025562	-0.41684	-0.503783	-0.903227	-2.24582	-0.893053	-1.71133	-2.92774	-4.16077	-2.92165	-3.43444	-4.89917	-5.78682	15.9103	61.7459	1.92e-18	2.06e-17	2.99074	2.26537	0.92972	0.100986	0.10018	0.103293	0.101026	1.35836	1.57239	0.10017	0.103274	2.64369	0.106495	0.936519
1408	-0.326809	-0.728212	-0.422754	-0.0519013	-0.234088	-0.657964	-1.34596	-2.23607	-0.55259	-1.93838	-3.0663	-3.72402	-2.53709	-3.36928	-4.59351	-4.9061	16.4929	123.44	3.1e-23	1.46e-20	2.98397	2.25056	0.125591	0.100986	0.49372	0.103293	0.101026	1.2948	1.48947	0.10017	0.103274	2.6415	0.106495	0.622265
1409	-0.362392	-0.703402	-0.234279	0.122556	-0.214713	-0.633905	-1.23026	-1.73154	-0.656321	-1.77437	-2.46201	-2.50495	-2.44839	-2.80658	-2.65083	-2.88689	16.6005	83.2731	1.08e-20	6.07e-19	2.98358	2.23959	0.101372	1.36393	0.10018	0.103293	0.101026	1.0608	1.47611	0.10017	0.103274	2.64426	0.106495	0.101254
1410	2.72217	3.01923	2.99284	-1.41596	1.7827	3.21132	4.42407	3.58643	3.15469	4.8105	5.50659	3.2925	5.52967	6.28075	6.23528	4.12757	13.5125	42.5418	3.73e-16	1.16e-15	3.08476	2.23069	1.64768	1.60569	0.732791	0.94635	0.909757	1.23097	1.18234	0.10017	1.89525	2.6791	0.106495	3.23909
1411	-0.707897	-0.204835	0.233118	0.20177	-0.203476	-0.195852	-0.292678	-1.91553	-0.845093	-1.25984	-2.23505	-3.60266	-2.66325	-3.14703	-4.11228	-5.64784	15.6143	45.1343	1.63e-16	6.2e-16	3.00994	2.27906	1.25203	1.46057	0.10018	0.103293	0.101026	1.36872	1.56329	0.10017	0.103274	2.65909	0.106495	0.920201
1412	0.260533	-0.0663668	-0.574919	-0.772879	-0.20723	-0.504441	-0.871086	-1.27854	0.154407	-0.629618	-1.4564	-1.78172	-0.0185004	-0.662563	-1.41288	-1.46576	14.2556	8.15682	5.59e-07	5.78e-07	2.93698	2.17093	0.101372	0.100986	0.10018	0.103293	0.101026	1.13173	0.100977	0.10017	0.323705	2.60806	0.106495	1.06065
1413	-0.712938	-0.539109	0.138505	0.142011	-0.336418	-0.438787	-0.684105	-2.23706	-0.909644	-1.71803	-2.77106	-4.28294	-3.01577	-3.58547	-4.75381	-6.49525	16.0209	69.1316	3.82e-19	5.87e-18	3.00263	2.26809	1.14881	1.00261	0.526954	0.103293	0.101026	1.39186	1.59179	0.10017	0.103274	2.6557	0.106495	0.101254
1414	-0.32943	-0.393703	0.144195	0.0859777	-0.501221	-0.549478	-0.440834	-0.750683	-0.61581	-0.792934	-0.675207	-0.838294	-0.710673	-0.0818406	0.0256371	-0.403098	15.0655	2.80047	0.00734253	0.00735898	2.88968	2.11277	0.101372	0.100986	0.10018	0.103293	0.101026	0.101889	1.00826	0.10017	0.103274	2.58652	0.106495	0.101254
1415	-0.658773	-0.374637	0.359617	0.309546	-0.337503	-0.286506	-0.314069	-1.92603	-1.10718	-1.3249	-2.41947	-3.18752	-2.97066	-3.22137	-3.68085	-3.81121	14.7947	62.4443	7.39e-19	9.57e-18	2.99747	2.25499	1.11207	1.37729	0.634176	0.103293	0.101026	0.513828	1.60874	0.10017	0.103274	2.63914	0.106495	0.855225
1416	-0.680659	-0.489114	0.207902	0.0170375	-0.499384	-0.397621	-0.397809	-1.9027	-1.03287	-1.51781	-2.51998	-3.44917	-2.72181	-2.99994	-3.93037	-4.49094	15.6971	59.2469	3.46e-18	3.21e-17	2.97942	2.23115	1.13412	0.100986	0.135593	0.103293	0.101026	0.991915	1.47249	0.10017	0.103274	2.63079	0.106495	0.715101
1418	0.0726777	0.510119	0.39988	-0.280164	-0.307401	-0.00966942	0.0778371	-0.217541	-0.0476078	0.435536	0.337533	0.0518272	0.737884	1.18494	1.13871	0.388161	15.6819	5.86019	1.73e-05	1.76e-05	2.85018	2.1331	0.101372	1.27944	0.10018	0.103293	0.101026	0.101889	0.100977	0.10017	0.103274	2.61021	0.106495	0.101254
1419	-0.635505	-0.646294	-0.160256	0.214864	-0.234957	-0.484727	-0.992636	-2.35283	-0.898153	-1.84527	-3.13234	-4.02819	-3.11549	-3.86376	-4.76988	-5.74248	16.4382	97.815	2.56e-21	2.64e-19	3.002	2.27899	0.794211	1.50437	0.10018	0.103293	0.101026	1.27283	1.64342	0.10017	0.103274	2.65878	0.106495	0.704991
1420	-0.841885	-0.455083	-0.211147	-0.190668	-0.549198	-0.457837	-0.680626	-2.084	-0.941183	-1.55019	-2.90901	-4.03825	-2.91955	-3.38071	-4.70388	-6.27029	14.3649	66.3086	3.07e-19	5.03e-18	2.9934	2.27378	1.09827	0.100986	0.608258	0.103293	0.515184	1.30035	1.46643	0.10017	0.103274	2.64728	0.623603	0.101254
1421	-0.262851	0.0572357	0.533948	0.139404	-0.2202	0.0597432	0.585404	-0.492047	-0.460549	-0.483587	-1.00776	-2.34074	-1.70891	-1.89794	-2.3593	-3.59147	13.3585	13.3175	1.86e-09	2.03e-09	2.99299	2.18075	1.35144	0.100986	0.10018	0.103293	0.101026	1.27471	1.36822	0.357103	0.103274	2.63936	0.106495	1.27093
1422	-0.141656	-0.470787	-0.102437	0.104958	-0.136332	-0.377466	-0.780546	-1.39775	-0.412898	-1.22767	-1.92694	-2.25835	-1.70668	-1.90637	-1.85852	-1.98036	15.1912	35.0999	2.95e-15	6.97e-15	2.95873	2.20552	0.101372	0.100986	0.537567	0.103293	0.101026	0.564627	1.36842	0.10017	0.103274	2.6202	0.106495	1.02714
1423	-0.657504	-0.0520421	0.635713	0.525105	-0.347247	-0.134391	0.151612	-1.35842	-1.27748	-1.10107	-2.02986	-2.73791	-2.99719	-3.35317	-3.67248	-3.92724	13.016	37.113	1.34e-15	3.43e-15	3.02458	2.28945	1.27655	1.77024	0.10018	0.103293	0.101026	0.448342	1.54438	0.485434	0.103274	2.67427	0.106495	0.959607
1424	-0.607749	-0.30745	0.397681	0.384551	-0.355014	-0.324094	-0.307273	-1.62877	-1.09647	-1.33257	-2.1667	-2.46861	-2.81473	-2.64821	-2.67952	-2.93957	14.8949	54.989	4.71e-18	3.97e-17	2.99466	2.25165	1.01847	1.71068	0.113084	0.103293	0.101026	0.486375	1.55547	0.10017	0.103274	2.6448	0.106495	0.479814
1425	-0.828217	-0.773558	-0.0968762	0.0346819	-0.660725	-0.681623	-0.862813	-2.46631	-1.28015	-2.09961	-3.21088	-4.72415	-3.4796	-3.78193	-5.68522	-6.40305	14.4709	65.859	5.37e-19	7.54e-18	2.99672	2.25741	1.11465	0.100986	0.10018	0.103293	0.101026	1.17343	1.63402	0.10017	0.760572	2.65007	0.106495	0.101254
1426	0.203782	0.0514892	-0.0784702	-0.541283	0.0274974	-0.587581	-0.626489	-0.988465	0.144613	-0.516001	-1.46042	-1.20394	-0.0893843	-0.524678	-0.492739	-1.13195	13.7556	5.63041	2.22e-05	2.27e-05	2.92103	2.12889	0.101372	1.68577	0.10018	0.103293	0.101026	1.16794	0.138709	0.10017	0.103274	2.60237	0.106495	0.101254
1427	0.0139694	0.0314161	0.0275002	-0.278319	-0.251048	-0.386677	-0.492673	-0.839618	-0.107813	-0.408268	-0.606512	-0.912151	-0.0662813	0.0981804	0.0995769	-0.629946	16.4097	3.84769	0.000732106	0.000736527	2.8872	2.1477	0.101372	1.33224	0.10018	0.103293	0.101026	0.668227	0.148378	0.10017	0.103274	2.60598	0.106495	0.101254
1428	-0.31006	-0.6525	-0.889316	-0.155918	-0.149074	-0.484009	-1.46544	-2.09879	-0.409633	-1.90905	-3.11055	-3.65386	-2.58655	-4.03572	-5.00131	-6.03933	14.0297	54.3689	5.56e-18	4.47e-17	2.9893	2.26571	0.101372	0.100986	0.669897	0.103293	0.622688	1.17954	1.52789	0.10017	0.103274	2.65488	0.57437	1.0118
1429	0.483576	0.600585	0.546475	-0.0755492	0.267503	0.244473	0.0367502	0.0961179	0.263705	0.50601	0.475111	0.161586	0.939958	1.2672	1.39437	0.641533	13.9374	4.36545	0.000246686	0.000250261	2.85794	2.07545	0.101372	1.59004	0.10018	0.103293	0.101026	0.101889	0.100977	0.245279	0.103274	2.58618	0.106495	0.101254
1430	-0.24502	-0.71647	-0.57847	0.0135452	-0.0276924	-0.433059	-1.55629	-2.31654	-0.284454	-1.90442	-3.09296	-3.80472	-2.51637	-3.52233	-5.23819	-5.58977	14.9068	71.5255	1.4e-19	3.13e-18	2.99029	2.27606	0.101372	0.100986	0.909453	0.103293	0.117932	1.33469	1.54287	0.10017	0.103274	2.64932	0.106495	0.97908
1432	0.698137	2.86872	2.73592	-0.0897544	0.0566582	2.65937	4.81137	6.32369	0.459004	4.78976	6.63242	6.27862	0.634022	3.52157	4.90333	5.48649	14.6236	61.392	2.09e-18	2.13e-17	3.12492	2.2494	1.69862	1.70345	0.804801	0.103293	0.101026	1.27549	0.73514	0.10017	0.103274	2.62901	0.106495	3.24538
1433	3.62539	5.423	4.35183	2.06159	2.33612	5.28327	6.15341	7.8465	3.43325	6.71796	7.79257	9.01181	4.28915	6.05154	7.30435	9.03327	12.7678	32.6732	1.45e-14	2.7e-14	3.14079	2.14873	0.101372	2.06593	0.694333	0.103293	0.101026	1.1545	0.42255	0.10017	0.103274	2.52338	0.106495	3.24711
1434	1.34506	2.92689	2.6624	-1.48281	0.940535	2.78833	4.53559	6.43906	0.946867	4.7152	6.72813	7.86522	3.17163	4.5549	6.97486	8.05665	13.9258	75.8839	1e-19	2.5e-18	3.16649	2.18825	1.56714	2.21771	1.09237	0.103293	0.101026	0.887378	1.24668	0.10017	1.0041	2.53005	0.106495	3.37296
1436	1.90914	3.48355	1.85614	-0.615557	0.531632	3.757	3.97575	5.63689	1.99709	5.00619	4.95536	6.79142	2.13971	2.75889	4.48918	6.79477	13.7813	38.586	1.46e-15	3.69e-15	3.14692	2.15511	0.101372	1.98363	0.856158	0.103293	0.101026	1.23778	1.51897	0.10017	0.103274	2.56332	0.106495	3.32562
1437	-0.0271192	-0.194902	-0.115762	-0.463773	-0.29233	-0.605406	-0.72826	-1.20759	-0.204098	-0.757593	-1.07374	-1.37454	-0.324435	-0.280153	-0.41997	-1.08105	16.2061	5.87771	1.68e-05	1.71e-05	2.90644	2.13832	0.101372	1.04925	0.10018	0.103293	0.101026	0.983891	0.364621	0.10017	0.103274	2.60172	0.106495	0.101254
1438	0.179208	2.06038	2.62121	-2.54068	-0.206622	2.60472	4.64765	5.96341	-0.0239621	4.1277	5.90858	5.39972	1.23252	3.83094	4.43427	4.4527	12.4747	37.1926	2.43e-15	5.81e-15	3.0782	2.21332	1.68882	0.100986	0.10018	0.103293	0.101026	0.855635	0.100977	0.10017	0.103274	2.57642	0.106495	3.03483
1439	0.251069	2.54717	2.34716	-0.229437	-0.136311	2.67143	4.58883	6.11294	0.674649	4.18513	5.98796	6.73877	0.539702	2.74835	4.55136	6.09021	14.0684	64.5859	1.01e-18	1.26e-17	3.14209	2.22059	1.5969	1.81022	0.15238	0.103293	0.101026	0.706919	1.37833	0.10017	0.103274	2.5728	0.106495	3.25702
1443	-0.524059	1.89547	1.27359	-0.932171	-1.51965	2.24188	3.52362	4.93412	0.5037	3.48077	4.81695	6.19658	-0.265636	1.80627	3.73497	5.84633	12.9231	54.4157	1.16e-17	8.25e-17	3.13678	2.13623	1.43305	1.83209	0.102917	0.103293	0.101026	0.404291	1.56262	0.10017	0.103274	2.4841	0.106495	3.26417
1444	0.563245	2.70328	2.54147	-0.564789	-2.99e-12	2.26166	4.43601	6.81314	-0.564789	4.5678	6.2191	7.26477	0.701659	2.36432	5.34828	6.90507	13.2556	68.5524	4.31e-19	6.28e-18	3.15665	2.20749	1.68894	1.30123	0.935581	0.103293	0.279029	1.11363	1.60403	0.693632	0.103274	2.57153	0.106495	3.40401
1445	1.47703	2.59822	2.02593	-1.06278	0.117193	2.52399	3.9646	5.44577	1.19965	4.52644	5.33905	5.67423	2.90261	4.19183	5.12615	5.57049	14.0998	44.1264	2.24e-16	7.84e-16	3.13529	2.24408	1.67943	0.780582	1.11901	0.103293	0.101026	1.18356	1.43376	0.10017	1.12183	2.62764	0.106495	3.34446
1446	2.29561	2.52152	1.5977	-1.3815	1.7337	2.58577	3.46316	2.53442	2.57348	3.59077	3.94013	1.65906	3.13829	3.61109	3.8257	1.02664	12.3381	13.2411	1.99e-09	2.17e-09	3.09283	2.31678	1.68622	1.91942	0.905564	0.241264	0.101026	1.39388	1.50649	0.510307	1.88223	2.73161	0.106495	3.08863
1447	-0.369725	-0.683884	0.0297607	0.310359	-0.270187	-0.554214	-0.874606	-1.17036	-0.752856	-1.50081	-1.63463	-1.59875	-2.24078	-1.85922	-1.27303	-1.45324	15.7205	17.6257	5.47e-11	6.27e-11	2.95029	2.19826	0.101372	1.43956	0.10018	0.103293	0.101026	0.418369	1.45997	0.10017	0.103274	2.62112	0.106495	0.101254
1449	0.0613465	0.219562	0.296394	-0.416594	-0.342592	-0.277205	-0.1159	-0.348518	-0.103864	0.304949	0.371157	0.0337038	0.776222	1.32107	1.24328	0.525001	15.9799	7.64794	1.12e-06	1.16e-06	2.81394	2.06356	0.101372	0.100986	0.10018	0.103293	0.101026	0.101889	0.100977	0.10017	0.103274	2.56923	0.106495	0.101254
1451	0.214382	0.519279	0.483022	-0.197363	-0.0887486	0.0201432	0.189846	0.136837	0.326866	0.678754	0.873024	0.522479	1.18678	1.72989	1.84586	1.16708	16.0624	13.0393	2.4e-09	2.62e-09	2.80349	2.03221	0.101372	1.2	0.10018	0.103293	0.101026	0.101889	0.100977	0.10017	0.103274	2.55278	0.106495	0.114685
1453	1.99968	2.19438	-0.0762647	-1.62427	1.43884	2.37282	1.96172	3.40603	2.40562	3.69628	2.79612	3.96198	3.43056	3.1027	3.39699	4.44018	12.6963	16.1225	1.71e-10	1.92e-10	3.0916	2.19019	0.101372	1.21649	1.16126	0.103293	0.101026	1.29568	1.53848	0.10017	1.16665	2.57265	0.106495	3.24578
1454	0.920329	4.23872	4.31074	1.72297	1.22069	3.87126	5.88167	8.26409	0.525904	5.43275	8.11954	9.51236	2.82986	4.49344	7.571	9.31154	13.7622	94.7728	4.04e-21	3.41e-19	3.18076	2.2016	1.67152	2.2785	0.978012	0.103293	0.101026	0.681378	1.50756	0.10017	0.694489	2.56455	0.106495	3.38332
1455	0.91854	3.30176	4.4433	2.0392	0.519212	3.48822	4.99863	7.96529	1.68676	5.11468	8.11628	9.68554	1.46841	3.35714	7.54489	9.56547	13.8457	162.676	4.98e-25	1.86e-21	3.1887	2.19452	1.68964	2.50749	1.06249	0.103293	0.101026	1.25206	1.53818	0.10017	0.103274	2.49873	0.106495	3.4008
1456	1.24727	2.86307	0.335417	-0.788673	0.944077	2.95937	2.93117	3.96395	2.01404	3.85993	2.98858	4.35657	1.40319	1.91574	2.50953	4.36213	12.813	18.4741	2.98e-11	3.44e-11	3.10532	2.22989	0.101372	1.68959	1.05521	0.103293	0.59953	1.31236	1.56809	0.10017	0.103274	2.61672	0.106495	3.21973
1458	-0.615593	2.10927	1.80617	-2.44329	-0.602225	1.93801	4.2711	5.81654	0.504852	3.96361	5.64681	5.88445	1.19026	3.17074	4.68561	5.445	13.2818	59.3261	3.4e-18	3.15e-17	3.12401	2.2253	1.66775	0.100986	0.829322	0.103293	0.101026	1.27817	0.923457	0.10017	0.103274	2.55553	0.106495	3.25356
1459	0.735997	2.91518	1.9667	-0.470304	0.249975	2.98203	4.49966	6.1185	1.15334	4.65608	5.6353	6.25578	1.29382	2.80825	4.42736	5.69028	13.8235	48.6894	5.6e-17	2.69e-16	3.12026	2.20363	1.44444	0.775634	0.750588	0.103293	0.101026	1.01736	1.35379	0.758513	0.103274	2.58841	0.106495	3.2872
1460	2.83978	2.5889	1.14479	-1.84099	1.72454	2.64016	2.72962	2.88088	2.81279	4.15163	3.32906	2.74938	5.23216	4.80121	3.67452	2.85587	13.0856	25.547	4.13e-13	5.83e-13	3.0585	2.23298	0.640274	1.47459	0.10018	0.987319	0.283927	1.14773	1.41037	0.10017	1.76927	2.65091	0.106495	3.16983
1462	1.12718	2.62265	2.48244	-0.48955	-0.647215	2.64536	4.33422	5.54443	0.672782	4.4567	5.76847	5.97062	2.8119	4.7578	5.72858	5.87409	13.8365	35.4263	4.77e-15	1.02e-14	3.12247	2.19481	1.76552	0.100986	0.821985	0.103293	0.101026	1.1741	1.40021	0.10017	1.05431	2.57207	0.106495	3.31499
1469	-0.159846	-0.287755	0.0714536	0.0625111	-0.26065	-0.41111	-0.553521	-0.771389	-0.349447	-0.583352	-0.683694	-0.772088	-0.327543	0.0541923	0.0407878	-0.31624	16.38	3.07482	0.00391629	0.00392835	2.87645	2.11786	0.101372	0.476077	0.10018	0.103293	0.101026	0.101889	0.923302	0.10017	0.103274	2.58626	0.106495	0.656591
1470	3.15935	5.7387	7.25152	3.69825	3.15935	5.81716	7.7695	10.8495	3.173	7.84464	11.1195	12.7573	3.15935	6.6065	10.785	12.7921	13.7556	143.828	3.15e-23	1.46e-20	3.183	2.19219	1.74421	2.43601	1.13327	0.103293	0.101026	1.13168	1.35077	0.10017	0.103274	2.43255	0.106495	3.4008
1471	0.540122	2.02219	2.32139	-0.851531	0.533894	2.33189	2.65568	6.09498	0.00636224	3.44664	5.33496	8.48786	0.540122	0.92415	5.43129	8.77508	12.58	71.254	2.47e-19	4.39e-18	3.18735	2.07592	1.07045	2.28495	1.2703	0.520314	0.101026	1.15727	1.68994	0.10017	0.103274	2.3971	0.106495	3.46103
1473	1.0825	3.17507	2.1897	-0.423502	0.847404	2.74218	4.62299	6.51691	0.9616	4.84673	6.17843	7.3477	1.51451	3.36115	5.49727	7.27257	14.3161	69.2837	3.7e-19	5.77e-18	3.14602	2.16635	1.43101	1.27742	1.11719	0.103293	0.101026	1.16722	1.33625	0.10017	0.103274	2.51955	0.106495	3.36532
1474	0.0497069	0.164721	0.3523	-0.206008	-0.30433	-0.243934	-0.10545	-0.191982	-0.0919858	0.311483	0.480313	0.15881	0.753048	1.31556	1.37306	0.701458	16.2249	8.78929	2.45e-07	2.56e-07	2.80645	2.05812	0.101372	0.539572	0.10018	0.103293	0.101026	0.101889	0.100977	0.10017	0.103274	2.56013	0.106495	0.101254
1475	-0.337387	1.14923	2.34806	0.339469	-1.7447	1.98709	4.21912	6.34089	-0.90397	3.73742	6.14561	7.67798	-0.38039	2.25223	5.30561	7.28052	12.7262	76.1199	9.57e-20	2.43e-18	3.16665	2.15992	1.6592	2.20186	0.235822	0.103293	0.101026	0.463683	1.59991	0.10017	0.103274	2.48507	0.106495	3.33095
1476	-0.0390334	2.66003	1.82329	-0.864221	-0.290593	2.61427	4.11922	6.18213	0.0483262	4.47498	5.55819	6.85357	0.792113	2.04157	4.71683	6.45159	14.3229	55.2069	9.46e-18	6.9e-17	3.1568	2.23054	1.55637	1.41145	0.980395	0.103293	0.101026	1.28541	1.62706	0.10017	0.103274	2.5413	0.106495	3.39452
1477	-0.339505	2.26972	1.81059	-2.79354	-0.348398	2.48617	4.35867	5.71725	0.383215	4.31952	5.72662	6.03883	1.48324	3.23915	4.88326	5.64405	13.7035	51.6846	2.41e-17	1.4e-16	3.10405	2.1488	1.53227	0.126116	0.285369	0.103293	0.101026	1.25671	1.26274	0.10017	0.103274	2.53909	0.106495	3.26491
1479	0.205436	0.558742	0.516869	-0.150282	-0.101637	0.0129738	0.195599	0.0279691	0.214986	0.574091	0.750142	0.389852	0.955465	1.47335	1.66224	0.931925	15.8586	8.82822	2.33e-07	2.43e-07	2.81951	2.0755	0.101372	1.37491	0.10018	0.103293	0.101026	0.101889	0.100977	0.10017	0.103274	2.57271	0.106495	0.101254
1480	2.17701	2.81353	2.23824	-0.181411	0.602313	3.14671	4.68717	5.53215	1.54554	4.90013	5.64803	5.4824	3.70041	5.2463	5.11626	4.75088	12.7245	31.6153	2.29e-14	4.01e-14	3.0969	2.21448	1.58072	0.406327	0.10018	0.103293	0.101026	0.457844	1.26101	0.10017	1.20484	2.63612	0.208545	3.19517
1481	0.952165	2.68791	3.65847	0.561677	-0.00269369	2.91456	4.88266	7.09147	1.12345	4.65021	7.18556	8.23419	1.26083	3.60513	6.48955	7.89543	13.5128	71.8215	2.21e-19	4.14e-18	3.16914	2.15573	1.63113	2.30375	0.146162	0.103293	0.101026	0.946785	1.57709	0.343419	0.481309	2.55229	0.106495	3.35037
1482	-0.544985	2.70529	3.50409	0.373251	0.373251	3.35532	5.26949	7.65937	0.675745	5.42231	6.99199	7.42825	0.691929	2.98283	5.42639	6.9774	12.8001	51.767	2.35e-17	1.4e-16	3.16082	2.29019	1.85656	1.10093	1.25268	0.103293	0.101026	1.36781	1.62236	0.10017	0.31915	2.64213	0.106495	3.39973
1483	0.919481	3.11182	0.278295	-1.82775	-0.0716042	2.91836	3.49195	5.38306	1.70488	4.65343	4.11705	6.08923	1.56686	2.5668	3.5544	5.95521	13.4218	29.7095	5.35e-14	8.65e-14	3.13833	2.20966	0.101372	1.04038	1.0928	0.103293	0.101026	1.11724	1.52878	0.10017	0.103274	2.55128	0.106495	3.34554
1485	-1.14e-10	4.08045	6.88865	2.31732	2.31732	4.82989	6.92754	9.86641	3.16094	6.84144	10.8121	11.481	3.16094	6.45177	9.97147	11.402	12.7015	71.1134	2.68e-18	2.61e-17	3.17611	2.17513	1.70945	2.54229	0.199897	0.351941	0.101026	1.12418	1.01552	0.10017	0.103274	2.49129	0.106495	3.32622
1486	1.34604	2.77474	1.6748	-1.35251	0.968911	2.61612	3.42433	5.28717	1.65005	4.35745	4.71935	7.64705	1.34604	2.60581	5.29658	8.07039	12.4438	54.1252	1.25e-17	8.62e-17	3.17509	2.10495	0.101372	2.52314	0.830786	0.103293	0.101026	0.397632	1.5292	0.10017	0.287876	2.43103	0.106495	3.32568
1487	-0.146125	2.50983	2.44679	-1.44398	-0.251985	2.20853	4.18067	5.55193	0.628448	4.33696	5.62437	5.19736	1.34906	3.8245	4.44353	4.34312	13.5098	30.9344	3.08e-14	5.22e-14	3.12459	2.26571	1.80781	1.60569	0.107106	0.864256	0.101026	1.38411	1.40409	0.10017	0.689154	2.6466	0.106495	3.29943
1490	-0.442371	-0.00512906	0.291136	0.280822	-0.194653	-0.151222	-0.350344	-1.94379	-0.77714	-1.30853	-2.50894	-3.08659	-2.16365	-2.86605	-3.56055	-4.42751	13.1452	25.1263	5.16e-13	7.13e-13	2.99615	2.25354	1.03029	1.36962	0.613642	0.103293	0.982447	0.455308	1.48948	0.10017	0.103274	2.63946	0.106495	0.580926
1491	1.15297	3.15815	3.28361	-0.959175	0.837402	2.78149	5.3038	6.55953	1.2151	5.2506	6.72132	5.75091	1.3592	4.30587	4.59417	4.36432	12.8663	43.5771	2.66e-16	8.87e-16	3.10297	2.27078	1.69205	1.24008	0.10018	0.55993	0.101026	1.36121	0.130181	0.10017	0.103274	2.65211	0.106495	3.18907
1492	-0.041904	1.4752	1.76292	-1.77601	-0.803729	1.77949	3.88205	5.27914	-0.321175	3.44986	5.11872	4.93925	-0.120404	2.813	3.60913	4.04231	13.3481	45.9794	1.25e-16	5.05e-16	3.09952	2.21952	1.57064	0.647971	0.432294	0.103293	0.101026	0.771556	0.100977	0.10017	0.103274	2.59661	0.106495	3.10453
1493	-0.428079	-0.883598	-0.413648	0.222637	-0.052712	-0.66498	-1.63688	-2.08894	-0.689396	-2.46292	-3.27596	-3.36257	-2.85374	-4.43371	-4.37581	-4.8079	14.4191	84.3002	8.97e-21	5.77e-19	2.9986	2.27431	0.101372	1.78653	0.10018	0.103293	0.101026	1.27258	1.64705	0.10017	0.103274	2.65684	0.106495	0.101254
1494	0.530325	2.79165	0.457353	-1.63437	-0.00748668	2.65976	3.07935	4.58482	1.1408	4.20062	3.30772	4.53822	1.07259	2.05773	2.13291	4.03838	14.0225	25.0622	5.34e-13	7.34e-13	3.10766	2.25727	0.101372	1.09104	0.70511	0.103293	0.101026	1.23633	1.46039	0.10017	0.103274	2.62442	0.106495	3.25625
1495	0.0547018	0.217921	0.233187	-0.473156	-0.322427	-0.298423	-0.209606	-0.341785	-0.0774665	0.334827	0.422148	0.0905818	0.840518	1.39016	1.34685	0.61291	15.9616	9.09682	1.66e-07	1.74e-07	2.806	2.06563	0.101372	0.12135	0.10018	0.103293	0.101026	0.101889	0.100977	0.10017	0.103274	2.56297	0.106495	0.101254
1496	0.376624	2.62574	2.70663	-0.142353	-0.313296	2.50187	4.66793	6.40277	0.314179	4.49022	6.60329	6.99268	0.674185	3.33689	5.26803	6.32036	14.7006	83.4313	2.55e-20	1.01e-18	3.14169	2.22545	1.68083	1.88575	0.313574	0.103293	0.101026	1.05595	1.18215	0.10017	0.103274	2.57419	0.106495	3.27614
1497	0.648389	2.67995	2.10455	-0.258892	-0.185301	2.56121	4.17973	5.30388	0.766915	4.26509	5.39716	5.16813	1.37623	3.24355	4.2606	4.19675	14.7567	44.6657	1.89e-16	6.92e-16	3.12217	2.27966	1.74737	1.70349	0.244984	0.103293	0.101026	1.28629	1.43518	0.10017	0.680501	2.6471	0.106495	3.23808
1498	2.46658	4.43609	2.1044	0.0293072	1.80007	4.04835	4.09686	6.40274	3.21458	6.09249	5.49532	6.49968	3.41136	4.13873	4.78971	6.02089	12.5253	31.3839	2.53e-14	4.37e-14	3.12309	2.21223	0.545327	1.54642	0.961227	0.703244	0.098995	1.35327	1.44716	0.1543	0.841665	2.63457	0.871695	3.33993
1500	0.91163	2.53694	3.68784	-0.978903	0.225317	3.01313	5.0352	6.55653	0.73144	4.79826	7.40881	7.72838	1.19685	3.96801	6.42818	7.26814	13.2501	68.2057	4.63e-19	6.68e-18	3.14594	2.20811	1.68479	2.28353	0.115681	0.103293	0.101026	1.18898	0.871103	0.10017	0.103274	2.52247	0.106495	3.20875
1501	0.917751	2.53498	2.98525	-0.696161	0.0181734	2.06258	4.74162	6.35281	-2.09885	4.17781	6.44005	6.56521	0.599011	3.44341	4.79933	5.83036	12.5925	44.5561	1.95e-16	7.06e-16	3.13051	2.21588	1.62394	1.7394	0.944035	0.103293	0.101026	0.401425	0.105792	0.10017	0.171044	2.60705	0.220259	3.20786
1503	-0.280769	-0.866162	-0.414712	0.0479452	-0.140465	-0.665625	-1.3745	-2.13945	-0.496594	-1.97317	-3.03548	-3.65936	-2.60371	-3.61443	-4.52386	-4.60857	16.0639	90.2112	3.87e-21	3.41e-19	2.97498	2.21343	0.101372	1.16145	0.10018	0.103293	0.101026	1.36669	1.53403	0.10017	0.103274	2.63478	0.106495	0.66419
1504	0.0674907	0.191264	0.24736	-0.420779	-0.351573	-0.309403	-0.203701	-0.314101	-0.102746	0.320161	0.387827	0.043656	0.816056	1.34537	1.26686	0.527513	16.0068	8.14658	5.67e-07	5.86e-07	2.81803	2.06886	0.101372	0.142783	0.10018	0.103293	0.101026	0.101889	0.100977	0.10017	0.103274	2.57482	0.106495	0.101254
1505	0.871417	3.29634	3.40742	0.805714	0.366654	2.9291	4.86938	6.88708	-7.35e-11	4.76584	7.12735	7.79049	1.04866	3.43493	6.26716	7.51827	14.3518	100.61	1.7e-21	2e-19	3.15237	2.21506	1.73755	1.9771	1.13821	0.103293	0.101026	1.1009	1.17603	0.10017	0.245982	2.53824	0.106495	3.30856
1506	0.485643	2.71327	2.76348	-0.0760165	-0.332365	2.79477	4.77763	6.40445	0.631818	4.72659	6.63408	6.81378	0.735803	3.53625	5.30995	6.05404	14.5125	79.153	5.45e-20	1.74e-18	3.13444	2.23442	1.7044	1.76182	0.17025	0.103293	0.101026	1.18448	1.1848	0.10017	0.103274	2.58025	0.106495	3.26631
1507	1.91552	3.81633	2.22247	-0.535766	-0.00893234	3.51121	4.09051	6.41116	2.21544	5.09231	5.45983	8.06624	1.9965	2.88765	5.56949	8.33399	12.8985	48.2584	6.35e-17	2.96e-16	3.18515	2.18776	0.101372	2.44249	1.21805	0.103293	0.101026	1.23655	1.51786	0.10017	0.103274	2.53302	0.106495	3.39427
1509	0.260342	2.77627	3.54398	1.46203	1.19154	2.79612	4.77491	7.15795	0.967923	4.3828	7.04203	8.56476	-0.0138656	2.56098	6.14084	8.424	13.9638	99.6032	1.97e-21	2.17e-19	3.17413	2.18132	1.68788	2.25634	1.14133	0.103293	0.101026	0.917645	1.52622	0.10017	0.103274	2.51392	0.106495	3.366
1510	2.32784	4.06546	3.87918	0.913866	0.917758	3.17138	5.94299	7.3079	1.48182	5.66763	7.4458	6.75029	2.45233	4.83845	5.81129	5.91606	12.2111	35.7334	4.23e-15	9.28e-15	3.09178	2.20695	1.72275	0.100986	0.512352	0.946189	0.101026	1.31137	0.897626	0.364604	0.103274	2.58685	0.106495	3.23775
1513	-1.39002	1.62614	2.09793	-1.91378	-2.75471	1.72134	4.38588	6.15795	-0.256839	3.94844	5.90035	6.99543	-0.218431	2.98685	5.06935	6.61618	13.2926	67.2137	5.71e-19	7.94e-18	3.14608	2.17113	1.66197	1.38679	0.299418	0.103293	0.101026	0.413024	1.37288	0.10017	0.103274	2.49091	0.106495	3.30981
1514	-0.497396	-0.900234	-0.345199	0.0249687	-0.275612	-0.713056	-1.34556	-2.3703	-0.750023	-2.13119	-3.30911	-3.93648	-3.01163	-3.83843	-4.87256	-5.16725	16.6253	120.421	1.25e-22	4.62e-20	2.9847	2.24382	0.317029	0.924817	0.10018	0.103293	0.101026	1.34522	1.58887	0.10017	0.103274	2.64421	0.106495	0.101254
1515	2.40544	3.06886	1.37321	-1.48564	1.6048	3.08023	3.36296	4.65029	2.48812	4.59279	4.30548	5.66141	3.8262	3.82867	4.71357	5.8589	13.669	29.0549	7.24e-14	1.14e-13	3.13672	2.21836	0.101372	2.06677	0.939555	0.103293	0.352466	1.21976	1.40839	0.10017	0.984296	2.61078	0.106495	3.27324
1516	0.795682	1.66248	1.5902	-0.541387	-0.0198667	1.71123	3.27201	3.39259	0.313297	2.58893	3.59969	2.42876	0.510107	1.59824	1.65017	0.763931	12.9226	23.9684	9.36e-13	1.24e-12	3.05512	2.23483	1.65001	0.890805	0.414679	0.103293	0.101026	1.28389	0.100977	0.10017	0.103274	2.63717	0.106495	2.62075
1518	-0.240375	2.76286	2.18472	-0.77537	-1.1747	2.7194	4.42393	6.54147	0.331089	4.76037	5.8984	6.63165	1.05606	2.02357	4.42318	5.98488	12.9982	47.8554	7.14e-17	3.23e-16	3.14718	2.26487	1.69853	0.190286	1.12195	0.103293	0.101026	1.38613	1.54919	0.10017	0.103274	2.61141	0.267812	3.39017
1519	0.974781	2.47018	1.00633	-2.10608	-0.141084	2.40483	3.38445	4.75004	1.14731	4.37113	4.37242	5.0179	2.4483	3.33621	3.77151	4.67563	14.6775	36.5089	3.14e-15	7.33e-15	3.10617	2.17936	1.11544	1.21264	0.382016	0.103293	0.101026	1.23456	1.45022	0.10017	0.78603	2.59832	0.106495	3.28758
1521	0.87917	1.36552	3.88135	1.78243	-2.31495	2.71443	5.10366	7.76741	-2.31495	4.19396	7.81793	9.28277	7.7e-14	3.51669	6.86446	8.8831	12.5416	95.4075	2.76e-20	1.05e-18	3.18251	2.17766	1.76124	2.51905	0.366202	0.103293	0.101026	0.59685	1.54503	0.10017	0.103274	2.49574	0.106495	3.33991
1523	0.0898754	-0.16614	-0.604364	-0.895732	-0.288428	-0.52981	-0.916718	-1.3791	-0.0751734	-0.643313	-1.3568	-1.66401	-0.0381715	-0.293924	-1.01157	-1.44873	14.6545	6.54478	5.73e-06	5.87e-06	2.90294	2.16258	0.101372	0.100986	0.10018	0.103293	0.101026	1.03795	0.100977	0.10017	0.103274	2.59675	0.106495	0.973984
1524	2.19372	4.84465	3.23273	0.912693	1.21017	4.72709	5.0295	7.3699	3.08172	6.24581	6.36216	8.51797	2.63922	3.63312	6.1037	8.72293	12.972	40.0979	8.53e-16	2.3e-15	3.16847	2.17543	0.101372	2.20054	1.20315	0.103293	0.101026	1.27988	1.4757	0.10017	0.103274	2.55889	0.106495	3.39095
1525	1.82858	3.42751	2.61999	-4.39284	0.675507	2.88952	3.81523	5.72592	2.23234	5.17482	5.6937	7.00907	3.69719	4.5504	6.47373	7.13026	13.0592	51.6236	6.81e-17	3.08e-16	3.14994	2.19639	1.39058	2.0986	0.854029	0.838172	0.101026	1.38367	1.59508	0.214083	1.06746	2.51574	0.106495	3.39009
1526	2.48129	2.54326	1.19741	-1.23657	1.19148	2.73872	3.54669	3.77247	2.62716	4.4652	4.24351	3.16291	4.51824	4.93861	3.34182	1.88838	14.1253	31.8201	2.09e-14	3.74e-14	3.03084	2.16895	1.13712	0.871933	0.10018	0.103293	0.101026	1.16047	0.803809	0.10017	1.44904	2.64289	0.348302	3.04552
1527	2.5875	2.08218	1.95637	-1.57245	1.04271	2.70032	3.94702	3.55781	2.42425	4.48403	4.72889	3.37991	4.75178	5.37133	4.65692	3.21152	13.6737	29.0682	7.2e-14	1.14e-13	3.08317	2.21704	1.42372	1.39853	0.10018	0.103293	0.101026	0.888449	1.09382	0.10017	1.79557	2.66625	0.106495	3.17955
1528	1.05907	3.08164	2.17344	-0.510213	0.332593	2.97228	4.10927	5.97749	1.07342	4.85658	5.69141	6.80939	2.23503	3.38737	5.28628	6.56693	14.8475	65.9311	7.53e-19	9.72e-18	3.14427	2.23029	1.48541	1.68081	0.971244	0.103293	0.101026	1.16365	1.52478	0.10017	0.692787	2.53538	0.106495	3.36054
1530	0.33052	0.395426	-0.17457	-0.453535	-0.00986794	-0.125223	-0.445409	-0.651221	0.341724	-0.0857815	-0.690891	-1.08292	0.29277	0.0498006	-0.295074	-0.637712	15.2213	4.8035	0.000111289	0.000113088	2.91724	2.17586	0.101372	1.35253	0.10018	0.103293	0.101026	0.863014	0.100977	0.10017	0.103274	2.6117	0.106495	1.11163
1531	-0.713678	-0.604831	-0.14643	0.0714164	-0.262583	-0.443914	-0.844637	-2.26734	-0.862327	-1.70876	-2.97804	-4.26804	-3.32708	-3.80419	-5.11435	-6.80781	15.595	82.3421	3.09e-20	1.14e-18	2.99872	2.27165	0.996817	1.09884	0.547071	0.103293	0.101026	1.29576	1.59891	0.10017	0.103274	2.65826	0.524329	0.101254
1532	-0.549726	2.21395	2.32034	-1.38663	-0.542121	3.34979	3.70572	5.95566	1.13073	3.83418	5.54783	8.03832	1.13073	1.6354	5.26493	8.02566	12.6627	51.694	2.4e-17	1.4e-16	3.19866	2.15935	0.709006	2.56755	0.487995	0.173361	0.101026	1.20188	1.66736	0.10017	0.103274	2.48058	0.106495	3.40398
1533	1.37175	3.78473	4.03546	1.76283	-0.0077299	4.07614	5.9852	8.29945	1.37175	5.36322	7.5163	8.88836	1.3644	3.26813	6.73884	8.66833	12.4801	72.6404	1.88e-19	3.77e-18	3.16105	2.19095	1.72284	0.100986	1.16836	0.103293	0.101026	1.2308	1.62644	0.507072	0.103274	2.526	0.106495	3.42955
1536	-0.432793	2.60242	2.1975	0.601269	0.358487	2.35494	4.09633	5.37184	1.14245	3.63536	4.87605	5.3241	0.228241	1.778	3.40623	4.56212	12.7256	27.6529	1.42e-13	2.14e-13	3.11337	2.27148	1.68311	1.55426	0.966614	0.103293	0.241106	0.380737	1.50797	0.10017	0.103274	2.61235	0.106495	3.14728
1537	0.287991	2.45169	1.92511	-0.0410678	0.114861	2.4444	3.86931	4.90727	0.420749	3.77259	4.78865	4.58789	0.454922	1.82735	3.24482	3.74946	14.837	37.2323	2.39e-15	5.75e-15	3.10559	2.24555	1.70236	1.366	0.802923	0.103293	0.101026	1.29046	1.50328	0.10017	0.256931	2.64237	0.106495	3.20074
1538	3.06995	2.31039	0.592502	-2.95772	1.70012	2.50924	2.83146	3.17472	3.22664	4.20338	3.56215	2.3466	5.26114	5.17785	3.09249	1.65355	13.5263	35.7336	4.23e-15	9.28e-15	3.03154	2.21047	0.101372	1.29732	0.329218	0.103293	0.101026	1.25324	0.100977	0.284137	1.70118	2.65515	0.277948	3.0739
1539	0.62769	2.58936	1.14376	-2.06037	-0.217954	2.50436	3.57029	4.85675	0.87483	4.18906	4.47759	4.72587	0.826922	2.24023	2.8465	3.99384	14.6878	40.1629	8.34e-16	2.25e-15	3.10161	2.22649	1.12728	1.49301	0.10018	0.103293	0.101026	1.26897	1.33339	0.10017	0.103274	2.62167	0.106495	3.23676
1540	2.33464	4.06102	7.07274	3.19489	2.31484	5.33144	7.75403	9.98828	-1.62e-10	6.82881	10.7448	11.4237	2.31484	6.85303	9.98723	10.9595	12.5963	75.5165	1.19e-18	1.42e-17	3.17496	2.22204	1.87273	2.42711	0.196999	0.103293	0.101026	1.15857	1.15816	0.10017	0.103274	2.50778	0.106495	3.32421
1541	-0.000328776	0.0962783	0.324248	-0.0118573	-0.274856	-0.225283	-0.172899	-0.353669	-0.187758	-0.00950825	0.093804	-0.125023	0.335237	0.849183	0.963457	0.331201	16.6335	4.77738	0.000116861	0.000118746	2.83989	2.09734	0.101372	1.10362	0.10018	0.103293	0.101026	0.101889	0.100977	0.10017	0.103274	2.58361	0.106495	0.101254
1542	-0.921947	2.71897	3.36315	1.28138	-1.7638	2.62253	5.3381	6.94615	-0.39729	4.60928	6.83284	7.26943	0.754072	3.1654	5.19278	6.49165	12.8071	62.3391	1.68e-18	1.85e-17	3.13929	2.21859	1.81939	1.80231	0.308251	0.503511	0.101026	0.406172	1.47192	0.10017	0.103274	2.58206	0.106495	3.26748
1543	-0.00907608	-0.392511	-0.182776	0.142349	-0.0413803	-0.330867	-0.845693	-1.45351	-0.245693	-1.15567	-2.08927	-2.40742	-1.64379	-2.03826	-2.05953	-2.22596	16.007	36.6111	1.63e-15	4.05e-15	2.96353	2.2079	0.101372	0.953389	0.10018	0.103293	0.101026	0.878705	1.3666	0.10017	0.103274	2.63093	0.106495	1.08463
1545	0.369612	3.08427	2.18773	-0.147238	0.475421	2.68531	4.93613	6.24505	0.252195	4.84569	6.01938	6.24088	1.858	3.50661	5.17761	5.97394	13.4965	53.4732	1.49e-17	9.73e-17	3.12782	2.23392	1.66812	1.04001	1.00724	0.103293	0.781941	1.33619	1.38055	0.10017	0.103274	2.61965	0.106495	3.33492
1546	0.0985633	2.53976	1.90906	-0.600551	-0.284668	2.38554	4.22362	5.9532	-0.291235	4.30691	5.60897	5.89127	0.392924	2.5577	4.17928	5.27362	14.3713	58.0468	4.63e-18	3.92e-17	3.13087	2.25792	1.6047	1.2452	1.02689	0.103293	0.101026	1.21445	1.11892	0.423714	0.103274	2.61881	0.106495	3.29935
1547	-0.52436	0.314985	0.198976	-0.606393	-0.818612	-0.0207316	0.173864	-1.25105	-0.209731	-0.578888	-1.72024	-2.89835	-0.812751	-1.7761	-2.82567	-6.13778	12.2192	22.2951	1.59e-12	2.05e-12	3.01183	2.28159	1.37456	1.21072	0.10018	0.103293	0.101026	1.44574	0.511351	0.107113	0.851352	2.66206	0.106495	0.269083
1549	0.848778	2.41572	1.42538	-0.72384	0.416723	2.17906	3.58993	4.6646	0.553405	3.61997	4.25356	4.31374	0.678931	1.68955	2.53243	3.61105	14.3364	39.2654	1.14e-15	2.98e-15	3.0914	2.26238	1.4368	1.06725	0.98821	0.103293	0.101026	1.13413	1.14868	0.10017	0.103274	2.6229	0.106495	3.12555
1550	-0.749099	2.41127	2.43848	-0.442618	-0.234448	2.83783	4.3273	5.62716	0.517299	4.06029	5.18641	5.3066	0.505125	2.09003	3.383	4.3669	13.1324	24.8906	5.86e-13	8.01e-13	3.11157	2.24279	1.68134	0.100986	0.10018	0.103293	0.101026	1.0891	1.60871	0.10017	0.103274	2.62764	0.106495	3.21711
1551	0.327902	2.56567	2.08739	-0.104928	-0.179557	2.27449	4.48014	6.0672	0.0443808	4.41989	5.69252	6.06101	0.891979	2.58351	4.44864	5.61054	14.1446	66.0284	7.37e-19	9.57e-18	3.12918	2.24296	1.69044	0.774888	1.12536	0.103293	0.101026	1.3171	1.34651	0.10017	0.103274	2.61481	0.106495	3.32623
1553	-0.903791	-0.479988	0.409279	0.0826806	-0.51166	-0.398961	-0.339173	-1.9932	-1.18372	-1.68272	-2.49317	-4.07342	-3.17415	-3.33532	-4.37365	-6.0013	15.186	55.1153	9.68e-18	7.06e-17	3.00557	2.27998	1.34344	0.595484	0.725323	0.103293	0.101026	1.22082	1.58063	0.10017	0.103274	2.65456	0.106495	0.101254
1554	0.159704	0.440076	0.385341	-0.249379	-0.171574	-0.0604357	0.0215442	-0.114737	0.102807	0.446018	0.553649	0.269325	0.902186	1.40772	1.46575	0.729731	16.3815	9.46893	1.06e-07	1.12e-07	2.82133	2.08218	0.101372	1.08793	0.10018	0.103293	0.101026	0.101889	0.100977	0.10017	0.103274	2.57958	0.106495	0.101254
1555	-0.304715	2.6902	2.39183	-1.14262	-0.439318	2.69403	4.51401	6.13117	0.194477	4.54589	5.90341	5.99818	0.425821	2.62214	4.31799	4.94462	14.3678	44.9371	1.73e-16	6.56e-16	3.13136	2.27066	1.7322	1.44895	0.59076	0.103293	0.101026	1.37876	1.46891	0.10017	0.103274	2.62954	0.168462	3.30633
1556	1.83858	4.04728	1.52596	-0.335308	1.06277	3.89274	3.82752	5.93191	2.73378	5.3237	5.03709	6.77521	2.70853	3.34382	4.96648	6.86278	12.709	22.3162	2.51e-12	3.15e-12	3.1478	2.21379	0.101372	1.8618	1.11615	0.103293	0.590531	1.38571	1.55914	0.10017	0.103274	2.57158	0.106495	3.35783
1558	-0.182016	-0.654756	-0.375421	0.181484	0.0526659	-0.361313	-1.26371	-2.15002	-0.283259	-1.69929	-2.95992	-3.65092	-2.53969	-3.46149	-4.18695	-4.2549	16.0631	93.0446	2.08e-21	2.24e-19	2.98458	2.25444	0.101372	1.1007	0.674404	0.103293	0.101026	1.21865	1.5644	0.10017	0.103274	2.63951	0.106495	1.03852
1561	0.0794348	0.225073	0.258275	-0.428695	-0.330282	-0.220706	-0.150494	-0.268975	-0.0860627	0.332659	0.421198	0.0848233	0.813497	1.32112	1.30661	0.571527	16.3114	9.06091	1.74e-07	1.82e-07	2.81901	2.07365	0.101372	0.581138	0.10018	0.103293	0.101026	0.101889	0.100977	0.10017	0.103274	2.57747	0.106495	0.101254
1565	-0.752021	-0.901358	-0.17281	0.0743401	-0.511648	-0.721605	-1.11611	-2.34772	-1.13159	-2.09223	-3.1089	-3.70191	-3.421	-3.68671	-4.51206	-4.7066	16.5731	135.953	7.33e-24	6.71e-21	2.99007	2.25605	0.7414	0.847879	0.10018	0.103293	0.101026	1.18634	1.62923	0.10017	0.103274	2.64739	0.106495	0.101254
[truncated: 269 more rows]

## Sheet: C) Figure 4 b-c underlying data
Supplementary File 5
Mean and SD of composite signalling protein measurements in Figure 4b and 4c
	N4			T4			G4			NP68
[truncated: 49 more rows]
