# Supplementary figures and images for: Stimulation strength controls the rate of initiation but not the molecular organisation of TCR-induced signalling
Source: eLife journal article supplement (doi:10.7554/elife.53948), 2020-05-15

Figure 5 - figure supplement 1

A

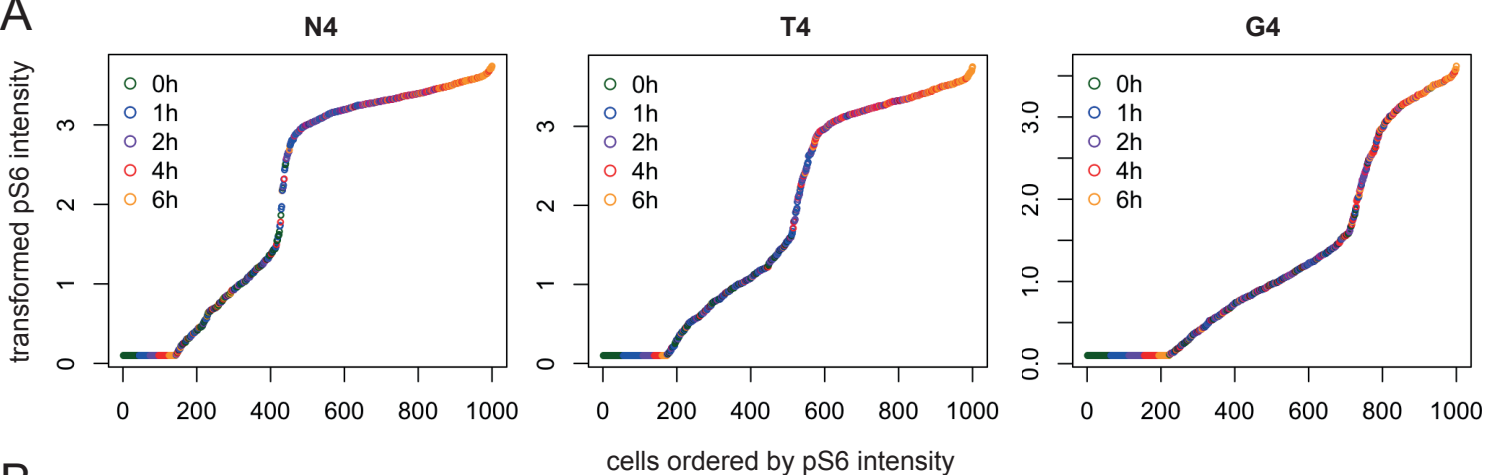

B

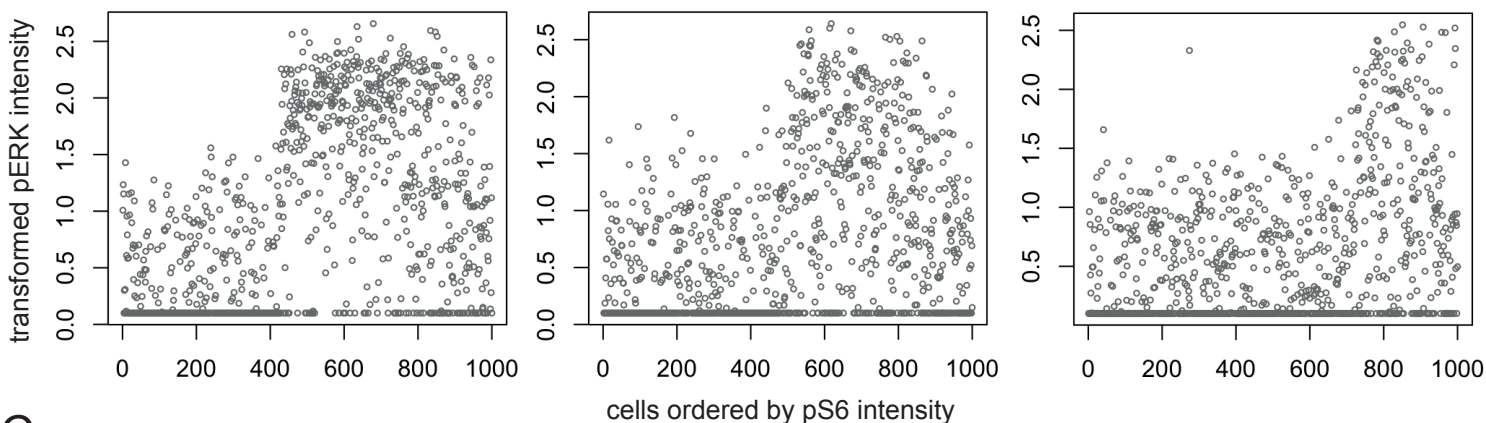

C

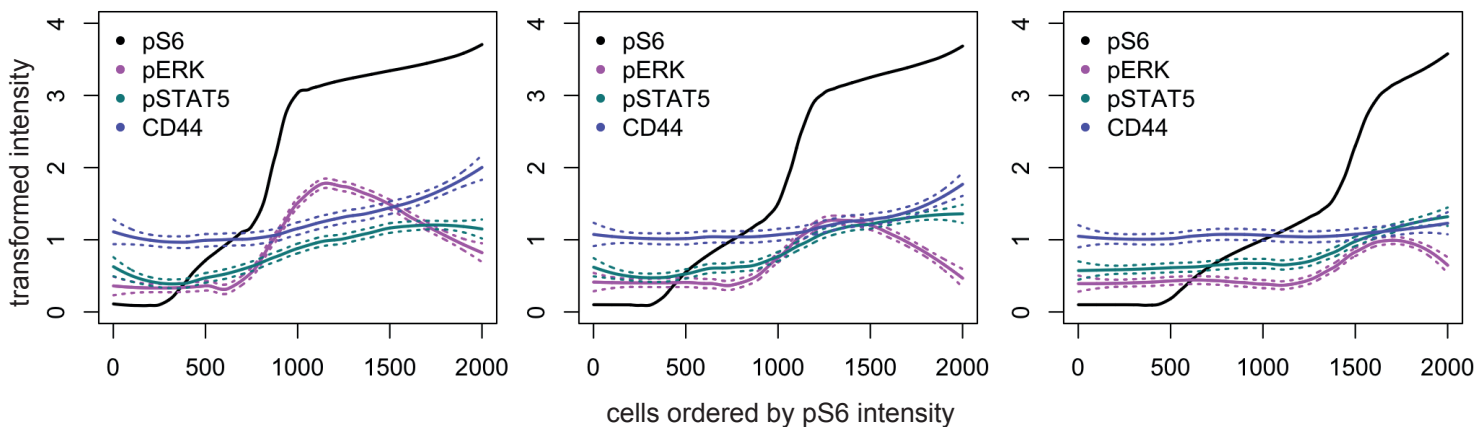

D

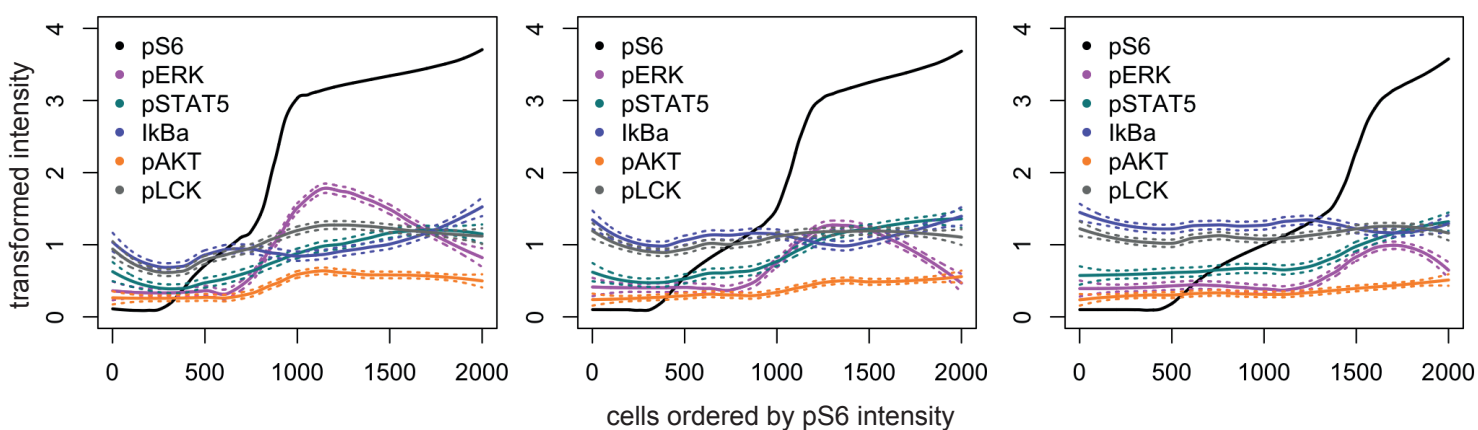

Supplement: supp [file elife-53948-supp-v1.zip]

## Figure 4 - figure supplement 2

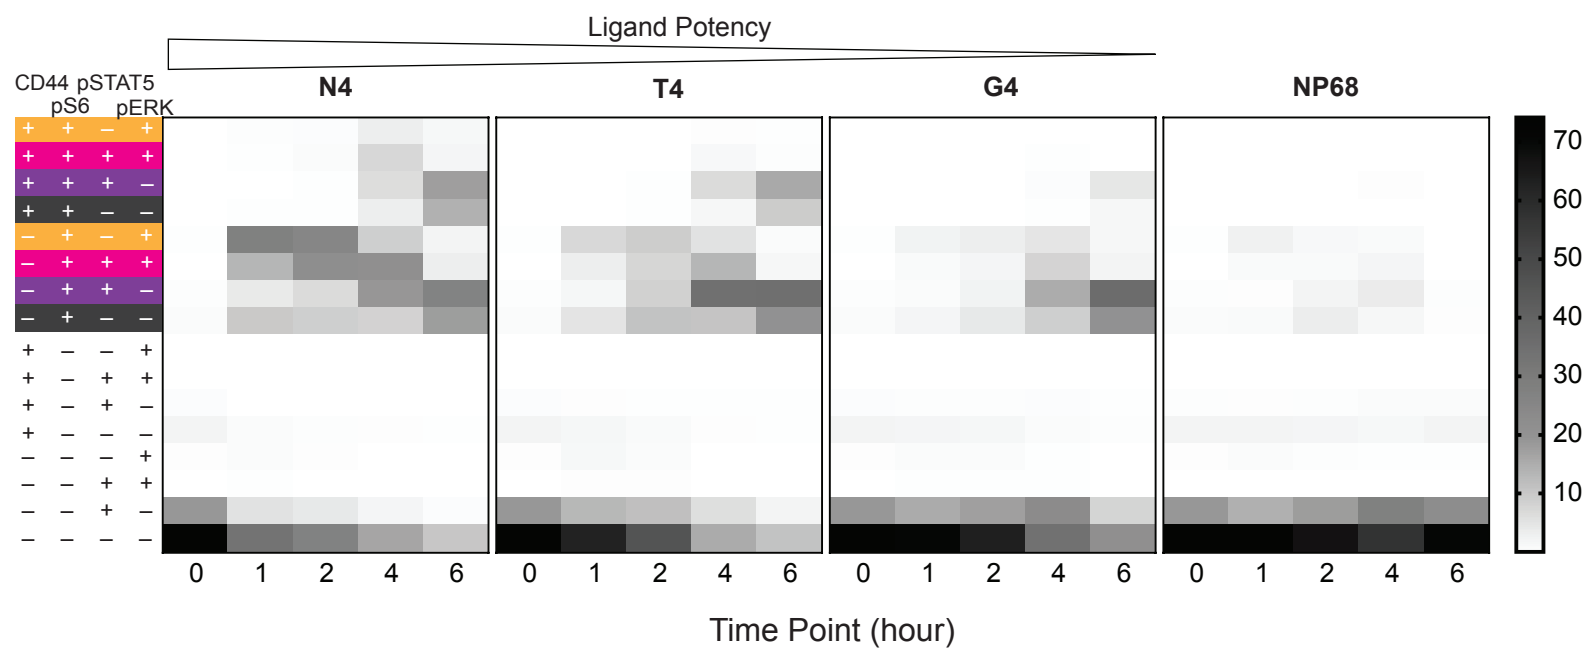

Supplement: supp [file elife-53948-supp-v1.zip]

Figure 3 - figure supplement 3

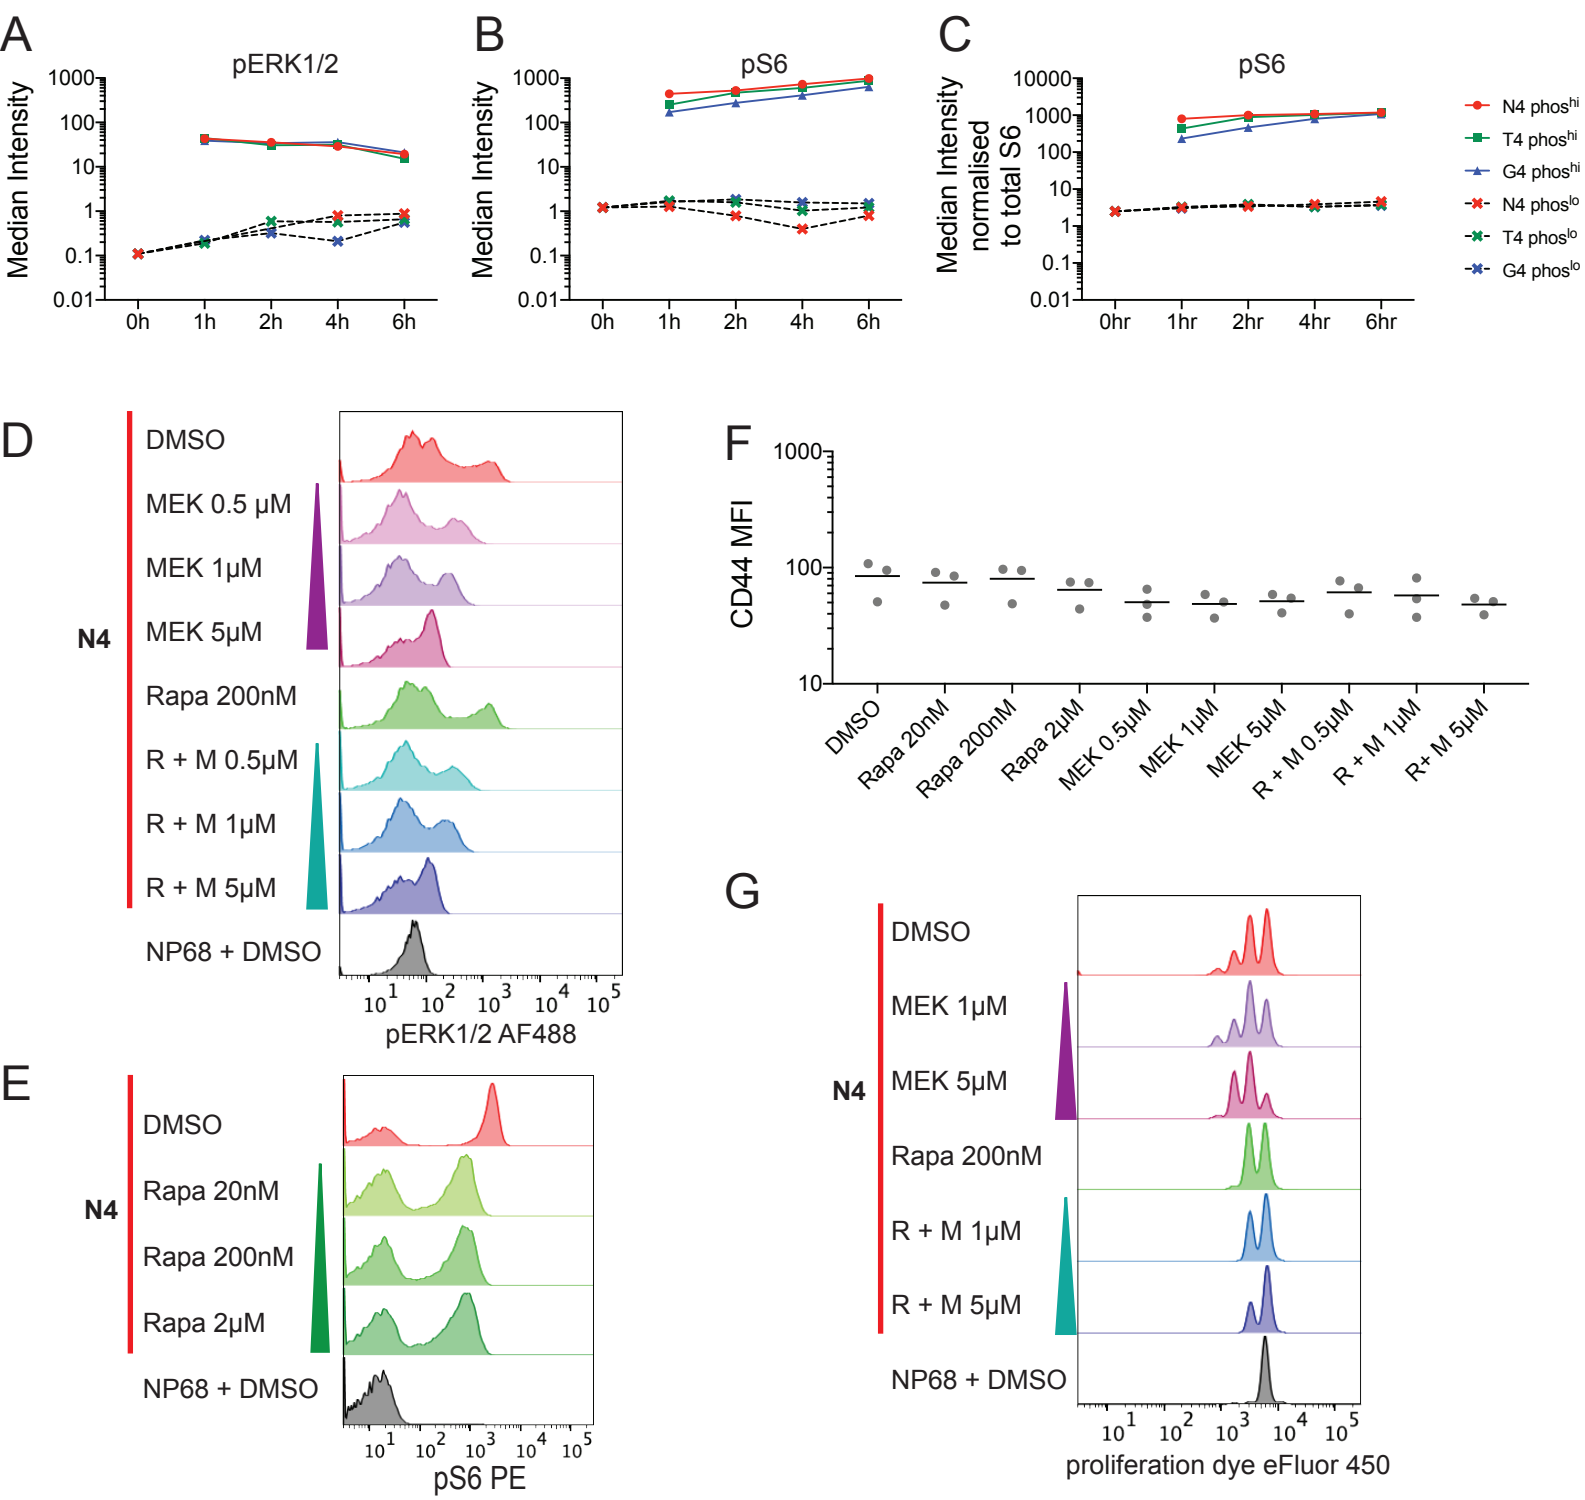

Supplement: supp [file elife-53948-supp-v1.zip]

Figure 3 - figure supplement 1

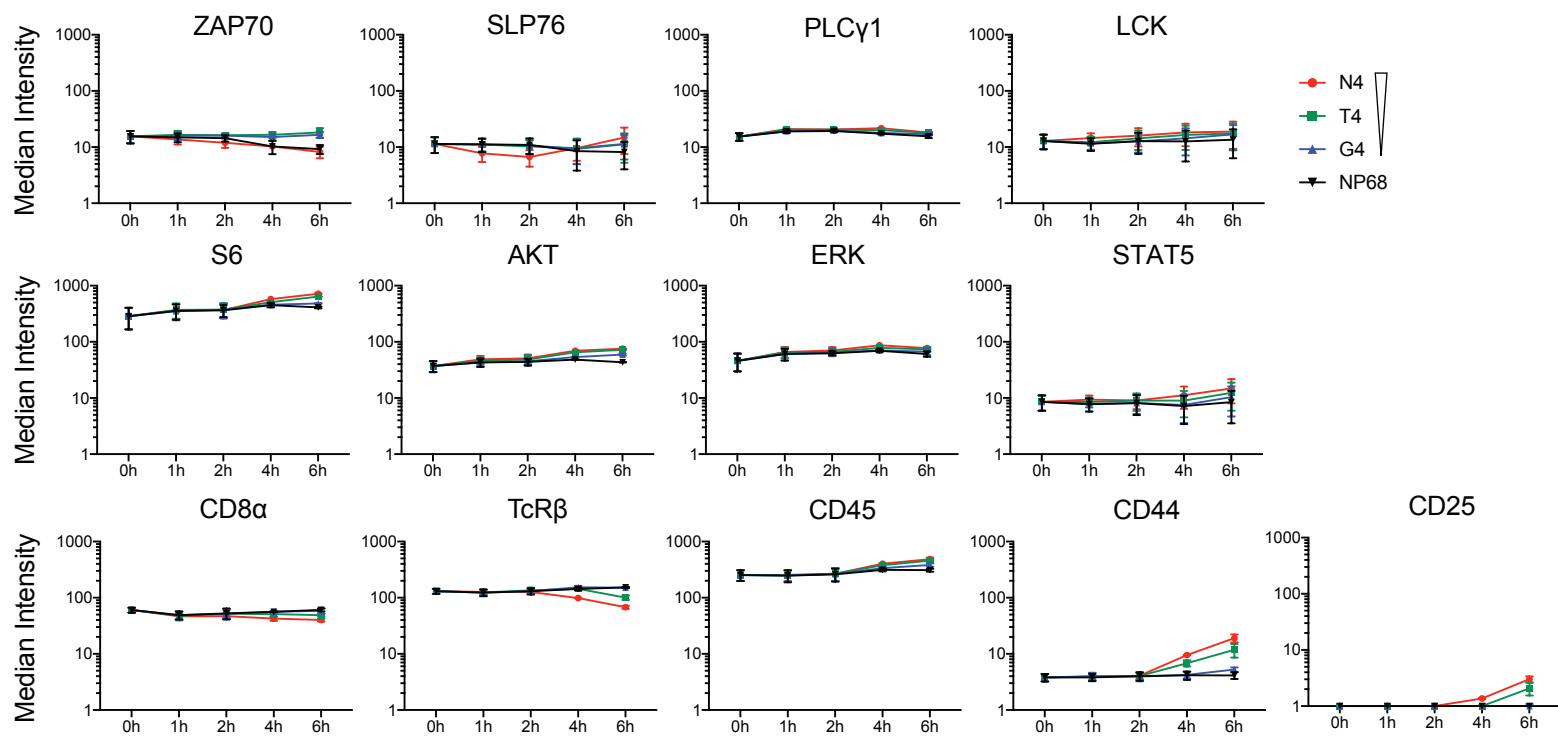

Supplement: supp [file elife-53948-supp-v1.zip]

Figure 2 - figure supplement 1

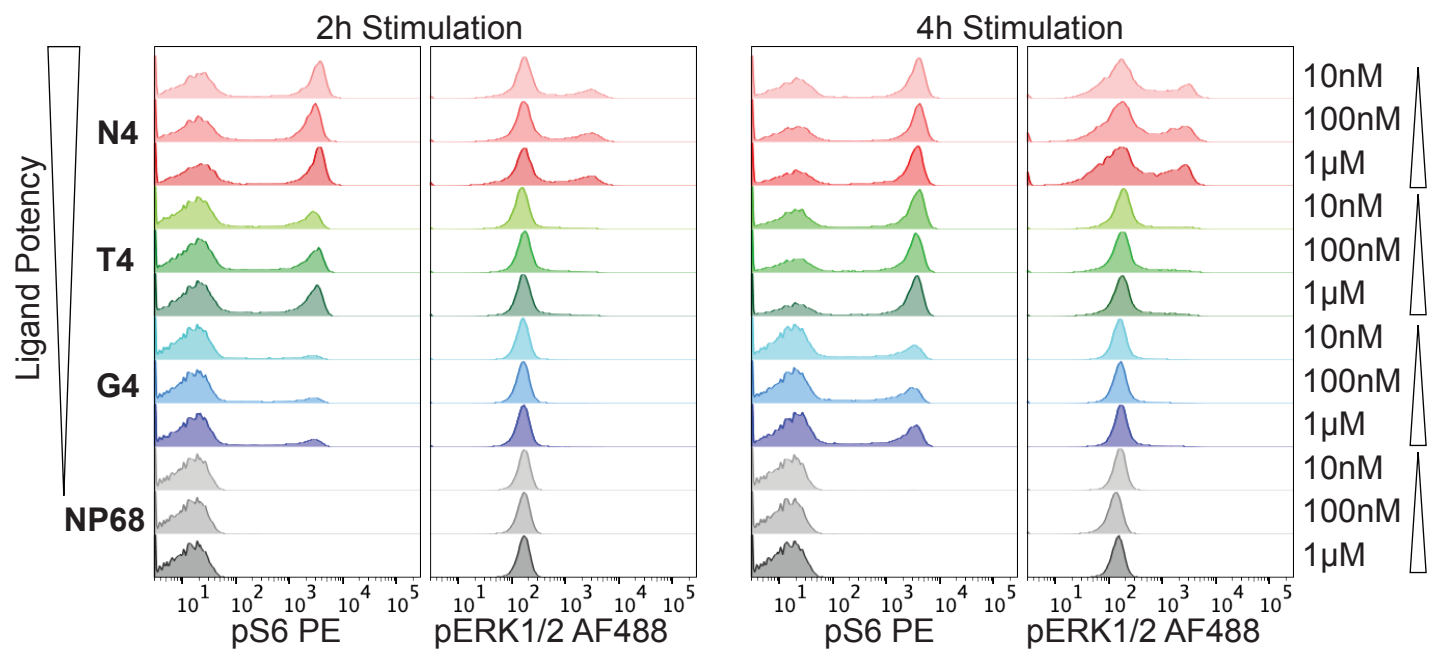

Supplement: supp [file elife-53948-supp-v1.zip › elife_poa_e53948_Figure_2_figure_supplement_1.pdf]

Figure 2 - figure supplement 2

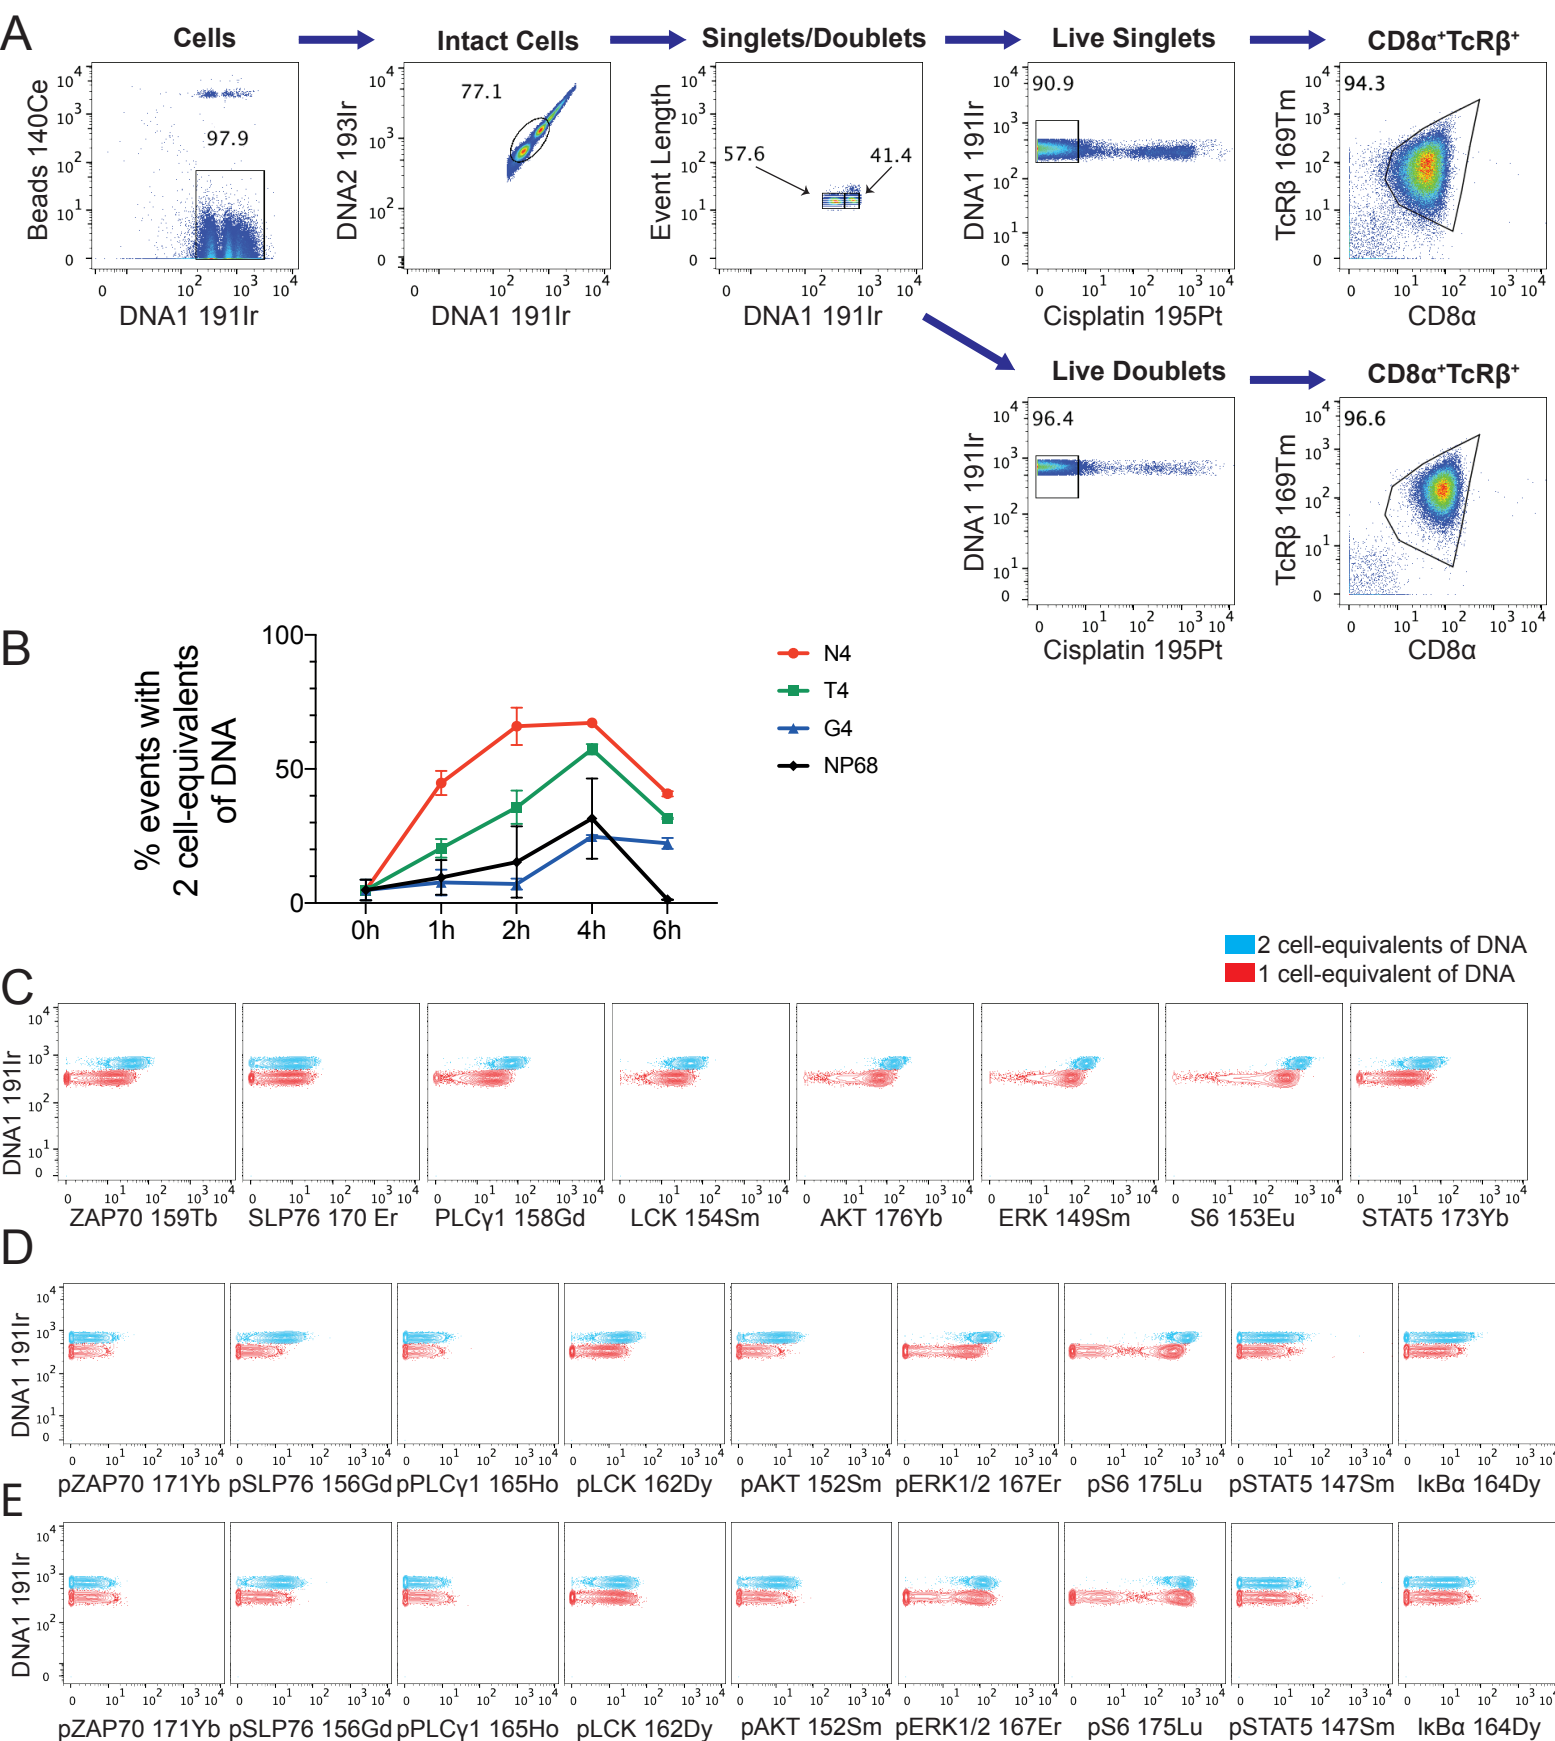

Supplement: supp [file elife-53948-supp-v1.zip › elife_poa_e53948_Figure_2_figure_supplement_2.pdf]

Figure 3 - figure supplement 2

A

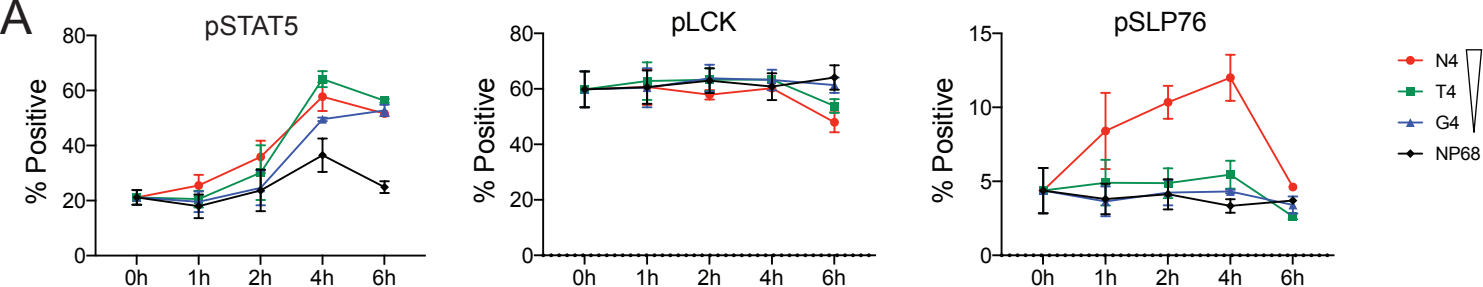

B

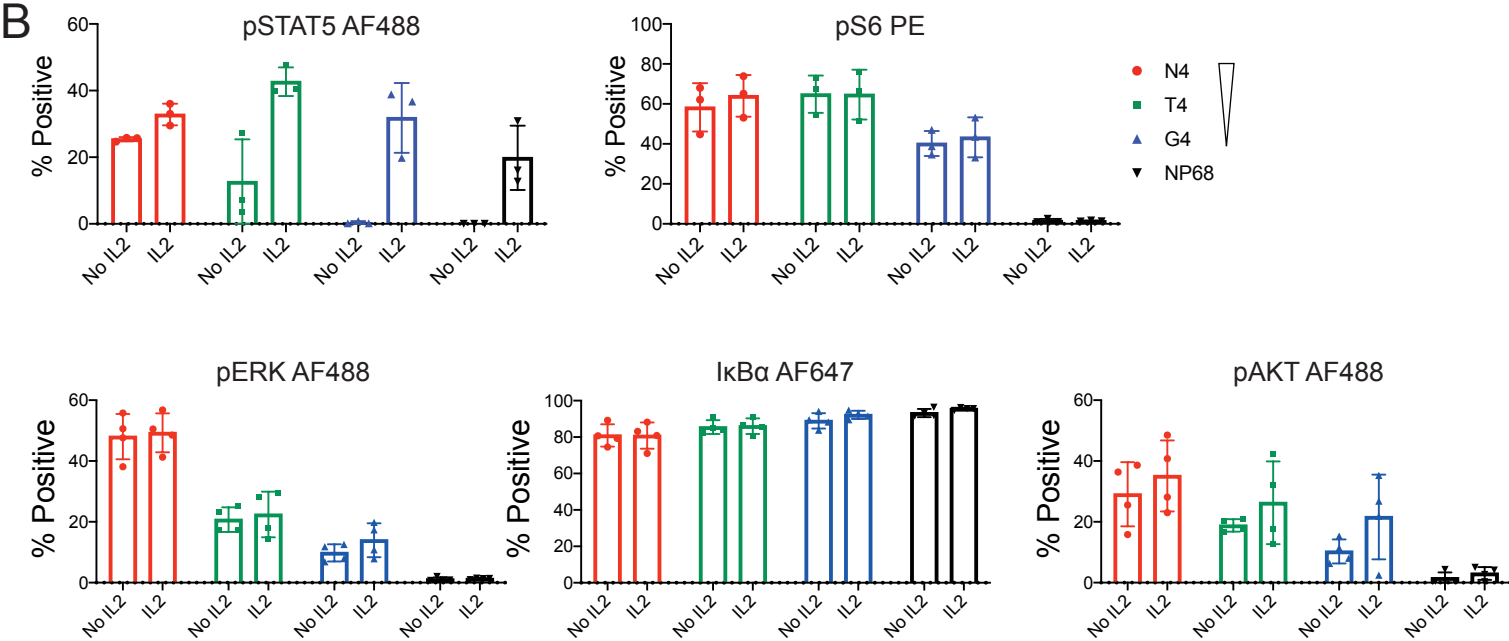

Supplement: supp [file elife-53948-supp-v1.zip › elife_poa_e53948_Figure_3_figure_supplement_2.pdf]

Figure 4 - figure supplement 1

A

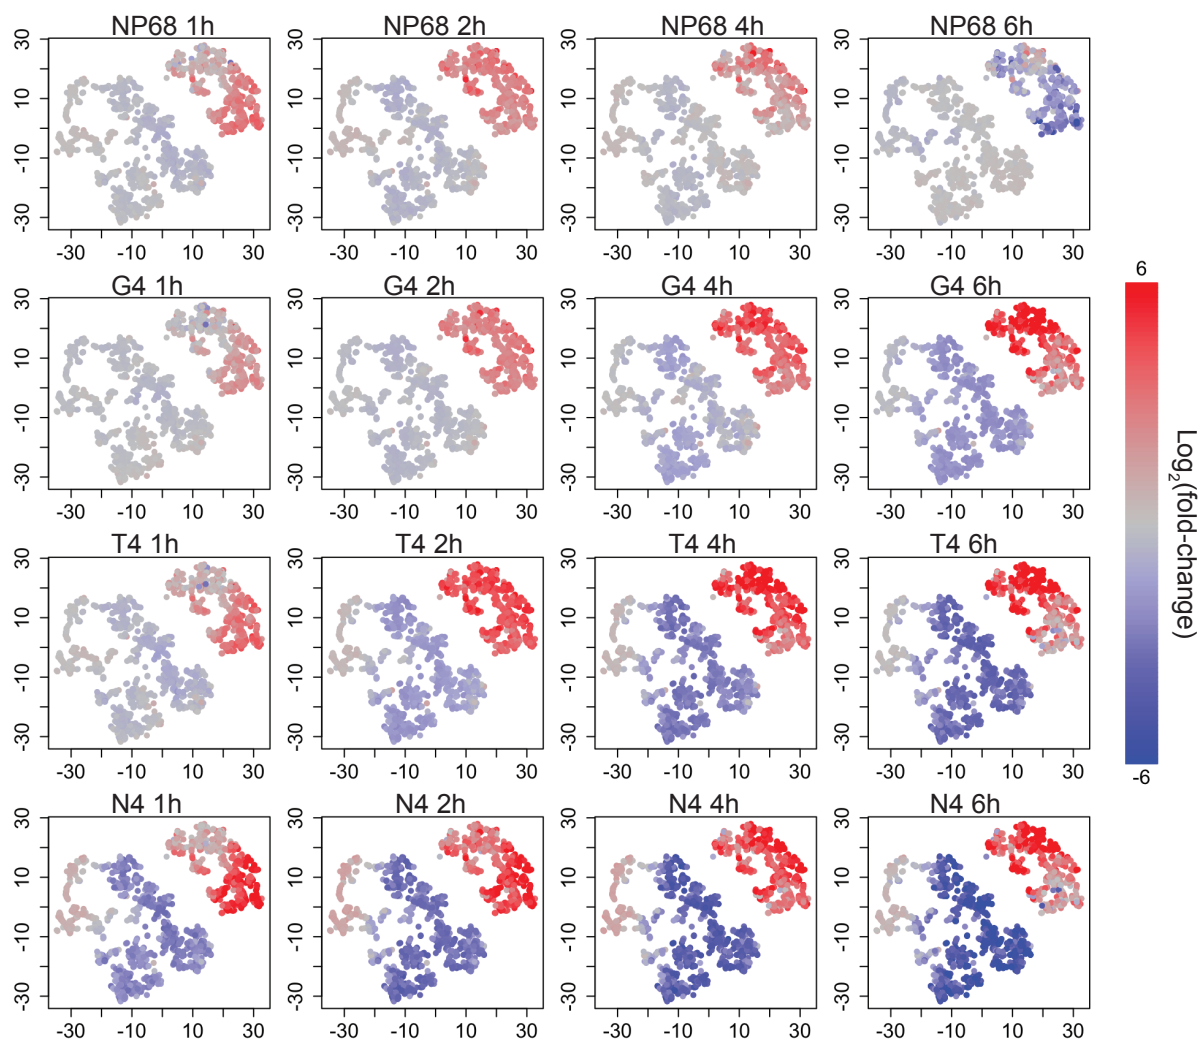

B

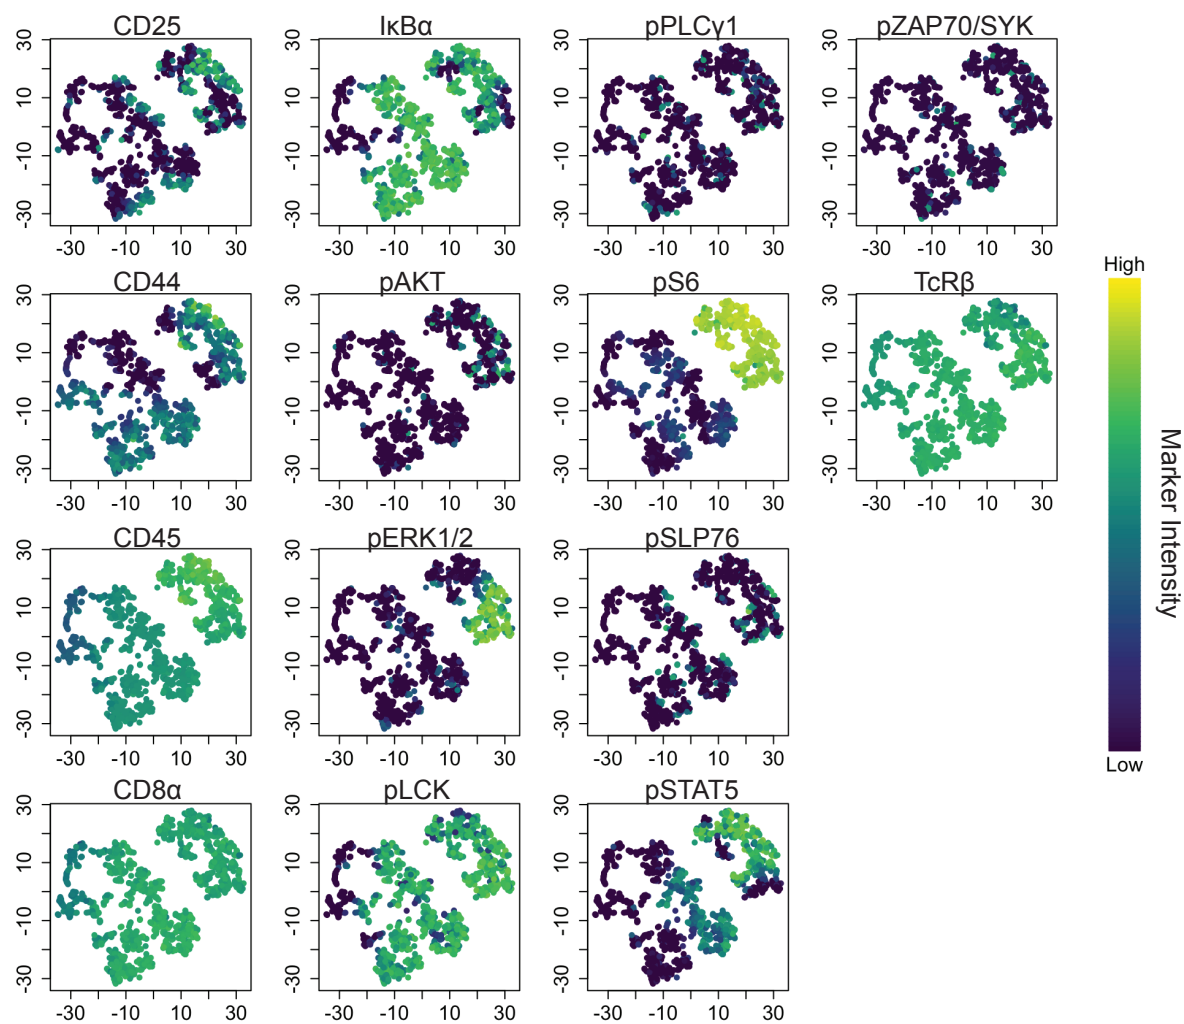

Supplement: supp [file elife-53948-supp-v1.zip › elife_poa_e53948_Figure_4_figure_supplement_1.pdf]

Figure 6 - figure supplement 1

A

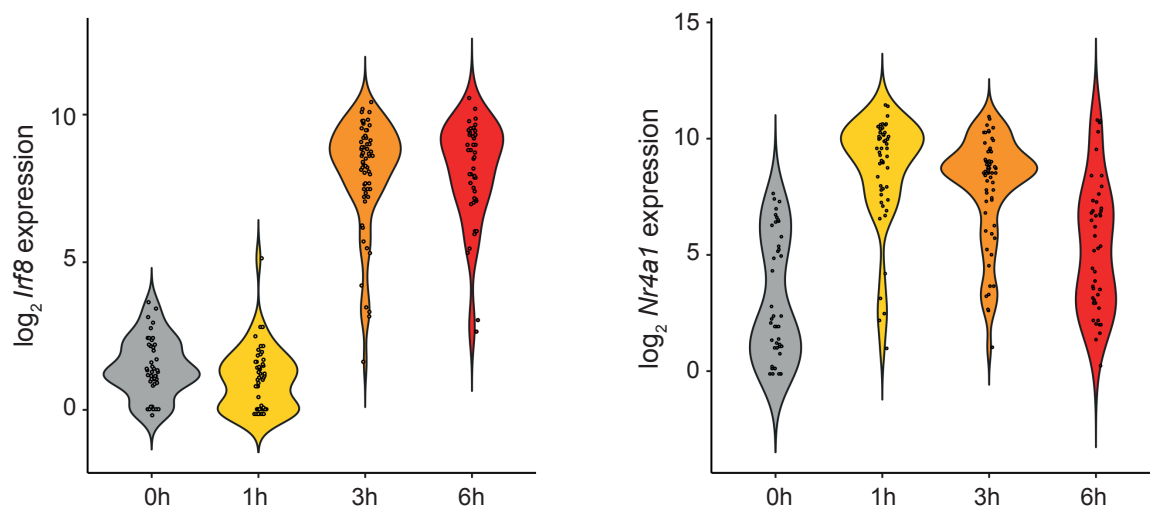

B

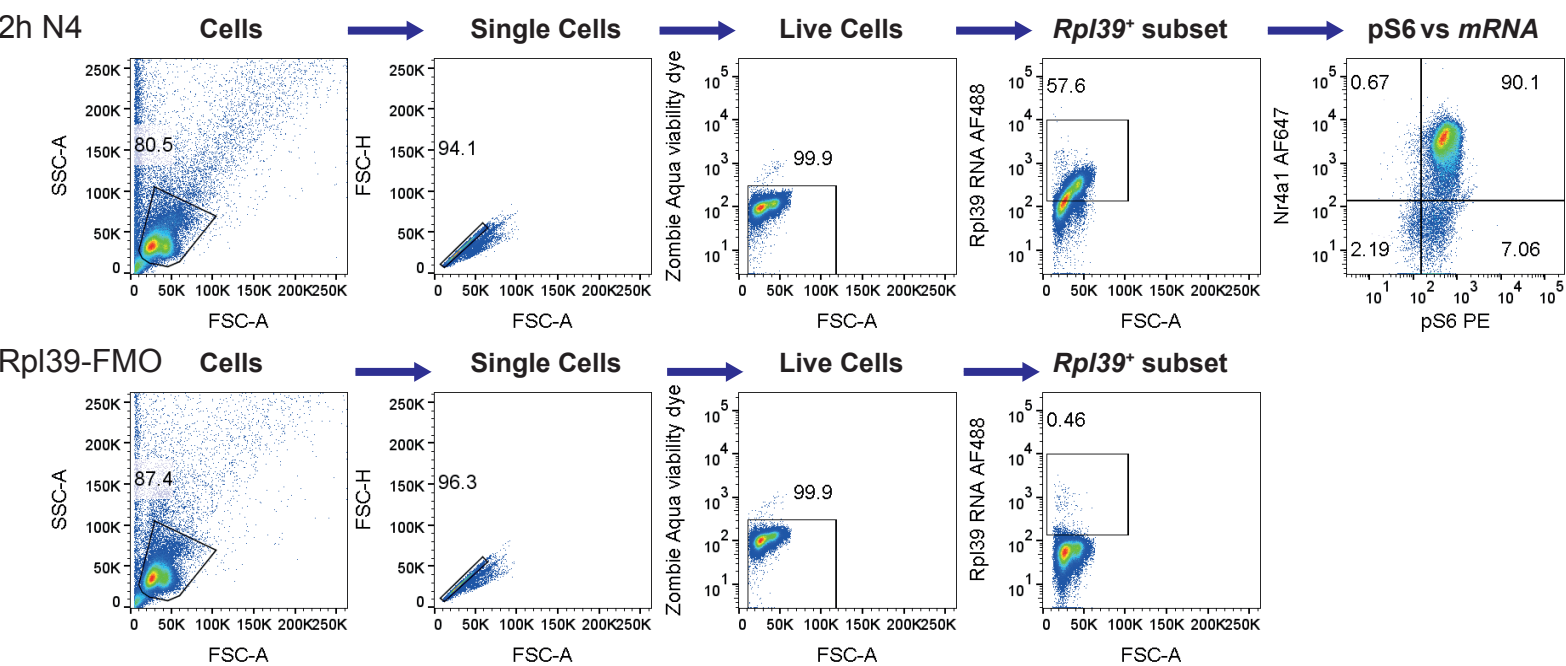

C

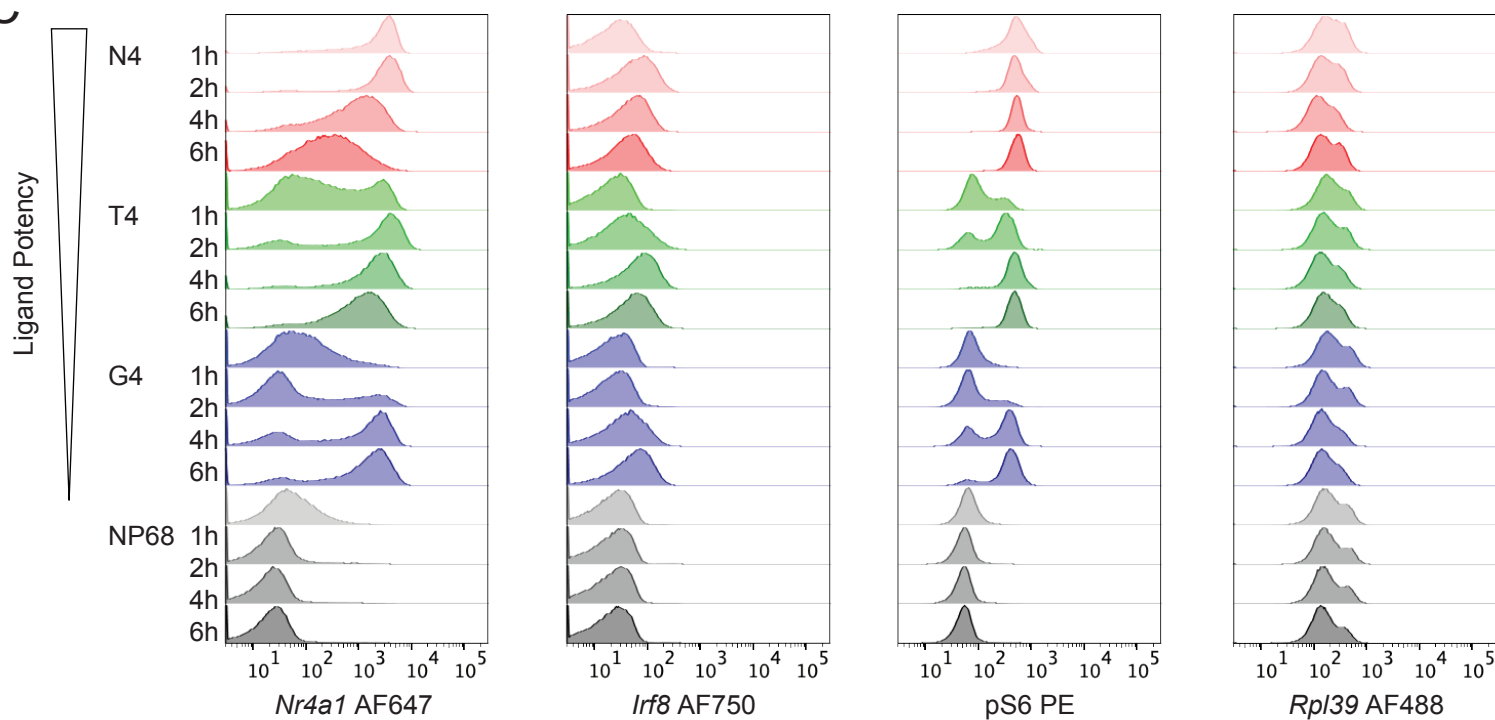

Supplement: supp [file elife-53948-supp-v1.zip › elife_poa_e53948_Figure_6_figure_supplement_1.pdf]

Figure 7 - figure supplement 1

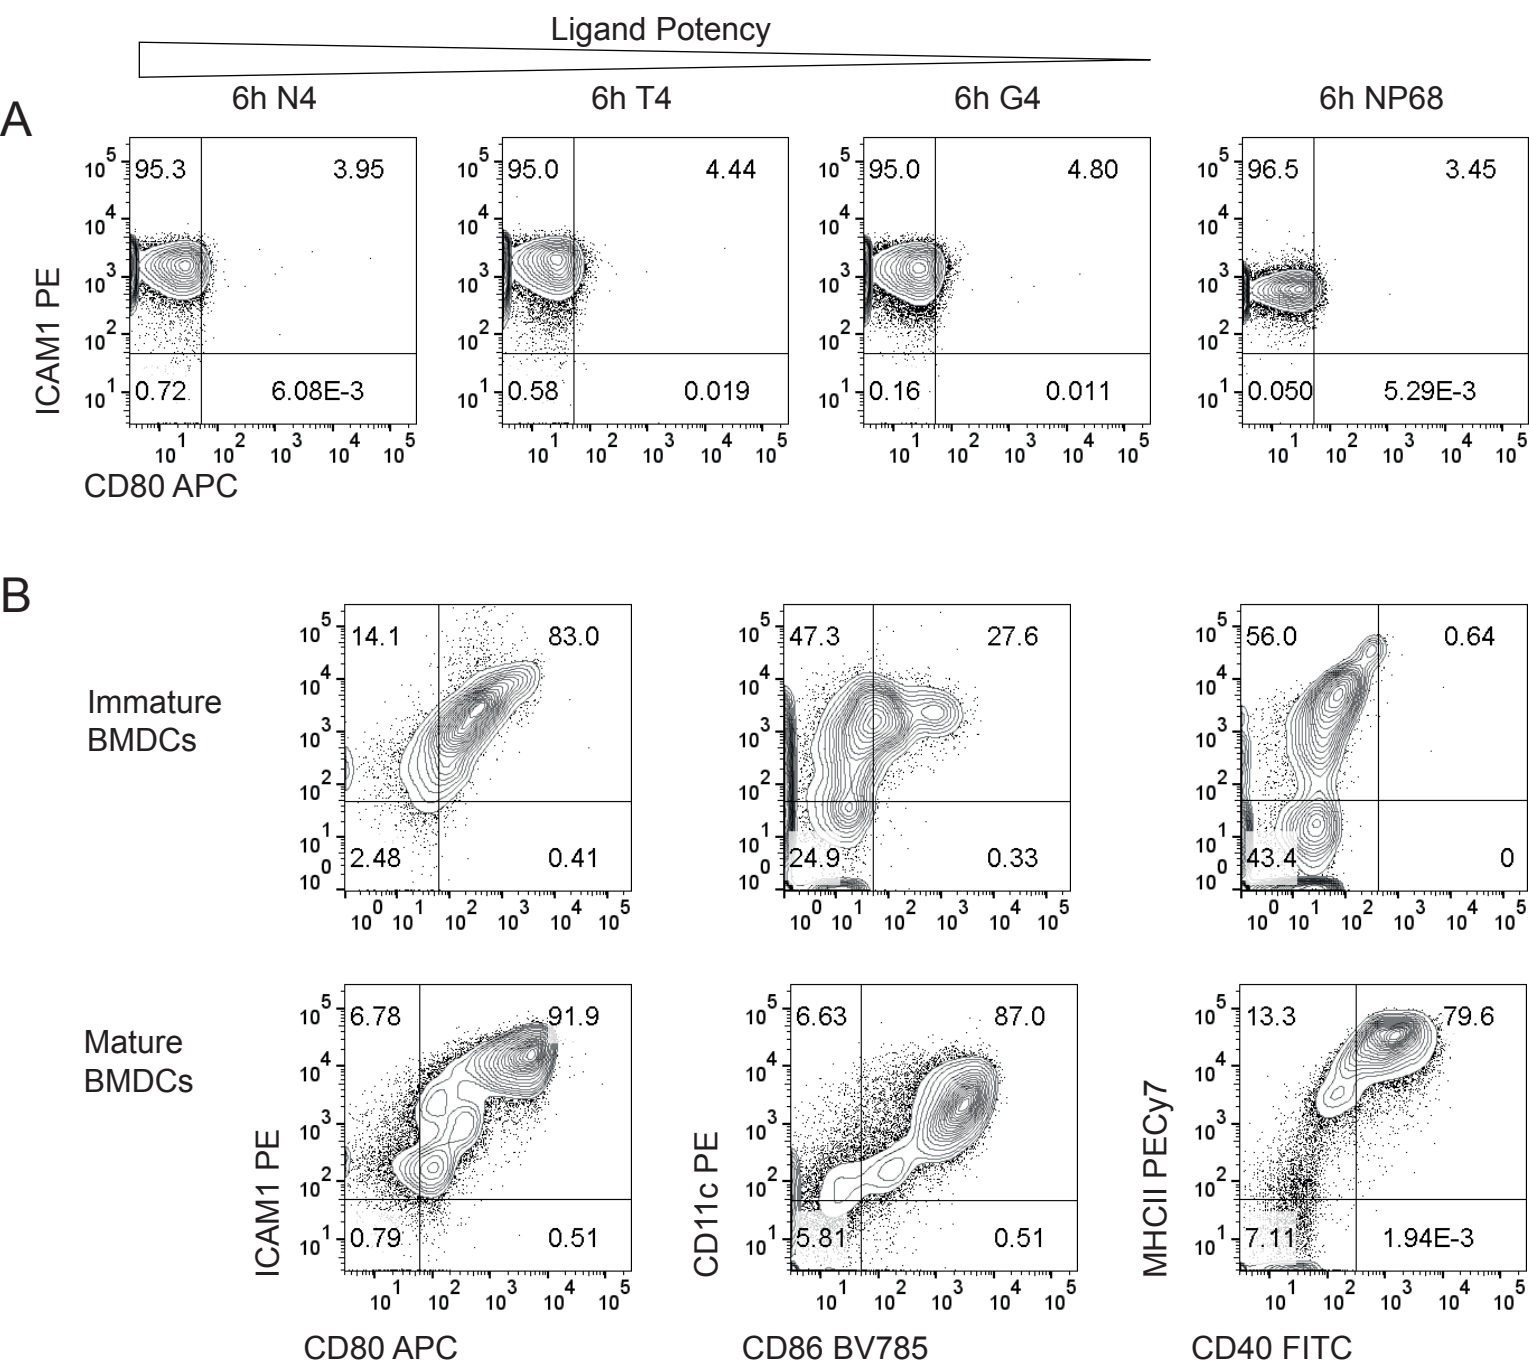

Supplement: supp [file elife-53948-supp-v1.zip › elife_poa_e53948_Figure_7_figure_supplement_1.pdf]
